# Supplementary material for: Transcriptome Analysis Reveals Putative Target Genes of APETALA3-3 During Early Floral Development in Nigella damascena L
Source: Front Plant Sci. 2021 Jun 4;12:660803. doi: 10.3389/fpls.2021.660803 (PMC8212990; doi:10.3389/fpls.2021.660803)
Supplement: Supplementary file 1 [file Data_Sheet_1.xlsx]

## Sheet: TableS1
List of primers
experiment	name	sequence 5'-3'
Gene expression	RN_20658-qF	GAAAGGGGATTTGGAACGAG
	RN_20658-qF	AACGCAGAAACAACAGTGAGG
	APE3-3_P_U508	gccaggggtgaggatcctta
	APE3_3_P L662	cccagtcgtaaattgtaatgtccataa
	RN_033731-qF	TGATGATGAAGGTTGGTGGA
	RN_033731-qR	GCTCAAGTGGGATGGAGAAG
	RN_068534-qF	CGAAGATGTAGCGAATGAGAGG
	RN_068534-qR	GGAGTTGGTAGGAAGCGTGA
	RN _022261-qF	GACAGTGGAGGAGCCATCAG
	RN _022261-qR	CGAAGCAACTGAATTAACAGCA
	RN_003019-qF	TGGAACAAGAAGCGAATCA
	RN_003019-qR	TCACAAGCCACCACATTACA
	RN_067969-qF	CGCTGGTCTTATGTCTTTCATT
	RN_067969-qR	ACTGTTCTTCCACACGCTTC
	RN_ 030279-qF	TTGGAGGAGGGAAGAGAGTG
	RN_ 030279-qR	GATGAAGTTTGCGAGTTGTGAG
	RN_ 063881-qF	AAGGAGTGTGAAGGAGATTACGA
	RN_ 063881-qR	ATTTGGGTTTGTGGTGGAGA
	RN_033684-qF	TGTTGGTGTGGGTGTTGTTC
	RN_033684-qR	CTGCTTCTTTTCCTCTTTCTTCTC
	RN_062227-F	CTGACATAGAGGCTGGGTTGG
	RN_062227-U	AAGTCGCCAGAAACAGAGTGT
	RN_025445-F	GATATGACTGCCTTCTCTTCGATTTG
	RN_025445-U	CCATTGTCGTCCCATAATTCTTGTAC
	RN_001616-F	AATGGATCTGAACATGCACCTACT
	RN_001616-U	CTACACTCCATATCCCAAACCTCTT
	RN_046498-F	TGGGAATCAGGCAGTTGTTGTA
	RN_046498-U	TCTCGCCCACCATTAACTGTAC
	RN_007610-F	TTGACTTTTGGTTTGGGGTTTGT
	RN_007610-U	AGCACGACAGAGAAGCATGAT
	RN_025386-F	GCAGCATTGGAATCAGCAACTAT
	RN_025386-U	GGCTGTAACACAAATTCCATGCT
	RN-002638-1F	CGTCCACTTCCCACTTTCTC
	RN-002638-2R	TCTACCAAGTCGGCAAATGA
NIs sequence validation	RN-006621-1F	AAATGCGCGCTTAAGGAAA
	RN-006621-2R	TCATCATCTCCCTCTTCCGTAT
	RN-007670-1F	CCAAAGCTTTCCTTCTTTTGG
	RN-007670-2R	GCACATGAGCTAGAAATCTCAAA
	RN-032021-1F	CCCATCTCATCTCCCCACT
	RN-032021-2R	CCAGCAACCCTGTTCATCTT
	RN-055063-1F	ATGTGCAACGGCAATACTCA
	RN-055063-2R	ACAAAGCAATCCATCCACCA
	RN-064779-1F	TGAGAGAGATGTCGTCCTTCTG
	RN-064779-2R	CAAGTGGAAGAAAAGGGAAGG
	RN-065256-1F	GGTGAAAGCTCTTCGCCTTA
	RN-065256-2R	AACAAAAATCCGAATAAAACATTGA
	RN-013160-1F	AGCCATGTCAATGGTGATTTC
	RN-013160-2R	ACTGCATAACCACCAACAACAC
	RN-013160-3F	TGTTGATATCAGGTTTGGCTTG
	RN-013160-4R	TATTAATCAGTTTTACTGGCTTGAGG
	RN-060063-1F	AACTATTGTAGTTTCGTCTCCAAGC
	RN-060063-2R	AAAGCATTTGAGACCTACTGGTTC
	RN-060063-3F	CCAAACCATGTCCTCTTTTGG
	RN-060063-4R	TAAATGGATCCACGTCCTACATC

## Sheet: TableS2
Annotation of 34,614 informative genes
Nigella genes		TAIR				Protéome Ancolie
Id	Morph_DEG	qseqid	ssqid	evalue	description	query_peptide	subject	evalue	Best-hit-arabi-name	arabi-defline
RN_000001	no	REFNigelle_000001.p1	AT1G13900.1	0	PAP2 description:Probable inactive purple acid phosphatase 2 [Source:Q9LMG7]	REFNigelle_000001.p1	Aqcoe3G359400.1.p	0	AT1G13900.1	Purple acid phosphatases superfamily protein
RN_000002	no	REFNigelle_000002.p1	AT3G11910.2	9.43e-30	UBP13 description:UBP13 [Source:A0A178VEE0]	REFNigelle_000002.p1	Aqcoe1G070600.1.p	7e-39	AT5G06600.2	ubiquitin-specific protease 12
RN_000003	no	REFNigelle_000003.p1	AT1G09900.1	1.94e-70	Pentatricopeptide repeat-containing protein At1g09900 [Source:UniProtKB/Swiss-Prot;Acc:Q3EDF8]	REFNigelle_000003.p1	Aqcoe1G030000.1.p	0	AT1G05670.2	Pentatricopeptide repeat (PPR-like) superfamily protein
RN_000004	no	REFNigelle_000004.p2	AT5G20240.1	4.67e-21	PI description:Floral homeotic protein PISTILLATA [Source:P48007]	REFNigelle_000004.p2	Aqcoe6G031900.1.p	1e-42	AT5G20240.1	K-box region and MADS-box transcription factor family protein
RN_000005	no	ni	ni	ni	ni	ni	ni	ni	ni	ni
RN_000007	yes	REFNigelle_000007.p1	AT5G20620.1	0	UBQ4 description:Polyubiquitin 4 [Source:P0CH32]	REFNigelle_000007.p1	Aqcoe1G364300.3.p	0	AT4G05320.4	polyubiquitin 10
RN_000008	no	REFNigelle_000008.p1	AT4G05050.3	1.7e-119	UBQ11 description:Polyubiquitin [Source:Q8H0Y0]	REFNigelle_000008.p1	Aqcoe1G364300.4.p	1e-118	AT4G05320.4	polyubiquitin 10
RN_000009	no	ni	ni	ni	ni	ni	ni	ni	ni	ni
RN_000010	no	ni	ni	ni	ni	ni	ni	ni	ni	ni
RN_000011	no	REFNigelle_000011.p1	AT1G09190.1	0	PCMP-E70 description:Pentatricopeptide repeat-containing protein At1g09190 [Source:O80488]	REFNigelle_000011.p1	Aqcoe2G278600.1.p	0	AT1G09190.1	Tetratricopeptide repeat (TPR)-like superfamily protein
RN_000013	no	ni	ni	ni	ni	ni	ni	ni	ni	ni
RN_000014	no	REFNigelle_000014.p1	AT2G41670.1	0	SIN2 description:Short integuments 2, mitochondrial [Source:Q8L607]	REFNigelle_000014.p1	Aqcoe5G380200.2.p	0	AT2G41670.1	P-loop containing nucleoside triphosphate hydrolases superfamily protein
RN_000016	no	REFNigelle_000016.p1	AT3G01910.1	0	SOX description:Sulfite oxidase [Source:Q0WWA1]	REFNigelle_000016.p1	Aqcoe5G359200.1.p	0	AT3G01910.1	sulfite oxidase
RN_000017	no	REFNigelle_000017.p1	AT3G06720.1	0	IMPA1 description:Importin subunit alpha [Source:A0A178VHS3]	REFNigelle_000017.p1	Aqcoe2G281000.1.p	0	AT3G06720.1	importin alpha isoform 1
RN_000018	no	REFNigelle_000018.p1	AT3G06720.1	0	IMPA1 description:Importin subunit alpha [Source:A0A178VHS3]	REFNigelle_000018.p1	Aqcoe2G281000.1.p	0	AT3G06720.1	importin alpha isoform 1
RN_000019	no	ni	ni	ni	ni	REFNigelle_000019.p3	Aqcoe2G128200.1.p	3e-09	0	0
RN_000020	no	REFNigelle_000020.p1	AT1G15660.1	1.42e-23	CENP-C description:Centromere protein C [Source:Q66LG9]	REFNigelle_000020.p1	Aqcoe7G194000.1.p	4e-118	AT1G15660.1	centromere protein C
RN_000023	no	REFNigelle_000023.p1	AT5G24810.1	7.64e-137	ABC1 family protein [Source:UniProtKB/TrEMBL;Acc:F4KIJ2]	REFNigelle_000023.p1	Aqcoe7G289900.1.p	0	AT5G24810.2	ABC1 family protein
RN_000024	no	ni	ni	ni	ni	ni	ni	ni	ni	ni
RN_000025	no	REFNigelle_000025.p1	AT5G56710.1	1.14e-53	RPL31C description:60S ribosomal protein L31-3 [Source:P51420]	REFNigelle_000025.p1	Aqcoe7G139600.1.p	3e-48	AT5G56710.1	Ribosomal protein L31e family protein
RN_000027	no	REFNigelle_000027.p1	AT3G04740.1	3.05e-179	MED14 description:Mediator of RNA polymerase II transcription subunit 14 [Source:Q9SR02]	REFNigelle_000027.p1	Aqcoe2G268600.1.p	0	AT3G04740.1	RNA polymerase II transcription mediators
RN_000028	yes	ni	ni	ni	ni	ni	ni	ni	ni	ni
RN_000029	no	REFNigelle_000029.p1	AT5G41980.1	1.46e-60	At5g41980 [Source:UniProtKB/TrEMBL;Acc:Q9FHY5]	REFNigelle_000029.p2	Aqcoe5G024500.4.p	5e-11	0	0
RN_000030	no	REFNigelle_000030.p1	AT1G50410.3	0	CHR28 description:Helicase-like transcription factor CHR28 [Source:Q94BR5]	REFNigelle_000030.p1	Aqcoe3G440500.1.p	0	AT1G50410.1	SNF2 domain-containing protein / helicase domain-containing protein / zinc finger protein-related
RN_000031	no	ni	ni	ni	ni	ni	ni	ni	ni	ni
RN_000032	no	ni	ni	ni	ni	ni	ni	ni	ni	ni
RN_000033	no	REFNigelle_000033.p1	AT4G23160.2	7.29e-33	CRK8 description:cysteine-rich RLK (RECEPTOR-like protein kinase) 8 [Source:AT4G23160]	ni	ni	ni	ni	ni
RN_000034	no	ni	ni	ni	ni	ni	ni	ni	ni	ni
RN_000035	no	REFNigelle_000035.p1	AT3G09040.1	0	Pentatricopeptide repeat (PPR) superfamily protein [Source:UniProtKB/TrEMBL;Acc:A0A1I9LQP8]	REFNigelle_000035.p1	Aqcoe5G291400.1.p	0	AT3G09040.1	Pentatricopeptide repeat (PPR) superfamily protein
RN_000036	no	REFNigelle_000036.p1	AT4G02610.1	3.98e-160	TRPA1 description:Tryptophan synthase alpha chain [Source:O22765]	REFNigelle_000036.p1	Aqcoe5G043600.1.p	9e-165	AT3G54640.1	tryptophan synthase alpha chain
RN_000037	no	ni	ni	ni	ni	ni	ni	ni	ni	ni
RN_000038	no	ni	ni	ni	ni	ni	ni	ni	ni	ni
RN_000039	no	ni	ni	ni	ni	ni	ni	ni	ni	ni
RN_000040	yes	ni	ni	ni	ni	ni	ni	ni	ni	ni
RN_000041	no	REFNigelle_000041.p1	AT1G67180.2	1.89e-104	F5A8.9 protein [Source:UniProtKB/TrEMBL;Acc:Q9ZW89]	REFNigelle_000041.p1	Aqcoe3G387900.2.p	0	AT1G67180.1	zinc finger (C3HC4-type RING finger) family protein / BRCT domain-containing protein
RN_000042	no	ni	ni	ni	ni	ni	ni	ni	ni	ni
RN_000043	no	REFNigelle_000043.p1	AT4G14930.1	1.06e-127	At4g14930 [Source:UniProtKB/TrEMBL;Acc:Q8LAM2]	REFNigelle_000043.p1	Aqcoe2G344400.2.p	2e-143	AT4G14930.1	Survival protein SurE-like phosphatase/nucleotidase
RN_000044	no	REFNigelle_000044.p1	AT3G62870.1	1.71e-114	RPL7AB description:60S ribosomal protein L7a-2 [Source:Q9LZH9]	REFNigelle_000044.p1	Aqcoe3G377300.1.p	1e-95	AT3G62870.1	Ribosomal protein L7Ae/L30e/S12e/Gadd45 family protein
RN_000045	no	REFNigelle_000045.p1	AT1G78830.1	3.5e-135	EP1-like glycoprotein 2 [Source:UniProtKB/Swiss-Prot;Acc:Q9ZVA2]	REFNigelle_000045.p1	Aqcoe1G225700.1.p	0	AT1G78830.1	Curculin-like (mannose-binding) lectin family protein
RN_000046	no	REFNigelle_000046.p1	AT4G30150.1	0	CONTAINS InterPro DOMAIN/s: Nucleolar 27S pre-rRNA processing, Urb2/Npa2 (InterPro:AT4G30150]	REFNigelle_000046.p1	Aqcoe2G157200.1.p	0	AT4G30150.1	0
RN_000047	no	REFNigelle_000047.p2	AT5G28010.2	6.2e-17	Polyketide cyclase/dehydrase and lipid transport superfamily protein [Source:UniProtKB/TrEMBL;Acc:F4K5S5]	REFNigelle_000047.p2	Aqcoe3G043900.1.p	8e-65	AT1G70830.1	MLP-like protein 28
RN_000048	no	REFNigelle_000048.p1	AT1G72050.1	5.81e-84	TFIIIA description:transcription factor IIIA [Source:AT1G72050]	REFNigelle_000048.p1	Aqcoe3G421100.1.p	2e-135	AT1G72050.2	transcription factor IIIA
RN_000049	no	REFNigelle_000049.p1	AT1G72050.2	2.62e-132	TFIIIA description:transcription factor IIIA [Source:AT1G72050]	REFNigelle_000049.p1	Aqcoe3G421100.1.p	0	AT1G72050.2	transcription factor IIIA
RN_000051	yes	ni	ni	ni	ni	ni	ni	ni	ni	ni
RN_000053	no	REFNigelle_000053.p1	AT4G18770.1	2.82e-56	MYB98 description:Transcription factor MYB98 [Source:Q9S7L2]	REFNigelle_000053.p1	Aqcoe3G285100.1.p	8e-93	AT4G18770.1	myb domain protein 98
RN_000056	no	ni	ni	ni	ni	ni	ni	ni	ni	ni
RN_000059	no	REFNigelle_000059.p1	AT1G36730.1	0	Probable eukaryotic translation initiation factor 5-1 [Source:UniProtKB/Swiss-Prot;Acc:Q9C8F1]	REFNigelle_000059.p1	Aqcoe3G377200.1.p	0	AT1G36730.1	Translation initiation factor IF2/IF5
RN_000060	no	REFNigelle_000060.p1	AT1G36730.1	0	Probable eukaryotic translation initiation factor 5-1 [Source:UniProtKB/Swiss-Prot;Acc:Q9C8F1]	REFNigelle_000060.p1	Aqcoe3G377200.1.p	0	AT1G36730.1	Translation initiation factor IF2/IF5
RN_000061	no	REFNigelle_000061.p1	AT1G36730.1	0	Probable eukaryotic translation initiation factor 5-1 [Source:UniProtKB/Swiss-Prot;Acc:Q9C8F1]	REFNigelle_000061.p1	Aqcoe3G377200.1.p	0	AT1G36730.1	Translation initiation factor IF2/IF5
RN_000062	no	ni	ni	ni	ni	ni	ni	ni	ni	ni
RN_000063	no	REFNigelle_000063.p1	AT3G46530.1	5.73e-50	RPP13 description:Disease resistance protein RPP13 [Source:Q9M667]	REFNigelle_000063.p1	Aqcoe3G358000.1.p	2e-66	AT1G58807.1	Disease resistance protein (CC-NBS-LRR class) family
RN_000065	no	ni	ni	ni	ni	ni	ni	ni	ni	ni
RN_000066	no	REFNigelle_000066.p1	AT3G42723.1	5.29e-13	ATP binding / aminoacyl-tRNA ligase/ nucleotide binding protein [Source:UniProtKB/TrEMBL;Acc:F4IWM0]	REFNigelle_000066.p1	Aqcoe7G257100.1.p	6e-09	ATMG00860.1	DNA/RNA polymerases superfamily protein
RN_000067	yes	ni	ni	ni	ni	ni	ni	ni	ni	ni
RN_000068	no	REFNigelle_000068.p1	AT5G59970.2	2.99e-68	Histone H4 [Source:UniProtKB/TrEMBL;Acc:A0A178VF54]	REFNigelle_000068.p1	Aqcoe3G423600.1.p	1e-53	AT1G07820.1	Histone superfamily protein
RN_000069	no	REFNigelle_000069.p3	AT5G59970.2	2.99e-68	Histone H4 [Source:UniProtKB/TrEMBL;Acc:A0A178VF54]	REFNigelle_000069.p3	Aqcoe3G423600.1.p	1e-53	AT1G07820.1	Histone superfamily protein
RN_000070	no	REFNigelle_000070.p1	AT3G14840.2	2.07e-132	LRR-RLK description:Probable leucine-rich repeat receptor-like serine/threonine-protein kinase At3g14840 [Source:C0LGN2]	REFNigelle_000070.p1	Aqcoe4G025700.1.p	0	AT3G14840.2	Leucine-rich repeat transmembrane protein kinase
RN_000071	no	REFNigelle_000071.p1	AT5G11650.1	0	Alpha/beta-Hydrolases superfamily protein [Source:UniProtKB/TrEMBL;Acc:Q9LYG5]	REFNigelle_000071.p1	Aqcoe7G409700.1.p	0	AT5G11650.1	alpha/beta-Hydrolases superfamily protein
RN_000072	no	REFNigelle_000072.p1	AT5G50260.1	4.56e-150	CEP1 description:KDEL-tailed cysteine endopeptidase CEP1 [Source:Q9FGR9]	REFNigelle_000072.p1	Aqcoe3G136400.1.p	9e-173	AT5G50260.1	Cysteine proteinases superfamily protein
RN_000073	no	ni	ni	ni	ni	ni	ni	ni	ni	ni
RN_000074	no	ni	ni	ni	ni	ni	ni	ni	ni	ni
RN_000075	no	ni	ni	ni	ni	ni	ni	ni	ni	ni
RN_000076	no	REFNigelle_000076.p1	AT2G03070.1	3.33e-177	MED8 description:Mediator of RNA polymerase II transcription subunit 8 [Source:Q4V3C1]	REFNigelle_000076.p1	Aqcoe7G296300.3.p	0	AT2G03070.1	mediator subunit 8
RN_000077	no	REFNigelle_000077.p1	AT1G14130.1	1.61e-107	2-oxoglutarate (2OG) and Fe(II)-dependent oxygenase superfamily protein [Source:UniProtKB/TrEMBL;Acc:Q9XI75]	REFNigelle_000077.p1	Aqcoe4G123200.2.p	3e-159	AT1G14130.1	2-oxoglutarate (2OG) and Fe(II)-dependent oxygenase superfamily protein
RN_000078	no	ni	ni	ni	ni	ni	ni	ni	ni	ni
RN_000079	no	REFNigelle_000079.p1	AT2G36780.1	2.84e-100	UGT73C3 description:UDP-glycosyltransferase 73C3 [Source:Q9ZQ96]	REFNigelle_000079.p1	Aqcoe6G133100.1.p	2e-141	AT2G15490.3	UDP-glycosyltransferase 73B4
RN_000080	no	REFNigelle_000080.p1	AT3G53810.1	1.58e-165	LECRK42 description:L-type lectin-domain containing receptor kinase IV.2 [Source:Q9M345]	REFNigelle_000080.p1	Aqcoe1G103300.1.p	1e-151	AT3G55550.1	Concanavalin A-like lectin protein kinase family protein
RN_000081	no	ni	ni	ni	ni	ni	ni	ni	ni	ni
RN_000082	no	ni	ni	ni	ni	REFNigelle_000082.p1	Aqcoe7G172200.1.p	1e-15	AT4G37670.2	N-acetyl-l-glutamate synthase 2
RN_000083	no	REFNigelle_000083.p1	AT5G20400.1	1.34e-101	2-oxoglutarate (2OG) and Fe(II)-dependent oxygenase superfamily protein [Source:UniProtKB/TrEMBL;Acc:Q84K82]	REFNigelle_000083.p1	Aqcoe7G376100.1.p	1e-155	AT5G20400.1	2-oxoglutarate (2OG) and Fe(II)-dependent oxygenase superfamily protein
RN_000084	no	REFNigelle_000084.p1	AT5G20400.1	6.91e-99	2-oxoglutarate (2OG) and Fe(II)-dependent oxygenase superfamily protein [Source:UniProtKB/TrEMBL;Acc:Q84K82]	REFNigelle_000084.p1	Aqcoe7G376100.1.p	7e-155	AT5G20400.1	2-oxoglutarate (2OG) and Fe(II)-dependent oxygenase superfamily protein
RN_000085	no	ni	ni	ni	ni	ni	ni	ni	ni	ni
RN_000086	no	REFNigelle_000086.p1	AT2G23450.2	3.08e-118	WAKL14 description:Wall-associated receptor kinase-like 14 [Source:Q8RY67]	REFNigelle_000086.p1	Aqcoe5G205000.1.p	1e-137	AT2G23450.2	Protein kinase superfamily protein
RN_000087	no	ni	ni	ni	ni	ni	ni	ni	ni	ni
RN_000089	no	ni	ni	ni	ni	ni	ni	ni	ni	ni
RN_000091	no	REFNigelle_000091.p1	AT3G13020.1	1.93e-20	HAT transposon superfamily protein [Source:UniProtKB/TrEMBL;Acc:Q9LDK4]	REFNigelle_000091.p1	Aqcoe7G073800.2.p	3e-17	AT4G12300.1	cytochrome P450, family 706, subfamily A, polypeptide 4
RN_000092	no	REFNigelle_000092.p1	AT5G59240.1	1.21e-122	RPS8B description:40S ribosomal protein S8 [Source:Q0WSK1]	REFNigelle_000092.p1	Aqcoe5G004200.1.p	2e-120	AT5G59240.1	Ribosomal protein S8e family protein
RN_000093	no	ni	ni	ni	ni	ni	ni	ni	ni	ni
RN_000094	no	ni	ni	ni	ni	ni	ni	ni	ni	ni
RN_000095	no	ni	ni	ni	ni	ni	ni	ni	ni	ni
RN_000096	no	ni	ni	ni	ni	ni	ni	ni	ni	ni
RN_000097	no	ni	ni	ni	ni	ni	ni	ni	ni	ni
RN_000098	no	REFNigelle_000098.p1	AT3G47570.1	1.51e-165	Probable LRR receptor-like serine/threonine-protein kinase At3g47570 [Source:UniProtKB/Swiss-Prot;Acc:C0LGP4]	REFNigelle_000098.p1	Aqcoe7G315700.1.p	0	AT3G47570.1	Leucine-rich repeat protein kinase family protein
RN_000099	no	REFNigelle_000099.p1	AT5G09590.1	0	HSP70-10 description:Heat shock 70 kDa protein 10, mitochondrial [Source:Q9LDZ0]	REFNigelle_000099.p1	Aqcoe5G053800.1.p	0	AT5G09590.1	mitochondrial HSO70 2
RN_000100	no	REFNigelle_000100.p1	AT5G17670.1	1.2e-141	Alpha/beta-Hydrolases superfamily protein [Source:UniProtKB/TrEMBL;Acc:Q9FN84]	REFNigelle_000100.p1	Aqcoe1G115300.1.p	3e-168	AT5G17670.1	alpha/beta-Hydrolases superfamily protein
RN_000102	no	ni	ni	ni	ni	ni	ni	ni	ni	ni
RN_000103	no	REFNigelle_000103.p1	AT1G57790.1	0.00018	F-box/kelch-repeat protein At1g57790 [Source:UniProtKB/Swiss-Prot;Acc:Q9FVS1]	REFNigelle_000103.p1	Aqcoe6G178500.1.p	8e-14	AT1G57790.1	F-box family protein
RN_000104	no	REFNigelle_000104.p1	AT3G57520.1	0	RFS2 description:Probable galactinol--sucrose galactosyltransferase 2 [Source:Q94A08]	REFNigelle_000104.p1	Aqcoe2G020700.4.p	0	AT3G57520.1	seed imbibition 2
RN_000105	no	REFNigelle_000105.p1	AT3G57520.1	3.06e-55	RFS2 description:Probable galactinol--sucrose galactosyltransferase 2 [Source:Q94A08]	REFNigelle_000105.p1	Aqcoe2G020700.4.p	2e-78	AT3G57520.1	seed imbibition 2
RN_000107	no	REFNigelle_000107.p1	AT5G22460.1	7.26e-140	Alpha/beta-Hydrolases superfamily protein [Source:UniProtKB/TrEMBL;Acc:Q9FMQ5]	REFNigelle_000107.p1	Aqcoe2G140600.1.p	0	AT5G22460.2	alpha/beta-Hydrolases superfamily protein
RN_000108	no	ni	ni	ni	ni	REFNigelle_000108.p1	Aqcoe1G370900.1.p	5e-09	0	0
RN_000109	no	REFNigelle_000109.p1	AT3G24255.3	1.27e-30	RNA-directed DNA polymerase (Reverse transcriptase)-related family protein [Source:UniProtKB/TrEMBL;Acc:A0A1I9LSY4]	REFNigelle_000109.p1	Aqcoe3G174500.1.p	4e-26	AT3G09510.1	Ribonuclease H-like superfamily protein
RN_000110	no	REFNigelle_000110.p1	AT5G25090.1	2.02e-25	ENODL13 description:ENODL13 [Source:A0A178U9R8]	REFNigelle_000110.p1	Aqcoe7G356500.1.p	1e-32	AT2G25060.1	early nodulin-like protein 14
RN_000111	no	ni	ni	ni	ni	ni	ni	ni	ni	ni
RN_000112	no	ni	ni	ni	ni	ni	ni	ni	ni	ni
RN_000113	no	ni	ni	ni	ni	ni	ni	ni	ni	ni
RN_000114	no	ni	ni	ni	ni	ni	ni	ni	ni	ni
RN_000115	no	ni	ni	ni	ni	ni	ni	ni	ni	ni
RN_000119	no	REFNigelle_000119.p1	AT1G20370.1	0	F14O10.3 protein [Source:UniProtKB/TrEMBL;Acc:Q9LN29]	REFNigelle_000119.p1	Aqcoe6G230700.1.p	0	AT1G20370.1	Pseudouridine synthase family protein
RN_000120	no	REFNigelle_000120.p1	AT3G48670.3	1.63e-62	IDN2 description:Protein INVOLVED IN DE NOVO 2 [Source:Q8VZ79]	REFNigelle_000120.p1	Aqcoe5G471100.2.p	2e-135	AT1G15910.1	XH/XS domain-containing protein
RN_000121	no	REFNigelle_000121.p1	AT1G33710.1	1.49e-07	RNA-directed DNA polymerase (Reverse transcriptase)-related family protein [Source:UniProtKB/TrEMBL;Acc:Q3ED23]	REFNigelle_000121.p1	Aqcoe3G174500.1.p	7e-20	AT3G09510.1	Ribonuclease H-like superfamily protein
RN_000122	no	ni	ni	ni	ni	ni	ni	ni	ni	ni
RN_000123	no	ni	ni	ni	ni	ni	ni	ni	ni	ni
RN_000124	no	REFNigelle_000124.p2	AT1G09320.1	3.84e-21	Agenet domain-containing protein [Source:UniProtKB/TrEMBL;Acc:Q500V5]	REFNigelle_000124.p2	Aqcoe6G030700.5.p	1e-56	AT1G09320.1	agenet domain-containing protein
RN_000125	no	REFNigelle_000125.p1	AT2G21210.2	4.47e-31	SAUR-like auxin-responsive protein family [Source:TAIR;Acc:AT2G21210]	REFNigelle_000125.p1	Aqcoe5G228900.1.p	1e-51	AT2G21210.1	SAUR-like auxin-responsive protein family
RN_000126	no	REFNigelle_000126.p1	AT4G29250.1	3.35e-53	HXXXD-type acyl-transferase family protein [Source:UniProtKB/TrEMBL;Acc:F4JMX1]	REFNigelle_000126.p1	Aqcoe2G352700.2.p	0	AT4G29250.1	HXXXD-type acyl-transferase family protein
RN_000127	no	ni	ni	ni	ni	ni	ni	ni	ni	ni
RN_000128	no	REFNigelle_000128.p1	AT5G42250.1	1.33e-54	Alcohol dehydrogenase-like 7 [Source:UniProtKB/Swiss-Prot;Acc:Q9FH04]	REFNigelle_000128.p1	Aqcoe5G125300.1.p	8e-66	AT5G42250.1	Zinc-binding alcohol dehydrogenase family protein
RN_000130	no	REFNigelle_000130.p1	AT4G37040.1	0	MAP1D description:Methionine aminopeptidase [Source:A0A178UWL4]	REFNigelle_000130.p1	Aqcoe5G155800.1.p	0	AT4G37040.1	methionine aminopeptidase 1D
RN_000131	no	ni	ni	ni	ni	ni	ni	ni	ni	ni
RN_000132	no	ni	ni	ni	ni	ni	ni	ni	ni	ni
RN_000133	no	ni	ni	ni	ni	ni	ni	ni	ni	ni
RN_000134	no	ni	ni	ni	ni	ni	ni	ni	ni	ni
RN_000135	no	ni	ni	ni	ni	ni	ni	ni	ni	ni
RN_000137	yes	REFNigelle_000137.p1	AT3G24255.3	2.73e-22	RNA-directed DNA polymerase (Reverse transcriptase)-related family protein [Source:UniProtKB/TrEMBL;Acc:A0A1I9LSY4]	REFNigelle_000137.p1	Aqcoe3G174500.1.p	3e-22	AT3G09510.1	Ribonuclease H-like superfamily protein
RN_000140	yes	ni	ni	ni	ni	ni	ni	ni	ni	ni
RN_000142	no	ni	ni	ni	ni	ni	ni	ni	ni	ni
RN_000143	no	ni	ni	ni	ni	ni	ni	ni	ni	ni
RN_000144	no	ni	ni	ni	ni	ni	ni	ni	ni	ni
RN_000145	no	REFNigelle_000145.p1	AT5G16486.1	0.000211	RNA-directed DNA polymerase (Reverse transcriptase)-related family protein [Source:UniProtKB/TrEMBL;Acc:Q1G3F8]	REFNigelle_000145.p1	Aqcoe7G048600.1.p	7e-19	ATMG00310.1	RNA-directed DNA polymerase (reverse transcriptase)-related family protein
RN_000146	no	ni	ni	ni	ni	ni	ni	ni	ni	ni
RN_000147	no	REFNigelle_000147.p1	AT4G17565.1	5.63e-09	Putative F-box protein At4g17565 [Source:UniProtKB/Swiss-Prot;Acc:Q3EA00]	REFNigelle_000147.p1	Aqcoe7G401300.1.p	1e-29	AT2G17690.1	F-box family protein with a domain of unknown function (DUF295)
RN_000148	no	REFNigelle_000148.p1	AT1G34770.1	6.01e-107	CONTAINS InterPro DOMAIN/s: MAGE protein (InterPro:AT1G34770]	REFNigelle_000148.p1	Aqcoe2G378600.2.p	4e-132	AT1G34770.1	0
RN_000149	no	REFNigelle_000149.p1	AT5G23990.3	3.2e-109	ATFRO5 description:ferric reduction oxidase 5 [Source:AT5G23990]	REFNigelle_000149.p1	Aqcoe7G026000.1.p	1e-132	AT1G01580.1	ferric reduction oxidase 2
RN_000150	no	REFNigelle_000150.p1	AT1G09980.2	0	Putative serine esterase family protein [Source:UniProtKB/TrEMBL;Acc:Q8RXV4]	REFNigelle_000150.p1	Aqcoe6G040100.2.p	0	AT1G58350.1	Putative serine esterase family protein
RN_000151	no	ni	ni	ni	ni	ni	ni	ni	ni	ni
RN_000152	no	ni	ni	ni	ni	ni	ni	ni	ni	ni
RN_000153	no	ni	ni	ni	ni	ni	ni	ni	ni	ni
RN_000154	no	ni	ni	ni	ni	ni	ni	ni	ni	ni
RN_000155	yes	REFNigelle_000155.p1	AT3G21250.6	3.01e-54	MRP6 description:Multidrug resistance-associated protein 6 [Source:A0A1I9LPV5]	REFNigelle_000155.p1	Aqcoe7G413500.2.p	3e-78	AT3G21250.2	multidrug resistance-associated protein 6
RN_000158	no	ni	ni	ni	ni	ni	ni	ni	ni	ni
RN_000159	no	ni	ni	ni	ni	ni	ni	ni	ni	ni
RN_000160	no	ni	ni	ni	ni	ni	ni	ni	ni	ni
RN_000161	no	ni	ni	ni	ni	ni	ni	ni	ni	ni
RN_000163	no	ni	ni	ni	ni	ni	ni	ni	ni	ni
RN_000165	no	ni	ni	ni	ni	ni	ni	ni	ni	ni
RN_000166	no	REFNigelle_000166.p1	AT1G62590.1	7.3e-129	Pentatricopeptide repeat-containing protein At1g62590 [Source:UniProtKB/Swiss-Prot;Acc:Q9SXD8]	REFNigelle_000166.p1	Aqcoe5G371800.1.p	0	AT1G12775.1	Pentatricopeptide repeat (PPR) superfamily protein
RN_000167	no	ni	ni	ni	ni	ni	ni	ni	ni	ni
RN_000170	no	ni	ni	ni	ni	ni	ni	ni	ni	ni
RN_000171	no	ni	ni	ni	ni	ni	ni	ni	ni	ni
RN_000173	no	ni	ni	ni	ni	ni	ni	ni	ni	ni
RN_000174	no	ni	ni	ni	ni	ni	ni	ni	ni	ni
RN_000175	no	ni	ni	ni	ni	ni	ni	ni	ni	ni
RN_000176	no	ni	ni	ni	ni	ni	ni	ni	ni	ni
RN_000177	no	ni	ni	ni	ni	ni	ni	ni	ni	ni
RN_000178	no	REFNigelle_000178.p1	AT1G50940.1	0	ETFA description:Electron transfer flavoprotein subunit alpha, mitochondrial [Source:Q9C6I6]	REFNigelle_000178.p1	Aqcoe5G083500.1.p	1e-177	AT1G50940.1	electron transfer flavoprotein alpha
RN_000180	no	ni	ni	ni	ni	ni	ni	ni	ni	ni
RN_000181	no	ni	ni	ni	ni	ni	ni	ni	ni	ni
RN_000182	no	ni	ni	ni	ni	ni	ni	ni	ni	ni
RN_000183	no	ni	ni	ni	ni	ni	ni	ni	ni	ni
RN_000184	no	REFNigelle_000184.p3	AT4G02570.4	3.21e-48	CUL1 description:AT4G02570 protein [Source:B9DGE3]	REFNigelle_000184.p3	Aqcoe5G077000.2.p	4e-54	AT4G02570.3	cullin 1
RN_000185	no	REFNigelle_000185.p1	AT5G16930.1	0	AAA-type ATPase family protein [Source:UniProtKB/TrEMBL;Acc:Q8RXI0]	REFNigelle_000185.p1	Aqcoe7G343200.1.p	0	AT5G16930.1	AAA-type ATPase family protein
RN_000186	no	REFNigelle_000186.p1	AT2G16570.1	0	ASE1 description:Amidophosphoribosyltransferase 1, chloroplastic [Source:Q9SI61]	REFNigelle_000186.p1	Aqcoe3G153500.1.p	0	AT2G16570.1	GLN phosphoribosyl pyrophosphate amidotransferase 1
RN_000187	no	REFNigelle_000187.p1	AT4G39280.1	4.82e-169	Phenylalanine--tRNA ligase alpha subunit, cytoplasmic [Source:UniProtKB/Swiss-Prot;Acc:Q9T034]	REFNigelle_000187.p1	Aqcoe7G146100.1.p	6e-161	AT4G39280.2	phenylalanyl-tRNA synthetase, putative / phenylalanine--tRNA ligase, putative
RN_000188	yes	ni	ni	ni	ni	ni	ni	ni	ni	ni
RN_000189	no	REFNigelle_000189.p1	AT4G39280.2	0	Phenylalanine--tRNA ligase alpha subunit, cytoplasmic [Source:UniProtKB/Swiss-Prot;Acc:Q9T034]	REFNigelle_000189.p1	Aqcoe7G146100.1.p	0	AT4G39280.2	phenylalanyl-tRNA synthetase, putative / phenylalanine--tRNA ligase, putative
RN_000190	no	ni	ni	ni	ni	ni	ni	ni	ni	ni
RN_000191	no	ni	ni	ni	ni	ni	ni	ni	ni	ni
RN_000192	yes	ni	ni	ni	ni	ni	ni	ni	ni	ni
RN_000193	no	ni	ni	ni	ni	ni	ni	ni	ni	ni
RN_000194	yes	ni	ni	ni	ni	REFNigelle_000194.p1	Aqcoe2G436000.1.p	1e-10	AT1G65470.1	chromatin assembly factor-1 (FASCIATA1) (FAS1)
RN_000195	no	ni	ni	ni	ni	ni	ni	ni	ni	ni
RN_000196	no	REFNigelle_000196.p1	AT5G11500.1	2.64e-51	Coiled-coil protein [Source:UniProtKB/TrEMBL;Acc:Q9LYE1]	REFNigelle_000196.p1	Aqcoe7G404000.1.p	1e-54	AT5G11500.1	0
RN_000197	no	ni	ni	ni	ni	ni	ni	ni	ni	ni
RN_000198	no	ni	ni	ni	ni	ni	ni	ni	ni	ni
RN_000199	yes	ni	ni	ni	ni	ni	ni	ni	ni	ni
RN_000200	no	ni	ni	ni	ni	ni	ni	ni	ni	ni
RN_000201	no	ni	ni	ni	ni	ni	ni	ni	ni	ni
RN_000204	no	REFNigelle_000204.p1	AT3G27360.1	4.64e-95	HTR1 description:Histone H3 [Source:A0A178WG20]	REFNigelle_000204.p1	Aqcoe1G063900.1.p	2e-95	AT5G10390.1	Histone superfamily protein
RN_000205	no	REFNigelle_000205.p1	AT5G56590.1	0	Glucan endo-1,3-beta-glucosidase 13 [Source:UniProtKB/Swiss-Prot;Acc:Q9FJU9]	REFNigelle_000205.p1	Aqcoe7G420200.1.p	0	AT5G56590.1	O-Glycosyl hydrolases family 17 protein
RN_000206	no	REFNigelle_000206.p1	AT2G31170.1	1.77e-140	SYCO description:SYCO ARATH [Source:A0A178VWT1]	REFNigelle_000206.p1	Aqcoe6G061500.1.p	8e-152	AT5G38830.1	Cysteinyl-tRNA synthetase, class Ia family protein
RN_000207	no	ni	ni	ni	ni	ni	ni	ni	ni	ni
RN_000208	yes	ni	ni	ni	ni	ni	ni	ni	ni	ni
RN_000209	no	REFNigelle_000209.p1	AT5G33406.1	7.29e-33	HAT dimerization domain-containing protein / transposase-like protein [Source:UniProtKB/TrEMBL;Acc:F4KHA1]	REFNigelle_000209.p1	Aqcoe7G073800.1.p	3e-15	AT4G12300.1	cytochrome P450, family 706, subfamily A, polypeptide 4
RN_000210	no	REFNigelle_000210.p1	AT2G42850.1	4.03e-61	CYP718 description:CYP718 [Source:A0A178VUF2]	REFNigelle_000210.p1	Aqcoe1G406500.1.p	3e-130	AT5G36110.1	cytochrome P450, family 716, subfamily A, polypeptide 1
RN_000211	no	REFNigelle_000211.p1	AT4G23160.2	4.95e-55	CRK8 description:cysteine-rich RLK (RECEPTOR-like protein kinase) 8 [Source:AT4G23160]	ni	ni	ni	ni	ni
RN_000212	no	REFNigelle_000212.p1	AT3G07960.1	0	PIP5K6 description:Phosphatidylinositol 4-phosphate 5-kinase 6 [Source:Q9SFB8]	REFNigelle_000212.p1	Aqcoe1G042300.1.p	0	AT3G07960.1	Phosphatidylinositol-4-phosphate 5-kinase family protein
RN_000215	no	ni	ni	ni	ni	ni	ni	ni	ni	ni
RN_000216	no	ni	ni	ni	ni	ni	ni	ni	ni	ni
RN_000217	no	ni	ni	ni	ni	ni	ni	ni	ni	ni
RN_000218	no	REFNigelle_000218.p1	AT3G61470.1	7.17e-34	LHCA2 description:Photosystem I chlorophyll a/b-binding protein 2, chloroplastic [Source:Q9SYW8]	REFNigelle_000218.p1	Aqcoe3G200500.2.p	4e-36	AT3G61470.1	photosystem I light harvesting complex gene 2
RN_000219	no	ni	ni	ni	ni	ni	ni	ni	ni	ni
RN_000220	no	ni	ni	ni	ni	ni	ni	ni	ni	ni
RN_000222	no	REFNigelle_000222.p1	AT5G04120.1	1e-115	IPSP description:Metal-independent phosphoserine phosphatase [Source:F4KI56]	REFNigelle_000222.p1	Aqcoe1G045000.1.p	1e-162	AT5G04120.1	Phosphoglycerate mutase family protein
RN_000223	no	REFNigelle_000223.p1	AT5G11780.1	2.47e-59	SNF2 domain protein [Source:UniProtKB/TrEMBL;Acc:Q56Y63]	REFNigelle_000223.p1	Aqcoe7G429600.1.p	0	AT5G11780.1	0
RN_000225	no	ni	ni	ni	ni	REFNigelle_000225.p1	Aqcoe2G144100.1.p	3e-09	0	0
RN_000226	no	ni	ni	ni	ni	ni	ni	ni	ni	ni
RN_000227	no	ni	ni	ni	ni	ni	ni	ni	ni	ni
RN_000228	no	ni	ni	ni	ni	ni	ni	ni	ni	ni
RN_000229	no	REFNigelle_000229.p1	AT4G11260.1	2.65e-156	SGT1B description:SGT1B [Source:A0A178UX37]	REFNigelle_000229.p1	Aqcoe7G020600.1.p	0	AT4G11260.1	phosphatase-related
RN_000231	yes	ni	ni	ni	ni	ni	ni	ni	ni	ni
RN_000232	no	ni	ni	ni	ni	ni	ni	ni	ni	ni
RN_000233	no	REFNigelle_000233.p1	AT5G21105.3	2.48e-80	Plant L-ascorbate oxidase [Source:UniProtKB/TrEMBL;Acc:F4K6Z5]	REFNigelle_000233.p1	Aqcoe7G108200.1.p	1e-104	AT5G21105.1	Plant L-ascorbate oxidase
RN_000234	yes	ni	ni	ni	ni	ni	ni	ni	ni	ni
RN_000235	no	ni	ni	ni	ni	ni	ni	ni	ni	ni
RN_000236	no	ni	ni	ni	ni	ni	ni	ni	ni	ni
RN_000237	no	ni	ni	ni	ni	ni	ni	ni	ni	ni
RN_000238	no	ni	ni	ni	ni	ni	ni	ni	ni	ni
RN_000239	no	REFNigelle_000239.p1	AT3G06240.1	3.87e-24	F-box/kelch-repeat protein At3g06240 [Source:UniProtKB/Swiss-Prot;Acc:Q8GXC7]	REFNigelle_000239.p1	Aqcoe2G063800.1.p	6e-66	AT4G12560.1	F-box and associated interaction domains-containing protein
RN_000242	no	ni	ni	ni	ni	ni	ni	ni	ni	ni
RN_000244	no	ni	ni	ni	ni	ni	ni	ni	ni	ni
RN_000245	no	ni	ni	ni	ni	ni	ni	ni	ni	ni
RN_000246	no	ni	ni	ni	ni	ni	ni	ni	ni	ni
RN_000247	no	ni	ni	ni	ni	ni	ni	ni	ni	ni
RN_000248	no	ni	ni	ni	ni	ni	ni	ni	ni	ni
RN_000249	no	ni	ni	ni	ni	ni	ni	ni	ni	ni
RN_000252	no	ni	ni	ni	ni	REFNigelle_000252.p1	Aqcoe3G351200.1.p	6e-07	AT2G02520.1	RNA-directed DNA polymerase (reverse transcriptase)-related family protein
RN_000253	no	ni	ni	ni	ni	ni	ni	ni	ni	ni
RN_000254	no	REFNigelle_000254.p1	AT1G13250.1	8.33e-63	GATL3 description:Probable galacturonosyltransferase-like 3 [Source:Q0V7R1]	REFNigelle_000254.p1	Aqcoe3G396700.1.p	5e-77	AT1G13250.1	galacturonosyltransferase-like 3
RN_000255	yes	ni	ni	ni	ni	ni	ni	ni	ni	ni
RN_000256	no	ni	ni	ni	ni	ni	ni	ni	ni	ni
RN_000257	no	REFNigelle_000257.p1	AT1G63370.1	4.6e-115	Flavin-containing monooxygenase FMO GS-OX-like 5 [Source:UniProtKB/Swiss-Prot;Acc:Q9C8U0]	REFNigelle_000257.p1	Aqcoe7G079700.1.p	7e-138	AT1G63370.1	Flavin-binding monooxygenase family protein
RN_000258	no	REFNigelle_000258.p1	AT3G57400.1	5.33e-90	Transmembrane protein [Source:UniProtKB/TrEMBL;Acc:Q9M2K7]	REFNigelle_000258.p1	Aqcoe1G025900.1.p	3e-148	AT3G57400.1	0
RN_000259	no	REFNigelle_000259.p1	AT4G27620.3	5.87e-76	At4g27620 [Source:UniProtKB/TrEMBL;Acc:Q56Y15]	REFNigelle_000259.p1	Aqcoe1G287700.1.p	1e-113	AT4G27610.2	0
RN_000260	no	REFNigelle_000260.p1	AT3G42723.1	3.78e-12	ATP binding / aminoacyl-tRNA ligase/ nucleotide binding protein [Source:UniProtKB/TrEMBL;Acc:F4IWM0]	REFNigelle_000260.p1	Aqcoe7G257100.1.p	6e-08	ATMG00860.1	DNA/RNA polymerases superfamily protein
RN_000261	no	REFNigelle_000261.p1	AT3G42170.2	4.79e-07	HAT description:DAYSLEEPER [Source:A0A178VJS5]	ni	ni	ni	ni	ni
RN_000263	no	REFNigelle_000263.p1	AT4G00155.1	2.17e-09	Retrotransposon Gag (Fragment) [Source:UniProtKB/TrEMBL;Acc:A0A1P8B386]	ni	ni	ni	ni	ni
RN_000264	no	ni	ni	ni	ni	ni	ni	ni	ni	ni
RN_000265	no	REFNigelle_000265.p1	AT5G62990.1	4.37e-65	emb1692 description:Ubiquitin carboxyl-terminal hydrolase family protein [Source:Q9FM53]	REFNigelle_000265.p2	Aqcoe2G419800.1.p	1e-98	AT5G62990.1	Ubiquitin carboxyl-terminal hydrolase family protein
RN_000266	no	ni	ni	ni	ni	ni	ni	ni	ni	ni
RN_000267	no	REFNigelle_000267.p1	AT3G27360.1	1.36e-94	HTR1 description:Histone H3 [Source:A0A178WG20]	REFNigelle_000267.p1	Aqcoe1G063900.1.p	1e-94	AT5G10390.1	Histone superfamily protein
RN_000268	no	REFNigelle_000268.p1	AT3G27360.1	1.97e-95	HTR1 description:Histone H3 [Source:A0A178WG20]	REFNigelle_000268.p1	Aqcoe1G063900.1.p	5e-81	AT5G10390.1	Histone superfamily protein
RN_000269	no	ni	ni	ni	ni	REFNigelle_000269.p1	Aqcoe7G389700.1.p	3e-63	AT2G24960.2	0
RN_000270	no	REFNigelle_000270.p2	AT2G24960.1	0.000427	Myb/SANT-like DNA-binding domain protein [Source:UniProtKB/TrEMBL;Acc:Q9SK37]	REFNigelle_000270.p2	Aqcoe5G401500.1.p	6e-32	AT2G24960.1	0
RN_000272	no	ni	ni	ni	ni	ni	ni	ni	ni	ni
RN_000273	no	ni	ni	ni	ni	REFNigelle_000273.p2	Aqcoe3G197400.1.p	7e-34	0	0
RN_000274	no	ni	ni	ni	ni	REFNigelle_000274.p2	Aqcoe3G197400.1.p	7e-34	0	0
RN_000278	no	REFNigelle_000278.p1	AT1G63780.1	2.77e-127	IMP4 description:IMP4 [Source:A0A178WDJ3]	REFNigelle_000278.p1	Aqcoe7G060300.1.p	3e-142	AT1G63780.1	Ribosomal RNA processing Brix domain protein
RN_000279	no	ni	ni	ni	ni	ni	ni	ni	ni	ni
RN_000280	no	REFNigelle_000280.p1	AT3G53700.1	3.71e-38	MEE40 description:Pentatricopeptide repeat-containing protein At3g53700, chloroplastic [Source:Q9LFF1]	REFNigelle_000280.p1	Aqcoe3G377800.1.p	0	AT5G65560.1	Pentatricopeptide repeat (PPR) superfamily protein
RN_000281	no	ni	ni	ni	ni	ni	ni	ni	ni	ni
RN_000282	no	ni	ni	ni	ni	ni	ni	ni	ni	ni
RN_000284	yes	ni	ni	ni	ni	ni	ni	ni	ni	ni
RN_000287	no	REFNigelle_000287.p1	AT5G01120.1	6.81e-66	Uncharacterized protein F7J8_100 [Source:UniProtKB/TrEMBL;Acc:Q9LFC4]	REFNigelle_000287.p1	Aqcoe1G088300.1.p	7e-109	AT3G09140.2	Protein of unknown function (DUF674)
RN_000288	no	ni	ni	ni	ni	ni	ni	ni	ni	ni
RN_000289	no	ni	ni	ni	ni	ni	ni	ni	ni	ni
RN_000291	no	REFNigelle_000291.p1	AT5G56890.1	0	Protein kinase superfamily protein [Source:UniProtKB/TrEMBL;Acc:F4K946]	REFNigelle_000291.p1	Aqcoe7G127500.1.p	0	AT5G56890.1	Protein kinase superfamily protein
RN_000292	no	REFNigelle_000292.p1	AT5G56890.1	0	Protein kinase superfamily protein [Source:UniProtKB/TrEMBL;Acc:F4K946]	REFNigelle_000292.p1	Aqcoe7G127500.2.p	0	AT5G56890.1	Protein kinase superfamily protein
RN_000293	no	REFNigelle_000293.p1	AT2G11520.1	1.48e-172	CRCK3 description:Calmodulin-binding receptor-like cytoplasmic kinase 3 [Source:Q9ASQ5]	REFNigelle_000293.p1	Aqcoe7G378400.5.p	0	AT2G11520.1	calmodulin-binding receptor-like cytoplasmic kinase 3
RN_000294	no	REFNigelle_000294.p1	AT2G11520.1	1.48e-172	CRCK3 description:Calmodulin-binding receptor-like cytoplasmic kinase 3 [Source:Q9ASQ5]	REFNigelle_000294.p1	Aqcoe7G378400.5.p	0	AT2G11520.1	calmodulin-binding receptor-like cytoplasmic kinase 3
RN_000295	no	ni	ni	ni	ni	ni	ni	ni	ni	ni
RN_000297	no	REFNigelle_000297.p1	AT5G19440.1	5.83e-139	At5g19440 [Source:UniProtKB/TrEMBL;Acc:Q29Q34]	REFNigelle_000297.p1	Aqcoe1G024500.1.p	5e-144	AT5G19440.1	NAD(P)-binding Rossmann-fold superfamily protein
RN_000298	no	ni	ni	ni	ni	ni	ni	ni	ni	ni
RN_000299	no	REFNigelle_000299.p1	AT2G18950.1	1.52e-99	HPT1 description:Homogentisate phytyltransferase 1, chloroplastic [Source:Q8VWJ1]	REFNigelle_000299.p1	Aqcoe4G314300.1.p	4e-97	AT2G18950.1	homogentisate phytyltransferase 1
RN_000300	no	REFNigelle_000300.p1	AT5G55150.1	3.67e-18	Putative F-box protein At5g55150 [Source:UniProtKB/Swiss-Prot;Acc:Q9FLP7]	REFNigelle_000300.p1	Aqcoe7G406300.1.p	1e-129	AT5G55150.1	Protein of unknown function (DUF295)
RN_000301	no	ni	ni	ni	ni	ni	ni	ni	ni	ni
RN_000302	no	ni	ni	ni	ni	ni	ni	ni	ni	ni
RN_000303	no	ni	ni	ni	ni	REFNigelle_000303.p1	Aqcoe4G034200.1.p	2e-16	AT4G32300.1	S-domain-2 5
RN_000305	no	REFNigelle_000305.p1	AT3G25720.1	7.12e-05	RNA-directed DNA polymerase (Reverse transcriptase)-related family protein [Source:UniProtKB/TrEMBL;Acc:Q3EB05]	REFNigelle_000305.p1	Aqcoe6G308000.1.p	3e-16	AT4G04650.1	RNA-directed DNA polymerase (reverse transcriptase)-related family protein
RN_000306	no	REFNigelle_000306.p1	AT5G39450.1	0	F-box protein At5g39450 [Source:UniProtKB/Swiss-Prot;Acc:Q8RWD6]	REFNigelle_000306.p1	Aqcoe5G281100.1.p	0	AT5G63910.1	farnesylcysteine lyase
RN_000307	no	REFNigelle_000307.p1	AT5G39450.1	0	F-box protein At5g39450 [Source:UniProtKB/Swiss-Prot;Acc:Q8RWD6]	REFNigelle_000307.p1	Aqcoe5G281100.1.p	0	AT5G63910.1	farnesylcysteine lyase
RN_000308	no	REFNigelle_000308.p1	AT5G39450.1	0	F-box protein At5g39450 [Source:UniProtKB/Swiss-Prot;Acc:Q8RWD6]	REFNigelle_000308.p1	Aqcoe5G281100.1.p	0	AT5G63910.1	farnesylcysteine lyase
RN_000309	no	ni	ni	ni	ni	ni	ni	ni	ni	ni
RN_000310	no	REFNigelle_000310.p2	ATMG00860.1	0.000209	ORF158 description:Uncharacterized mitochondrial protein AtMg00860 [Source:P92523]	REFNigelle_000310.p3	Aqcoe6G275700.1.p	2e-07	0	0
RN_000311	no	ni	ni	ni	ni	ni	ni	ni	ni	ni
RN_000312	no	ni	ni	ni	ni	ni	ni	ni	ni	ni
RN_000314	no	REFNigelle_000314.p1	AT1G06240.1	4.22e-171	Uncharacterized protein At1g06240 [Source:UniProtKB/TrEMBL;Acc:Q8H109]	REFNigelle_000314.p1	Aqcoe1G282700.1.p	0	AT1G06240.1	Protein of unknown function DUF455
RN_000315	no	ni	ni	ni	ni	ni	ni	ni	ni	ni
RN_000316	yes	REFNigelle_000316.p1	AT1G27200.1	0	DUF23/GT0 (Fragment) [Source:UniProtKB/TrEMBL;Acc:I1VCA1]	REFNigelle_000316.p1	Aqcoe3G313700.1.p	0	AT1G27200.1	Domain of unknown function (DUF23)
RN_000318	no	ni	ni	ni	ni	ni	ni	ni	ni	ni
RN_000319	no	REFNigelle_000319.p1	AT3G24255.4	8.12e-37	RNA-directed DNA polymerase (Reverse transcriptase)-related family protein [Source:UniProtKB/TrEMBL;Acc:A0A1I9LSY4]	REFNigelle_000319.p1	Aqcoe3G131700.1.p	1e-27	AT1G60720.1	RNA-directed DNA polymerase (reverse transcriptase)-related family protein
RN_000321	no	REFNigelle_000321.p1	AT2G45440.1	0	DHDPS2 description:Putative dihydrodipicolinate synthase [Source:Q0WSN6]	REFNigelle_000321.p1	Aqcoe7G063900.2.p	0	AT2G45440.1	dihydrodipicolinate synthase
RN_000322	no	REFNigelle_000322.p1	AT2G45440.1	0	DHDPS2 description:Putative dihydrodipicolinate synthase [Source:Q0WSN6]	REFNigelle_000322.p1	Aqcoe7G063900.2.p	0	AT2G45440.1	dihydrodipicolinate synthase
RN_000323	no	REFNigelle_000323.p1	AT2G45440.1	2.2e-170	DHDPS2 description:Putative dihydrodipicolinate synthase [Source:Q0WSN6]	REFNigelle_000323.p1	Aqcoe7G063900.1.p	2e-180	AT2G45440.1	dihydrodipicolinate synthase
RN_000324	no	REFNigelle_000324.p1	AT3G45070.3	3.67e-107	Sulfotransferase [Source:UniProtKB/TrEMBL;Acc:A0A1I9LRV5]	REFNigelle_000324.p1	Aqcoe3G376500.1.p	5e-170	AT3G45070.1	P-loop containing nucleoside triphosphate hydrolases superfamily protein
RN_000325	yes	ni	ni	ni	ni	ni	ni	ni	ni	ni
RN_000326	no	REFNigelle_000326.p1	AT3G20280.1	9.43e-67	RING/FYVE/PHD zinc finger superfamily protein [Source:UniProtKB/TrEMBL;Acc:A8MQI3]	REFNigelle_000326.p1	Aqcoe4G286600.1.p	0	AT1G50620.1	RING/FYVE/PHD zinc finger superfamily protein
RN_000327	no	REFNigelle_000327.p1	AT3G04760.1	5.33e-122	Pentatricopeptide repeat-containing protein At3g04760, chloroplastic [Source:UniProtKB/Swiss-Prot;Acc:Q9SR00]	REFNigelle_000327.p1	Aqcoe5G023800.1.p	5e-143	AT3G04760.1	Pentatricopeptide repeat (PPR-like) superfamily protein
RN_000328	yes	REFNigelle_000328.p1	AT3G04760.2	1.67e-125	Pentatricopeptide repeat-containing protein At3g04760, chloroplastic [Source:UniProtKB/Swiss-Prot;Acc:Q9SR00]	REFNigelle_000328.p1	Aqcoe5G023800.1.p	5e-142	AT3G04760.1	Pentatricopeptide repeat (PPR-like) superfamily protein
RN_000329	yes	REFNigelle_000329.p1	AT3G04760.2	2.31e-125	Pentatricopeptide repeat-containing protein At3g04760, chloroplastic [Source:UniProtKB/Swiss-Prot;Acc:Q9SR00]	REFNigelle_000329.p1	Aqcoe5G023800.1.p	5e-142	AT3G04760.1	Pentatricopeptide repeat (PPR-like) superfamily protein
RN_000330	no	ni	ni	ni	ni	ni	ni	ni	ni	ni
RN_000331	no	ni	ni	ni	ni	ni	ni	ni	ni	ni
RN_000332	no	REFNigelle_000332.p1	AT1G12775.1	2.05e-42	Pentatricopeptide repeat-containing protein At1g12775, mitochondrial [Source:UniProtKB/Swiss-Prot;Acc:Q9LPX2]	REFNigelle_000332.p1	Aqcoe2G118200.1.p	8e-40	AT1G12700.1	ATP binding;nucleic acid binding;helicases
RN_000333	no	REFNigelle_000333.p1	AT1G63080.3	3.67e-36	Pentatricopeptide repeat-containing protein At1g63080, mitochondrial [Source:UniProtKB/Swiss-Prot;Acc:Q9CAN5]	REFNigelle_000333.p1	Aqcoe4G132600.1.p	1e-68	AT1G62910.1	Pentatricopeptide repeat (PPR) superfamily protein
RN_000334	no	ni	ni	ni	ni	ni	ni	ni	ni	ni
RN_000335	yes	ni	ni	ni	ni	ni	ni	ni	ni	ni
RN_000337	no	ni	ni	ni	ni	ni	ni	ni	ni	ni
RN_000338	no	ni	ni	ni	ni	ni	ni	ni	ni	ni
RN_000339	yes	ni	ni	ni	ni	ni	ni	ni	ni	ni
RN_000340	yes	ni	ni	ni	ni	ni	ni	ni	ni	ni
RN_000341	no	REFNigelle_000341.p1	AT3G59670.1	5.14e-33	Elongation factor [Source:UniProtKB/TrEMBL;Acc:Q56XZ5]	REFNigelle_000341.p1	Aqcoe1G027100.1.p	2e-112	AT3G59670.1	0
RN_000342	no	REFNigelle_000342.p1	AT5G07360.3	0	Amidase family protein [Source:UniProtKB/TrEMBL;Acc:F4K6N3]	REFNigelle_000342.p1	Aqcoe5G320100.1.p	0	AT5G07360.1	Amidase family protein
RN_000343	no	REFNigelle_000343.p1	AT5G07360.3	0	Amidase family protein [Source:UniProtKB/TrEMBL;Acc:F4K6N3]	REFNigelle_000343.p1	Aqcoe5G320100.1.p	0	AT5G07360.1	Amidase family protein
RN_000344	no	ni	ni	ni	ni	ni	ni	ni	ni	ni
RN_000345	no	REFNigelle_000345.p1	AT3G06400.1	0	CHR11 description:Chromatin-remodeling complex ATPase [Source:F4JAV9]	REFNigelle_000345.p1	Aqcoe2G309300.1.p	0	AT5G18620.2	chromatin remodeling factor17
RN_000346	no	REFNigelle_000346.p1	AT5G18620.2	1.56e-127	CHR17 description:Chromatin-remodeling complex ATPase [Source:F4JY25]	REFNigelle_000346.p1	Aqcoe5G076600.1.p	6e-128	AT3G06400.2	chromatin-remodeling protein 11
RN_000347	no	REFNigelle_000347.p1	AT5G24670.1	7.92e-141	Cytidine/deoxycytidylate deaminase family protein [Source:UniProtKB/TrEMBL;Acc:F4KH85]	REFNigelle_000347.p1	Aqcoe1G027000.1.p	0	AT5G24670.1	Cytidine/deoxycytidylate deaminase family protein
RN_000349	no	ni	ni	ni	ni	REFNigelle_000349.p1	Aqcoe2G184100.1.p	0.0004	0	0
RN_000351	no	ni	ni	ni	ni	ni	ni	ni	ni	ni
RN_000352	yes	ni	ni	ni	ni	ni	ni	ni	ni	ni
RN_000353	no	REFNigelle_000353.p1	AT1G15880.1	1.52e-125	GOS11 description:Golgi SNAP receptor complex member 1-1 [Source:Q9LMP7]	REFNigelle_000353.p1	Aqcoe7G363400.1.p	1e-145	AT1G15880.1	golgi snare 11
RN_000354	no	REFNigelle_000354.p1	AT1G15880.1	1.52e-125	GOS11 description:Golgi SNAP receptor complex member 1-1 [Source:Q9LMP7]	REFNigelle_000354.p1	Aqcoe7G363400.1.p	1e-145	AT1G15880.1	golgi snare 11
RN_000355	no	ni	ni	ni	ni	ni	ni	ni	ni	ni
RN_000357	no	ni	ni	ni	ni	ni	ni	ni	ni	ni
RN_000358	no	ni	ni	ni	ni	ni	ni	ni	ni	ni
RN_000359	no	REFNigelle_000359.p1	AT5G20660.1	0	24 kDa vacuolar protein-like [Source:UniProtKB/TrEMBL;Acc:Q0WVZ7]	REFNigelle_000359.p1	Aqcoe2G170700.1.p	0	AT5G20660.1	Zn-dependent exopeptidases superfamily protein
RN_000360	no	ni	ni	ni	ni	ni	ni	ni	ni	ni
RN_000361	no	ni	ni	ni	ni	ni	ni	ni	ni	ni
RN_000362	no	ni	ni	ni	ni	ni	ni	ni	ni	ni
RN_000363	no	REFNigelle_000363.p1	AT1G78850.1	2.63e-75	EP1-like glycoprotein 3 [Source:UniProtKB/Swiss-Prot;Acc:Q9ZVA4]	REFNigelle_000363.p1	Aqcoe4G057400.1.p	2e-121	AT1G78850.1	D-mannose binding lectin protein with Apple-like carbohydrate-binding domain
RN_000364	no	ni	ni	ni	ni	ni	ni	ni	ni	ni
RN_000365	no	ni	ni	ni	ni	ni	ni	ni	ni	ni
RN_000366	no	ni	ni	ni	ni	ni	ni	ni	ni	ni
RN_000368	no	ni	ni	ni	ni	ni	ni	ni	ni	ni
RN_000369	no	ni	ni	ni	ni	ni	ni	ni	ni	ni
RN_000370	no	ni	ni	ni	ni	ni	ni	ni	ni	ni
RN_000372	no	ni	ni	ni	ni	ni	ni	ni	ni	ni
RN_000375	no	REFNigelle_000375.p1	AT3G25980.1	1.99e-90	MAD2 description:Mitotic spindle checkpoint protein MAD2 [Source:Q9LU93]	REFNigelle_000375.p1	Aqcoe5G374800.1.p	8e-96	AT3G25980.1	DNA-binding HORMA family protein
RN_000376	no	REFNigelle_000376.p1	AT2G22650.1	4.63e-175	FAD-dependent oxidoreductase family protein [Source:UniProtKB/TrEMBL;Acc:Q5S4X7]	REFNigelle_000376.p1	Aqcoe7G366500.1.p	0	AT2G22650.1	FAD-dependent oxidoreductase family protein
RN_000378	no	REFNigelle_000378.p1	AT1G22800.1	1.02e-171	Putative methyltransferase At1g22800, mitochondrial [Source:UniProtKB/Swiss-Prot;Acc:O80543]	REFNigelle_000378.p1	Aqcoe2G392500.2.p	0	AT1G22800.1	S-adenosyl-L-methionine-dependent methyltransferases superfamily protein
RN_000379	no	REFNigelle_000379.p1	AT4G25810.1	4.68e-153	XTH23 description:Probable xyloglucan endotransglucosylase/hydrolase protein 23 [Source:Q38910]	REFNigelle_000379.p1	Aqcoe6G159700.1.p	8e-168	AT4G25810.1	xyloglucan endotransglycosylase 6
RN_000380	no	ni	ni	ni	ni	ni	ni	ni	ni	ni
RN_000381	no	REFNigelle_000381.p1	AT2G02090.1	0	ETL1 description:ETL1 [Source:A0A178VWA6]	REFNigelle_000381.p1	Aqcoe3G427400.1.p	0	AT2G02090.1	SNF2 domain-containing protein / helicase domain-containing protein
RN_000383	no	ni	ni	ni	ni	ni	ni	ni	ni	ni
RN_000384	no	REFNigelle_000384.p1	AT1G55290.1	3.88e-151	F6'H2 description:Feruloyl CoA ortho-hydroxylase 2 [Source:Q9C899]	REFNigelle_000384.p1	Aqcoe1G051200.1.p	9e-159	AT3G13610.1	2-oxoglutarate (2OG) and Fe(II)-dependent oxygenase superfamily protein
RN_000385	no	ni	ni	ni	ni	ni	ni	ni	ni	ni
RN_000388	no	REFNigelle_000388.p1	AT4G15090.1	2.67e-11	FAR1 description:Protein FAR-RED IMPAIRED RESPONSE 1 [Source:Q9SWG3]	REFNigelle_000388.p1	Aqcoe1G355700.3.p	3e-122	AT4G38180.1	FAR1-related sequence 5
RN_000389	no	ni	ni	ni	ni	ni	ni	ni	ni	ni
RN_000390	no	ni	ni	ni	ni	ni	ni	ni	ni	ni
RN_000391	no	ni	ni	ni	ni	ni	ni	ni	ni	ni
RN_000392	no	ni	ni	ni	ni	ni	ni	ni	ni	ni
RN_000393	no	REFNigelle_000393.p1	AT5G51200.2	0	Protein of unknown function (DUF3414) [Source:TAIR;Acc:AT5G51200]	REFNigelle_000393.p1	Aqcoe7G268200.3.p	0	AT5G51200.1	Protein of unknown function (DUF3414)
RN_000396	no	ni	ni	ni	ni	ni	ni	ni	ni	ni
RN_000397	no	ni	ni	ni	ni	ni	ni	ni	ni	ni
RN_000398	no	REFNigelle_000398.p1	AT2G26160.1	8.57e-08	F-box protein At2g26160 [Source:UniProtKB/Swiss-Prot;Acc:Q1PEZ8]	REFNigelle_000398.p1	Aqcoe3G350000.1.p	2e-81	AT1G49360.1	F-box family protein
RN_000399	no	ni	ni	ni	ni	ni	ni	ni	ni	ni
RN_000400	no	REFNigelle_000400.p1	AT5G23060.1	5.61e-47	CAS description:Calcium sensing receptor, chloroplastic [Source:Q9FN48]	REFNigelle_000400.p1	Aqcoe3G052400.1.p	7e-55	AT5G23060.1	calcium sensing receptor
RN_000403	no	ni	ni	ni	ni	ni	ni	ni	ni	ni
RN_000404	no	ni	ni	ni	ni	ni	ni	ni	ni	ni
RN_000405	no	REFNigelle_000405.p1	AT3G59140.1	0	ABCC10 description:ABC transporter C family member 10 [Source:Q9LYS2]	REFNigelle_000405.p1	Aqcoe7G022500.3.p	0	AT3G59140.1	multidrug resistance-associated protein 14
RN_000407	no	REFNigelle_000407.p1	AT1G07890.2	1.72e-153	APX1 description:MEE6 [Source:A0A178W5I1]	REFNigelle_000407.p1	Aqcoe2G167300.1.p	4e-140	AT1G07890.3	ascorbate peroxidase 1
RN_000408	no	REFNigelle_000408.p1	AT3G24255.4	9.19e-40	RNA-directed DNA polymerase (Reverse transcriptase)-related family protein [Source:UniProtKB/TrEMBL;Acc:A0A1I9LSY4]	REFNigelle_000408.p2	Aqcoe2G128200.1.p	2e-26	0	0
RN_000409	no	ni	ni	ni	ni	ni	ni	ni	ni	ni
RN_000410	no	ni	ni	ni	ni	ni	ni	ni	ni	ni
RN_000412	no	ni	ni	ni	ni	ni	ni	ni	ni	ni
RN_000414	no	ni	ni	ni	ni	ni	ni	ni	ni	ni
RN_000415	yes	ni	ni	ni	ni	ni	ni	ni	ni	ni
RN_000416	no	REFNigelle_000416.p1	AT5G02560.1	2.38e-75	HTA12 description:Histone H2A [Source:F4KCF4]	REFNigelle_000416.p1	Aqcoe1G470800.1.p	4e-51	AT5G02560.1	histone H2A 12
RN_000417	no	ni	ni	ni	ni	ni	ni	ni	ni	ni
RN_000418	no	ni	ni	ni	ni	ni	ni	ni	ni	ni
RN_000419	no	ni	ni	ni	ni	ni	ni	ni	ni	ni
RN_000420	no	ni	ni	ni	ni	ni	ni	ni	ni	ni
RN_000421	no	ni	ni	ni	ni	ni	ni	ni	ni	ni
RN_000422	no	REFNigelle_000422.p1	AT1G48160.2	1.9e-56	SRP19 description:Signal recognition particle 19 kDa protein [Source:Q943Z6]	REFNigelle_000422.p1	Aqcoe7G444300.1.p	7e-71	AT1G48160.1	signal recognition particle 19 kDa protein, putative / SRP19, putative
RN_000423	no	REFNigelle_000423.p1	AT1G48160.2	1.08e-57	SRP19 description:Signal recognition particle 19 kDa protein [Source:Q943Z6]	REFNigelle_000423.p1	Aqcoe7G444300.1.p	7e-65	AT1G48160.1	signal recognition particle 19 kDa protein, putative / SRP19, putative
RN_000424	no	REFNigelle_000424.p1	AT3G05320.1	5e-121	OFUT23 description:O-fucosyltransferase 23 [Source:Q9MA87]	REFNigelle_000424.p1	Aqcoe3G436300.2.p	4e-165	AT3G05320.1	O-fucosyltransferase family protein
RN_000425	no	ni	ni	ni	ni	ni	ni	ni	ni	ni
RN_000426	no	ni	ni	ni	ni	ni	ni	ni	ni	ni
RN_000427	no	ni	ni	ni	ni	ni	ni	ni	ni	ni
RN_000428	no	REFNigelle_000428.p1	AT3G06240.1	4.97e-30	F-box/kelch-repeat protein At3g06240 [Source:UniProtKB/Swiss-Prot;Acc:Q8GXC7]	REFNigelle_000428.p1	Aqcoe1G435600.1.p	1e-67	AT3G06240.1	F-box family protein
RN_000429	no	ni	ni	ni	ni	ni	ni	ni	ni	ni
RN_000430	no	ni	ni	ni	ni	ni	ni	ni	ni	ni
RN_000434	no	REFNigelle_000434.p1	AT5G04885.2	7.43e-15	Glycosyl hydrolase family protein [Source:TAIR;Acc:AT5G04885]	REFNigelle_000434.p1	Aqcoe1G069100.1.p	7e-15	AT5G20950.1	Glycosyl hydrolase family protein
RN_000435	no	REFNigelle_000435.p1	AT4G05200.1	7.85e-92	CRK25 description:cysteine-rich RLK (RECEPTOR-like protein kinase) 25 [Source:AT4G05200]	REFNigelle_000435.p1	Aqcoe1G365600.1.p	8e-165	AT4G05200.1	cysteine-rich RLK (RECEPTOR-like protein kinase) 25
RN_000436	no	REFNigelle_000436.p1	AT2G47520.1	2.38e-48	ERF071 description:Ethylene-responsive transcription factor ERF071 [Source:O22259]	REFNigelle_000436.p1	Aqcoe6G195700.1.p	1e-59	AT2G47520.1	Integrase-type DNA-binding superfamily protein
RN_000437	no	ni	ni	ni	ni	ni	ni	ni	ni	ni
RN_000438	no	REFNigelle_000438.p1	AT4G04650.1	4.35e-12	AT4g04650 protein [Source:UniProtKB/TrEMBL;Acc:Q9S9V5]	REFNigelle_000438.p1	Aqcoe3G174500.1.p	3e-20	AT3G09510.1	Ribonuclease H-like superfamily protein
RN_000439	no	ni	ni	ni	ni	ni	ni	ni	ni	ni
RN_000440	yes	ni	ni	ni	ni	ni	ni	ni	ni	ni
RN_000441	no	ni	ni	ni	ni	ni	ni	ni	ni	ni
RN_000442	no	ni	ni	ni	ni	ni	ni	ni	ni	ni
RN_000443	no	REFNigelle_000443.p3	AT4G15030.1	1.11e-44	Folate-sensitive fragile site protein [Source:UniProtKB/TrEMBL;Acc:F4JJC3]	REFNigelle_000443.p3	Aqcoe1G032400.1.p	6e-61	AT4G15030.1	0
RN_000444	no	ni	ni	ni	ni	ni	ni	ni	ni	ni
RN_000445	no	ni	ni	ni	ni	ni	ni	ni	ni	ni
RN_000447	no	REFNigelle_000447.p1	AT3G28480.1	4.97e-143	Oxoglutarate/iron-dependent oxygenase [Source:UniProtKB/TrEMBL;Acc:F4J0A6]	REFNigelle_000447.p1	Aqcoe3G316900.1.p	4e-164	AT3G28480.1	Oxoglutarate/iron-dependent oxygenase
RN_000448	no	REFNigelle_000448.p1	AT3G06250.3	9.51e-09	FRS7 description:Protein FAR1-RELATED SEQUENCE 7 [Source:Q9M8J3]	REFNigelle_000448.p1	Aqcoe1G355700.3.p	1e-68	AT4G38180.1	FAR1-related sequence 5
RN_000450	no	ni	ni	ni	ni	ni	ni	ni	ni	ni
RN_000451	no	ni	ni	ni	ni	ni	ni	ni	ni	ni
RN_000453	no	ni	ni	ni	ni	ni	ni	ni	ni	ni
RN_000454	no	REFNigelle_000454.p1	AT5G01320.1	0	PDC4 description:Pyruvate decarboxylase 4 [Source:Q9M040]	REFNigelle_000454.p1	Aqcoe1G283000.1.p	0	AT5G01320.1	Thiamine pyrophosphate dependent pyruvate decarboxylase family protein
RN_000455	no	ni	ni	ni	ni	ni	ni	ni	ni	ni
RN_000456	no	ni	ni	ni	ni	ni	ni	ni	ni	ni
RN_000457	no	REFNigelle_000457.p1	AT4G15280.1	7.3e-109	UGT71B5 description:UDP-glucosyl transferase 71B5 [Source:AT4G15280]	REFNigelle_000457.p1	Aqcoe4G273300.1.p	4e-158	AT4G15280.1	UDP-glucosyl transferase 71B5
RN_000459	no	REFNigelle_000459.p1	AT3G09120.1	1.67e-19	Putative uncharacterized protein [Source:UniProtKB/TrEMBL;Acc:Q5Q0C9]	REFNigelle_000459.p1	Aqcoe1G088300.1.p	3e-28	AT3G09140.2	Protein of unknown function (DUF674)
RN_000460	no	ni	ni	ni	ni	ni	ni	ni	ni	ni
RN_000461	no	ni	ni	ni	ni	ni	ni	ni	ni	ni
RN_000462	no	ni	ni	ni	ni	ni	ni	ni	ni	ni
RN_000463	no	REFNigelle_000463.p1	AT5G24760.1	6.01e-163	Alcohol dehydrogenase-like 6 [Source:UniProtKB/Swiss-Prot;Acc:Q8LEB2]	REFNigelle_000463.p1	Aqcoe1G123900.1.p	0	AT5G24760.1	GroES-like zinc-binding dehydrogenase family protein
RN_000464	no	ni	ni	ni	ni	REFNigelle_000464.p2	Aqcoe2G128200.1.p	5e-28	0	0
RN_000465	no	REFNigelle_000465.p1	AT3G24255.7	5.57e-24	RNA-directed DNA polymerase (Reverse transcriptase)-related family protein [Source:UniProtKB/TrEMBL;Acc:A0A1I9LSY4]	REFNigelle_000465.p1	Aqcoe7G262900.1.p	2e-19	AT4G29090.1	Ribonuclease H-like superfamily protein
RN_000466	no	ni	ni	ni	ni	ni	ni	ni	ni	ni
RN_000467	yes	ni	ni	ni	ni	ni	ni	ni	ni	ni
RN_000468	no	REFNigelle_000468.p1	AT2G47510.1	4.02e-81	FUM1 description:FUM1 [Source:A0A178VMD4]	REFNigelle_000468.p1	Aqcoe3G076900.2.p	2e-91	AT2G47510.2	fumarase 1
RN_000469	no	REFNigelle_000469.p1	AT2G47510.1	0	FUM1 description:FUM1 [Source:A0A178VMD4]	REFNigelle_000469.p1	Aqcoe2G285600.2.p	0	AT2G47510.2	fumarase 1
RN_000470	no	REFNigelle_000470.p2	AT1G21280.1	1.54e-19	Copia-like polyprotein/retrotransposon [Source:UniProtKB/TrEMBL;Acc:Q84JT5]	REFNigelle_000470.p2	Aqcoe7G153100.1.p	8e-14	AT1G21280.1	0
RN_000471	no	ni	ni	ni	ni	ni	ni	ni	ni	ni
RN_000472	no	ni	ni	ni	ni	ni	ni	ni	ni	ni
RN_000473	no	ni	ni	ni	ni	ni	ni	ni	ni	ni
RN_000474	no	REFNigelle_000474.p2	AT2G34480.1	1.46e-101	Ribosomal protein L18ae/LX family protein [Source:TAIR;Acc:AT2G34480]	REFNigelle_000474.p2	Aqcoe1G192800.1.p	2e-106	AT2G34480.1	Ribosomal protein L18ae/LX family protein
RN_000476	no	REFNigelle_000476.p1	AT4G23900.1	2.54e-136	NDK4 description:Nucleoside diphosphate kinase IV, chloroplastic/mitochondrial [Source:Q8LAH8]	REFNigelle_000476.p1	Aqcoe5G459500.1.p	1e-145	AT4G23900.1	Nucleoside diphosphate kinase family protein
RN_000478	no	REFNigelle_000478.p1	AT5G01020.1	0	PBL8 description:Probable serine/threonine-protein kinase PBL8 [Source:Q8GXZ3]	REFNigelle_000478.p1	Aqcoe2G069700.1.p	0	AT5G01020.1	Protein kinase superfamily protein
RN_000479	no	REFNigelle_000479.p3	AT4G23160.2	2.54e-73	CRK8 description:cysteine-rich RLK (RECEPTOR-like protein kinase) 8 [Source:AT4G23160]	REFNigelle_000479.p2	Aqcoe5G193900.1.p	2e-05	AT5G28780.1	PIF1 helicase
RN_000480	no	ni	ni	ni	ni	ni	ni	ni	ni	ni
RN_000491	no	ni	ni	ni	ni	ni	ni	ni	ni	ni
RN_000492	no	ni	ni	ni	ni	ni	ni	ni	ni	ni
RN_000493	no	ni	ni	ni	ni	ni	ni	ni	ni	ni
RN_000494	no	ni	ni	ni	ni	ni	ni	ni	ni	ni
RN_000495	no	ni	ni	ni	ni	ni	ni	ni	ni	ni
RN_000496	yes	ni	ni	ni	ni	ni	ni	ni	ni	ni
RN_000497	no	ni	ni	ni	ni	ni	ni	ni	ni	ni
RN_000498	no	ni	ni	ni	ni	ni	ni	ni	ni	ni
RN_000499	no	ni	ni	ni	ni	ni	ni	ni	ni	ni
RN_000500	no	ni	ni	ni	ni	ni	ni	ni	ni	ni
RN_000501	no	REFNigelle_000501.p1	AT3G21690.1	0	DTX40 description:Protein DETOXIFICATION 40 [Source:Q9LVD9]	REFNigelle_000501.p1	Aqcoe1G238700.1.p	0	AT3G21690.1	MATE efflux family protein
RN_000503	no	REFNigelle_000503.p1	AT1G70330.1	3.89e-99	ENT1 description:Equilibrative nucleotide transporter 1 [Source:Q8VXY7]	REFNigelle_000503.p1	Aqcoe3G060800.1.p	6e-139	AT1G70330.1	equilibrative nucleotide transporter 1
RN_000505	no	ni	ni	ni	ni	ni	ni	ni	ni	ni
RN_000506	no	ni	ni	ni	ni	ni	ni	ni	ni	ni
RN_000507	no	ni	ni	ni	ni	ni	ni	ni	ni	ni
RN_000509	no	REFNigelle_000509.p1	AT4G39260.3	2.44e-44	RBG8 description:Glycine-rich RNA-binding protein 8 [Source:Q03251]	REFNigelle_000509.p1	Aqcoe1G413200.1.p	5e-52	AT4G39260.3	cold, circadian rhythm, and RNA binding 1
RN_000511	no	ni	ni	ni	ni	ni	ni	ni	ni	ni
RN_000512	yes	ni	ni	ni	ni	ni	ni	ni	ni	ni
RN_000513	no	ni	ni	ni	ni	ni	ni	ni	ni	ni
RN_000514	no	ni	ni	ni	ni	ni	ni	ni	ni	ni
RN_000515	no	ni	ni	ni	ni	ni	ni	ni	ni	ni
RN_000516	no	ni	ni	ni	ni	ni	ni	ni	ni	ni
RN_000518	no	REFNigelle_000518.p1	AT5G14770.3	0	Pentatricopeptide repeat-containing protein At5g14770, mitochondrial [Source:UniProtKB/Swiss-Prot;Acc:Q9LER0]	REFNigelle_000518.p1	Aqcoe5G464200.1.p	0	AT5G14770.1	Tetratricopeptide repeat (TPR)-like superfamily protein
RN_000521	no	REFNigelle_000521.p1	AT3G48670.3	0	IDN2 description:Protein INVOLVED IN DE NOVO 2 [Source:Q8VZ79]	REFNigelle_000521.p1	Aqcoe5G391200.1.p	0	AT3G48670.1	XH/XS domain-containing protein
RN_000522	yes	ni	ni	ni	ni	ni	ni	ni	ni	ni
RN_000523	no	ni	ni	ni	ni	ni	ni	ni	ni	ni
RN_000524	no	ni	ni	ni	ni	ni	ni	ni	ni	ni
RN_000525	yes	ni	ni	ni	ni	ni	ni	ni	ni	ni
RN_000526	yes	ni	ni	ni	ni	ni	ni	ni	ni	ni
RN_000527	no	REFNigelle_000527.p1	AT2G27120.3	7.29e-26	POL2B description:DNA polymerase epsilon catalytic subunit [Source:AT2G27120]	REFNigelle_000527.p1	Aqcoe2G131900.1.p	4e-27	AT1G08260.1	DNA polymerase epsilon catalytic subunit
RN_000528	no	ni	ni	ni	ni	ni	ni	ni	ni	ni
RN_000529	no	ni	ni	ni	ni	ni	ni	ni	ni	ni
RN_000530	no	ni	ni	ni	ni	ni	ni	ni	ni	ni
RN_000532	no	ni	ni	ni	ni	REFNigelle_000532.p1	Aqcoe4G299000.1.p	5e-13	0	0
RN_000533	no	REFNigelle_000533.p1	AT1G17330.1	1.98e-51	At1g17330 [Source:UniProtKB/TrEMBL;Acc:Q8GUM8]	REFNigelle_000533.p1	Aqcoe3G434300.5.p	1e-56	AT1G17330.1	Metal-dependent phosphohydrolase
RN_000534	no	ni	ni	ni	ni	ni	ni	ni	ni	ni
RN_000535	no	REFNigelle_000535.p1	AT5G35160.4	0	TMN11 description:Transmembrane 9 superfamily member [Source:A0A178UDT0]	REFNigelle_000535.p1	Aqcoe7G367700.1.p	0	AT5G35160.2	Endomembrane protein 70 protein family
RN_000536	yes	ni	ni	ni	ni	ni	ni	ni	ni	ni
RN_000537	no	ni	ni	ni	ni	ni	ni	ni	ni	ni
RN_000538	no	ni	ni	ni	ni	ni	ni	ni	ni	ni
RN_000539	yes	REFNigelle_000539.p2	AT4G23160.2	1.62e-44	CRK8 description:cysteine-rich RLK (RECEPTOR-like protein kinase) 8 [Source:AT4G23160]	REFNigelle_000539.p3	Aqcoe1G345300.1.p	3e-13	AT1G21280.1	0
RN_000540	no	REFNigelle_000540.p1	AT1G03220.1	0	Eukaryotic aspartyl protease family protein [Source:UniProtKB/TrEMBL;Acc:Q9ZVS4]	REFNigelle_000540.p1	Aqcoe5G061100.1.p	0	AT1G03220.1	Eukaryotic aspartyl protease family protein
RN_000543	no	REFNigelle_000543.p1	AT5G35695.1	1.1e-26	CONTAINS InterPro DOMAIN/s: Putative harbinger transposase-derived nuclease (InterPro:AT5G35695]	REFNigelle_000543.p2	Aqcoe7G209800.1.p	1e-05	AT5G41980.1	0
RN_000544	no	REFNigelle_000544.p1	AT1G68090.1	4.38e-126	ANN5 description:Annexin D5 [Source:Q9C9X3]	REFNigelle_000544.p1	Aqcoe2G420400.2.p	0	AT1G68090.1	annexin 5
RN_000545	no	ni	ni	ni	ni	ni	ni	ni	ni	ni
RN_000546	no	REFNigelle_000546.p1	AT5G20940.1	4.05e-11	Beta-glucosidase-like protein [Source:UniProtKB/TrEMBL;Acc:Q8RWM4]	REFNigelle_000546.p1	Aqcoe1G069100.1.p	5e-14	AT5G20950.1	Glycosyl hydrolase family protein
RN_000547	no	ni	ni	ni	ni	REFNigelle_000547.p3	Aqcoe2G128200.1.p	1e-18	0	0
RN_000548	no	ni	ni	ni	ni	REFNigelle_000548.p3	Aqcoe2G128200.1.p	1e-18	0	0
RN_000549	no	ni	ni	ni	ni	ni	ni	ni	ni	ni
RN_000550	no	ni	ni	ni	ni	ni	ni	ni	ni	ni
RN_000551	no	ni	ni	ni	ni	ni	ni	ni	ni	ni
RN_000552	no	ni	ni	ni	ni	ni	ni	ni	ni	ni
RN_000553	no	ni	ni	ni	ni	ni	ni	ni	ni	ni
RN_000554	yes	ni	ni	ni	ni	ni	ni	ni	ni	ni
RN_000555	no	ni	ni	ni	ni	ni	ni	ni	ni	ni
RN_000556	no	ni	ni	ni	ni	ni	ni	ni	ni	ni
RN_000557	no	REFNigelle_000557.p1	AT4G32360.9	2.03e-93	MFDR description:NADPH:Q8W3L1]	REFNigelle_000557.p1	Aqcoe1G035800.3.p	1e-149	AT4G32360.1	Pyridine nucleotide-disulphide oxidoreductase family protein
RN_000558	yes	REFNigelle_000558.p1	AT5G44230.1	0	PCMP-H17 description:Pentatricopeptide repeat-containing protein At5g44230 [Source:Q9FFG8]	REFNigelle_000558.p1	Aqcoe7G377600.1.p	0	AT5G44230.1	Pentatricopeptide repeat (PPR) superfamily protein
RN_000560	no	ni	ni	ni	ni	REFNigelle_000560.p3	Aqcoe2G128200.1.p	3e-19	0	0
RN_000561	no	ni	ni	ni	ni	ni	ni	ni	ni	ni
RN_000570	yes	ni	ni	ni	ni	REFNigelle_000570.p1	Aqcoe5G398100.1.p	9e-07	0	0
RN_000574	no	ni	ni	ni	ni	ni	ni	ni	ni	ni
RN_000575	no	ni	ni	ni	ni	ni	ni	ni	ni	ni
RN_000576	no	ni	ni	ni	ni	ni	ni	ni	ni	ni
RN_000577	no	ni	ni	ni	ni	ni	ni	ni	ni	ni
RN_000581	yes	REFNigelle_000581.p1	AT3G29390.2	4.34e-149	RIK description:Protein RIK [Source:Q9LIA4]	REFNigelle_000581.p1	Aqcoe3G343500.2.p	5e-99	AT3G29390.1	RS2-interacting KH protein
RN_000583	no	REFNigelle_000583.p1	AT2G34930.1	1.37e-109	Disease resistance family protein / LRR family protein [Source:UniProtKB/TrEMBL;Acc:O64757]	REFNigelle_000583.p1	Aqcoe6G081400.1.p	3e-133	AT2G34930.1	disease resistance family protein / LRR family protein
RN_000584	no	REFNigelle_000584.p1	AT2G23610.1	6.1e-64	MES3 description:MES3 [Source:A0A178VT29]	REFNigelle_000584.p1	Aqcoe6G098200.1.p	6e-113	AT3G50440.1	methyl esterase 10
RN_000587	no	ni	ni	ni	ni	ni	ni	ni	ni	ni
RN_000589	no	REFNigelle_000589.p1	AT1G56345.1	2.69e-84	RNA pseudouridine synthase 1 [Source:UniProtKB/Swiss-Prot;Acc:Q7XA65]	REFNigelle_000589.p1	Aqcoe1G175100.4.p	5e-118	AT1G56345.1	Pseudouridine synthase family protein
RN_000590	no	ni	ni	ni	ni	ni	ni	ni	ni	ni
RN_000591	no	ni	ni	ni	ni	ni	ni	ni	ni	ni
RN_000592	no	ni	ni	ni	ni	ni	ni	ni	ni	ni
RN_000593	no	ni	ni	ni	ni	ni	ni	ni	ni	ni
RN_000595	no	ni	ni	ni	ni	ni	ni	ni	ni	ni
RN_000597	no	ni	ni	ni	ni	ni	ni	ni	ni	ni
RN_000598	no	ni	ni	ni	ni	ni	ni	ni	ni	ni
RN_000599	no	ni	ni	ni	ni	ni	ni	ni	ni	ni
RN_000602	yes	ni	ni	ni	ni	ni	ni	ni	ni	ni
RN_000604	no	ni	ni	ni	ni	ni	ni	ni	ni	ni
RN_000605	no	REFNigelle_000605.p1	AT5G50800.1	5.24e-41	SWEET13 description:Bidirectional sugar transporter SWEET [Source:A0A178UJY5]	REFNigelle_000605.p1	Aqcoe3G159400.1.p	2e-38	AT5G23660.1	homolog of Medicago truncatula MTN3
RN_000607	no	ni	ni	ni	ni	ni	ni	ni	ni	ni
RN_000609	no	ni	ni	ni	ni	ni	ni	ni	ni	ni
RN_000610	no	REFNigelle_000610.p1	AT1G69550.1	1.09e-20	Disease resistance protein (TIR-NBS-LRR class) [Source:UniProtKB/TrEMBL;Acc:F4I270]	REFNigelle_000610.p1	Aqcoe6G185400.1.p	7e-51	AT3G14460.1	LRR and NB-ARC domains-containing disease resistance protein
RN_000611	no	ni	ni	ni	ni	ni	ni	ni	ni	ni
RN_000612	no	ni	ni	ni	ni	ni	ni	ni	ni	ni
RN_000614	no	REFNigelle_000614.p2	AT1G43730.1	1.39e-06	RNA-directed DNA polymerase (Reverse transcriptase)-related family protein [Source:UniProtKB/TrEMBL;Acc:F4ICS7]	REFNigelle_000614.p2	Aqcoe4G250500.1.p	2e-09	AT2G02650.1	Ribonuclease H-like superfamily protein
RN_000615	no	ni	ni	ni	ni	ni	ni	ni	ni	ni
RN_000618	no	ni	ni	ni	ni	ni	ni	ni	ni	ni
RN_000619	no	REFNigelle_000619.p1	AT1G47350.1	9.61e-08	F-box associated ubiquitination effector family protein [Source:UniProtKB/TrEMBL;Acc:F4HT76]	REFNigelle_000619.p1	Aqcoe1G069100.1.p	2e-06	AT5G20950.1	Glycosyl hydrolase family protein
RN_000620	no	ni	ni	ni	ni	ni	ni	ni	ni	ni
RN_000621	no	ni	ni	ni	ni	ni	ni	ni	ni	ni
RN_000623	no	ni	ni	ni	ni	ni	ni	ni	ni	ni
RN_000624	no	REFNigelle_000624.p1	AT5G18230.3	7.13e-97	transcription regulator NOT2/NOT3/NOT5 family protein [Source:TAIR;Acc:AT5G18230]	REFNigelle_000624.p1	Aqcoe2G061400.1.p	3e-147	AT5G18230.1	transcription regulator NOT2/NOT3/NOT5 family protein
RN_000628	no	REFNigelle_000628.p2	AT3G02320.1	5.38e-07	tRNA (guanine(26)-N(2))-dimethyltransferase [Source:UniProtKB/TrEMBL;Acc:A0A178VEZ9]	REFNigelle_000628.p1	Aqcoe1G406900.1.p	3e-11	AT5G05240.1	Uncharacterised conserved protein (UCP030365)
RN_000630	no	REFNigelle_000630.p1	AT5G54010.1	4.28e-110	UGT79B6 description:UDP-glycosyltransferase 79B6 [Source:Q9FN26]	REFNigelle_000630.p1	Aqcoe1G246800.1.p	3e-121	AT5G54010.1	UDP-Glycosyltransferase superfamily protein
RN_000631	no	REFNigelle_000631.p1	AT5G54010.1	8.9e-37	UGT79B6 description:UDP-glycosyltransferase 79B6 [Source:Q9FN26]	REFNigelle_000631.p1	Aqcoe1G246800.1.p	1e-37	AT5G54010.1	UDP-Glycosyltransferase superfamily protein
RN_000634	no	REFNigelle_000634.p1	AT4G02550.1	1.95e-10	unknown protein; BEST Arabidopsis thaliana protein match is: unknown protein (TAIR:AT4G02550]	REFNigelle_000634.p1	Aqcoe2G283100.2.p	2e-07	AT4G02210.1	0
RN_000635	no	ni	ni	ni	ni	ni	ni	ni	ni	ni
RN_000636	no	REFNigelle_000636.p2	AT5G10050.1	5.03e-135	At5g10050 [Source:UniProtKB/TrEMBL;Acc:Q147P9]	REFNigelle_000636.p2	Aqcoe6G057100.1.p	4e-171	AT5G10050.1	NAD(P)-binding Rossmann-fold superfamily protein
RN_000638	no	REFNigelle_000638.p1	AT3G14470.2	9.75e-151	RPPL1 description:Putative disease resistance RPP13-like protein 1 [Source:Q9LRR4]	REFNigelle_000638.p1	Aqcoe6G185400.1.p	0	AT3G14460.1	LRR and NB-ARC domains-containing disease resistance protein
RN_000639	yes	REFNigelle_000639.p1	AT2G15010.1	1.88e-14	Probable thionin-2.3 [Source:UniProtKB/Swiss-Prot;Acc:Q8VZK8]	REFNigelle_000639.p1	Aqcoe4G072900.1.p	2e-27	AT1G66100.1	Plant thionin
RN_000640	no	REFNigelle_000640.p3	AT4G04650.1	0.000111	AT4g04650 protein [Source:UniProtKB/TrEMBL;Acc:Q9S9V5]	REFNigelle_000640.p3	Aqcoe2G157500.1.p	2e-10	AT2G02520.1	RNA-directed DNA polymerase (reverse transcriptase)-related family protein
RN_000641	no	ni	ni	ni	ni	ni	ni	ni	ni	ni
RN_000642	no	ni	ni	ni	ni	ni	ni	ni	ni	ni
RN_000645	no	ni	ni	ni	ni	ni	ni	ni	ni	ni
RN_000646	no	REFNigelle_000646.p1	AT4G13320.1	8.34e-09	At4g13320 [Source:UniProtKB/TrEMBL;Acc:Q9T0K3]	REFNigelle_000646.p1	Aqcoe7G172200.1.p	5e-24	AT4G37670.2	N-acetyl-l-glutamate synthase 2
RN_000647	no	ni	ni	ni	ni	ni	ni	ni	ni	ni
RN_000648	no	REFNigelle_000648.p1	AT1G69550.1	5.08e-19	Disease resistance protein (TIR-NBS-LRR class) [Source:UniProtKB/TrEMBL;Acc:F4I270]	REFNigelle_000648.p1	Aqcoe6G185400.2.p	2e-46	AT3G14460.1	LRR and NB-ARC domains-containing disease resistance protein
RN_000649	no	REFNigelle_000649.p1	AT3G14470.2	6.66e-46	RPPL1 description:Putative disease resistance RPP13-like protein 1 [Source:Q9LRR4]	REFNigelle_000649.p1	Aqcoe1G416400.3.p	4e-121	AT3G14470.1	NB-ARC domain-containing disease resistance protein
RN_000650	no	REFNigelle_000650.p1	AT5G55150.1	3.29e-13	Putative F-box protein At5g55150 [Source:UniProtKB/Swiss-Prot;Acc:Q9FLP7]	REFNigelle_000650.p1	Aqcoe7G406300.1.p	1e-55	AT5G55150.1	Protein of unknown function (DUF295)
RN_000651	yes	REFNigelle_000651.p1	AT4G35630.1	2.22e-153	PSAT1 description:Phosphoserine aminotransferase 1, chloroplastic [Source:Q96255]	REFNigelle_000651.p1	Aqcoe1G063800.1.p	0	AT4G35630.1	phosphoserine aminotransferase
RN_000652	no	REFNigelle_000652.p1	AT2G13440.1	0	Glucose-inhibited division family A protein [Source:UniProtKB/TrEMBL;Acc:Q9SHS2]	REFNigelle_000652.p1	Aqcoe6G031000.1.p	0	AT2G13440.1	glucose-inhibited division family A protein
RN_000653	no	REFNigelle_000653.p1	AT2G13440.1	0	Glucose-inhibited division family A protein [Source:UniProtKB/TrEMBL;Acc:Q9SHS2]	REFNigelle_000653.p1	Aqcoe6G031000.1.p	0	AT2G13440.1	glucose-inhibited division family A protein
RN_000654	no	REFNigelle_000654.p1	AT2G17030.1	2.76e-09	SKIP23 description:F-box protein SKIP23 [Source:Q3EBZ2]	REFNigelle_000654.p1	Aqcoe5G214300.1.p	1e-72	AT2G17036.1	F-box family protein with a domain of unknown function (DUF295)
RN_000655	no	REFNigelle_000655.p1	AT2G17030.1	2.64e-09	SKIP23 description:F-box protein SKIP23 [Source:Q3EBZ2]	REFNigelle_000655.p1	Aqcoe5G214300.1.p	1e-72	AT2G17036.1	F-box family protein with a domain of unknown function (DUF295)
RN_000656	no	ni	ni	ni	ni	ni	ni	ni	ni	ni
RN_000657	no	REFNigelle_000657.p1	AT3G25750.1	3.71e-09	Putative F-box protein At3g25750 [Source:UniProtKB/Swiss-Prot;Acc:Q9LS04]	REFNigelle_000657.p1	Aqcoe5G214300.1.p	4e-78	AT2G17036.1	F-box family protein with a domain of unknown function (DUF295)
RN_000658	no	REFNigelle_000658.p1	AT5G56440.1	1.46e-27	Putative FBD-associated F-box protein At5g56440 [Source:UniProtKB/Swiss-Prot;Acc:Q9FM87]	REFNigelle_000658.p1	Aqcoe5G164700.1.p	7e-78	AT4G14096.1	F-box/RNI-like superfamily protein
RN_000659	no	REFNigelle_000659.p1	AT2G34780.1	8.35e-49	MEE22 description:Maternal effect embryo arrest 22 [Source:F4IIV5]	REFNigelle_000659.p1	Aqcoe1G222300.1.p	2e-126	AT2G34780.1	maternal effect embryo arrest 22
RN_000661	no	REFNigelle_000661.p1	AT1G02205.1	0	CER1 description:Fatty acid hydroxylase superfamily [Source:AT1G02205]	REFNigelle_000661.p1	Aqcoe1G207500.1.p	0	AT1G02205.2	Fatty acid hydroxylase superfamily
RN_000662	yes	REFNigelle_000662.p1	AT5G19460.1	2.04e-108	NUDT20 description:Nudix hydrolase 20, chloroplastic [Source:Q8VXZ0]	REFNigelle_000662.p1	Aqcoe5G403300.1.p	1e-129	AT5G19460.1	nudix hydrolase homolog 20
RN_000666	no	ni	ni	ni	ni	ni	ni	ni	ni	ni
RN_000667	no	ni	ni	ni	ni	ni	ni	ni	ni	ni
RN_000669	no	REFNigelle_000669.p1	AT5G65850.1	4.31e-18	F-box protein At5g65850 [Source:UniProtKB/Swiss-Prot;Acc:Q9FHP3]	REFNigelle_000669.p1	Aqcoe5G032700.1.p	4e-36	AT3G06240.1	F-box family protein
RN_000670	no	REFNigelle_000670.p1	AT1G53790.1	1.07e-17	F-box and associated interaction domains-containing protein [Source:UniProtKB/TrEMBL;Acc:B3H7F2]	REFNigelle_000670.p1	Aqcoe5G032700.1.p	2e-36	AT3G06240.1	F-box family protein
RN_000671	yes	ni	ni	ni	ni	ni	ni	ni	ni	ni
RN_000672	no	REFNigelle_000672.p1	AT5G58003.1	7.79e-70	CPL4 description:CPL4 [Source:A0A178UQH1]	REFNigelle_000672.p1	Aqcoe7G313000.1.p	1e-127	AT5G58003.1	C-terminal domain phosphatase-like 4
RN_000673	no	REFNigelle_000673.p1	AT5G58003.1	4.31e-148	CPL4 description:CPL4 [Source:A0A178UQH1]	REFNigelle_000673.p1	Aqcoe7G313000.1.p	0	AT5G58003.1	C-terminal domain phosphatase-like 4
RN_000674	no	REFNigelle_000674.p1	AT5G58003.1	7.23e-70	CPL4 description:CPL4 [Source:A0A178UQH1]	REFNigelle_000674.p1	Aqcoe7G313000.1.p	2e-127	AT5G58003.1	C-terminal domain phosphatase-like 4
RN_000675	no	ni	ni	ni	ni	ni	ni	ni	ni	ni
RN_000676	no	REFNigelle_000676.p2	AT1G21280.1	3.21e-32	Copia-like polyprotein/retrotransposon [Source:UniProtKB/TrEMBL;Acc:Q84JT5]	REFNigelle_000676.p2	Aqcoe7G153100.1.p	1e-28	AT1G21280.1	0
RN_000677	no	ni	ni	ni	ni	ni	ni	ni	ni	ni
RN_000679	yes	ni	ni	ni	ni	ni	ni	ni	ni	ni
RN_000680	no	ni	ni	ni	ni	ni	ni	ni	ni	ni
RN_000681	no	ni	ni	ni	ni	ni	ni	ni	ni	ni
RN_000682	no	ni	ni	ni	ni	ni	ni	ni	ni	ni
RN_000683	no	REFNigelle_000683.p1	AT4G20430.2	8.75e-144	SBT2.2 description:Subtilisin-like protease SBT2.2 [Source:Q9SUN6]	REFNigelle_000683.p1	Aqcoe1G183000.1.p	0	AT4G20430.1	Subtilase family protein
RN_000684	no	ni	ni	ni	ni	REFNigelle_000684.p1	Aqcoe2G078300.4.p	3e-07	AT3G57660.1	nuclear RNA polymerase A1
RN_000685	no	REFNigelle_000685.p1	AT2G43650.1	2.8e-100	EMB2777 description:Sas10/U3 ribonucleoprotein (Utp) family protein [Source:Q8L3P4]	REFNigelle_000685.p1	Aqcoe5G059900.2.p	2e-164	AT2G43650.1	Sas10/U3 ribonucleoprotein (Utp) family protein
RN_000686	no	REFNigelle_000686.p1	AT4G36130.1	2.74e-126	RPL8C description:60S ribosomal protein L8-3 [Source:Q42064]	REFNigelle_000686.p1	Aqcoe1G371300.1.p	2e-131	AT4G36130.1	Ribosomal protein L2 family
RN_000687	no	REFNigelle_000687.p1	AT4G36130.1	2.74e-126	RPL8C description:60S ribosomal protein L8-3 [Source:Q42064]	REFNigelle_000687.p1	Aqcoe1G371300.1.p	2e-131	AT4G36130.1	Ribosomal protein L2 family
RN_000688	no	ni	ni	ni	ni	ni	ni	ni	ni	ni
RN_000689	yes	ni	ni	ni	ni	ni	ni	ni	ni	ni
RN_000690	yes	ni	ni	ni	ni	ni	ni	ni	ni	ni
RN_000691	no	ni	ni	ni	ni	ni	ni	ni	ni	ni
RN_000692	no	REFNigelle_000692.p1	AT3G45980.1	9.41e-69	H2B description:Histone H2B [Source:A0A178V9F6]	REFNigelle_000692.p1	Aqcoe3G407600.1.p	5e-55	AT3G45980.1	Histone superfamily protein
RN_000693	yes	REFNigelle_000693.p1	AT1G07790.1	1.49e-70	HTB1 description:Histone H2B.1 [Source:Q9LQQ4]	REFNigelle_000693.p1	Aqcoe1G124200.1.p	4e-57	AT3G45980.1	Histone superfamily protein
RN_000694	no	REFNigelle_000694.p1	AT1G07790.1	1.49e-70	HTB1 description:Histone H2B.1 [Source:Q9LQQ4]	REFNigelle_000694.p1	Aqcoe1G124200.1.p	4e-57	AT3G45980.1	Histone superfamily protein
RN_000695	no	REFNigelle_000695.p1	AT3G45980.1	2.47e-71	H2B description:Histone H2B [Source:A0A178V9F6]	REFNigelle_000695.p1	Aqcoe1G124200.1.p	1e-56	AT3G45980.1	Histone superfamily protein
RN_000696	yes	ni	ni	ni	ni	ni	ni	ni	ni	ni
RN_000697	no	ni	ni	ni	ni	ni	ni	ni	ni	ni
RN_000698	no	ni	ni	ni	ni	ni	ni	ni	ni	ni
RN_000699	no	ni	ni	ni	ni	ni	ni	ni	ni	ni
RN_000700	no	ni	ni	ni	ni	ni	ni	ni	ni	ni
RN_000701	no	REFNigelle_000701.p1	AT2G16390.2	0	DRD1 description:SNF2 domain-containing protein / helicase domain-containing protein [Source:A0A1P8B0G3]	REFNigelle_000701.p1	Aqcoe5G184600.4.p	0	AT2G16390.1	SNF2 domain-containing protein / helicase domain-containing protein
RN_000702	yes	REFNigelle_000702.p1	AT1G53430.2	3.48e-92	Probable LRR receptor-like serine/threonine-protein kinase At1g53430 [Source:UniProtKB/Swiss-Prot;Acc:C0LGG8]	REFNigelle_000702.p1	Aqcoe4G025800.2.p	2e-105	AT1G07650.2	Leucine-rich repeat transmembrane protein kinase
RN_000703	yes	REFNigelle_000703.p1	AT1G53430.2	7.5e-84	Probable LRR receptor-like serine/threonine-protein kinase At1g53430 [Source:UniProtKB/Swiss-Prot;Acc:C0LGG8]	REFNigelle_000703.p1	Aqcoe4G025800.2.p	6e-93	AT1G07650.2	Leucine-rich repeat transmembrane protein kinase
RN_000704	no	REFNigelle_000704.p1	AT1G07650.4	8.83e-105	Leucine-rich repeat transmembrane protein kinase [Source:UniProtKB/TrEMBL;Acc:F4HSE1]	REFNigelle_000704.p1	Aqcoe4G025800.2.p	2e-138	AT1G07650.2	Leucine-rich repeat transmembrane protein kinase
RN_000705	no	ni	ni	ni	ni	ni	ni	ni	ni	ni
RN_000706	yes	REFNigelle_000706.p1	AT1G07650.4	7.46e-135	Leucine-rich repeat transmembrane protein kinase [Source:UniProtKB/TrEMBL;Acc:F4HSE1]	REFNigelle_000706.p1	Aqcoe4G025800.2.p	2e-154	AT1G07650.2	Leucine-rich repeat transmembrane protein kinase
RN_000707	no	REFNigelle_000707.p2	AT1G07650.4	4.64e-52	Leucine-rich repeat transmembrane protein kinase [Source:UniProtKB/TrEMBL;Acc:F4HSE1]	REFNigelle_000707.p2	Aqcoe4G025700.1.p	1e-59	AT3G14840.2	Leucine-rich repeat transmembrane protein kinase
RN_000709	no	REFNigelle_000709.p1	AT1G07930.1	0	A1 description:Elongation factor 1-alpha 4 [Source:Q8GTY0]	REFNigelle_000709.p1	Aqcoe1G492200.1.p	0	AT5G60390.3	GTP binding Elongation factor Tu family protein
RN_000710	no	REFNigelle_000710.p1	AT1G07930.1	0	A1 description:Elongation factor 1-alpha 4 [Source:Q8GTY0]	REFNigelle_000710.p1	Aqcoe1G492200.1.p	0	AT5G60390.3	GTP binding Elongation factor Tu family protein
RN_000714	no	REFNigelle_000714.p1	AT3G06240.1	7.2e-34	F-box/kelch-repeat protein At3g06240 [Source:UniProtKB/Swiss-Prot;Acc:Q8GXC7]	REFNigelle_000714.p1	Aqcoe1G435100.1.p	2e-83	AT3G06240.1	F-box family protein
RN_000715	no	REFNigelle_000715.p1	AT1G43980.1	4.28e-87	PCMP-E58 description:Pentatricopeptide repeat-containing protein At1g43980, mitochondrial [Source:Q9LP03]	REFNigelle_000715.p1	Aqcoe6G028200.1.p	1e-150	AT1G43980.1	Tetratricopeptide repeat (TPR)-like superfamily protein
RN_000716	no	ni	ni	ni	ni	ni	ni	ni	ni	ni
RN_000719	yes	ni	ni	ni	ni	ni	ni	ni	ni	ni
RN_000720	no	ni	ni	ni	ni	ni	ni	ni	ni	ni
RN_000721	no	REFNigelle_000721.p1	AT3G18990.1	8.32e-17	VRN1 description:AP2/B3-like transcriptional factor family protein [Source:A0A1I9LQ83]	REFNigelle_000721.p1	Aqcoe2G102500.1.p	3e-54	AT3G18990.1	AP2/B3-like transcriptional factor family protein
RN_000723	no	ni	ni	ni	ni	ni	ni	ni	ni	ni
RN_000724	no	ni	ni	ni	ni	ni	ni	ni	ni	ni
RN_000725	no	REFNigelle_000725.p1	AT3G12340.1	1.43e-32	FKBP43 description:Peptidyl-prolyl cis-trans isomerase FKBP43 [Source:F4J9Q6]	REFNigelle_000725.p1	Aqcoe4G188000.16.p	3e-30	AT3G12340.1	FKBP-like peptidyl-prolyl cis-trans isomerase family protein
RN_000726	no	REFNigelle_000726.p1	AT1G55350.4	0	DEK1 description:Calpain-type cysteine protease family [Source:F4I0A4]	REFNigelle_000726.p1	Aqcoe1G057200.3.p	0	AT1G55350.4	calpain-type cysteine protease family
RN_000727	no	ni	ni	ni	ni	ni	ni	ni	ni	ni
RN_000728	no	ni	ni	ni	ni	ni	ni	ni	ni	ni
RN_000729	no	REFNigelle_000729.p1	AT5G48910.1	1.85e-14	PCMP-H38 description:Pentatricopeptide repeat-containing protein At5g48910 [Source:Q9FI80]	REFNigelle_000729.p1	Aqcoe5G451600.1.p	2e-33	AT2G13600.1	Pentatricopeptide repeat (PPR) superfamily protein
RN_000730	no	REFNigelle_000730.p1	AT4G01070.1	0	UGT72B1 description:UDP-glycosyltransferase 72B1 [Source:Q9M156]	REFNigelle_000730.p1	Aqcoe7G015200.1.p	0	AT4G01070.1	UDP-Glycosyltransferase superfamily protein
RN_000731	no	REFNigelle_000731.p1	AT3G57360.1	1.61e-77	At3g57360 [Source:UniProtKB/TrEMBL;Acc:Q6DBN3]	REFNigelle_000731.p1	Aqcoe7G354400.1.p	1e-112	AT3G57360.1	0
RN_000732	no	ni	ni	ni	ni	REFNigelle_000732.p1	Aqcoe2G174500.1.p	4e-11	0	0
RN_000733	no	REFNigelle_000733.p3	AT3G53270.2	5.81e-32	Small nuclear RNA activating complex (SNAPc), subunit SNAP43 protein [Source:UniProtKB/TrEMBL;Acc:Q8RXK3]	REFNigelle_000733.p3	Aqcoe4G093400.1.p	6e-31	AT3G53270.4	Small nuclear RNA activating complex (SNAPc), subunit SNAP43 protein
RN_000734	no	REFNigelle_000734.p1	AT3G42170.2	4.91e-19	HAT description:DAYSLEEPER [Source:A0A178VJS5]	REFNigelle_000734.p1	Aqcoe2G154400.1.p	6e-14	0	0
RN_000738	no	ni	ni	ni	ni	ni	ni	ni	ni	ni
RN_000741	no	REFNigelle_000741.p1	AT1G50300.1	7.49e-138	TAF15 description:Transcription initiation factor TFIID subunit 15 [Source:Q9AST1]	REFNigelle_000741.p1	Aqcoe3G437800.1.p	5e-166	AT1G50300.1	TBP-associated factor 15
RN_000742	no	ni	ni	ni	ni	ni	ni	ni	ni	ni
RN_000743	no	REFNigelle_000743.p1	AT4G39330.1	0	CAD9 description:Probable cinnamyl alcohol dehydrogenase 9 [Source:P42734]	REFNigelle_000743.p1	Aqcoe6G071400.1.p	0	AT4G39330.1	cinnamyl alcohol dehydrogenase 9
RN_000744	no	REFNigelle_000744.p1	AT1G66100.1	1.84e-11	Probable thionin-2.4 [Source:UniProtKB/Swiss-Prot;Acc:Q9C8D6]	REFNigelle_000744.p1	Aqcoe4G073300.1.p	3e-28	AT1G66100.1	Plant thionin
RN_000745	no	REFNigelle_000745.p1	AT5G07900.1	3.76e-74	Mitochondrial transcription termination factor family protein [Source:UniProtKB/TrEMBL;Acc:Q9SD94]	REFNigelle_000745.p1	Aqcoe7G126100.1.p	3e-124	AT5G07900.1	Mitochondrial transcription termination factor family protein
RN_000746	yes	ni	ni	ni	ni	ni	ni	ni	ni	ni
RN_000747	no	REFNigelle_000747.p1	AT3G43790.5	8.07e-49	ZIFL2 description:Probable peptide/nitrate transporter At3g43790 [Source:Q3EAQ5]	REFNigelle_000747.p1	Aqcoe2G020100.1.p	3e-63	AT5G13750.1	zinc induced facilitator-like 1
RN_000748	no	ni	ni	ni	ni	ni	ni	ni	ni	ni
RN_000749	no	REFNigelle_000749.p1	AT4G28190.1	1.71e-106	ULT1 description:Developmental regulator, ULTRAPETALA [Source:F4JKJ1]	REFNigelle_000749.p1	Aqcoe1G333200.1.p	1e-131	AT4G28190.1	Developmental regulator, ULTRAPETALA
RN_000750	yes	ni	ni	ni	ni	ni	ni	ni	ni	ni
RN_000751	no	ni	ni	ni	ni	ni	ni	ni	ni	ni
RN_000752	no	REFNigelle_000752.p1	AT2G03670.1	0	CDC48B description:Cell division control protein 48 homolog B [Source:Q9ZPR1]	REFNigelle_000752.p1	Aqcoe1G074100.1.p	0	AT2G03670.1	cell division cycle 48B
RN_000754	yes	ni	ni	ni	ni	ni	ni	ni	ni	ni
RN_000755	no	ni	ni	ni	ni	ni	ni	ni	ni	ni
RN_000757	no	ni	ni	ni	ni	ni	ni	ni	ni	ni
RN_000758	no	REFNigelle_000758.p1	AT4G26300.5	0	emb1027 description:Arginyl-tRNA synthetase, class Ic [Source:AT4G26300]	REFNigelle_000758.p1	Aqcoe2G042500.1.p	0	AT4G26300.1	Arginyl-tRNA synthetase, class Ic
RN_000760	no	REFNigelle_000760.p1	AT5G13870.3	3.04e-38	XTH5 description:Xyloglucan endotransglucosylase/hydrolase [Source:Q67Z90]	REFNigelle_000760.p1	Aqcoe5G319300.1.p	8e-39	AT5G13870.1	xyloglucan endotransglucosylase/hydrolase 5
RN_000761	no	REFNigelle_000761.p3	AT4G23160.2	6.53e-44	CRK8 description:cysteine-rich RLK (RECEPTOR-like protein kinase) 8 [Source:AT4G23160]	REFNigelle_000761.p4	Aqcoe5G193900.1.p	2e-06	AT5G28780.1	PIF1 helicase
RN_000762	no	ni	ni	ni	ni	ni	ni	ni	ni	ni
RN_000763	no	ni	ni	ni	ni	ni	ni	ni	ni	ni
RN_000764	no	ni	ni	ni	ni	ni	ni	ni	ni	ni
RN_000765	no	REFNigelle_000765.p1	AT4G20310.4	2.73e-117	S2P description:Site-2 protease [Source:A0A0F6SCX9]	REFNigelle_000765.p1	Aqcoe1G155700.1.p	4e-165	AT4G20310.2	Peptidase M50 family protein
RN_000766	yes	ni	ni	ni	ni	ni	ni	ni	ni	ni
RN_000767	no	ni	ni	ni	ni	ni	ni	ni	ni	ni
RN_000768	no	ni	ni	ni	ni	ni	ni	ni	ni	ni
RN_000769	no	ni	ni	ni	ni	ni	ni	ni	ni	ni
RN_000770	no	ni	ni	ni	ni	ni	ni	ni	ni	ni
RN_000771	no	REFNigelle_000771.p1	AT2G02030.1	1.83e-18	Putative F-box protein At2g02030 [Source:UniProtKB/Swiss-Prot;Acc:Q9ZPS1]	REFNigelle_000771.p1	Aqcoe5G032700.1.p	5e-35	AT3G06240.1	F-box family protein
RN_000772	no	REFNigelle_000772.p1	AT2G34260.1	3.22e-159	WDR55 description:WD repeat-containing protein 55 [Source:O80775]	REFNigelle_000772.p1	Aqcoe6G320900.1.p	0	AT2G34260.1	transducin family protein / WD-40 repeat family protein
RN_000775	no	ni	ni	ni	ni	ni	ni	ni	ni	ni
RN_000777	no	REFNigelle_000777.p1	AT5G03100.2	8.37e-17	F-box protein At5g03100 [Source:UniProtKB/Swiss-Prot;Acc:Q501G5]	REFNigelle_000777.p1	Aqcoe2G271800.1.p	4e-70	AT5G02700.1	F-box/RNI-like superfamily protein
RN_000778	no	ni	ni	ni	ni	REFNigelle_000778.p1	Aqcoe1G351100.2.p	1e-08	0	0
RN_000779	no	REFNigelle_000779.p1	AT3G47910.2	2.12e-33	Ubiquitin carboxyl-terminal hydrolase-related protein [Source:UniProtKB/TrEMBL;Acc:F4JCR3]	REFNigelle_000779.p1	Aqcoe3G321800.4.p	1e-34	AT3G47890.1	Ubiquitin carboxyl-terminal hydrolase-related protein
RN_000780	no	ni	ni	ni	ni	ni	ni	ni	ni	ni
RN_000781	no	ni	ni	ni	ni	ni	ni	ni	ni	ni
RN_000782	no	ni	ni	ni	ni	ni	ni	ni	ni	ni
RN_000783	no	REFNigelle_000783.p1	AT5G49730.1	0	FRO6 description:Ferric reduction oxidase 6 [Source:Q8RWS6]	REFNigelle_000783.p1	Aqcoe6G001000.1.p	0	AT5G49740.1	ferric reduction oxidase 7
RN_000784	yes	ni	ni	ni	ni	ni	ni	ni	ni	ni
RN_000785	no	ni	ni	ni	ni	REFNigelle_000785.p1	Aqcoe3G047800.1.p	9e-90	AT5G38630.1	cytochrome B561-1
RN_000786	no	ni	ni	ni	ni	ni	ni	ni	ni	ni
RN_000788	no	REFNigelle_000788.p1	AT3G24255.3	4.01e-21	RNA-directed DNA polymerase (Reverse transcriptase)-related family protein [Source:UniProtKB/TrEMBL;Acc:A0A1I9LSY4]	REFNigelle_000788.p1	Aqcoe3G174500.1.p	9e-26	AT3G09510.1	Ribonuclease H-like superfamily protein
RN_000791	no	ni	ni	ni	ni	ni	ni	ni	ni	ni
RN_000792	no	REFNigelle_000792.p1	AT5G07990.1	2.96e-142	CYP75B1 description:TT7 [Source:A0A178UNZ9]	REFNigelle_000792.p1	Aqcoe4G080200.1.p	0	AT5G07990.1	Cytochrome P450 superfamily protein
RN_000793	no	REFNigelle_000793.p1	AT1G53430.2	0	Probable LRR receptor-like serine/threonine-protein kinase At1g53430 [Source:UniProtKB/Swiss-Prot;Acc:C0LGG8]	REFNigelle_000793.p1	Aqcoe4G026500.1.p	0	AT1G53440.1	Leucine-rich repeat transmembrane protein kinase
RN_000794	no	REFNigelle_000794.p1	AT1G75200.1	2.59e-66	TYW1 description:S-adenosyl-L-methionine-dependent tRNA 4-demethylwyosine synthase [Source:Q8RXN5]	REFNigelle_000794.p1	Aqcoe6G119200.1.p	1e-75	AT1G75200.1	flavodoxin family protein / radical SAM domain-containing protein
RN_000795	no	REFNigelle_000795.p1	AT1G75200.1	0	TYW1 description:S-adenosyl-L-methionine-dependent tRNA 4-demethylwyosine synthase [Source:Q8RXN5]	REFNigelle_000795.p1	Aqcoe6G119200.1.p	0	AT1G75200.1	flavodoxin family protein / radical SAM domain-containing protein
RN_000797	no	REFNigelle_000797.p1	AT1G29220.1	9.3e-95	Transcriptional regulator family protein [Source:UniProtKB/TrEMBL;Acc:F4HZY1]	REFNigelle_000797.p1	Aqcoe1G222000.5.p	8e-161	AT1G29220.1	transcriptional regulator family protein
RN_000798	no	ni	ni	ni	ni	REFNigelle_000798.p1	Aqcoe2G128200.1.p	6e-26	0	0
RN_000799	no	ni	ni	ni	ni	ni	ni	ni	ni	ni
RN_000800	no	REFNigelle_000800.p1	AT1G67780.1	4.3e-23	Zinc-finger domain of monoamine-oxidase A repressor R1 protein [Source:UniProtKB/TrEMBL;Acc:F4HTR3]	REFNigelle_000800.p1	Aqcoe2G255200.1.p	9e-31	AT1G67780.1	Zinc-finger domain of monoamine-oxidase A repressor R1 protein
RN_000801	no	ni	ni	ni	ni	ni	ni	ni	ni	ni
RN_000802	no	REFNigelle_000802.p1	AT2G15980.1	1.42e-148	Pentatricopeptide repeat-containing protein At2g15980 [Source:UniProtKB/Swiss-Prot;Acc:Q9XIM8]	REFNigelle_000802.p1	Aqcoe5G203300.1.p	0	AT2G15980.1	Tetratricopeptide repeat (TPR)-like superfamily protein
RN_000803	no	ni	ni	ni	ni	ni	ni	ni	ni	ni
RN_000804	no	ni	ni	ni	ni	ni	ni	ni	ni	ni
RN_000805	no	REFNigelle_000805.p3	AT4G36130.1	3.22e-73	RPL8C description:60S ribosomal protein L8-3 [Source:Q42064]	REFNigelle_000805.p3	Aqcoe1G371300.1.p	4e-75	AT4G36130.1	Ribosomal protein L2 family
RN_000806	no	REFNigelle_000806.p1	AT3G63390.1	3.06e-28	At3g63390 [Source:UniProtKB/TrEMBL;Acc:Q1H5D6]	REFNigelle_000806.p1	Aqcoe7G441100.1.p	5e-33	AT3G63390.1	0
RN_000808	yes	ni	ni	ni	ni	ni	ni	ni	ni	ni
RN_000809	no	ni	ni	ni	ni	ni	ni	ni	ni	ni
RN_000810	yes	ni	ni	ni	ni	ni	ni	ni	ni	ni
RN_000811	no	ni	ni	ni	ni	ni	ni	ni	ni	ni
RN_000812	no	ni	ni	ni	ni	ni	ni	ni	ni	ni
RN_000813	no	ni	ni	ni	ni	ni	ni	ni	ni	ni
RN_000816	no	REFNigelle_000816.p1	AT5G18620.2	1.56e-127	CHR17 description:Chromatin-remodeling complex ATPase [Source:F4JY25]	REFNigelle_000816.p1	Aqcoe5G076600.1.p	6e-128	AT3G06400.2	chromatin-remodeling protein 11
RN_000817	no	ni	ni	ni	ni	ni	ni	ni	ni	ni
RN_000820	no	ni	ni	ni	ni	ni	ni	ni	ni	ni
RN_000821	no	ni	ni	ni	ni	ni	ni	ni	ni	ni
RN_000822	no	REFNigelle_000822.p1	AT3G22380.2	1.28e-151	TIC description:Time for coffee [Source:B3H7F6]	REFNigelle_000822.p1	Aqcoe2G341600.2.p	0	AT3G22380.2	time for coffee
RN_000824	no	ni	ni	ni	ni	ni	ni	ni	ni	ni
RN_000825	no	ni	ni	ni	ni	ni	ni	ni	ni	ni
RN_000826	no	ni	ni	ni	ni	ni	ni	ni	ni	ni
RN_000827	no	REFNigelle_000827.p1	AT1G61010.4	3.53e-118	CPSF73-I description:Cleavage and polyadenylation specificity factor subunit 3-I [Source:Q9C952]	REFNigelle_000827.p3	Aqcoe7G122700.1.p	3e-150	AT1G61010.3	cleavage and polyadenylation specificity factor 73-I
RN_000828	no	REFNigelle_000828.p1	AT2G31305.1	5.89e-21	INH3 description:Protein phosphatase 1 regulatory subunit INH3 [Source:Q8S8F7]	REFNigelle_000828.p1	Aqcoe7G371000.1.p	6e-29	AT2G31305.1	inhibitor-3
RN_000829	no	REFNigelle_000829.p1	AT2G31305.1	2.52e-22	INH3 description:Protein phosphatase 1 regulatory subunit INH3 [Source:Q8S8F7]	REFNigelle_000829.p1	Aqcoe7G371000.1.p	1e-28	AT2G31305.1	inhibitor-3
RN_000830	no	REFNigelle_000830.p1	AT2G31305.1	7.54e-23	INH3 description:Protein phosphatase 1 regulatory subunit INH3 [Source:Q8S8F7]	REFNigelle_000830.p1	Aqcoe7G371000.1.p	7e-26	AT2G31305.1	inhibitor-3
RN_000831	no	ni	ni	ni	ni	ni	ni	ni	ni	ni
RN_000832	no	REFNigelle_000832.p2	AT5G22650.2	2.19e-32	HDT2 description:Histone deacetylase HDT2 [Source:Q56WH4]	REFNigelle_000832.p2	Aqcoe1G111700.4.p	6e-48	AT5G03740.1	histone deacetylase 2C
RN_000834	no	ni	ni	ni	ni	ni	ni	ni	ni	ni
RN_000836	no	ni	ni	ni	ni	ni	ni	ni	ni	ni
RN_000837	no	REFNigelle_000837.p1	AT1G25360.1	0	PCMP-H74 description:Pentatricopeptide repeat-containing protein At1g25360 [Source:Q9FRI5]	REFNigelle_000837.p1	Aqcoe1G024800.1.p	0	AT1G25360.1	Pentatricopeptide repeat (PPR) superfamily protein
RN_000839	no	REFNigelle_000839.p1	AT1G21280.1	7.48e-30	Copia-like polyprotein/retrotransposon [Source:UniProtKB/TrEMBL;Acc:Q84JT5]	REFNigelle_000839.p1	Aqcoe7G153100.1.p	7e-13	AT1G21280.1	0
RN_000841	no	ni	ni	ni	ni	ni	ni	ni	ni	ni
RN_000842	no	REFNigelle_000842.p1	AT3G01330.1	1.38e-64	E2FF description:E2F transcription factor-like E2FF [Source:Q8RWL0]	REFNigelle_000842.p1	Aqcoe3G310600.1.p	2e-71	AT3G48160.2	DP-E2F-like 1
RN_000843	no	ni	ni	ni	ni	ni	ni	ni	ni	ni
RN_000844	no	REFNigelle_000844.p1	AT3G42170.1	0.001	HAT description:DAYSLEEPER [Source:A0A178VJS5]	ni	ni	ni	ni	ni
RN_000845	no	ni	ni	ni	ni	ni	ni	ni	ni	ni
RN_000846	no	ni	ni	ni	ni	ni	ni	ni	ni	ni
RN_000847	no	ni	ni	ni	ni	ni	ni	ni	ni	ni
RN_000848	no	ni	ni	ni	ni	ni	ni	ni	ni	ni
RN_000849	no	REFNigelle_000849.p1	AT4G34670.1	1.73e-102	RPS3AB description:40S ribosomal protein S3a [Source:A0A178UZT1]	REFNigelle_000849.p1	Aqcoe5G049700.1.p	2e-104	AT4G34670.1	Ribosomal protein S3Ae
RN_000850	yes	ni	ni	ni	ni	ni	ni	ni	ni	ni
RN_000851	no	REFNigelle_000851.p1	AT5G26860.1	0	LON_ARA_ARA description:lon protease 1 [Source:AT5G26860]	REFNigelle_000851.p1	Aqcoe7G347400.1.p	0	AT5G26860.1	lon protease 1
RN_000852	no	ni	ni	ni	ni	ni	ni	ni	ni	ni
RN_000854	no	ni	ni	ni	ni	ni	ni	ni	ni	ni
RN_000857	no	REFNigelle_000857.p1	AT3G15850.1	2.72e-42	ADS3 description:JB67 [Source:A0A178VBZ6]	REFNigelle_000857.p1	Aqcoe6G199600.1.p	7e-44	AT3G15850.1	fatty acid desaturase 5
RN_000859	no	ni	ni	ni	ni	ni	ni	ni	ni	ni
RN_000860	yes	REFNigelle_000860.p1	AT5G16486.1	1.87e-07	RNA-directed DNA polymerase (Reverse transcriptase)-related family protein [Source:UniProtKB/TrEMBL;Acc:Q1G3F8]	REFNigelle_000860.p1	Aqcoe6G294200.1.p	2e-12	AT3G25270.1	Ribonuclease H-like superfamily protein
RN_000861	no	ni	ni	ni	ni	ni	ni	ni	ni	ni
RN_000862	no	ni	ni	ni	ni	ni	ni	ni	ni	ni
RN_000863	no	REFNigelle_000863.p1	AT5G35790.1	0	APG1 description:Glucose-6-phosphate 1-dehydrogenase 1, chloroplastic [Source:Q43727]	REFNigelle_000863.p1	Aqcoe4G313000.1.p	0	AT5G35790.1	glucose-6-phosphate dehydrogenase 1
RN_000864	no	ni	ni	ni	ni	ni	ni	ni	ni	ni
RN_000865	no	ni	ni	ni	ni	ni	ni	ni	ni	ni
RN_000866	no	ni	ni	ni	ni	ni	ni	ni	ni	ni
RN_000867	no	ni	ni	ni	ni	ni	ni	ni	ni	ni
RN_000869	no	ni	ni	ni	ni	ni	ni	ni	ni	ni
RN_000872	no	REFNigelle_000872.p1	AT1G22380.1	4.01e-87	UGT85A3 description:Glycosyltransferase (Fragment) [Source:W8PW16]	REFNigelle_000872.p1	Aqcoe4G131500.1.p	5e-125	AT1G22380.1	UDP-glucosyl transferase 85A3
RN_000873	no	REFNigelle_000873.p1	AT1G22400.1	1.78e-89	UGT85A1 description:UDP-glycosyltransferase 85A1 [Source:Q9SK82]	REFNigelle_000873.p1	Aqcoe4G251400.1.p	7e-122	AT1G22360.1	UDP-glucosyl transferase 85A2
RN_000874	no	ni	ni	ni	ni	ni	ni	ni	ni	ni
RN_000875	no	ni	ni	ni	ni	ni	ni	ni	ni	ni
RN_000876	no	REFNigelle_000876.p1	AT1G29930.1	1.88e-171	LHCB1.3 description:Chlorophyll a-b binding protein 1, chloroplastic [Source:P04778]	REFNigelle_000876.p1	Aqcoe1G200700.1.p	2e-180	AT1G29930.1	chlorophyll A/B binding protein 1
RN_000877	yes	REFNigelle_000877.p1	AT1G29930.1	4.82e-171	LHCB1.3 description:Chlorophyll a-b binding protein 1, chloroplastic [Source:P04778]	REFNigelle_000877.p1	Aqcoe1G200700.1.p	0	AT1G29930.1	chlorophyll A/B binding protein 1
RN_000878	no	ni	ni	ni	ni	REFNigelle_000878.p1	Aqcoe0015s0006.1.p	4e-07	AT4G12560.2	F-box and associated interaction domains-containing protein
RN_000879	no	REFNigelle_000879.p3	AT1G67020.1	0.000149	F1O19.7 protein [Source:UniProtKB/TrEMBL;Acc:Q9FZH9]	REFNigelle_000879.p3	Aqcoe1G252100.1.p	2e-11	AT1G67020.1	0
RN_000881	no	REFNigelle_000881.p1	AT5G45500.9	2.07e-85	RNI-like superfamily protein [Source:UniProtKB/TrEMBL;Acc:Q9FHI6]	REFNigelle_000881.p1	Aqcoe4G300200.1.p	0	AT5G45500.2	RNI-like superfamily protein
RN_000882	yes	REFNigelle_000882.p1	AT5G16440.1	5.53e-40	IPP1 description:Isopentenyl-diphosphate Delta-isomerase I, chloroplastic [Source:Q38929]	REFNigelle_000882.p1	Aqcoe2G421100.1.p	2e-43	AT5G16440.1	isopentenyl diphosphate isomerase 1
RN_000883	no	ni	ni	ni	ni	ni	ni	ni	ni	ni
RN_000884	no	ni	ni	ni	ni	ni	ni	ni	ni	ni
RN_000885	no	REFNigelle_000885.p1	AT5G07630.2	9.96e-29	Lipid transporter [Source:UniProtKB/TrEMBL;Acc:F4K836]	REFNigelle_000885.p1	Aqcoe3G396600.2.p	8e-39	AT5G07630.1	lipid transporters
RN_000886	no	ni	ni	ni	ni	ni	ni	ni	ni	ni
RN_000887	no	ni	ni	ni	ni	ni	ni	ni	ni	ni
RN_000888	no	ni	ni	ni	ni	ni	ni	ni	ni	ni
RN_000889	no	REFNigelle_000889.p1	AT4G20520.1	1.66e-09	RNA binding / RNA-directed DNA polymerase [Source:UniProtKB/TrEMBL;Acc:Q9SUM7]	REFNigelle_000889.p1	Aqcoe4G244400.1.p	2e-13	AT1G43760.1	DNAse I-like superfamily protein
RN_000890	no	REFNigelle_000890.p1	AT1G52190.1	0	NPF1.2 description:Protein NRT1/ PTR FAMILY 1.2 [Source:Q9M817]	REFNigelle_000890.p1	Aqcoe7G166500.1.p	0	AT1G52190.1	Major facilitator superfamily protein
RN_000891	no	ni	ni	ni	ni	ni	ni	ni	ni	ni
RN_000892	no	ni	ni	ni	ni	ni	ni	ni	ni	ni
RN_000893	no	ni	ni	ni	ni	ni	ni	ni	ni	ni
RN_000894	no	ni	ni	ni	ni	ni	ni	ni	ni	ni
RN_000895	no	ni	ni	ni	ni	ni	ni	ni	ni	ni
RN_000897	no	REFNigelle_000897.p1	AT1G56120.3	9.64e-63	Leucine-rich repeat transmembrane protein kinase [Source:UniProtKB/TrEMBL;Acc:F4I3K0]	REFNigelle_000897.p1	Aqcoe4G216300.2.p	1e-91	AT1G70520.1	cysteine-rich RLK (RECEPTOR-like protein kinase) 2
RN_000898	yes	ni	ni	ni	ni	ni	ni	ni	ni	ni
RN_000899	no	REFNigelle_000899.p1	AT3G14660.2	7.7e-115	CYP72A13 description:Cytochrome P450 72A13 [Source:Q9LUC8]	REFNigelle_000899.p1	Aqcoe4G121900.1.p	1e-122	AT3G14690.1	cytochrome P450, family 72, subfamily A, polypeptide 15
RN_000900	no	ni	ni	ni	ni	ni	ni	ni	ni	ni
RN_000903	no	ni	ni	ni	ni	ni	ni	ni	ni	ni
RN_000904	no	ni	ni	ni	ni	ni	ni	ni	ni	ni
RN_000905	yes	REFNigelle_000905.p1	AT3G14620.1	3.9e-55	CYP72A8 description:AT3g14620/MIE1_12 [Source:Q9LUD2]	REFNigelle_000905.p1	Aqcoe3G173700.2.p	2e-63	AT3G14690.1	cytochrome P450, family 72, subfamily A, polypeptide 15
RN_000906	no	ni	ni	ni	ni	REFNigelle_000906.p2	Aqcoe2G128200.1.p	8e-24	0	0
RN_000907	no	REFNigelle_000907.p1	AT3G14460.1	3.89e-51	Putative disease resistance protein At3g14460 [Source:UniProtKB/Swiss-Prot;Acc:Q9LRR5]	REFNigelle_000907.p1	Aqcoe6G185400.2.p	5e-132	AT3G14460.1	LRR and NB-ARC domains-containing disease resistance protein
RN_000910	no	REFNigelle_000910.p1	AT4G17300.2	0	NS1 description:Class II aminoacyl-tRNA and biotin synthetases superfamily protein [Source:AT4G17300]	REFNigelle_000910.p1	Aqcoe5G215900.1.p	0	AT4G17300.1	Class II aminoacyl-tRNA and biotin synthetases superfamily protein
RN_000911	no	REFNigelle_000911.p1	AT4G17300.2	0	NS1 description:Class II aminoacyl-tRNA and biotin synthetases superfamily protein [Source:AT4G17300]	REFNigelle_000911.p1	Aqcoe5G215900.1.p	0	AT4G17300.1	Class II aminoacyl-tRNA and biotin synthetases superfamily protein
RN_000912	no	REFNigelle_000912.p1	AT4G17300.2	0	NS1 description:Class II aminoacyl-tRNA and biotin synthetases superfamily protein [Source:AT4G17300]	REFNigelle_000912.p1	Aqcoe5G215900.1.p	0	AT4G17300.1	Class II aminoacyl-tRNA and biotin synthetases superfamily protein
RN_000913	no	REFNigelle_000913.p1	AT2G45290.2	0	TKL-2 description:Transketolase-2, chloroplastic [Source:F4IW47]	REFNigelle_000913.p1	Aqcoe7G072700.1.p	0	AT3G60750.1	Transketolase
RN_000914	no	REFNigelle_000914.p1	AT3G60750.1	0	TKL-1 description:Transketolase-1, chloroplastic [Source:Q8RWV0]	REFNigelle_000914.p1	Aqcoe7G072700.1.p	0	AT3G60750.1	Transketolase
RN_000915	no	ni	ni	ni	ni	ni	ni	ni	ni	ni
RN_000916	no	REFNigelle_000916.p1	AT3G17700.2	1.64e-150	CNGC20 description:Probable cyclic nucleotide-gated ion channel 20, chloroplastic [Source:Q9LD37]	REFNigelle_000916.p1	Aqcoe3G421600.3.p	0	AT3G17700.1	cyclic nucleotide-binding transporter 1
RN_000917	no	REFNigelle_000917.p1	AT1G17020.1	1.52e-147	SRG1 description:Protein SRG1 [Source:Q39224]	REFNigelle_000917.p1	Aqcoe4G018800.1.p	0	AT1G17020.1	senescence-related gene 1
RN_000918	no	ni	ni	ni	ni	ni	ni	ni	ni	ni
RN_000919	no	REFNigelle_000919.p1	AT1G17020.1	3.41e-133	SRG1 description:Protein SRG1 [Source:Q39224]	REFNigelle_000919.p1	Aqcoe4G018800.1.p	1e-174	AT1G17020.1	senescence-related gene 1
RN_000920	yes	ni	ni	ni	ni	ni	ni	ni	ni	ni
RN_000921	yes	ni	ni	ni	ni	ni	ni	ni	ni	ni
RN_000922	no	ni	ni	ni	ni	ni	ni	ni	ni	ni
RN_000923	no	ni	ni	ni	ni	ni	ni	ni	ni	ni
RN_000924	no	ni	ni	ni	ni	ni	ni	ni	ni	ni
RN_000925	no	ni	ni	ni	ni	ni	ni	ni	ni	ni
RN_000927	no	ni	ni	ni	ni	ni	ni	ni	ni	ni
RN_000928	no	ni	ni	ni	ni	ni	ni	ni	ni	ni
RN_000929	no	ni	ni	ni	ni	ni	ni	ni	ni	ni
RN_000930	no	ni	ni	ni	ni	ni	ni	ni	ni	ni
RN_000931	no	ni	ni	ni	ni	ni	ni	ni	ni	ni
RN_000932	no	ni	ni	ni	ni	ni	ni	ni	ni	ni
RN_000933	no	ni	ni	ni	ni	ni	ni	ni	ni	ni
RN_000935	no	ni	ni	ni	ni	ni	ni	ni	ni	ni
RN_000936	no	REFNigelle_000936.p1	AT5G35690.1	2.44e-132	Zinc metalloproteinase-like protein [Source:UniProtKB/TrEMBL;Acc:Q8VYQ7]	REFNigelle_000936.p1	Aqcoe1G335800.1.p	9e-118	AT5G35690.1	0
RN_000937	no	REFNigelle_000937.p1	AT5G35690.1	1.67e-19	Zinc metalloproteinase-like protein [Source:UniProtKB/TrEMBL;Acc:Q8VYQ7]	REFNigelle_000937.p3	Aqcoe1G302500.1.p	5e-59	AT5G35690.1	0
RN_000938	no	ni	ni	ni	ni	ni	ni	ni	ni	ni
RN_000939	no	REFNigelle_000939.p1	ATMG00240.1	8.68e-06	ORF111A description:Uncharacterized mitochondrial protein AtMg00240 [Source:P93290]	ni	ni	ni	ni	ni
RN_000940	no	ni	ni	ni	ni	ni	ni	ni	ni	ni
RN_000941	no	REFNigelle_000941.p1	AT3G14470.2	5.17e-35	RPPL1 description:Putative disease resistance RPP13-like protein 1 [Source:Q9LRR4]	REFNigelle_000941.p1	Aqcoe1G416400.1.p	1e-54	AT3G14470.1	NB-ARC domain-containing disease resistance protein
RN_000942	no	REFNigelle_000942.p1	AT3G14470.2	4.72e-17	RPPL1 description:Putative disease resistance RPP13-like protein 1 [Source:Q9LRR4]	REFNigelle_000942.p1	Aqcoe1G416400.3.p	1e-34	AT3G14470.1	NB-ARC domain-containing disease resistance protein
RN_000943	no	ni	ni	ni	ni	ni	ni	ni	ni	ni
RN_000944	no	REFNigelle_000944.p1	AT5G06820.1	5.91e-22	SRF2 description:Protein STRUBBELIG-RECEPTOR FAMILY 2 [Source:Q9FG24]	REFNigelle_000944.p1	Aqcoe3G204700.1.p	3e-57	AT5G06820.1	STRUBBELIG-receptor family 2
RN_000945	no	ni	ni	ni	ni	ni	ni	ni	ni	ni
RN_000946	no	ni	ni	ni	ni	ni	ni	ni	ni	ni
RN_000947	no	REFNigelle_000947.p1	AT1G80630.1	1.61e-107	At1g80630 [Source:UniProtKB/TrEMBL;Acc:Q9M8N0]	REFNigelle_000947.p1	Aqcoe3G439800.1.p	4e-17	AT5G23340.1	RNI-like superfamily protein
RN_000948	no	REFNigelle_000948.p1	AT2G02520.1	7.91e-05	Putative non-LTR retroelement reverse transcriptase [Source:UniProtKB/TrEMBL;Acc:O64724]	REFNigelle_000948.p1	Aqcoe6G308000.1.p	8e-10	AT4G04650.1	RNA-directed DNA polymerase (reverse transcriptase)-related family protein
RN_000950	no	REFNigelle_000950.p1	AT4G23160.2	1.61e-96	CRK8 description:cysteine-rich RLK (RECEPTOR-like protein kinase) 8 [Source:AT4G23160]	REFNigelle_000950.p2	Aqcoe4G080300.1.p	8e-30	0	0
RN_000952	no	ni	ni	ni	ni	ni	ni	ni	ni	ni
RN_000954	no	REFNigelle_000954.p1	AT5G20350.1	0	PAT24 description:Protein S-acyltransferase 24 [Source:Q52T38]	REFNigelle_000954.p1	Aqcoe7G281700.2.p	0	AT5G20350.1	Ankyrin repeat family protein with DHHC zinc finger domain
RN_000955	no	ni	ni	ni	ni	REFNigelle_000955.p1	Aqcoe2G172800.1.p	1e-06	0	0
RN_000956	no	REFNigelle_000956.p1	AT1G14185.1	2.61e-166	At1g14180/F7A19_27 [Source:UniProtKB/TrEMBL;Acc:Q9XI69]	REFNigelle_000956.p1	Aqcoe3G341600.1.p	0	AT1G14190.1	Glucose-methanol-choline (GMC) oxidoreductase family protein
RN_000957	no	ni	ni	ni	ni	ni	ni	ni	ni	ni
RN_000959	no	REFNigelle_000959.p1	AT2G34930.1	2.42e-51	Disease resistance family protein / LRR family protein [Source:UniProtKB/TrEMBL;Acc:O64757]	REFNigelle_000959.p1	Aqcoe4G140400.1.p	3e-46	AT2G34930.1	disease resistance family protein / LRR family protein
RN_000960	no	REFNigelle_000960.p1	AT2G34930.1	2.76e-19	Disease resistance family protein / LRR family protein [Source:UniProtKB/TrEMBL;Acc:O64757]	REFNigelle_000960.p1	Aqcoe3G127800.1.p	6e-27	AT2G34930.1	disease resistance family protein / LRR family protein
RN_000961	no	REFNigelle_000961.p1	AT2G34930.1	1.42e-11	Disease resistance family protein / LRR family protein [Source:UniProtKB/TrEMBL;Acc:O64757]	REFNigelle_000961.p1	Aqcoe5G423200.1.p	7e-20	AT2G34930.1	disease resistance family protein / LRR family protein
RN_000962	no	ni	ni	ni	ni	ni	ni	ni	ni	ni
RN_000964	no	ni	ni	ni	ni	ni	ni	ni	ni	ni
RN_000965	no	REFNigelle_000965.p1	AT3G03140.1	9.06e-59	T17B22.17 protein [Source:UniProtKB/TrEMBL;Acc:Q9M9N3]	REFNigelle_000965.p1	Aqcoe3G183300.1.p	0	AT3G03140.1	Tudor/PWWP/MBT superfamily protein
RN_000966	no	ni	ni	ni	ni	ni	ni	ni	ni	ni
RN_000968	no	ni	ni	ni	ni	ni	ni	ni	ni	ni
RN_000969	no	REFNigelle_000969.p1	AT3G42170.1	1.93e-33	HAT description:DAYSLEEPER [Source:A0A178VJS5]	REFNigelle_000969.p1	Aqcoe2G141300.1.p	1e-28	AT3G42170.1	BED zinc finger ;hAT family dimerisation domain
RN_000970	no	ni	ni	ni	ni	ni	ni	ni	ni	ni
RN_000971	no	REFNigelle_000971.p1	AT5G06940.1	0	Probably inactive leucine-rich repeat receptor-like protein kinase At5g06940 [Source:UniProtKB/Swiss-Prot;Acc:Q9FL51]	REFNigelle_000971.p1	Aqcoe1G027200.1.p	0	AT5G06940.1	Leucine-rich repeat receptor-like protein kinase family protein
RN_000972	no	ni	ni	ni	ni	ni	ni	ni	ni	ni
RN_000973	no	ni	ni	ni	ni	ni	ni	ni	ni	ni
RN_000974	no	ni	ni	ni	ni	ni	ni	ni	ni	ni
RN_000975	yes	REFNigelle_000975.p1	AT1G40087.1	0.000479	Plant transposase (Ptta/En/Spm family) [Source:UniProtKB/TrEMBL;Acc:F4I6H5]	REFNigelle_000975.p1	Aqcoe6G195200.1.p	5e-09	AT1G40087.1	Plant transposase (Ptta/En/Spm family)
RN_000978	no	ni	ni	ni	ni	ni	ni	ni	ni	ni
RN_000979	no	ni	ni	ni	ni	ni	ni	ni	ni	ni
RN_000981	no	ni	ni	ni	ni	ni	ni	ni	ni	ni
RN_000983	no	REFNigelle_000983.p1	AT5G23720.3	6.77e-110	PHS1 description:Dual specificity protein phosphatase PHS1 [Source:Q75QN6]	REFNigelle_000983.p1	Aqcoe5G339400.2.p	5e-166	AT5G23720.3	dual specificity protein phosphatase family protein
RN_000984	no	ni	ni	ni	ni	ni	ni	ni	ni	ni
RN_000985	no	ni	ni	ni	ni	ni	ni	ni	ni	ni
RN_000986	no	ni	ni	ni	ni	REFNigelle_000986.p2	Aqcoe2G128200.1.p	2e-27	0	0
RN_000987	no	ni	ni	ni	ni	REFNigelle_000987.p2	Aqcoe2G128200.1.p	2e-29	0	0
RN_000988	no	ni	ni	ni	ni	ni	ni	ni	ni	ni
RN_000990	yes	ni	ni	ni	ni	ni	ni	ni	ni	ni
RN_000991	no	ni	ni	ni	ni	ni	ni	ni	ni	ni
RN_000992	no	REFNigelle_000992.p1	AT3G55000.1	8.3e-27	TON1A description:Protein TONNEAU 1a [Source:Q9FQ25]	REFNigelle_000992.p1	Aqcoe1G486400.1.p	1e-38	AT3G55005.1	tonneau 1b (TON1b)
RN_000993	no	REFNigelle_000993.p1	AT3G62270.1	5.45e-131	BOR2 description:Probable boron transporter 2 [Source:Q9M1P7]	REFNigelle_000993.p1	Aqcoe2G258900.1.p	3e-163	AT3G62270.1	HCO3- transporter family
RN_000994	no	ni	ni	ni	ni	ni	ni	ni	ni	ni
RN_000995	no	ni	ni	ni	ni	REFNigelle_000995.p1	Aqcoe3G118700.1.p	3e-18	AT1G70370.2	polygalacturonase 2
RN_000998	no	REFNigelle_000998.p1	AT4G23160.2	1.69e-25	CRK8 description:cysteine-rich RLK (RECEPTOR-like protein kinase) 8 [Source:AT4G23160]	ni	ni	ni	ni	ni
RN_000999	no	REFNigelle_000999.p3	AT4G23160.2	1.72e-08	CRK8 description:cysteine-rich RLK (RECEPTOR-like protein kinase) 8 [Source:AT4G23160]	ni	ni	ni	ni	ni
RN_001000	no	ni	ni	ni	ni	ni	ni	ni	ni	ni
RN_001001	no	REFNigelle_001001.p1	AT5G61910.2	1.76e-21	DCD (Development and Cell Death) domain protein [Source:UniProtKB/TrEMBL;Acc:F4K518]	REFNigelle_001001.p1	Aqcoe2G220100.2.p	4e-51	AT2G32910.1	DCD (Development and Cell Death) domain protein
RN_001002	no	REFNigelle_001002.p1	AT2G26790.2	4.32e-167	Pentatricopeptide repeat-containing protein At2g26790, mitochondrial [Source:UniProtKB/Swiss-Prot;Acc:O81028]	REFNigelle_001002.p1	Aqcoe1G012900.1.p	0	AT2G26790.1	Pentatricopeptide repeat (PPR) superfamily protein
RN_001003	no	ni	ni	ni	ni	ni	ni	ni	ni	ni
RN_001005	no	REFNigelle_001005.p1	AT1G11950.2	3.3e-157	Transcription factor jumonji (JmjC) domain-containing protein (Fragment) [Source:UniProtKB/TrEMBL;Acc:C0SUU8]	REFNigelle_001005.p1	Aqcoe3G157100.1.p	0	AT3G07610.1	Transcription factor jumonji (jmjC) domain-containing protein
RN_001006	no	REFNigelle_001006.p1	AT1G11950.2	2.53e-150	Transcription factor jumonji (JmjC) domain-containing protein (Fragment) [Source:UniProtKB/TrEMBL;Acc:C0SUU8]	REFNigelle_001006.p1	Aqcoe3G157100.1.p	0	AT3G07610.1	Transcription factor jumonji (jmjC) domain-containing protein
RN_001007	no	ni	ni	ni	ni	ni	ni	ni	ni	ni
RN_001008	no	ni	ni	ni	ni	ni	ni	ni	ni	ni
RN_001009	no	ni	ni	ni	ni	ni	ni	ni	ni	ni
RN_001010	no	ni	ni	ni	ni	ni	ni	ni	ni	ni
RN_001011	yes	REFNigelle_001011.p1	AT4G23990.2	2.57e-167	CSLG3 description:Cellulose synthase-like protein G3 [Source:Q0WVN5]	REFNigelle_001011.p1	Aqcoe5G450200.2.p	0	AT4G23990.1	cellulose synthase like G3
RN_001012	no	ni	ni	ni	ni	ni	ni	ni	ni	ni
RN_001013	no	REFNigelle_001013.p1	AT2G44140.3	0	ATG4A description:Cysteine protease ATG4a [Source:Q8S929]	REFNigelle_001013.p1	Aqcoe1G130200.1.p	0	AT2G44140.1	Peptidase family C54 protein
RN_001014	yes	ni	ni	ni	ni	ni	ni	ni	ni	ni
RN_001015	no	ni	ni	ni	ni	ni	ni	ni	ni	ni
RN_001016	no	ni	ni	ni	ni	ni	ni	ni	ni	ni
RN_001017	no	REFNigelle_001017.p1	AT5G54250.2	0	CNGC4 description:Cyclic nucleotide-gated ion channel 4 [Source:Q94AS9]	REFNigelle_001017.p1	Aqcoe4G259900.1.p	0	AT5G54250.2	cyclic nucleotide-gated cation channel 4
RN_001018	no	REFNigelle_001018.p1	AT1G03310.2	1.18e-102	ISA2 description:ISA2 [Source:A0A178WGA8]	REFNigelle_001018.p2	Aqcoe2G330100.1.p	0	AT1G03310.2	debranching enzyme 1
RN_001019	no	ni	ni	ni	ni	ni	ni	ni	ni	ni
RN_001020	no	ni	ni	ni	ni	ni	ni	ni	ni	ni
RN_001021	no	ni	ni	ni	ni	ni	ni	ni	ni	ni
RN_001022	no	ni	ni	ni	ni	ni	ni	ni	ni	ni
RN_001023	no	REFNigelle_001023.p2	AT1G57860.1	3.89e-108	RPL21E description:60S ribosomal protein L21-2 [Source:Q9FDZ9]	REFNigelle_001023.p2	Aqcoe5G311300.1.p	2e-117	AT1G57860.1	Translation protein SH3-like family protein
RN_001025	no	REFNigelle_001025.p1	AT1G59760.1	0	MTR4 description:DExH-box ATP-dependent RNA helicase DExH9 [Source:Q9XIF2]	REFNigelle_001025.p1	Aqcoe2G087300.1.p	0	AT1G59760.1	RNA helicase, ATP-dependent, SK12/DOB1 protein
RN_001026	no	REFNigelle_001026.p1	AT3G50590.2	0	Transducin/WD40 repeat-like superfamily protein [Source:UniProtKB/TrEMBL;Acc:F4J0P2]	REFNigelle_001026.p1	Aqcoe6G150400.1.p	0	AT3G50590.1	Transducin/WD40 repeat-like superfamily protein
RN_001027	no	REFNigelle_001027.p1	AT3G50590.2	0	Transducin/WD40 repeat-like superfamily protein [Source:UniProtKB/TrEMBL;Acc:F4J0P2]	REFNigelle_001027.p1	Aqcoe6G150400.1.p	0	AT3G50590.1	Transducin/WD40 repeat-like superfamily protein
RN_001028	no	ni	ni	ni	ni	ni	ni	ni	ni	ni
RN_001029	no	ni	ni	ni	ni	ni	ni	ni	ni	ni
RN_001030	no	REFNigelle_001030.p1	AT1G06900.1	0	Nardilysin-like [Source:UniProtKB/Swiss-Prot;Acc:F4HNU6]	REFNigelle_001030.p1	Aqcoe2G075400.2.p	0	AT1G06900.1	Insulinase (Peptidase family M16) family protein
RN_001031	no	REFNigelle_001031.p1	AT5G47900.1	0	Protein of unknown function (DUF1624) [Source:TAIR;Acc:AT5G47900]	REFNigelle_001031.p1	Aqcoe5G310400.1.p	0	AT5G47900.1	Protein of unknown function (DUF1624)
RN_001032	no	ni	ni	ni	ni	REFNigelle_001032.p1	Aqcoe3G174500.1.p	0.0003	AT3G09510.1	Ribonuclease H-like superfamily protein
RN_001033	no	REFNigelle_001033.p1	AT3G22220.3	1.2e-32	HAT transposon superfamily [Source:UniProtKB/TrEMBL;Acc:Q9LIE1]	REFNigelle_001033.p1	Aqcoe7G073800.1.p	2e-35	AT4G12300.1	cytochrome P450, family 706, subfamily A, polypeptide 4
RN_001034	no	REFNigelle_001034.p1	AT5G33406.1	1.51e-48	HAT dimerization domain-containing protein / transposase-like protein [Source:UniProtKB/TrEMBL;Acc:F4KHA1]	REFNigelle_001034.p2	Aqcoe7G073800.2.p	4e-42	AT4G12300.1	cytochrome P450, family 706, subfamily A, polypeptide 4
RN_001036	no	ni	ni	ni	ni	REFNigelle_001036.p3	Aqcoe4G119600.1.p	5e-12	0	0
RN_001039	no	ni	ni	ni	ni	ni	ni	ni	ni	ni
RN_001040	no	ni	ni	ni	ni	ni	ni	ni	ni	ni
RN_001041	no	REFNigelle_001041.p1	AT1G66580.1	9.43e-40	RPL10C description:60S ribosomal protein L10-3 [Source:Q93W22]	REFNigelle_001041.p1	Aqcoe3G413000.3.p	3e-44	AT1G66580.1	senescence associated gene 24
RN_001042	no	ni	ni	ni	ni	ni	ni	ni	ni	ni
RN_001043	no	REFNigelle_001043.p1	AT2G34930.1	7.87e-38	Disease resistance family protein / LRR family protein [Source:UniProtKB/TrEMBL;Acc:O64757]	REFNigelle_001043.p1	Aqcoe5G078500.1.p	1e-50	AT2G34930.1	disease resistance family protein / LRR family protein
RN_001045	no	REFNigelle_001045.p1	AT3G62760.1	3.53e-81	GSTF13 description:Glutathione S-transferase F13 [Source:Q9LZI9]	REFNigelle_001045.p1	Aqcoe6G310400.1.p	2e-100	AT3G62760.1	Glutathione S-transferase family protein
RN_001046	no	REFNigelle_001046.p1	AT4G18680.1	3.52e-15	unknown protein; BEST Arabidopsis thaliana protein match is: unknown protein (TAIR:AT4G18680]	REFNigelle_001046.p1	Aqcoe1G223200.1.p	9e-26	AT4G18690.1	0
RN_001047	no	REFNigelle_001047.p1	AT3G14075.1	0	AT3g14070/MAG2_2 [Source:UniProtKB/TrEMBL;Acc:Q94AB1]	REFNigelle_001047.p1	Aqcoe7G432900.1.p	0	AT3G14075.2	Mono-/di-acylglycerol lipase, N-terminal;Lipase, class 3
RN_001048	no	ni	ni	ni	ni	ni	ni	ni	ni	ni
RN_001049	no	REFNigelle_001049.p1	AT3G14470.2	1.28e-133	RPPL1 description:Putative disease resistance RPP13-like protein 1 [Source:Q9LRR4]	REFNigelle_001049.p1	Aqcoe4G313100.1.p	0	AT3G14470.1	NB-ARC domain-containing disease resistance protein
RN_001050	no	ni	ni	ni	ni	ni	ni	ni	ni	ni
RN_001051	no	ni	ni	ni	ni	ni	ni	ni	ni	ni
RN_001053	no	ni	ni	ni	ni	REFNigelle_001053.p1	Aqcoe2G128200.1.p	1e-20	0	0
RN_001054	no	ni	ni	ni	ni	ni	ni	ni	ni	ni
RN_001055	no	ni	ni	ni	ni	REFNigelle_001055.p1	Aqcoe6G266000.1.p	7e-10	AT1G43760.1	DNAse I-like superfamily protein
RN_001056	no	ni	ni	ni	ni	ni	ni	ni	ni	ni
RN_001057	no	ni	ni	ni	ni	REFNigelle_001057.p2	Aqcoe2G128200.1.p	3e-08	0	0
RN_001058	no	ni	ni	ni	ni	REFNigelle_001058.p1	Aqcoe7G343700.1.p	9e-05	AT5G15670.1	F-box family protein
RN_001059	yes	REFNigelle_001059.p1	AT1G53360.1	4.92e-09	Putative F-box protein At1g53360 [Source:UniProtKB/Swiss-Prot;Acc:Q3ECR3]	REFNigelle_001059.p1	Aqcoe7G367200.2.p	4e-77	AT1G50870.1	F-box and associated interaction domains-containing protein
RN_001061	no	ni	ni	ni	ni	ni	ni	ni	ni	ni
RN_001062	no	ni	ni	ni	ni	ni	ni	ni	ni	ni
RN_001063	no	REFNigelle_001063.p5	AT1G71810.1	3.13e-32	Uncharacterized aarF domain-containing protein kinase At1g71810, chloroplastic [Source:UniProtKB/Swiss-Prot;Acc:Q94BU1]	REFNigelle_001063.p5	Aqcoe5G257100.1.p	1e-41	AT1G71810.1	Protein kinase superfamily protein
RN_001064	no	REFNigelle_001064.p1	ATMG00860.1	2.3e-23	ORF158 description:Uncharacterized mitochondrial protein AtMg00860 [Source:P92523]	REFNigelle_001064.p1	Aqcoe6G275700.1.p	3e-12	0	0
RN_001065	no	REFNigelle_001065.p1	AT4G37100.1	0	Pyridoxal phosphate (PLP)-dependent transferases superfamily protein [Source:UniProtKB/TrEMBL;Acc:O23176]	REFNigelle_001065.p1	Aqcoe6G099800.1.p	0	AT2G23520.1	Pyridoxal phosphate (PLP)-dependent transferases superfamily protein
RN_001067	no	REFNigelle_001067.p1	AT5G35695.1	2.52e-21	CONTAINS InterPro DOMAIN/s: Putative harbinger transposase-derived nuclease (InterPro:AT5G35695]	REFNigelle_001067.p2	Aqcoe7G209800.1.p	2e-14	AT5G41980.1	0
RN_001068	no	REFNigelle_001068.p1	AT4G21065.1	1.67e-171	PCMP-H28 description:Pentatricopeptide repeat-containing protein At4g21065 [Source:A8MQA3]	REFNigelle_001068.p1	Aqcoe5G324200.3.p	0	AT4G21065.1	Tetratricopeptide repeat (TPR)-like superfamily protein
RN_001070	no	ni	ni	ni	ni	ni	ni	ni	ni	ni
RN_001073	no	ni	ni	ni	ni	ni	ni	ni	ni	ni
RN_001074	no	ni	ni	ni	ni	ni	ni	ni	ni	ni
RN_001075	no	ni	ni	ni	ni	ni	ni	ni	ni	ni
RN_001076	no	ni	ni	ni	ni	ni	ni	ni	ni	ni
RN_001077	no	ni	ni	ni	ni	ni	ni	ni	ni	ni
RN_001078	no	REFNigelle_001078.p1	AT4G04650.1	8.25e-14	AT4g04650 protein [Source:UniProtKB/TrEMBL;Acc:Q9S9V5]	REFNigelle_001078.p1	Aqcoe3G174500.1.p	4e-22	AT3G09510.1	Ribonuclease H-like superfamily protein
RN_001079	no	ni	ni	ni	ni	ni	ni	ni	ni	ni
RN_001080	no	ni	ni	ni	ni	ni	ni	ni	ni	ni
RN_001082	no	REFNigelle_001082.p1	AT2G03200.1	1.52e-38	At2g03200 [Source:UniProtKB/TrEMBL;Acc:Q84M99]	REFNigelle_001082.p1	Aqcoe5G457900.1.p	7e-87	AT2G35615.1	Eukaryotic aspartyl protease family protein
RN_001083	no	REFNigelle_001083.p1	AT1G43130.1	1.39e-142	LCV2 description:LCV2 [Source:A0A178WDP4]	REFNigelle_001083.p1	Aqcoe5G252600.1.p	4e-149	AT1G43130.1	like COV 2
RN_001084	no	ni	ni	ni	ni	ni	ni	ni	ni	ni
RN_001085	no	REFNigelle_001085.p1	AT1G60995.1	5e-83	Membralin-like protein At1g60995 [Source:UniProtKB/Swiss-Prot;Acc:Q8GWG6]	REFNigelle_001085.p1	Aqcoe1G175000.2.p	1e-130	AT1G60995.1	0
RN_001086	no	ni	ni	ni	ni	ni	ni	ni	ni	ni
RN_001087	no	ni	ni	ni	ni	ni	ni	ni	ni	ni
RN_001088	no	ni	ni	ni	ni	ni	ni	ni	ni	ni
RN_001089	no	ni	ni	ni	ni	ni	ni	ni	ni	ni
RN_001091	yes	REFNigelle_001091.p1	AT3G05660.1	1.06e-41	AtRLP33 description:Receptor-like protein 33 [Source:F4J8G2]	REFNigelle_001091.p1	Aqcoe1G502400.1.p	2e-49	AT1G71400.1	receptor like protein 12
RN_001092	yes	ni	ni	ni	ni	ni	ni	ni	ni	ni
RN_001093	no	ni	ni	ni	ni	ni	ni	ni	ni	ni
RN_001094	yes	ni	ni	ni	ni	ni	ni	ni	ni	ni
RN_001095	no	REFNigelle_001095.p1	AT4G15020.1	1.01e-138	HAT transposon superfamily [Source:UniProtKB/TrEMBL;Acc:F4JJC1]	REFNigelle_001095.p1	Aqcoe7G073800.2.p	3e-129	AT4G12300.1	cytochrome P450, family 706, subfamily A, polypeptide 4
RN_001096	no	REFNigelle_001096.p1	AT1G62930.1	1.12e-89	Pentatricopeptide repeat-containing protein At1g62930, chloroplastic [Source:UniProtKB/Swiss-Prot;Acc:Q9LQ14]	REFNigelle_001096.p1	Aqcoe7G038000.1.p	1e-123	AT1G62930.1	Tetratricopeptide repeat (TPR)-like superfamily protein
RN_001097	no	ni	ni	ni	ni	ni	ni	ni	ni	ni
RN_001098	no	REFNigelle_001098.p1	AT3G14840.2	3.62e-175	LRR-RLK description:Probable leucine-rich repeat receptor-like serine/threonine-protein kinase At3g14840 [Source:C0LGN2]	REFNigelle_001098.p1	Aqcoe4G052000.1.p	0	AT3G14840.2	Leucine-rich repeat transmembrane protein kinase
RN_001100	no	ni	ni	ni	ni	ni	ni	ni	ni	ni
RN_001101	no	ni	ni	ni	ni	ni	ni	ni	ni	ni
RN_001104	no	REFNigelle_001104.p1	AT1G16290.2	9.89e-180	FUNCTIONS IN: molecular_function unknown; INVOLVED IN:AT1G16290]	REFNigelle_001104.p1	Aqcoe1G163000.1.p	0	AT1G16290.1	0
RN_001106	no	ni	ni	ni	ni	ni	ni	ni	ni	ni
RN_001107	no	REFNigelle_001107.p2	AT3G62260.1	2.31e-26	Probable protein phosphatase 2C 49 [Source:UniProtKB/Swiss-Prot;Acc:Q3EAF9]	REFNigelle_001107.p2	Aqcoe2G260900.1.p	2e-39	AT3G62260.1	Protein phosphatase 2C family protein
RN_001108	no	ni	ni	ni	ni	ni	ni	ni	ni	ni
RN_001109	no	REFNigelle_001109.p1	ATMG01250.1	1.7e-16	ORF102 description:Uncharacterized mitochondrial protein AtMg01250 [Source:P92555]	ni	ni	ni	ni	ni
RN_001110	no	REFNigelle_001110.p1	AT3G24255.3	5.97e-13	RNA-directed DNA polymerase (Reverse transcriptase)-related family protein [Source:UniProtKB/TrEMBL;Acc:A0A1I9LSY4]	REFNigelle_001110.p1	Aqcoe7G048600.1.p	3e-17	ATMG00310.1	RNA-directed DNA polymerase (reverse transcriptase)-related family protein
RN_001111	no	REFNigelle_001111.p1	AT3G42170.1	6e-06	HAT description:DAYSLEEPER [Source:A0A178VJS5]	ni	ni	ni	ni	ni
RN_001114	no	REFNigelle_001114.p1	AT1G15910.1	2e-87	FDM1 description:IDP1 [Source:A0A178W3T4]	REFNigelle_001114.p1	Aqcoe5G471100.2.p	0	AT1G15910.1	XH/XS domain-containing protein
RN_001116	no	REFNigelle_001116.p1	AT3G62260.3	3.26e-29	Probable protein phosphatase 2C 49 [Source:UniProtKB/Swiss-Prot;Acc:Q3EAF9]	REFNigelle_001116.p1	Aqcoe2G260900.1.p	1e-35	AT3G62260.1	Protein phosphatase 2C family protein
RN_001117	no	REFNigelle_001117.p1	AT3G04680.1	0	CLPS3 description:Protein CLP1 homolog [Source:Q9SR06]	REFNigelle_001117.p1	Aqcoe3G326200.1.p	0	AT3G04680.1	CLP-similar protein 3
RN_001118	no	ni	ni	ni	ni	ni	ni	ni	ni	ni
RN_001119	no	ni	ni	ni	ni	ni	ni	ni	ni	ni
RN_001120	no	REFNigelle_001120.p2	AT4G04650.1	5.53e-17	AT4g04650 protein [Source:UniProtKB/TrEMBL;Acc:Q9S9V5]	REFNigelle_001120.p2	Aqcoe3G131700.1.p	5e-19	AT1G60720.1	RNA-directed DNA polymerase (reverse transcriptase)-related family protein
RN_001121	no	ni	ni	ni	ni	ni	ni	ni	ni	ni
RN_001122	no	ni	ni	ni	ni	REFNigelle_001122.p1	Aqcoe1G362200.2.p	1e-33	AT5G27260.1	0
RN_001123	no	ni	ni	ni	ni	ni	ni	ni	ni	ni
RN_001124	no	ni	ni	ni	ni	ni	ni	ni	ni	ni
RN_001126	no	REFNigelle_001126.p3	AT4G38180.1	1.09e-19	FRS5 description:Protein FAR1-RELATED SEQUENCE 5 [Source:Q9SZL8]	REFNigelle_001126.p1	Aqcoe6G268400.1.p	6e-36	AT4G38180.1	FAR1-related sequence 5
RN_001127	no	REFNigelle_001127.p1	AT1G62930.1	2.79e-34	Pentatricopeptide repeat-containing protein At1g62930, chloroplastic [Source:UniProtKB/Swiss-Prot;Acc:Q9LQ14]	REFNigelle_001127.p1	Aqcoe3G108100.1.p	7e-55	AT1G64100.1	pentatricopeptide (PPR) repeat-containing protein
RN_001128	no	ni	ni	ni	ni	REFNigelle_001128.p1	Aqcoe6G155500.1.p	0.0004	AT5G27260.1	0
RN_001131	yes	ni	ni	ni	ni	ni	ni	ni	ni	ni
RN_001132	no	ni	ni	ni	ni	ni	ni	ni	ni	ni
RN_001133	no	REFNigelle_001133.p1	AT5G63450.1	8.66e-110	CYP94B1 description:cytochrome P450, family 94, subfamily B, polypeptide 1 [Source:AT5G63450]	REFNigelle_001133.p1	Aqcoe5G035400.1.p	0	AT3G48520.1	cytochrome P450, family 94, subfamily B, polypeptide 3
RN_001134	no	REFNigelle_001134.p1	AT5G63450.1	6.64e-150	CYP94B1 description:cytochrome P450, family 94, subfamily B, polypeptide 1 [Source:AT5G63450]	REFNigelle_001134.p1	Aqcoe5G035400.1.p	0	AT3G48520.1	cytochrome P450, family 94, subfamily B, polypeptide 3
RN_001135	yes	REFNigelle_001135.p1	AT1G53430.1	0	Probable LRR receptor-like serine/threonine-protein kinase At1g53430 [Source:UniProtKB/Swiss-Prot;Acc:C0LGG8]	REFNigelle_001135.p1	Aqcoe4G026500.1.p	0	AT1G53440.1	Leucine-rich repeat transmembrane protein kinase
RN_001136	no	ni	ni	ni	ni	ni	ni	ni	ni	ni
RN_001137	no	ni	ni	ni	ni	ni	ni	ni	ni	ni
RN_001139	no	ni	ni	ni	ni	ni	ni	ni	ni	ni
RN_001140	no	ni	ni	ni	ni	ni	ni	ni	ni	ni
RN_001141	no	REFNigelle_001141.p1	AT3G21640.1	0	FKBP42 description:Peptidylprolyl isomerase [Source:A0A178V6X3]	REFNigelle_001141.p1	Aqcoe2G017700.2.p	0	AT3G21640.1	FKBP-type peptidyl-prolyl cis-trans isomerase family protein
RN_001142	no	ni	ni	ni	ni	ni	ni	ni	ni	ni
RN_001143	no	REFNigelle_001143.p1	AT3G24255.4	3.69e-37	RNA-directed DNA polymerase (Reverse transcriptase)-related family protein [Source:UniProtKB/TrEMBL;Acc:A0A1I9LSY4]	REFNigelle_001143.p1	Aqcoe3G174500.1.p	2e-26	AT3G09510.1	Ribonuclease H-like superfamily protein
RN_001144	yes	ni	ni	ni	ni	ni	ni	ni	ni	ni
RN_001145	no	REFNigelle_001145.p1	AT3G14470.2	2.12e-76	RPPL1 description:Putative disease resistance RPP13-like protein 1 [Source:Q9LRR4]	REFNigelle_001145.p1	Aqcoe6G185400.2.p	0	AT3G14460.1	LRR and NB-ARC domains-containing disease resistance protein
RN_001148	no	ni	ni	ni	ni	ni	ni	ni	ni	ni
RN_001152	no	ni	ni	ni	ni	ni	ni	ni	ni	ni
RN_001153	yes	ni	ni	ni	ni	ni	ni	ni	ni	ni
RN_001154	no	ni	ni	ni	ni	ni	ni	ni	ni	ni
RN_001155	no	ni	ni	ni	ni	ni	ni	ni	ni	ni
RN_001157	no	ni	ni	ni	ni	ni	ni	ni	ni	ni
RN_001159	no	REFNigelle_001159.p1	AT4G27610.8	1.22e-109	Intracellular protein transporter [Source:UniProtKB/TrEMBL;Acc:Q84JD6]	REFNigelle_001159.p1	Aqcoe1G287700.1.p	3e-160	AT4G27610.2	0
RN_001160	no	ni	ni	ni	ni	ni	ni	ni	ni	ni
RN_001161	no	REFNigelle_001161.p1	AT5G49980.1	1.91e-40	AFB5 description:AFB5 [Source:A0A178UB83]	REFNigelle_001161.p1	Aqcoe5G163900.2.p	5e-47	AT5G49980.1	auxin F-box protein 5
RN_001162	no	ni	ni	ni	ni	ni	ni	ni	ni	ni
RN_001163	no	ni	ni	ni	ni	ni	ni	ni	ni	ni
RN_001164	yes	ni	ni	ni	ni	REFNigelle_001164.p1	Aqcoe2G030500.1.p	2e-10	0	0
RN_001165	no	ni	ni	ni	ni	REFNigelle_001165.p1	Aqcoe4G169600.2.p	1e-27	0	0
RN_001166	no	ni	ni	ni	ni	REFNigelle_001166.p1	Aqcoe4G169600.2.p	5e-28	0	0
RN_001167	no	ni	ni	ni	ni	REFNigelle_001167.p1	Aqcoe4G169600.2.p	1e-27	0	0
RN_001168	no	ni	ni	ni	ni	ni	ni	ni	ni	ni
RN_001169	no	ni	ni	ni	ni	ni	ni	ni	ni	ni
RN_001170	no	ni	ni	ni	ni	ni	ni	ni	ni	ni
RN_001171	no	REFNigelle_001171.p2	AT3G02320.1	5.38e-07	tRNA (guanine(26)-N(2))-dimethyltransferase [Source:UniProtKB/TrEMBL;Acc:A0A178VEZ9]	REFNigelle_001171.p2	Aqcoe7G340500.4.p	7e-08	AT5G15810.1	N2,N2-dimethylguanosine tRNA methyltransferase
RN_001172	no	ni	ni	ni	ni	ni	ni	ni	ni	ni
RN_001173	no	REFNigelle_001173.p1	AT4G38180.1	5.01e-135	FRS5 description:Protein FAR1-RELATED SEQUENCE 5 [Source:Q9SZL8]	REFNigelle_001173.p1	Aqcoe3G109600.1.p	0	AT4G38180.1	FAR1-related sequence 5
RN_001174	no	REFNigelle_001174.p2	AT3G12590.1	6.32e-125	unknown protein; INVOLVED IN: biological_process unknown; LOCATED IN:AT3G12590]	REFNigelle_001174.p2	Aqcoe2G181300.1.p	1e-176	AT3G12590.1	0
RN_001175	no	REFNigelle_001175.p1	AT3G14470.2	1.38e-76	RPPL1 description:Putative disease resistance RPP13-like protein 1 [Source:Q9LRR4]	REFNigelle_001175.p1	Aqcoe5G371700.2.p	0	AT3G14470.1	NB-ARC domain-containing disease resistance protein
RN_001176	no	REFNigelle_001176.p1	AT3G14470.2	7.07e-75	RPPL1 description:Putative disease resistance RPP13-like protein 1 [Source:Q9LRR4]	REFNigelle_001176.p1	Aqcoe5G371700.2.p	0	AT3G14470.1	NB-ARC domain-containing disease resistance protein
RN_001177	no	ni	ni	ni	ni	ni	ni	ni	ni	ni
RN_001178	no	ni	ni	ni	ni	ni	ni	ni	ni	ni
RN_001179	no	ni	ni	ni	ni	ni	ni	ni	ni	ni
RN_001180	no	ni	ni	ni	ni	ni	ni	ni	ni	ni
RN_001181	no	ni	ni	ni	ni	ni	ni	ni	ni	ni
RN_001182	no	ni	ni	ni	ni	ni	ni	ni	ni	ni
RN_001183	no	ni	ni	ni	ni	ni	ni	ni	ni	ni
RN_001184	no	ni	ni	ni	ni	ni	ni	ni	ni	ni
RN_001185	no	ni	ni	ni	ni	ni	ni	ni	ni	ni
RN_001186	no	ni	ni	ni	ni	ni	ni	ni	ni	ni
RN_001187	no	REFNigelle_001187.p1	AT4G04650.1	8.77e-16	AT4g04650 protein [Source:UniProtKB/TrEMBL;Acc:Q9S9V5]	REFNigelle_001187.p1	Aqcoe3G131700.1.p	2e-30	AT1G60720.1	RNA-directed DNA polymerase (reverse transcriptase)-related family protein
RN_001189	no	ni	ni	ni	ni	ni	ni	ni	ni	ni
RN_001190	no	REFNigelle_001190.p1	AT4G04650.1	6.4e-12	AT4g04650 protein [Source:UniProtKB/TrEMBL;Acc:Q9S9V5]	REFNigelle_001190.p1	Aqcoe3G174500.1.p	1e-19	AT3G09510.1	Ribonuclease H-like superfamily protein
RN_001191	no	REFNigelle_001191.p1	AT1G07590.1	0	Pentatricopeptide repeat-containing protein At1g07590, mitochondrial [Source:UniProtKB/Swiss-Prot;Acc:Q940Q2]	REFNigelle_001191.p1	Aqcoe2G150100.1.p	0	AT1G07590.1	Tetratricopeptide repeat (TPR)-like superfamily protein
RN_001193	no	ni	ni	ni	ni	REFNigelle_001193.p2	Aqcoe1G271000.1.p	2e-36	AT1G62310.1	transcription factor jumonji (jmjC) domain-containing protein
RN_001195	no	ni	ni	ni	ni	ni	ni	ni	ni	ni
RN_001196	no	ni	ni	ni	ni	ni	ni	ni	ni	ni
RN_001197	no	ni	ni	ni	ni	ni	ni	ni	ni	ni
RN_001199	yes	ni	ni	ni	ni	REFNigelle_001199.p2	Aqcoe2G248200.1.p	2e-99	0	0
RN_001200	yes	REFNigelle_001200.p2	AT3G21000.1	5.38e-11	Gag-Pol-related retrotransposon family protein [Source:UniProtKB/TrEMBL;Acc:Q1PEN6]	REFNigelle_001200.p2	Aqcoe5G193900.1.p	5e-06	AT5G28780.1	PIF1 helicase
RN_001202	no	ni	ni	ni	ni	ni	ni	ni	ni	ni
RN_001204	no	ni	ni	ni	ni	ni	ni	ni	ni	ni
RN_001205	yes	ni	ni	ni	ni	ni	ni	ni	ni	ni
RN_001207	yes	ni	ni	ni	ni	ni	ni	ni	ni	ni
RN_001208	no	REFNigelle_001208.p1	AT1G09710.1	5.76e-85	Homeodomain-like superfamily protein [Source:UniProtKB/TrEMBL;Acc:F4I129]	REFNigelle_001208.p1	Aqcoe5G167400.1.p	0	AT1G09710.1	Homeodomain-like superfamily protein
RN_001209	no	ni	ni	ni	ni	ni	ni	ni	ni	ni
RN_001210	no	ni	ni	ni	ni	ni	ni	ni	ni	ni
RN_001211	no	ni	ni	ni	ni	ni	ni	ni	ni	ni
RN_001212	no	ni	ni	ni	ni	ni	ni	ni	ni	ni
RN_001213	no	ni	ni	ni	ni	REFNigelle_001213.p1	Aqcoe2G128200.1.p	9e-21	0	0
RN_001215	no	ni	ni	ni	ni	ni	ni	ni	ni	ni
RN_001216	no	REFNigelle_001216.p1	AT4G23650.1	5.21e-72	CPK3 description:CPK3 [Source:A0A178V4I3]	REFNigelle_001216.p1	Aqcoe7G023000.1.p	2e-78	AT4G23650.1	calcium-dependent protein kinase 6
RN_001217	no	ni	ni	ni	ni	ni	ni	ni	ni	ni
RN_001218	no	REFNigelle_001218.p1	AT4G23650.1	0	CPK3 description:CPK3 [Source:A0A178V4I3]	REFNigelle_001218.p1	Aqcoe7G023000.1.p	0	AT4G23650.1	calcium-dependent protein kinase 6
RN_001219	no	ni	ni	ni	ni	ni	ni	ni	ni	ni
RN_001220	no	REFNigelle_001220.p1	AT3G57520.1	0	RFS2 description:Probable galactinol--sucrose galactosyltransferase 2 [Source:Q94A08]	REFNigelle_001220.p1	Aqcoe2G020700.4.p	0	AT3G57520.1	seed imbibition 2
RN_001223	no	REFNigelle_001223.p1	AT5G13550.1	0	SULTR4;1 description:Sulfate transporter 4.1, chloroplastic [Source:Q9FY46]	REFNigelle_001223.p1	Aqcoe1G475700.1.p	0	AT5G13550.1	sulfate transporter 4.1
RN_001224	no	ni	ni	ni	ni	ni	ni	ni	ni	ni
RN_001225	no	ni	ni	ni	ni	ni	ni	ni	ni	ni
RN_001226	no	ni	ni	ni	ni	ni	ni	ni	ni	ni
RN_001227	no	REFNigelle_001227.p1	AT1G74580.3	0	Putative pentatricopeptide repeat-containing protein At1g74580 [Source:UniProtKB/Swiss-Prot;Acc:Q9CA58]	REFNigelle_001227.p1	Aqcoe3G337100.1.p	0	AT1G74580.1	Pentatricopeptide repeat (PPR) superfamily protein
RN_001228	no	ni	ni	ni	ni	ni	ni	ni	ni	ni
RN_001229	no	REFNigelle_001229.p1	AT3G02320.1	5.98e-10	tRNA (guanine(26)-N(2))-dimethyltransferase [Source:UniProtKB/TrEMBL;Acc:A0A178VEZ9]	REFNigelle_001229.p1	Aqcoe7G340500.4.p	1e-13	AT5G15810.1	N2,N2-dimethylguanosine tRNA methyltransferase
RN_001230	no	ni	ni	ni	ni	ni	ni	ni	ni	ni
RN_001232	no	ni	ni	ni	ni	ni	ni	ni	ni	ni
RN_001233	no	ni	ni	ni	ni	ni	ni	ni	ni	ni
RN_001234	yes	REFNigelle_001234.p3	AT1G12230.1	9.51e-96	Aldolase superfamily protein [Source:UniProtKB/TrEMBL;Acc:F4IC59]	REFNigelle_001234.p3	Aqcoe7G078800.1.p	6e-96	AT1G12230.1	Aldolase superfamily protein
RN_001235	no	ni	ni	ni	ni	ni	ni	ni	ni	ni
RN_001236	no	ni	ni	ni	ni	ni	ni	ni	ni	ni
RN_001237	no	REFNigelle_001237.p1	AT3G08960.3	0	ARM repeat superfamily protein [Source:UniProtKB/TrEMBL;Acc:F4IYK6]	REFNigelle_001237.p1	Aqcoe7G324700.1.p	0	AT3G08960.1	ARM repeat superfamily protein
RN_001238	yes	REFNigelle_001238.p1	ATMG00860.1	2.75e-26	ORF158 description:Uncharacterized mitochondrial protein AtMg00860 [Source:P92523]	REFNigelle_001238.p1	Aqcoe7G257100.1.p	5e-12	ATMG00860.1	DNA/RNA polymerases superfamily protein
RN_001239	no	REFNigelle_001239.p1	AT3G42170.1	7.45e-25	HAT description:DAYSLEEPER [Source:A0A178VJS5]	REFNigelle_001239.p1	Aqcoe3G393700.1.p	2e-14	AT1G18560.1	BED zinc finger ;hAT family dimerisation domain
RN_001240	yes	ni	ni	ni	ni	ni	ni	ni	ni	ni
RN_001241	no	ni	ni	ni	ni	ni	ni	ni	ni	ni
RN_001242	no	ni	ni	ni	ni	ni	ni	ni	ni	ni
RN_001243	no	ni	ni	ni	ni	ni	ni	ni	ni	ni
RN_001244	no	REFNigelle_001244.p1	AT1G52510.1	0	Alpha/beta-Hydrolases superfamily protein [Source:UniProtKB/TrEMBL;Acc:Q8VZ57]	REFNigelle_001244.p1	Aqcoe6G314800.2.p	0	AT1G52510.1	alpha/beta-Hydrolases superfamily protein
RN_001245	no	REFNigelle_001245.p1	AT4G16765.6	2.95e-90	2-oxoglutarate (2OG) and Fe(II)-dependent oxygenase superfamily protein [Source:UniProtKB/TrEMBL;Acc:A1A6I8]	REFNigelle_001245.p1	Aqcoe3G275100.3.p	2e-107	AT4G16770.1	2-oxoglutarate (2OG) and Fe(II)-dependent oxygenase superfamily protein
RN_001246	no	ni	ni	ni	ni	ni	ni	ni	ni	ni
RN_001247	yes	ni	ni	ni	ni	ni	ni	ni	ni	ni
RN_001248	no	REFNigelle_001248.p2	AT1G21280.1	2.69e-13	Copia-like polyprotein/retrotransposon [Source:UniProtKB/TrEMBL;Acc:Q84JT5]	REFNigelle_001248.p2	Aqcoe4G116300.1.p	4e-10	AT1G21280.1	0
RN_001249	no	ni	ni	ni	ni	ni	ni	ni	ni	ni
RN_001250	no	ni	ni	ni	ni	ni	ni	ni	ni	ni
RN_001251	no	ni	ni	ni	ni	ni	ni	ni	ni	ni
RN_001252	no	ni	ni	ni	ni	ni	ni	ni	ni	ni
RN_001253	no	ni	ni	ni	ni	ni	ni	ni	ni	ni
RN_001254	no	REFNigelle_001254.p1	AT3G21250.6	0	MRP6 description:Multidrug resistance-associated protein 6 [Source:A0A1I9LPV5]	REFNigelle_001254.p1	Aqcoe7G413500.2.p	0	AT3G21250.2	multidrug resistance-associated protein 6
RN_001255	no	REFNigelle_001255.p1	AT3G21250.6	9.72e-70	MRP6 description:Multidrug resistance-associated protein 6 [Source:A0A1I9LPV5]	REFNigelle_001255.p1	Aqcoe7G413500.2.p	2e-110	AT3G21250.2	multidrug resistance-associated protein 6
RN_001257	no	REFNigelle_001257.p1	AT3G14840.2	0	LRR-RLK description:Probable leucine-rich repeat receptor-like serine/threonine-protein kinase At3g14840 [Source:C0LGN2]	REFNigelle_001257.p1	Aqcoe4G025700.1.p	0	AT3G14840.2	Leucine-rich repeat transmembrane protein kinase
RN_001258	no	REFNigelle_001258.p1	AT3G14840.2	0	LRR-RLK description:Probable leucine-rich repeat receptor-like serine/threonine-protein kinase At3g14840 [Source:C0LGN2]	REFNigelle_001258.p1	Aqcoe4G025700.1.p	0	AT3G14840.2	Leucine-rich repeat transmembrane protein kinase
RN_001259	no	REFNigelle_001259.p1	AT1G07650.4	8.91e-60	Leucine-rich repeat transmembrane protein kinase [Source:UniProtKB/TrEMBL;Acc:F4HSE1]	REFNigelle_001259.p1	Aqcoe4G025700.1.p	1e-100	AT3G14840.2	Leucine-rich repeat transmembrane protein kinase
RN_001260	no	ni	ni	ni	ni	ni	ni	ni	ni	ni
RN_001261	no	ni	ni	ni	ni	ni	ni	ni	ni	ni
RN_001262	no	REFNigelle_001262.p1	AT5G45690.1	1.32e-36	OBAP2A description:Oil body-associated protein 2A [Source:Q941A4]	REFNigelle_001262.p1	Aqcoe5G007600.1.p	5e-67	AT5G45690.1	Protein of unknown function (DUF1264)
RN_001263	no	REFNigelle_001263.p1	AT1G07780.9	2.86e-108	PAI1 description:N-(5'-phosphoribosyl)anthranilate isomerase 1, chloroplastic [Source:Q42440]	REFNigelle_001263.p1	Aqcoe1G418000.1.p	7e-128	AT1G07780.2	phosphoribosylanthranilate isomerase 1
RN_001264	no	ni	ni	ni	ni	ni	ni	ni	ni	ni
RN_001265	no	REFNigelle_001265.p1	AT2G26350.1	0	PEX10 description:PEX10 [Source:A0A178VWJ2]	REFNigelle_001265.p1	Aqcoe3G201300.1.p	0	AT2G26350.1	peroxin 10
RN_001266	no	REFNigelle_001266.p1	AT2G40890.1	9.59e-27	CYP98A3 description:Cytochrome P450 98A3 [Source:O22203]	REFNigelle_001266.p1	Aqcoe4G080200.1.p	3e-57	AT5G07990.1	Cytochrome P450 superfamily protein
RN_001267	no	ni	ni	ni	ni	ni	ni	ni	ni	ni
RN_001268	no	ni	ni	ni	ni	ni	ni	ni	ni	ni
RN_001269	no	REFNigelle_001269.p1	AT5G16920.1	8.58e-49	At5g16920 [Source:UniProtKB/TrEMBL;Acc:Q1PDW1]	REFNigelle_001269.p1	Aqcoe3G172400.1.p	6e-104	AT5G16920.1	Fasciclin-like arabinogalactan family protein
RN_001270	no	ni	ni	ni	ni	ni	ni	ni	ni	ni
RN_001271	no	ni	ni	ni	ni	ni	ni	ni	ni	ni
RN_001273	no	ni	ni	ni	ni	ni	ni	ni	ni	ni
RN_001274	no	ni	ni	ni	ni	REFNigelle_001274.p1	Aqcoe1G465600.3.p	4e-26	0	0
RN_001275	no	REFNigelle_001275.p1	AT2G45590.1	5.33e-83	Receptor-like serine/threonine-protein kinase At2g45590 [Source:UniProtKB/Swiss-Prot;Acc:O64639]	REFNigelle_001275.p1	Aqcoe7G055900.1.p	3e-127	AT2G45590.1	Protein kinase superfamily protein
RN_001276	no	REFNigelle_001276.p1	AT1G68840.2	1.21e-140	RAV2 description:TEM2 [Source:A0A178WNP0]	REFNigelle_001276.p1	Aqcoe3G396900.1.p	0	AT1G13260.1	related to ABI3/VP1 1
RN_001277	no	REFNigelle_001277.p1	AT3G24255.7	5.21e-11	RNA-directed DNA polymerase (Reverse transcriptase)-related family protein [Source:UniProtKB/TrEMBL;Acc:A0A1I9LSY4]	REFNigelle_001277.p1	Aqcoe6G207800.1.p	2e-13	ATMG00310.1	RNA-directed DNA polymerase (reverse transcriptase)-related family protein
RN_001278	no	ni	ni	ni	ni	ni	ni	ni	ni	ni
RN_001279	no	REFNigelle_001279.p1	AT1G72100.1	1.13e-15	Late embryogenesis abundant domain-containing protein / LEA domain-containing protein [Source:UniProtKB/TrEMBL;Acc:Q9C7H3]	REFNigelle_001279.p1	Aqcoe6G007300.1.p	2e-24	AT1G22600.1	Late embryogenesis abundant protein (LEA) family protein
RN_001280	no	REFNigelle_001280.p1	AT3G27950.1	7e-119	GDSL-like Lipase/Acylhydrolase superfamily protein [Source:TAIR;Acc:AT3G27950]	REFNigelle_001280.p1	Aqcoe3G141200.1.p	6e-118	AT5G14450.1	GDSL-like Lipase/Acylhydrolase superfamily protein
RN_001281	no	REFNigelle_001281.p1	AT1G47550.1	0	SEC3A description:Exocyst complex component sec3A [Source:F4HTA1]	REFNigelle_001281.p1	Aqcoe5G203600.1.p	0	AT1G47550.1	exocyst complex component sec3A
RN_001283	no	ni	ni	ni	ni	ni	ni	ni	ni	ni
RN_001284	no	REFNigelle_001284.p1	AT4G38180.1	1.41e-154	FRS5 description:Protein FAR1-RELATED SEQUENCE 5 [Source:Q9SZL8]	REFNigelle_001284.p1	Aqcoe6G242900.1.p	0	AT4G38180.1	FAR1-related sequence 5
RN_001285	no	REFNigelle_001285.p1	AT4G21570.1	7.74e-148	Protein of unknown function (DUF300) [Source:TAIR;Acc:AT4G21570]	REFNigelle_001285.p1	Aqcoe4G165000.3.p	2e-176	AT4G21570.1	Protein of unknown function (DUF300)
RN_001286	no	REFNigelle_001286.p1	AT3G18520.1	0	HDA15 description:Histone deacetylase [Source:F4J8S1]	REFNigelle_001286.p1	Aqcoe3G049700.2.p	0	AT3G18520.1	histone deacetylase 15
RN_001287	no	ni	ni	ni	ni	ni	ni	ni	ni	ni
RN_001288	no	REFNigelle_001288.p3	AT4G23160.2	2.1e-10	CRK8 description:cysteine-rich RLK (RECEPTOR-like protein kinase) 8 [Source:AT4G23160]	REFNigelle_001288.p1	Aqcoe3G118700.1.p	3e-28	AT1G70370.2	polygalacturonase 2
RN_001289	no	REFNigelle_001289.p2	AT5G11870.1	9.67e-21	Alkaline phytoceramidase (APHC) [Source:UniProtKB/TrEMBL;Acc:F4JZD5]	REFNigelle_001289.p1	Aqcoe1G229300.1.p	9e-35	AT4G35540.1	zinc ion binding;transcription regulators
RN_001290	no	ni	ni	ni	ni	ni	ni	ni	ni	ni
RN_001291	no	REFNigelle_001291.p1	AT1G16240.2	8.9e-98	SYP51 description:SYP51 [Source:A0A178WJ29]	REFNigelle_001291.p1	Aqcoe2G161200.3.p	2e-121	AT1G16240.2	syntaxin of plants 51
RN_001292	no	REFNigelle_001292.p1	AT5G01750.1	8.9e-32	Protein LURP-one-related 15 [Source:UniProtKB/Swiss-Prot;Acc:Q9LZX1]	REFNigelle_001292.p1	Aqcoe1G395300.1.p	2e-37	AT5G01750.2	Protein of unknown function (DUF567)
RN_001293	no	ni	ni	ni	ni	ni	ni	ni	ni	ni
RN_001294	no	REFNigelle_001294.p1	AT2G19130.1	0	G-type lectin S-receptor-like serine/threonine-protein kinase At2g19130 [Source:UniProtKB/Swiss-Prot;Acc:O64477]	REFNigelle_001294.p1	Aqcoe4G097500.1.p	0	AT2G19130.1	S-locus lectin protein kinase family protein
RN_001296	no	REFNigelle_001296.p1	AT3G28480.1	6.32e-153	Oxoglutarate/iron-dependent oxygenase [Source:UniProtKB/TrEMBL;Acc:F4J0A6]	REFNigelle_001296.p1	Aqcoe3G316900.1.p	3e-176	AT3G28480.1	Oxoglutarate/iron-dependent oxygenase
RN_001297	no	REFNigelle_001297.p1	AT2G46270.3	4e-100	GBF3 description:G-box-binding factor 3 [Source:P42776]	REFNigelle_001297.p1	Aqcoe5G443700.2.p	1e-165	AT2G46270.1	G-box binding factor 3
RN_001298	no	REFNigelle_001298.p1	AT2G43980.1	8.25e-166	ITPK4 description:Inositol 1,3,4-trisphosphate 5/6-kinase 4 [Source:O80568]	REFNigelle_001298.p1	Aqcoe2G138800.1.p	0	AT2G43980.1	inositol 1,3,4-trisphosphate 5/6-kinase 4
RN_001299	no	ni	ni	ni	ni	ni	ni	ni	ni	ni
RN_001301	no	REFNigelle_001301.p1	AT2G18196.1	8.19e-15	HIPP30 description:Heavy metal-associated isoprenylated plant protein 30 [Source:F4IQG4]	REFNigelle_001301.p1	Aqcoe5G473200.1.p	3e-16	AT2G18196.1	Heavy metal transport/detoxification superfamily protein
RN_001302	no	REFNigelle_001302.p1	AT2G44150.1	6.27e-160	ASHH3 description:SDG7 [Source:A0A178VNH9]	REFNigelle_001302.p1	Aqcoe2G172400.2.p	0	AT2G44150.1	histone-lysine N-methyltransferase ASHH3
RN_001303	no	REFNigelle_001303.p1	AT3G49000.1	5.43e-120	At3g49000 [Source:UniProtKB/TrEMBL;Acc:Q8LPK6]	REFNigelle_001303.p1	Aqcoe3G342400.2.p	0	AT3G49000.1	RNA polymerase III subunit RPC82 family protein
RN_001304	no	REFNigelle_001304.p1	AT3G04710.1	7.53e-114	TPR10 description:Ankyrin repeat family protein [Source:F4J4V1]	REFNigelle_001304.p1	Aqcoe3G331600.2.p	2e-136	AT3G04710.1	ankyrin repeat family protein
RN_001305	no	ni	ni	ni	ni	ni	ni	ni	ni	ni
RN_001306	no	ni	ni	ni	ni	ni	ni	ni	ni	ni
RN_001307	no	REFNigelle_001307.p1	AT1G75660.1	0	XRN3 description:5'-3' exoribonuclease 3 [Source:Q9FQ03]	REFNigelle_001307.p1	Aqcoe5G207000.1.p	0	AT1G75660.1	5\'-3\' exoribonuclease 3
RN_001308	no	REFNigelle_001308.p1	AT2G32040.1	0	Folate-biopterin transporter 1, chloroplastic [Source:UniProtKB/Swiss-Prot;Acc:Q9SKZ5]	REFNigelle_001308.p1	Aqcoe5G052700.1.p	0	AT2G32040.1	Major facilitator superfamily protein
RN_001309	yes	REFNigelle_001309.p2	AT3G24255.4	1.4e-28	RNA-directed DNA polymerase (Reverse transcriptase)-related family protein [Source:UniProtKB/TrEMBL;Acc:A0A1I9LSY4]	REFNigelle_001309.p1	Aqcoe4G244400.1.p	2e-33	AT1G43760.1	DNAse I-like superfamily protein
RN_001310	no	REFNigelle_001310.p1	AT1G69523.1	1.83e-96	At1g69520/F10D13_17 [Source:UniProtKB/TrEMBL;Acc:Q941B1]	REFNigelle_001310.p1	Aqcoe5G445400.1.p	4e-139	AT1G69523.1	S-adenosyl-L-methionine-dependent methyltransferases superfamily protein
RN_001311	no	ni	ni	ni	ni	ni	ni	ni	ni	ni
RN_001312	no	ni	ni	ni	ni	ni	ni	ni	ni	ni
RN_001313	no	REFNigelle_001313.p1	AT2G21280.1	2.43e-20	GC1 description:NAD(P)-binding Rossmann-fold superfamily protein [Source:AT2G21280]	REFNigelle_001313.p2	Aqcoe6G246300.1.p	5e-81	AT2G21280.1	NAD(P)-binding Rossmann-fold superfamily protein
RN_001314	no	ni	ni	ni	ni	ni	ni	ni	ni	ni
RN_001315	no	REFNigelle_001315.p1	AT1G12580.1	0	PEPKR1 description:PEPKR1 [Source:A0A178WE53]	REFNigelle_001315.p1	Aqcoe7G050500.1.p	0	AT1G12580.1	phosphoenolpyruvate carboxylase-related kinase 1
RN_001316	no	REFNigelle_001316.p1	AT1G17330.1	1.98e-51	At1g17330 [Source:UniProtKB/TrEMBL;Acc:Q8GUM8]	REFNigelle_001316.p1	Aqcoe3G434300.5.p	1e-56	AT1G17330.1	Metal-dependent phosphohydrolase
RN_001317	no	REFNigelle_001317.p1	AT2G14520.2	0	CBSDUF3 description:DUF21 domain-containing protein At2g14520 [Source:Q9ZQR4]	REFNigelle_001317.p1	Aqcoe5G095600.1.p	0	AT2G14520.1	CBS domain-containing protein with a domain of unknown function (DUF21)
RN_001319	no	REFNigelle_001319.p1	AT3G18620.1	5.55e-134	PAT11 description:S-acyltransferase [Source:A0A178V949]	REFNigelle_001319.p1	Aqcoe3G436400.1.p	4e-171	AT3G18620.1	DHHC-type zinc finger family protein
RN_001320	no	REFNigelle_001320.p1	AT5G22620.1	5.07e-146	Probable 2-carboxy-D-arabinitol-1-phosphatase [Source:UniProtKB/Swiss-Prot;Acc:Q9FNJ9]	REFNigelle_001320.p1	Aqcoe2G127600.1.p	0	AT5G22620.1	phosphoglycerate/bisphosphoglycerate mutase family protein
RN_001321	no	ni	ni	ni	ni	ni	ni	ni	ni	ni
RN_001322	no	REFNigelle_001322.p1	AT1G47490.1	7.89e-170	RBP47C description:Polyadenylate-binding protein RBP47C [Source:Q9SX79]	REFNigelle_001322.p1	Aqcoe5G158100.3.p	0	AT1G47490.1	RNA-binding protein 47C
RN_001323	no	ni	ni	ni	ni	ni	ni	ni	ni	ni
RN_001324	no	REFNigelle_001324.p1	AT5G16490.1	7.96e-33	RIC4 description:CRIB domain-containing protein RIC4 [Source:Q9FFD5]	REFNigelle_001324.p1	Aqcoe2G427100.1.p	5e-83	AT5G16490.1	ROP-interactive CRIB motif-containing protein 4
RN_001325	no	ni	ni	ni	ni	ni	ni	ni	ni	ni
RN_001326	no	REFNigelle_001326.p1	AT3G05675.2	7.15e-128	BTB/POZ domain-containing protein [Source:UniProtKB/TrEMBL;Acc:A0A178VMR2]	REFNigelle_001326.p1	Aqcoe7G004900.1.p	0	AT3G05675.1	BTB/POZ domain-containing protein
RN_001328	yes	REFNigelle_001328.p1	AT1G56120.3	4.31e-63	Leucine-rich repeat transmembrane protein kinase [Source:UniProtKB/TrEMBL;Acc:F4I3K0]	REFNigelle_001328.p1	Aqcoe6G059400.1.p	3e-92	AT1G70520.1	cysteine-rich RLK (RECEPTOR-like protein kinase) 2
RN_001329	no	ni	ni	ni	ni	ni	ni	ni	ni	ni
RN_001330	no	REFNigelle_001330.p1	AT2G39780.1	3.06e-101	RNS2 description:Ribonuclease 2 [Source:P42814]	REFNigelle_001330.p1	Aqcoe3G417000.1.p	1e-115	AT2G39780.1	ribonuclease 2
RN_001331	no	REFNigelle_001331.p1	AT1G55280.1	2.83e-98	Lipase/lipooxygenase, PLAT/LH2 family protein [Source:TAIR;Acc:AT1G55280]	REFNigelle_001331.p1	Aqcoe1G050700.2.p	3e-133	AT1G55280.1	Lipase/lipooxygenase, PLAT/LH2 family protein
RN_001332	no	REFNigelle_001332.p1	AT1G32410.3	1.52e-60	Vacuolar protein sorting-associated protein 55 homolog [Source:UniProtKB/Swiss-Prot;Acc:Q9AST6]	REFNigelle_001332.p1	Aqcoe2G376900.1.p	1e-68	AT1G32410.1	Vacuolar protein sorting 55 (VPS55) family protein
RN_001333	no	REFNigelle_001333.p1	AT1G67600.1	1.34e-56	Acid phosphatase/vanadium-dependent haloperoxidase-related protein [Source:UniProtKB/TrEMBL;Acc:Q9FXC5]	REFNigelle_001333.p1	Aqcoe3G189100.1.p	8e-69	AT1G67600.1	Acid phosphatase/vanadium-dependent haloperoxidase-related protein
RN_001334	no	REFNigelle_001334.p1	AT5G52030.1	2.29e-110	TraB family protein [Source:UniProtKB/TrEMBL;Acc:Q9FJ89]	REFNigelle_001334.p1	Aqcoe7G048800.1.p	9e-141	AT5G52030.2	TraB family protein
RN_001335	no	ni	ni	ni	ni	ni	ni	ni	ni	ni
RN_001336	no	ni	ni	ni	ni	REFNigelle_001336.p1	Aqcoe7G024800.1.p	0	0	0
RN_001337	no	REFNigelle_001337.p1	AT2G39720.2	1.78e-90	RHC2A description:Probable E3 ubiquitin-protein ligase RHC2A [Source:O22283]	REFNigelle_001337.p1	Aqcoe1G105300.1.p	1e-95	AT5G59550.1	zinc finger (C3HC4-type RING finger) family protein
RN_001338	no	REFNigelle_001338.p1	AT2G39340.1	0	SAC3A description:SAC3 family protein A [Source:F4IUY8]	REFNigelle_001338.p1	Aqcoe5G160900.1.p	0	AT2G39340.1	SAC3/GANP/Nin1/mts3/eIF-3 p25 family
RN_001339	no	REFNigelle_001339.p1	AT5G07810.1	0	SNF2 domain-containing protein / helicase domain-containing protein / HNH endonuclease domain-containing protein [Source:TAIR;Acc:AT5G07810]	REFNigelle_001339.p1	Aqcoe3G057100.1.p	0	AT5G07810.1	SNF2 domain-containing protein / helicase domain-containing protein / HNH endonuclease domain-containing protein
RN_001340	no	REFNigelle_001340.p1	AT5G19660.2	0	SBT6.1 description:S1P [Source:A0A178UNR0]	REFNigelle_001340.p1	Aqcoe7G175800.1.p	0	AT5G19660.1	SITE-1 protease
RN_001341	no	ni	ni	ni	ni	ni	ni	ni	ni	ni
RN_001342	no	REFNigelle_001342.p1	AT1G25570.1	0	Di-glucose binding protein with Leucine-rich repeat domain-containing protein [Source:UniProtKB/TrEMBL;Acc:F4ICJ5]	REFNigelle_001342.p1	Aqcoe3G050300.1.p	0	AT1G25570.1	Di-glucose binding protein with Leucine-rich repeat domain
RN_001343	no	REFNigelle_001343.p1	AT5G23110.1	0	Zinc finger, C3HC4 type (RING finger) family protein [Source:UniProtKB/TrEMBL;Acc:Q9FN44]	REFNigelle_001343.p1	Aqcoe3G434900.1.p	0	AT5G23110.1	Zinc finger, C3HC4 type (RING finger) family protein
RN_001345	no	ni	ni	ni	ni	ni	ni	ni	ni	ni
RN_001346	no	ni	ni	ni	ni	ni	ni	ni	ni	ni
RN_001347	no	ni	ni	ni	ni	ni	ni	ni	ni	ni
RN_001348	no	ni	ni	ni	ni	ni	ni	ni	ni	ni
RN_001349	no	REFNigelle_001349.p1	AT3G07400.1	0	F21O3.11 protein [Source:UniProtKB/TrEMBL;Acc:Q9SRS6]	REFNigelle_001349.p1	Aqcoe2G409500.3.p	0	AT3G07400.1	lipase class 3 family protein
RN_001350	no	ni	ni	ni	ni	ni	ni	ni	ni	ni
RN_001351	no	ni	ni	ni	ni	ni	ni	ni	ni	ni
RN_001352	no	REFNigelle_001352.p1	AT5G17910.3	1.01e-95	Cardiomyopathy-associated protein [Source:UniProtKB/TrEMBL;Acc:Q9FKN5]	REFNigelle_001352.p1	Aqcoe3G061400.2.p	0	AT5G17910.2	0
RN_001353	no	ni	ni	ni	ni	ni	ni	ni	ni	ni
RN_001355	no	REFNigelle_001355.p1	ATMG00860.1	8.52e-29	ORF158 description:Uncharacterized mitochondrial protein AtMg00860 [Source:P92523]	REFNigelle_001355.p1	Aqcoe6G275700.1.p	6e-29	0	0
RN_001356	no	ni	ni	ni	ni	ni	ni	ni	ni	ni
RN_001357	no	ni	ni	ni	ni	ni	ni	ni	ni	ni
RN_001358	no	ni	ni	ni	ni	ni	ni	ni	ni	ni
RN_001359	no	ni	ni	ni	ni	ni	ni	ni	ni	ni
RN_001360	no	ni	ni	ni	ni	ni	ni	ni	ni	ni
RN_001361	no	ni	ni	ni	ni	ni	ni	ni	ni	ni
RN_001362	no	REFNigelle_001362.p1	AT2G34930.1	1.55e-68	Disease resistance family protein / LRR family protein [Source:UniProtKB/TrEMBL;Acc:O64757]	REFNigelle_001362.p1	Aqcoe3G127800.1.p	6e-101	AT2G34930.1	disease resistance family protein / LRR family protein
RN_001363	no	REFNigelle_001363.p1	AT3G24255.7	5.57e-24	RNA-directed DNA polymerase (Reverse transcriptase)-related family protein [Source:UniProtKB/TrEMBL;Acc:A0A1I9LSY4]	REFNigelle_001363.p1	Aqcoe7G262900.1.p	2e-19	AT4G29090.1	Ribonuclease H-like superfamily protein
RN_001364	no	ni	ni	ni	ni	ni	ni	ni	ni	ni
RN_001365	no	ni	ni	ni	ni	ni	ni	ni	ni	ni
RN_001366	no	REFNigelle_001366.p2	AT3G62260.1	3.68e-22	Probable protein phosphatase 2C 49 [Source:UniProtKB/Swiss-Prot;Acc:Q3EAF9]	REFNigelle_001366.p2	Aqcoe2G260900.1.p	4e-34	AT3G62260.1	Protein phosphatase 2C family protein
RN_001367	yes	ni	ni	ni	ni	ni	ni	ni	ni	ni
RN_001369	no	ni	ni	ni	ni	ni	ni	ni	ni	ni
RN_001370	no	REFNigelle_001370.p1	AT5G17250.1	8.58e-155	Alkaline-phosphatase-like family protein [Source:TAIR;Acc:AT5G17250]	REFNigelle_001370.p1	Aqcoe2G110700.2.p	0	AT5G17250.1	Alkaline-phosphatase-like family protein
RN_001371	no	REFNigelle_001371.p1	AT2G25760.1	0	Protein kinase family protein [Source:UniProtKB/TrEMBL;Acc:F4ISN5]	REFNigelle_001371.p1	Aqcoe7G156600.1.p	0	AT2G25760.1	Protein kinase family protein
RN_001372	no	REFNigelle_001372.p1	AT1G20980.1	0	SPL14 description:Squamosa promoter-binding-like protein 14 [Source:Q8RY95]	REFNigelle_001372.p1	Aqcoe5G111900.2.p	0	AT1G20980.1	squamosa promoter binding protein-like 14
RN_001373	no	ni	ni	ni	ni	ni	ni	ni	ni	ni
RN_001374	no	REFNigelle_001374.p1	AT4G17550.1	0	Putative glycerol-3-phosphate transporter 4 [Source:UniProtKB/Swiss-Prot;Acc:O23596]	REFNigelle_001374.p1	Aqcoe3G262700.1.p	0	AT4G17550.1	Major facilitator superfamily protein
RN_001376	no	ni	ni	ni	ni	ni	ni	ni	ni	ni
RN_001378	no	ni	ni	ni	ni	ni	ni	ni	ni	ni
RN_001379	no	REFNigelle_001379.p1	AT2G20740.1	3.49e-76	TOM2AH3 description:Tetraspanin-19 [Source:Q940P5]	REFNigelle_001379.p1	Aqcoe1G273900.1.p	4e-90	AT2G20740.1	Tetraspanin family protein
RN_001380	no	REFNigelle_001380.p1	AT5G63000.1	1.08e-98	Mitochondrial import inner membrane translocase subunit Tim17/Tim22/Tim23 family protein [Source:UniProtKB/TrEMBL;Acc:Q84K84]	REFNigelle_001380.p1	Aqcoe3G282300.2.p	3e-113	AT5G63000.1	Mitochondrial import inner membrane translocase subunit Tim17/Tim22/Tim23 family protein
RN_001381	no	REFNigelle_001381.p1	AT5G64010.1	3.03e-45	unknown protein; FUNCTIONS IN: molecular_function unknown; INVOLVED IN:AT5G64010]	REFNigelle_001381.p1	Aqcoe6G029100.1.p	2e-98	AT5G64010.1	0
RN_001382	no	ni	ni	ni	ni	ni	ni	ni	ni	ni
RN_001383	no	ni	ni	ni	ni	ni	ni	ni	ni	ni
RN_001384	no	ni	ni	ni	ni	ni	ni	ni	ni	ni
RN_001385	no	ni	ni	ni	ni	ni	ni	ni	ni	ni
RN_001386	no	REFNigelle_001386.p1	AT4G04780.1	2.85e-64	MED21 description:Mediator of RNA polymerase II transcription subunit 21 [Source:C0LU16]	REFNigelle_001386.p1	Aqcoe3G257700.1.p	9e-43	AT4G04780.1	mediator 21
RN_001387	no	ni	ni	ni	ni	ni	ni	ni	ni	ni
RN_001388	yes	ni	ni	ni	ni	ni	ni	ni	ni	ni
RN_001389	no	ni	ni	ni	ni	ni	ni	ni	ni	ni
RN_001390	no	ni	ni	ni	ni	ni	ni	ni	ni	ni
RN_001391	no	REFNigelle_001391.p1	AT5G63110.1	0	HDA6 description:Histone deacetylase [Source:B1PXB9]	REFNigelle_001391.p1	Aqcoe7G245700.2.p	0	AT5G63110.1	histone deacetylase 6
RN_001392	no	REFNigelle_001392.p1	AT5G50530.1	0	CBSCBSPB4 description:CBS domain-containing protein CBSCBSPB5 [Source:P0DH79]	REFNigelle_001392.p1	Aqcoe5G353000.1.p	0	AT5G50530.1	CBS / octicosapeptide/Phox/Bemp1 (PB1) domains-containing protein
RN_001394	no	REFNigelle_001394.p1	AT1G09195.2	4.7e-180	FUNCTIONS IN: molecular_function unknown; INVOLVED IN:AT1G09195]	REFNigelle_001394.p1	Aqcoe2G280600.2.p	0	AT1G09195.2	0
RN_001395	no	ni	ni	ni	ni	ni	ni	ni	ni	ni
RN_001396	no	ni	ni	ni	ni	ni	ni	ni	ni	ni
RN_001398	no	ni	ni	ni	ni	ni	ni	ni	ni	ni
RN_001399	no	ni	ni	ni	ni	ni	ni	ni	ni	ni
RN_001400	no	REFNigelle_001400.p1	AT1G22180.4	2.48e-77	F16L1.9 protein [Source:UniProtKB/TrEMBL;Acc:Q9LM14]	REFNigelle_001400.p1	Aqcoe6G061800.2.p	1e-93	AT1G22180.2	Sec14p-like phosphatidylinositol transfer family protein
RN_001401	no	ni	ni	ni	ni	ni	ni	ni	ni	ni
RN_001402	no	REFNigelle_001402.p1	ATMG00860.1	0.000705	ORF158 description:Uncharacterized mitochondrial protein AtMg00860 [Source:P92523]	REFNigelle_001402.p1	Aqcoe6G275700.1.p	7e-16	0	0
RN_001403	no	REFNigelle_001403.p1	AT5G42950.1	0	GYF domain-containing protein [Source:UniProtKB/TrEMBL;Acc:Q9FMM3]	REFNigelle_001403.p1	Aqcoe5G195700.1.p	0	AT5G42950.1	GYF domain-containing protein
RN_001404	no	REFNigelle_001404.p1	AT1G64150.1	5.16e-123	PAM71 description:Protein PAM71, chloroplastic [Source:Q94AX5]	REFNigelle_001404.p1	Aqcoe5G441200.1.p	5e-143	AT1G64150.1	Uncharacterized protein family (UPF0016)
RN_001407	no	REFNigelle_001407.p1	AT1G02170.1	3.09e-144	AMC1 description:MCP1b [Source:A0A178W8H4]	REFNigelle_001407.p1	Aqcoe3G258500.1.p	7e-146	AT1G02170.1	metacaspase 1
RN_001409	no	ni	ni	ni	ni	ni	ni	ni	ni	ni
RN_001410	no	REFNigelle_001410.p2	AT4G20520.1	4.72e-08	RNA binding / RNA-directed DNA polymerase [Source:UniProtKB/TrEMBL;Acc:Q9SUM7]	REFNigelle_001410.p1	Aqcoe7G254300.1.p	8e-07	AT1G43760.1	DNAse I-like superfamily protein
RN_001411	no	ni	ni	ni	ni	ni	ni	ni	ni	ni
RN_001412	no	REFNigelle_001412.p1	AT2G15010.1	5.59e-08	Probable thionin-2.3 [Source:UniProtKB/Swiss-Prot;Acc:Q8VZK8]	REFNigelle_001412.p1	Aqcoe4G073300.1.p	1e-10	AT1G66100.1	Plant thionin
RN_001415	no	ni	ni	ni	ni	ni	ni	ni	ni	ni
RN_001416	no	ni	ni	ni	ni	ni	ni	ni	ni	ni
RN_001417	no	ni	ni	ni	ni	ni	ni	ni	ni	ni
RN_001418	no	REFNigelle_001418.p1	AT1G53250.1	5.09e-28	unknown protein; BEST Arabidopsis thaliana protein match is: unknown protein (TAIR:AT1G53250]	REFNigelle_001418.p2	Aqcoe4G051300.1.p	5e-46	AT1G53250.1	0
RN_001419	no	REFNigelle_001419.p1	AT5G06440.1	2.34e-109	BEST Arabidopsis thaliana protein match is: Polyketide cyclase/dehydrase and lipid transport superfamily protein (TAIR:AT5G06440]	REFNigelle_001419.p1	Aqcoe1G073800.2.p	0	AT5G06440.3	0
RN_001420	no	ni	ni	ni	ni	ni	ni	ni	ni	ni
RN_001421	no	REFNigelle_001421.p1	AT4G15010.3	1.58e-161	AT4G15010 protein [Source:UniProtKB/TrEMBL;Acc:Q940F4]	REFNigelle_001421.p1	Aqcoe1G409600.2.p	0	AT4G15010.3	Mitochondrial substrate carrier family protein
RN_001422	no	REFNigelle_001422.p1	AT1G77420.1	4.53e-75	Alpha/beta-Hydrolases superfamily protein [Source:UniProtKB/TrEMBL;Acc:Q9FVW6]	REFNigelle_001422.p1	Aqcoe3G036400.1.p	1e-95	AT1G77420.1	alpha/beta-Hydrolases superfamily protein
RN_001424	no	REFNigelle_001424.p1	AT1G77250.1	2.7e-78	At1g77250 [Source:UniProtKB/TrEMBL;Acc:Q1JPM3]	REFNigelle_001424.p1	Aqcoe3G175700.2.p	0	AT1G77250.1	RING/FYVE/PHD-type zinc finger family protein
RN_001425	no	ni	ni	ni	ni	ni	ni	ni	ni	ni
RN_001428	no	ni	ni	ni	ni	ni	ni	ni	ni	ni
RN_001429	no	ni	ni	ni	ni	ni	ni	ni	ni	ni
RN_001430	no	REFNigelle_001430.p1	AT3G21410.1	3.39e-15	FBW1 description:F-box/WD-40 repeat-containing protein 1 [Source:Q4PSN6]	REFNigelle_001430.p1	Aqcoe1G436000.1.p	3e-25	AT4G12560.2	F-box and associated interaction domains-containing protein
RN_001431	no	ni	ni	ni	ni	ni	ni	ni	ni	ni
RN_001432	no	REFNigelle_001432.p1	AT3G24255.4	3.44e-07	RNA-directed DNA polymerase (Reverse transcriptase)-related family protein [Source:UniProtKB/TrEMBL;Acc:A0A1I9LSY4]	ni	ni	ni	ni	ni
RN_001434	no	ni	ni	ni	ni	ni	ni	ni	ni	ni
RN_001435	no	ni	ni	ni	ni	ni	ni	ni	ni	ni
RN_001437	no	REFNigelle_001437.p1	AT3G04610.4	6.24e-170	FLK description:Flowering locus K homology domain [Source:Q9SR13]	REFNigelle_001437.p1	Aqcoe2G364300.2.p	0	AT3G04610.1	RNA-binding KH domain-containing protein
RN_001439	no	REFNigelle_001439.p1	AT5G02310.3	0	PRT6 description:E3 ubiquitin-protein ligase PRT6 [Source:F4KCC2]	REFNigelle_001439.p1	Aqcoe2G150900.3.p	0	AT5G02310.1	proteolysis 6
RN_001440	no	REFNigelle_001440.p1	AT3G63530.1	7.52e-57	BB description:BB2 [Source:A0A178VG02]	REFNigelle_001440.p1	Aqcoe1G021300.1.p	2e-100	AT3G63530.2	RING/U-box superfamily protein
RN_001442	no	ni	ni	ni	ni	ni	ni	ni	ni	ni
RN_001443	no	REFNigelle_001443.p1	ATMG00860.1	4.64e-35	ORF158 description:Uncharacterized mitochondrial protein AtMg00860 [Source:P92523]	REFNigelle_001443.p1	Aqcoe7G257100.1.p	8e-17	ATMG00860.1	DNA/RNA polymerases superfamily protein
RN_001446	yes	ni	ni	ni	ni	ni	ni	ni	ni	ni
RN_001447	no	ni	ni	ni	ni	ni	ni	ni	ni	ni
RN_001449	no	REFNigelle_001449.p1	AT1G45207.3	1.22e-143	Remorin family protein [Source:UniProtKB/TrEMBL;Acc:F4HRB5]	REFNigelle_001449.p1	Aqcoe5G151200.2.p	0	AT1G45207.2	Remorin family protein
RN_001452	no	ni	ni	ni	ni	ni	ni	ni	ni	ni
RN_001453	no	ni	ni	ni	ni	ni	ni	ni	ni	ni
RN_001454	no	ni	ni	ni	ni	ni	ni	ni	ni	ni
RN_001455	no	REFNigelle_001455.p1	AT5G07900.1	5.74e-64	Mitochondrial transcription termination factor family protein [Source:UniProtKB/TrEMBL;Acc:Q9SD94]	REFNigelle_001455.p1	Aqcoe7G126100.1.p	1e-115	AT5G07900.1	Mitochondrial transcription termination factor family protein
RN_001458	no	REFNigelle_001458.p1	AT3G03480.1	1.91e-35	CHAT description:(Z)-3-hexen-1-ol acetyltransferase [Source:Q9SRQ2]	REFNigelle_001458.p1	Aqcoe1G270100.1.p	9e-47	AT3G03480.1	acetyl CoA:(Z)-3-hexen-1-ol acetyltransferase
RN_001459	no	REFNigelle_001459.p1	AT2G45690.1	1.4e-80	PEX16 description:Peroxisome biogenesis protein 16 [Source:Q8S8S1]	REFNigelle_001459.p1	Aqcoe7G051700.1.p	7e-124	AT2G45690.1	shrunken seed protein (SSE1)
RN_001463	no	ni	ni	ni	ni	ni	ni	ni	ni	ni
RN_001464	no	ni	ni	ni	ni	ni	ni	ni	ni	ni
RN_001465	no	REFNigelle_001465.p1	AT5G01990.1	0	PILS6 description:Protein PIN-LIKES 6 [Source:Q9LZN2]	REFNigelle_001465.p1	Aqcoe0017s0003.1.p	0	AT5G01990.1	Auxin efflux carrier family protein
RN_001467	no	REFNigelle_001467.p1	AT3G24255.3	8.8e-24	RNA-directed DNA polymerase (Reverse transcriptase)-related family protein [Source:UniProtKB/TrEMBL;Acc:A0A1I9LSY4]	REFNigelle_001467.p1	Aqcoe7G048600.1.p	5e-26	ATMG00310.1	RNA-directed DNA polymerase (reverse transcriptase)-related family protein
RN_001468	no	ni	ni	ni	ni	ni	ni	ni	ni	ni
RN_001469	no	ni	ni	ni	ni	ni	ni	ni	ni	ni
RN_001470	no	REFNigelle_001470.p1	AT4G21110.2	2.58e-96	AT4g21110/F7J7_50 [Source:UniProtKB/TrEMBL;Acc:O49553]	REFNigelle_001470.p1	Aqcoe2G429700.2.p	9e-107	AT4G21110.1	G10 family protein
RN_001471	no	ni	ni	ni	ni	ni	ni	ni	ni	ni
RN_001473	no	ni	ni	ni	ni	ni	ni	ni	ni	ni
RN_001474	no	REFNigelle_001474.p1	AT4G38870.1	7.41e-15	Putative F-box protein At4g38870 [Source:UniProtKB/Swiss-Prot;Acc:Q9T0J4]	REFNigelle_001474.p1	Aqcoe3G418000.1.p	2e-46	AT4G12560.1	F-box and associated interaction domains-containing protein
RN_001475	no	REFNigelle_001475.p2	AT1G47530.1	2.91e-39	DTX33 description:Protein DETOXIFICATION 33 [Source:Q9SX83]	REFNigelle_001475.p1	Aqcoe3G225000.2.p	2e-66	AT1G47530.1	MATE efflux family protein
RN_001477	yes	ni	ni	ni	ni	ni	ni	ni	ni	ni
RN_001478	no	ni	ni	ni	ni	ni	ni	ni	ni	ni
RN_001479	no	ni	ni	ni	ni	ni	ni	ni	ni	ni
RN_001480	no	REFNigelle_001480.p1	AT5G08420.1	7.43e-165	KRR1 small subunit processome component [Source:UniProtKB/TrEMBL;Acc:A0A178UIZ9]	REFNigelle_001480.p1	Aqcoe4G002700.1.p	2e-157	AT5G08420.1	RNA-binding KH domain-containing protein
RN_001481	no	ni	ni	ni	ni	ni	ni	ni	ni	ni
RN_001482	yes	REFNigelle_001482.p1	AT1G66930.2	5.89e-13	LRK10L-2.7 description:Protein kinase superfamily protein [Source:AT1G66930]	REFNigelle_001482.p1	Aqcoe2G401200.1.p	2e-34	AT1G67000.1	Protein kinase superfamily protein
RN_001483	no	ni	ni	ni	ni	ni	ni	ni	ni	ni
RN_001484	no	REFNigelle_001484.p1	AT4G38630.1	6.47e-170	RPN10 description:RPN10 [Source:A0A178V4I4]	REFNigelle_001484.p1	Aqcoe6G213800.2.p	0	AT4G38630.1	regulatory particle non-ATPase 10
RN_001486	no	REFNigelle_001486.p1	AT4G23160.2	1.42e-32	CRK8 description:cysteine-rich RLK (RECEPTOR-like protein kinase) 8 [Source:AT4G23160]	ni	ni	ni	ni	ni
RN_001487	no	REFNigelle_001487.p1	AT5G16486.1	1.27e-05	RNA-directed DNA polymerase (Reverse transcriptase)-related family protein [Source:UniProtKB/TrEMBL;Acc:Q1G3F8]	REFNigelle_001487.p1	Aqcoe6G294200.1.p	9e-08	AT3G25270.1	Ribonuclease H-like superfamily protein
RN_001488	no	ni	ni	ni	ni	ni	ni	ni	ni	ni
RN_001489	no	REFNigelle_001489.p1	AT2G03430.1	9.79e-18	Ankyrin repeat family protein [Source:UniProtKB/TrEMBL;Acc:Q8GZ22]	REFNigelle_001489.p1	Aqcoe5G069100.1.p	0	AT2G03430.1	Ankyrin repeat family protein
RN_001490	no	REFNigelle_001490.p1	AT1G62350.2	2.63e-119	Pentatricopeptide repeat (PPR) superfamily protein [Source:TAIR;Acc:AT1G62350]	REFNigelle_001490.p1	Aqcoe1G149900.1.p	4e-129	AT1G62350.1	Pentatricopeptide repeat (PPR) superfamily protein
RN_001491	no	REFNigelle_001491.p2	AT4G16130.1	9.8e-23	ARA1 description:L-arabinokinase [Source:O23461]	REFNigelle_001491.p2	Aqcoe4G048800.1.p	9e-33	AT4G16130.1	arabinose kinase
RN_001493	no	ni	ni	ni	ni	ni	ni	ni	ni	ni
RN_001494	no	REFNigelle_001494.p1	AT1G20060.3	2.6e-154	ATP binding microtubule motor family protein [Source:TAIR;Acc:AT1G20060]	REFNigelle_001494.p1	Aqcoe5G212300.3.p	0	AT1G20060.1	ATP binding microtubule motor family protein
RN_001495	no	ni	ni	ni	ni	ni	ni	ni	ni	ni
RN_001497	no	REFNigelle_001497.p1	AT3G59140.1	0	ABCC10 description:ABC transporter C family member 10 [Source:Q9LYS2]	REFNigelle_001497.p1	Aqcoe7G022500.3.p	0	AT3G59140.1	multidrug resistance-associated protein 14
RN_001498	yes	ni	ni	ni	ni	ni	ni	ni	ni	ni
RN_001499	no	REFNigelle_001499.p1	AT1G11870.2	0	OVA7 description:Serine--tRNA ligase, chloroplastic/mitochondrial [Source:Q8RWT8]	REFNigelle_001499.p1	Aqcoe3G246800.1.p	0	AT1G11870.1	Seryl-tRNA synthetase
RN_001502	no	ni	ni	ni	ni	ni	ni	ni	ni	ni
RN_001503	no	ni	ni	ni	ni	ni	ni	ni	ni	ni
RN_001504	no	ni	ni	ni	ni	REFNigelle_001504.p1	Aqcoe7G262100.2.p	3e-21	0	0
RN_001505	no	ni	ni	ni	ni	REFNigelle_001505.p1	Aqcoe4G119600.1.p	1e-13	0	0
RN_001506	no	ni	ni	ni	ni	ni	ni	ni	ni	ni
RN_001508	no	ni	ni	ni	ni	ni	ni	ni	ni	ni
RN_001509	yes	REFNigelle_001509.p1	AT2G01060.1	1.49e-98	PHL7 description:Myb family transcription factor PHL7 [Source:Q9SJW0]	REFNigelle_001509.p1	Aqcoe7G341000.2.p	3e-122	AT2G01060.1	myb-like HTH transcriptional regulator family protein
RN_001510	no	REFNigelle_001510.p1	AT3G28430.1	0	TT9 description:Protein TRANSPARENT TESTA 9 [Source:Q8W4P9]	REFNigelle_001510.p1	Aqcoe7G262700.1.p	0	AT3G28430.1	0
RN_001511	no	REFNigelle_001511.p1	AT1G78790.3	2.16e-47	MHF2 description:Protein MHF2 homolog [Source:Q8L7N3]	REFNigelle_001511.p1	Aqcoe5G384700.1.p	1e-46	AT1G78790.1	0
RN_001512	no	ni	ni	ni	ni	ni	ni	ni	ni	ni
RN_001513	no	ni	ni	ni	ni	ni	ni	ni	ni	ni
RN_001514	no	ni	ni	ni	ni	ni	ni	ni	ni	ni
RN_001518	no	ni	ni	ni	ni	ni	ni	ni	ni	ni
RN_001519	no	REFNigelle_001519.p1	AT1G02080.3	0	Transcription regulator [Source:UniProtKB/TrEMBL;Acc:F4HVV6]	REFNigelle_001519.p1	Aqcoe7G084600.6.p	0	AT1G02080.2	transcription regulators
RN_001520	yes	REFNigelle_001520.p1	AT2G21140.1	2.59e-39	PRP2 description:Proline-rich protein 2 [Source:Q9SKP9]	REFNigelle_001520.p1	Aqcoe5G210700.1.p	1e-71	AT2G21140.1	proline-rich protein 2
RN_001521	no	ni	ni	ni	ni	ni	ni	ni	ni	ni
RN_001526	no	REFNigelle_001526.p1	AT5G52450.1	0	DTX16 description:Protein DETOXIFICATION [Source:A0A178UMN3]	REFNigelle_001526.p1	Aqcoe3G088800.1.p	0	AT5G52450.1	MATE efflux family protein
RN_001528	no	ni	ni	ni	ni	ni	ni	ni	ni	ni
RN_001530	no	REFNigelle_001530.p1	AT2G40020.2	1.2e-12	Nucleolar histone methyltransferase-related protein [Source:TAIR;Acc:AT2G40020]	REFNigelle_001530.p1	Aqcoe3G290100.2.p	2e-37	AT2G40020.2	Nucleolar histone methyltransferase-related protein
RN_001531	no	ni	ni	ni	ni	ni	ni	ni	ni	ni
RN_001532	no	REFNigelle_001532.p1	AT3G47120.1	3.71e-05	Zinc finger CCCH domain-containing protein 42 [Source:UniProtKB/Swiss-Prot;Acc:Q9SD61]	REFNigelle_001532.p1	Aqcoe5G239800.1.p	3e-149	AT3G18640.1	Zinc finger C-x8-C-x5-C-x3-H type family protein
RN_001533	no	REFNigelle_001533.p1	AT3G19184.1	1.74e-38	AP2/B3-like transcriptional factor family protein [Source:UniProtKB/TrEMBL;Acc:A0A1I9LPB7]	REFNigelle_001533.p1	Aqcoe6G144700.4.p	0	AT3G19184.1	AP2/B3-like transcriptional factor family protein
RN_001534	no	ni	ni	ni	ni	ni	ni	ni	ni	ni
RN_001535	yes	REFNigelle_001535.p1	AT4G21530.1	0	APC4 description:Anaphase-promoting complex subunit 4 [Source:O65418]	REFNigelle_001535.p1	Aqcoe7G325400.1.p	0	AT4G21530.1	Transducin/WD40 repeat-like superfamily protein
RN_001536	no	REFNigelle_001536.p1	AT1G43760.1	1.33e-16	DNAse I-like superfamily protein [Source:UniProtKB/TrEMBL;Acc:F4ICS8]	REFNigelle_001536.p2	Aqcoe7G288600.1.p	2e-30	AT1G43760.1	DNAse I-like superfamily protein
RN_001537	no	REFNigelle_001537.p2	AT3G13750.1	2.53e-12	BGAL1 description:Beta-galactosidase 1 [Source:Q9SCW1]	REFNigelle_001537.p2	Aqcoe7G427600.1.p	3e-16	AT3G13750.1	beta galactosidase 1
RN_001538	no	REFNigelle_001538.p1	AT4G32830.1	2.23e-157	AUR1 description:AUR1 [Source:A0A178V5T5]	REFNigelle_001538.p1	Aqcoe7G144400.1.p	7e-172	AT4G32830.1	ataurora1
RN_001539	no	ni	ni	ni	ni	ni	ni	ni	ni	ni
RN_001540	no	ni	ni	ni	ni	ni	ni	ni	ni	ni
RN_001541	no	ni	ni	ni	ni	ni	ni	ni	ni	ni
RN_001543	no	REFNigelle_001543.p1	AT3G14460.1	2.47e-51	Putative disease resistance protein At3g14460 [Source:UniProtKB/Swiss-Prot;Acc:Q9LRR5]	REFNigelle_001543.p1	Aqcoe6G185400.1.p	7e-126	AT3G14460.1	LRR and NB-ARC domains-containing disease resistance protein
RN_001544	no	REFNigelle_001544.p1	AT2G18390.1	8.35e-114	ARL2 description:TTN5 [Source:A0A178VQD7]	REFNigelle_001544.p1	Aqcoe5G190900.1.p	2e-117	AT2G18390.1	ADP-ribosylation factor family protein
RN_001545	no	REFNigelle_001545.p1	AT5G03050.1	3.76e-35	At5g03050 [Source:UniProtKB/TrEMBL;Acc:Q8GY72]	REFNigelle_001545.p1	Aqcoe5G289600.3.p	2e-29	AT5G03050.1	0
RN_001546	no	ni	ni	ni	ni	ni	ni	ni	ni	ni
RN_001547	no	REFNigelle_001547.p1	AT2G39780.1	7.84e-24	RNS2 description:Ribonuclease 2 [Source:P42814]	REFNigelle_001547.p1	Aqcoe2G063900.1.p	9e-30	AT1G26820.1	ribonuclease 3
RN_001548	no	ni	ni	ni	ni	ni	ni	ni	ni	ni
RN_001550	no	REFNigelle_001550.p1	AT5G38030.1	1.13e-40	DTX30 description:Protein DETOXIFICATION 30 [Source:Q9LS19]	REFNigelle_001550.p1	Aqcoe5G402400.1.p	8e-47	AT3G26590.1	MATE efflux family protein
RN_001553	no	REFNigelle_001553.p1	AT5G48620.6	7.26e-38	RPP8L4 description:Probable disease resistance RPP8-like protein 4 [Source:Q9FJK8]	REFNigelle_001553.p1	Aqcoe3G203300.2.p	5e-161	AT3G46710.1	NB-ARC domain-containing disease resistance protein
RN_001555	no	REFNigelle_001555.p1	AT3G53480.1	3.42e-83	ABCG37 description:ABC transporter G family member 37 [Source:Q9LFH0]	REFNigelle_001555.p1	Aqcoe2G255000.2.p	2e-98	AT3G53480.1	pleiotropic drug resistance 9
RN_001558	no	ni	ni	ni	ni	ni	ni	ni	ni	ni
RN_001559	no	REFNigelle_001559.p1	AT4G32360.1	1e-171	MFDR description:NADPH:Q8W3L1]	REFNigelle_001559.p1	Aqcoe1G035800.3.p	0	AT4G32360.1	Pyridine nucleotide-disulphide oxidoreductase family protein
RN_001560	yes	ni	ni	ni	ni	ni	ni	ni	ni	ni
RN_001561	no	ni	ni	ni	ni	ni	ni	ni	ni	ni
RN_001562	no	REFNigelle_001562.p1	AT1G51965.1	0	ABO5 description:ABA Overly-Sensitive 5 [Source:AT1G51965]	REFNigelle_001562.p1	Aqcoe7G144900.2.p	0	AT1G51965.1	ABA Overly-Sensitive 5
RN_001563	no	ni	ni	ni	ni	ni	ni	ni	ni	ni
RN_001564	no	ni	ni	ni	ni	ni	ni	ni	ni	ni
RN_001565	no	REFNigelle_001565.p1	AT2G20820.1	3.86e-30	Expressed protein [Source:UniProtKB/TrEMBL;Acc:Q9SKT5]	REFNigelle_001565.p1	Aqcoe4G165900.1.p	1e-28	AT2G20820.1	0
RN_001566	no	ni	ni	ni	ni	ni	ni	ni	ni	ni
RN_001567	no	ni	ni	ni	ni	ni	ni	ni	ni	ni
RN_001568	no	REFNigelle_001568.p1	AT1G80700.1	1.01e-10	F23A5.5 [Source:UniProtKB/TrEMBL;Acc:Q9SAI8]	REFNigelle_001568.p1	Aqcoe7G363800.2.p	2e-22	AT1G80700.1	0
RN_001570	no	REFNigelle_001570.p1	AT4G32360.9	2.51e-135	MFDR description:NADPH:Q8W3L1]	REFNigelle_001570.p1	Aqcoe5G160000.4.p	0	AT4G32360.1	Pyridine nucleotide-disulphide oxidoreductase family protein
RN_001571	no	ni	ni	ni	ni	ni	ni	ni	ni	ni
RN_001572	yes	ni	ni	ni	ni	ni	ni	ni	ni	ni
RN_001574	no	REFNigelle_001574.p1	AT5G47310.1	4.13e-105	At5g47310 [Source:UniProtKB/TrEMBL;Acc:Q9LVS8]	REFNigelle_001574.p1	Aqcoe3G270000.3.p	4e-119	AT5G47310.1	PPPDE putative thiol peptidase family protein
RN_001575	no	REFNigelle_001575.p2	AT1G23360.3	1.05e-55	MENG description:2-phytyl-1,4-beta-naphthoquinone methyltransferase, chloroplastic [Source:Q3ED65]	REFNigelle_001575.p2	Aqcoe3G280100.1.p	1e-63	AT1G23360.1	S-adenosyl-L-methionine-dependent methyltransferases superfamily protein
RN_001576	no	ni	ni	ni	ni	ni	ni	ni	ni	ni
RN_001577	no	ni	ni	ni	ni	ni	ni	ni	ni	ni
RN_001578	no	REFNigelle_001578.p1	AT4G00590.1	2.71e-150	Putative threonine aspartase [Source:UniProtKB/Swiss-Prot;Acc:O65268]	REFNigelle_001578.p1	Aqcoe5G434100.1.p	4e-170	AT4G00590.1	N-terminal nucleophile aminohydrolases (Ntn hydrolases) superfamily protein
RN_001579	yes	ni	ni	ni	ni	ni	ni	ni	ni	ni
RN_001581	no	REFNigelle_001581.p1	AT4G04650.1	4.61e-10	AT4g04650 protein [Source:UniProtKB/TrEMBL;Acc:Q9S9V5]	REFNigelle_001581.p1	Aqcoe6G294200.1.p	4e-10	AT3G25270.1	Ribonuclease H-like superfamily protein
RN_001582	no	ni	ni	ni	ni	ni	ni	ni	ni	ni
RN_001583	no	ni	ni	ni	ni	ni	ni	ni	ni	ni
RN_001584	no	ni	ni	ni	ni	ni	ni	ni	ni	ni
RN_001585	yes	ni	ni	ni	ni	ni	ni	ni	ni	ni
RN_001586	no	REFNigelle_001586.p1	AT1G20920.4	0	RH42 description:DEAD-box ATP-dependent RNA helicase 42 [Source:Q8H0U8]	REFNigelle_001586.p1	Aqcoe3G047700.1.p	0	AT1G20920.1	P-loop containing nucleoside triphosphate hydrolases superfamily protein
RN_001587	no	REFNigelle_001587.p1	AT1G20920.4	0	RH42 description:DEAD-box ATP-dependent RNA helicase 42 [Source:Q8H0U8]	REFNigelle_001587.p1	Aqcoe3G047700.1.p	0	AT1G20920.1	P-loop containing nucleoside triphosphate hydrolases superfamily protein
RN_001588	no	REFNigelle_001588.p1	AT2G32560.1	7.45e-143	F-box protein At2g32560 [Source:UniProtKB/Swiss-Prot;Acc:Q8RY82]	REFNigelle_001588.p1	Aqcoe1G041100.1.p	0	AT2G32560.1	F-box family protein
RN_001589	no	ni	ni	ni	ni	REFNigelle_001589.p1	Aqcoe3G037600.1.p	1e-49	AT1G68480.1	C2H2 and C2HC zinc fingers superfamily protein
RN_001590	no	REFNigelle_001590.p1	AT3G14470.2	1.95e-57	RPPL1 description:Putative disease resistance RPP13-like protein 1 [Source:Q9LRR4]	REFNigelle_001590.p1	Aqcoe2G292800.2.p	4e-113	AT3G14470.1	NB-ARC domain-containing disease resistance protein
RN_001593	no	ni	ni	ni	ni	ni	ni	ni	ni	ni
RN_001594	no	REFNigelle_001594.p1	AT5G03780.1	3.14e-13	TRFL10 description:TRF-like 10 (Fragment) [Source:C0SVN2]	REFNigelle_001594.p1	Aqcoe3G418600.10.p	8e-61	AT5G03780.1	TRF-like 10
RN_001595	no	REFNigelle_001595.p1	AT3G09510.1	2.44e-07	Putative non-LTR reverse transcriptase [Source:UniProtKB/TrEMBL;Acc:Q9SF52]	REFNigelle_001595.p1	Aqcoe3G174500.1.p	2e-11	AT3G09510.1	Ribonuclease H-like superfamily protein
RN_001596	no	REFNigelle_001596.p1	AT1G73960.1	0	TAF2 description:Transcription initiation factor TFIID subunit 2 [Source:Q8LPF0]	REFNigelle_001596.p1	Aqcoe3G395400.1.p	0	AT1G73960.1	TBP-associated factor 2
RN_001597	no	ni	ni	ni	ni	ni	ni	ni	ni	ni
RN_001604	no	ni	ni	ni	ni	ni	ni	ni	ni	ni
RN_001605	no	REFNigelle_001605.p1	AT1G47720.1	3.57e-43	OSB1 description:Protein OSB1, mitochondrial [Source:Q9SX99]	REFNigelle_001605.p1	Aqcoe6G095600.1.p	6e-108	AT1G47720.1	Primosome PriB/single-strand DNA-binding
RN_001606	no	ni	ni	ni	ni	ni	ni	ni	ni	ni
RN_001610	no	ni	ni	ni	ni	ni	ni	ni	ni	ni
RN_001611	no	ni	ni	ni	ni	ni	ni	ni	ni	ni
RN_001612	no	ni	ni	ni	ni	ni	ni	ni	ni	ni
RN_001614	no	REFNigelle_001614.p1	AT2G28880.1	0	ADCS description:Aminodeoxychorismate synthase, chloroplastic [Source:Q8LPN3]	REFNigelle_001614.p1	Aqcoe7G297500.2.p	0	AT2G28880.1	para-aminobenzoate (PABA) synthase family protein
RN_001616	no	REFNigelle_001616.p1	AT5G43700.1	4e-80	IAA4 description:Auxin-responsive protein IAA4 [Source:P33077]	REFNigelle_001616.p1	Aqcoe5G040600.1.p	5e-106	AT1G04240.1	AUX/IAA transcriptional regulator family protein
RN_001617	no	ni	ni	ni	ni	ni	ni	ni	ni	ni
RN_001619	no	REFNigelle_001619.p1	AT1G14760.2	5.48e-15	KNATM description:Protein KNATM [Source:F4HXU3]	REFNigelle_001619.p1	Aqcoe3G415300.1.p	2e-29	AT1G14760.2	KNOX Arabidopsis thaliana meinox
RN_001620	no	ni	ni	ni	ni	ni	ni	ni	ni	ni
RN_001621	no	ni	ni	ni	ni	ni	ni	ni	ni	ni
RN_001622	no	REFNigelle_001622.p1	AT2G29760.1	2.57e-132	PCMP-H33 description:Pentatricopeptide repeat-containing protein At2g29760, chloroplastic [Source:O82380]	REFNigelle_001622.p1	Aqcoe2G259600.1.p	0	AT2G29760.1	Tetratricopeptide repeat (TPR)-like superfamily protein
RN_001624	no	ni	ni	ni	ni	ni	ni	ni	ni	ni
RN_001626	no	REFNigelle_001626.p1	AT4G00310.2	4.67e-07	MEE46 description:AT4G00310 protein [Source:O23071]	REFNigelle_001626.p1	Aqcoe7G026700.1.p	4e-18	0	0
RN_001627	no	ni	ni	ni	ni	ni	ni	ni	ni	ni
RN_001628	no	REFNigelle_001628.p1	AT5G58300.2	0	Probable inactive receptor kinase At5g58300 [Source:UniProtKB/Swiss-Prot;Acc:Q9LVM0]	REFNigelle_001628.p1	Aqcoe1G499700.4.p	0	AT5G58300.2	Leucine-rich repeat protein kinase family protein
RN_001629	yes	REFNigelle_001629.p1	AT5G51970.1	0	SDH description:Sorbitol dehydrogenase [Source:Q9FJ95]	REFNigelle_001629.p1	Aqcoe5G426900.1.p	0	AT5G51970.2	GroES-like zinc-binding alcohol dehydrogenase family protein
RN_001630	no	ni	ni	ni	ni	ni	ni	ni	ni	ni
RN_001632	no	ni	ni	ni	ni	ni	ni	ni	ni	ni
RN_001633	no	ni	ni	ni	ni	ni	ni	ni	ni	ni
RN_001634	no	ni	ni	ni	ni	ni	ni	ni	ni	ni
RN_001636	no	ni	ni	ni	ni	ni	ni	ni	ni	ni
RN_001637	no	ni	ni	ni	ni	ni	ni	ni	ni	ni
RN_001638	no	REFNigelle_001638.p1	AT5G08520.1	5.1e-96	SRM1 description:Transcription factor SRM1 [Source:Q9FNN6]	REFNigelle_001638.p1	Aqcoe3G439300.2.p	1e-134	AT5G08520.1	Duplicated homeodomain-like superfamily protein
RN_001639	no	REFNigelle_001639.p1	AT3G04910.1	0	WNK1 description:Serine/threonine-protein kinase WNK1 [Source:Q9CAV6]	REFNigelle_001639.p1	Aqcoe5G055700.1.p	0	AT3G04910.1	with no lysine (K) kinase 1
RN_001640	no	REFNigelle_001640.p1	AT3G04910.2	0	WNK1 description:Serine/threonine-protein kinase WNK1 [Source:Q9CAV6]	REFNigelle_001640.p1	Aqcoe5G055700.1.p	0	AT3G04910.1	with no lysine (K) kinase 1
RN_001641	no	REFNigelle_001641.p1	AT1G05000.1	6.84e-91	Phosphotyrosine protein phosphatases superfamily protein [Source:UniProtKB/TrEMBL;Acc:F4I780]	REFNigelle_001641.p1	Aqcoe4G296800.1.p	9e-101	AT1G05000.1	Phosphotyrosine protein phosphatases superfamily protein
RN_001642	no	REFNigelle_001642.p1	AT1G64230.1	2.36e-105	UBC28 description:Ubiquitin-conjugating enzyme 28 [Source:F4I5B8]	REFNigelle_001642.p1	Aqcoe7G258200.1.p	3e-106	AT1G64230.1	ubiquitin-conjugating enzyme 28
RN_001643	no	REFNigelle_001643.p1	AT3G48820.1	0	SIA2 description:Sialyltransferase-like protein 2 [Source:Q8RY00]	REFNigelle_001643.p1	Aqcoe2G140000.5.p	0	AT3G48820.1	Glycosyltransferase family 29 (sialyltransferase) family protein
RN_001644	no	ni	ni	ni	ni	ni	ni	ni	ni	ni
RN_001645	yes	ni	ni	ni	ni	ni	ni	ni	ni	ni
RN_001646	no	REFNigelle_001646.p1	AT5G59970.2	1.74e-68	Histone H4 [Source:UniProtKB/TrEMBL;Acc:A0A178VF54]	REFNigelle_001646.p1	Aqcoe3G423600.1.p	2e-53	AT1G07820.1	Histone superfamily protein
RN_001647	no	ni	ni	ni	ni	ni	ni	ni	ni	ni
RN_001650	no	ni	ni	ni	ni	ni	ni	ni	ni	ni
RN_001651	no	ni	ni	ni	ni	ni	ni	ni	ni	ni
RN_001653	no	REFNigelle_001653.p1	AT3G14180.1	1.52e-70	ASIL2 description:ASIL2 [Source:A0A178V8Z7]	REFNigelle_001653.p1	Aqcoe7G436800.1.p	5e-77	AT3G14180.1	sequence-specific DNA binding transcription factors
RN_001654	no	ni	ni	ni	ni	ni	ni	ni	ni	ni
RN_001655	no	ni	ni	ni	ni	ni	ni	ni	ni	ni
RN_001656	yes	REFNigelle_001656.p1	AT1G06790.1	5.71e-70	F4H5.12 protein [Source:UniProtKB/TrEMBL;Acc:Q9M9Y6]	REFNigelle_001656.p1	Aqcoe1G186600.1.p	5e-95	AT1G06790.1	RNA polymerase Rpb7 N-terminal domain-containing protein
RN_001657	no	ni	ni	ni	ni	ni	ni	ni	ni	ni
RN_001659	no	ni	ni	ni	ni	ni	ni	ni	ni	ni
RN_001660	no	ni	ni	ni	ni	ni	ni	ni	ni	ni
RN_001661	no	REFNigelle_001661.p1	AT1G71460.1	0	PCMP-A3 description:Pentatricopeptide repeat-containing protein At1g71460, chloroplastic [Source:Q9C9I3]	REFNigelle_001661.p1	Aqcoe4G034900.3.p	9e-109	AT4G18750.1	Pentatricopeptide repeat (PPR) superfamily protein
RN_001662	no	REFNigelle_001662.p1	AT5G09995.2	3.6e-84	unknown protein; BEST Arabidopsis thaliana protein match is: unknown protein (TAIR:AT5G09995]	REFNigelle_001662.p1	Aqcoe6G052800.1.p	1e-109	AT5G09995.3	0
RN_001663	no	REFNigelle_001663.p1	AT5G09995.2	3.65e-44	unknown protein; BEST Arabidopsis thaliana protein match is: unknown protein (TAIR:AT5G09995]	REFNigelle_001663.p1	Aqcoe6G052800.2.p	8e-53	AT5G09995.1	0
RN_001665	no	ni	ni	ni	ni	ni	ni	ni	ni	ni
RN_001668	no	REFNigelle_001668.p1	AT4G23160.2	4.19e-15	CRK8 description:cysteine-rich RLK (RECEPTOR-like protein kinase) 8 [Source:AT4G23160]	ni	ni	ni	ni	ni
RN_001669	no	ni	ni	ni	ni	ni	ni	ni	ni	ni
RN_001670	no	ni	ni	ni	ni	ni	ni	ni	ni	ni
RN_001671	no	ni	ni	ni	ni	ni	ni	ni	ni	ni
RN_001672	no	REFNigelle_001672.p1	AT5G25190.1	7.12e-60	ERF003 description:Ethylene-responsive transcription factor ERF003 [Source:Q94AW5]	REFNigelle_001672.p1	Aqcoe7G364300.1.p	2e-43	AT5G25190.1	Integrase-type DNA-binding superfamily protein
RN_001673	no	REFNigelle_001673.p1	AT4G31160.1	7.14e-14	DCAF1 description:DDB1- and CUL4-associated factor homolog 1 [Source:Q9M086]	REFNigelle_001673.p1	Aqcoe6G014400.1.p	6e-22	AT4G31160.1	DDB1-CUL4 associated factor 1
RN_001675	no	REFNigelle_001675.p1	AT1G15080.1	2.18e-133	LPP2 description:Lipid phosphate phosphatase 2 [Source:Q9XI60]	REFNigelle_001675.p1	Aqcoe3G024000.1.p	5e-151	AT1G15080.1	lipid phosphate phosphatase 2
RN_001676	no	REFNigelle_001676.p1	AT5G55150.1	7.27e-07	Putative F-box protein At5g55150 [Source:UniProtKB/Swiss-Prot;Acc:Q9FLP7]	REFNigelle_001676.p1	Aqcoe7G406300.1.p	3e-32	AT5G55150.1	Protein of unknown function (DUF295)
RN_001677	no	REFNigelle_001677.p1	AT5G53900.3	8.23e-79	Gb [Source:UniProtKB/TrEMBL;Acc:Q9FN36]	REFNigelle_001677.p1	Aqcoe4G091300.1.p	1e-129	AT5G53900.2	Serine/threonine-protein kinase WNK (With No Lysine)-related
RN_001678	no	REFNigelle_001678.p2	AT3G15240.2	4.5e-51	Serine/threonine-protein kinase WNK (With No Lysine)-like protein [Source:UniProtKB/TrEMBL;Acc:F4IXI5]	REFNigelle_001678.p1	Aqcoe4G091300.1.p	5e-68	AT5G53900.2	Serine/threonine-protein kinase WNK (With No Lysine)-related
RN_001679	no	REFNigelle_001679.p1	AT4G30810.1	0	SCPL29 description:Serine carboxypeptidase-like 29 [Source:Q949Q7]	REFNigelle_001679.p1	Aqcoe7G220300.1.p	0	AT4G30810.1	serine carboxypeptidase-like 29
RN_001680	no	ni	ni	ni	ni	ni	ni	ni	ni	ni
RN_001681	no	ni	ni	ni	ni	ni	ni	ni	ni	ni
RN_001683	no	REFNigelle_001683.p1	AT1G19270.1	0	DA1 description:DA1 [Source:A0A178WC71]	REFNigelle_001683.p1	Aqcoe6G108000.1.p	0	AT4G36860.1	LIM domain-containing protein
RN_001684	no	ni	ni	ni	ni	ni	ni	ni	ni	ni
RN_001686	no	ni	ni	ni	ni	ni	ni	ni	ni	ni
RN_001687	yes	ni	ni	ni	ni	ni	ni	ni	ni	ni
RN_001688	no	ni	ni	ni	ni	REFNigelle_001688.p1	Aqcoe5G234900.1.p	2e-17	AT5G04410.1	NAC domain containing protein 2
RN_001691	no	ni	ni	ni	ni	ni	ni	ni	ni	ni
RN_001692	no	REFNigelle_001692.p1	ATCG00670.1	9.91e-70	CLPP1 description:plastid-encoded CLP P [Source:ATCG00670]	REFNigelle_001692.p1	Aqcoe3G240200.1.p	4e-49	ATCG00670.1	plastid-encoded CLP P
RN_001693	no	REFNigelle_001693.p1	AT1G04870.2	0	PRMT10 description:PRMT10 [Source:A0A178WKU5]	REFNigelle_001693.p1	Aqcoe7G215300.1.p	0	AT1G04870.2	protein arginine methyltransferase 10
RN_001694	no	ni	ni	ni	ni	ni	ni	ni	ni	ni
RN_001696	no	ni	ni	ni	ni	ni	ni	ni	ni	ni
RN_001698	yes	ni	ni	ni	ni	ni	ni	ni	ni	ni
RN_001699	no	ni	ni	ni	ni	ni	ni	ni	ni	ni
RN_001702	no	ni	ni	ni	ni	ni	ni	ni	ni	ni
RN_001704	no	REFNigelle_001704.p1	AT5G19370.1	4.16e-101	Rhodanese-like/PpiC domain-containing protein 12, chloroplastic [Source:UniProtKB/Swiss-Prot;Acc:Q93WI0]	REFNigelle_001704.p1	Aqcoe1G046900.2.p	2e-143	AT5G19370.1	rhodanese-like domain-containing protein / PPIC-type PPIASE domain-containing protein
RN_001705	no	REFNigelle_001705.p1	AT1G27730.1	1.59e-55	ZAT10 description:Zinc finger protein ZAT10 [Source:Q96289]	REFNigelle_001705.p1	Aqcoe5G103800.1.p	2e-58	AT1G27730.1	salt tolerance zinc finger
RN_001706	no	ni	ni	ni	ni	REFNigelle_001706.p1	Aqcoe2G144100.1.p	1e-13	0	0
RN_001708	no	ni	ni	ni	ni	REFNigelle_001708.p3	Aqcoe2G128200.1.p	3e-07	0	0
RN_001709	no	ni	ni	ni	ni	ni	ni	ni	ni	ni
RN_001710	no	ni	ni	ni	ni	ni	ni	ni	ni	ni
RN_001711	no	ni	ni	ni	ni	ni	ni	ni	ni	ni
RN_001712	no	ni	ni	ni	ni	ni	ni	ni	ni	ni
RN_001713	no	REFNigelle_001713.p1	AT1G08520.1	0	CHLD description:Mg-protoporphyrin IX chelatase [Source:A0A178W355]	REFNigelle_001713.p1	Aqcoe2G030000.1.p	0	AT1G08520.1	ALBINA 1
RN_001715	no	ni	ni	ni	ni	ni	ni	ni	ni	ni
RN_001716	no	REFNigelle_001716.p1	AT3G24490.1	3.11e-75	Alcohol dehydrogenase transcription factor Myb/SANT-like family protein [Source:UniProtKB/TrEMBL;Acc:Q9LV59]	REFNigelle_001716.p1	Aqcoe7G395000.1.p	3e-160	AT3G24490.1	Alcohol dehydrogenase transcription factor Myb/SANT-like family protein
RN_001717	no	ni	ni	ni	ni	ni	ni	ni	ni	ni
RN_001720	no	REFNigelle_001720.p1	AT3G50520.1	1.96e-106	Phosphoglycerate mutase-like protein 4 [Source:UniProtKB/Swiss-Prot;Acc:Q9SCS3]	REFNigelle_001720.p1	Aqcoe6G151500.1.p	1e-110	AT3G50520.1	Phosphoglycerate mutase family protein
RN_001724	no	REFNigelle_001724.p1	AT5G50740.2	2.18e-52	Heavy metal transport/detoxification superfamily protein [Source:UniProtKB/TrEMBL;Acc:B3H4U8]	REFNigelle_001724.p1	Aqcoe3G181000.1.p	2e-33	AT5G50740.1	Heavy metal transport/detoxification superfamily protein
RN_001727	no	REFNigelle_001727.p1	AT2G13600.1	5.4e-83	PCMP-E76 description:Pentatricopeptide repeat-containing protein At2g13600 [Source:Q9SIT7]	REFNigelle_001727.p1	Aqcoe1G042700.1.p	7e-141	AT4G39530.1	Tetratricopeptide repeat (TPR)-like superfamily protein
RN_001730	no	ni	ni	ni	ni	ni	ni	ni	ni	ni
RN_001731	no	ni	ni	ni	ni	ni	ni	ni	ni	ni
RN_001732	no	ni	ni	ni	ni	ni	ni	ni	ni	ni
RN_001734	no	REFNigelle_001734.p1	AT3G48560.1	1e-55	ALS description:Acetolactate synthase, chloroplastic [Source:P17597]	REFNigelle_001734.p1	Aqcoe5G065200.1.p	3e-64	AT3G48560.1	chlorsulfuron/imidazolinone resistant 1
RN_001735	no	REFNigelle_001735.p1	AT1G12040.1	1.83e-161	LRX1 description:Leucine-rich repeat extensin-like protein 1 [Source:O65375]	REFNigelle_001735.p1	Aqcoe7G248100.1.p	0	AT1G12040.1	leucine-rich repeat/extensin 1
RN_001737	no	ni	ni	ni	ni	ni	ni	ni	ni	ni
RN_001739	no	ni	ni	ni	ni	ni	ni	ni	ni	ni
RN_001740	no	REFNigelle_001740.p1	AT5G64260.1	4.65e-117	EXL2 description:Protein EXORDIUM-like 2 [Source:Q9FE06]	REFNigelle_001740.p1	Aqcoe6G080800.1.p	0	AT5G64260.1	EXORDIUM like 2
RN_001741	no	ni	ni	ni	ni	ni	ni	ni	ni	ni
RN_001742	no	ni	ni	ni	ni	ni	ni	ni	ni	ni
RN_001743	no	ni	ni	ni	ni	ni	ni	ni	ni	ni
RN_001746	no	REFNigelle_001746.p1	AT5G36100.1	2.69e-17	unknown protein; BEST Arabidopsis thaliana protein match is: unknown protein (TAIR:AT5G36100]	REFNigelle_001746.p1	Aqcoe2G407400.1.p	3e-45	AT1G65090.3	0
RN_001750	no	REFNigelle_001750.p1	AT2G45910.1	9.24e-164	PUB33 description:U-box domain-containing protein 33 [Source:Q8GUH1]	REFNigelle_001750.p1	Aqcoe1G462100.1.p	0	AT3G49060.2	U-box domain-containing protein kinase family protein
RN_001752	no	ni	ni	ni	ni	ni	ni	ni	ni	ni
RN_001753	no	ni	ni	ni	ni	ni	ni	ni	ni	ni
RN_001754	no	ni	ni	ni	ni	ni	ni	ni	ni	ni
RN_001755	yes	ni	ni	ni	ni	ni	ni	ni	ni	ni
RN_001758	no	ni	ni	ni	ni	ni	ni	ni	ni	ni
RN_001759	no	ni	ni	ni	ni	ni	ni	ni	ni	ni
RN_001760	no	ni	ni	ni	ni	ni	ni	ni	ni	ni
RN_001762	no	ni	ni	ni	ni	ni	ni	ni	ni	ni
RN_001764	no	ni	ni	ni	ni	ni	ni	ni	ni	ni
RN_001765	no	REFNigelle_001765.p1	AT3G14640.1	5.51e-47	CYP72A10 description:Cytochrome P450, family 72, subfamily A, polypeptide 10 [Source:A0A1I9LNT1]	REFNigelle_001765.p1	Aqcoe3G066300.1.p	1e-102	AT2G26710.1	Cytochrome P450 superfamily protein
RN_001766	no	ni	ni	ni	ni	ni	ni	ni	ni	ni
RN_001767	no	REFNigelle_001767.p1	AT3G09720.1	0	RH57 description:DEAD-box ATP-dependent RNA helicase 57 [Source:Q84TG1]	REFNigelle_001767.p1	Aqcoe2G327300.1.p	0	AT3G09720.1	P-loop containing nucleoside triphosphate hydrolases superfamily protein
RN_001768	no	REFNigelle_001768.p1	AT1G80230.1	5.46e-56	COX5B-2 description:Cytochrome c oxidase subunit 5b-2, mitochondrial [Source:Q9SSB8]	REFNigelle_001768.p1	Aqcoe7G394000.1.p	1e-70	AT3G15640.2	Rubredoxin-like superfamily protein
RN_001769	no	ni	ni	ni	ni	ni	ni	ni	ni	ni
RN_001770	no	ni	ni	ni	ni	ni	ni	ni	ni	ni
RN_001772	no	REFNigelle_001772.p1	AT5G24810.1	4e-123	ABC1 family protein [Source:UniProtKB/TrEMBL;Acc:F4KIJ2]	REFNigelle_001772.p1	Aqcoe7G289800.1.p	0	AT5G24810.2	ABC1 family protein
RN_001773	no	REFNigelle_001773.p1	AT1G11755.1	1.18e-13	LEW1 description:Undecaprenyl pyrophosphate synthetase family protein [Source:Q8H0V2]	REFNigelle_001773.p1	Aqcoe2G027500.1.p	3e-34	AT1G11755.1	Undecaprenyl pyrophosphate synthetase family protein
RN_001774	no	ni	ni	ni	ni	ni	ni	ni	ni	ni
RN_001775	no	REFNigelle_001775.p1	AT2G20710.1	3.58e-115	Pentatricopeptide repeat-containing protein At2g20710, mitochondrial [Source:UniProtKB/Swiss-Prot;Acc:Q9SKU6]	REFNigelle_001775.p1	Aqcoe1G270000.2.p	0	AT2G20710.1	Tetratricopeptide repeat (TPR)-like superfamily protein
RN_001776	yes	ni	ni	ni	ni	ni	ni	ni	ni	ni
RN_001777	no	ni	ni	ni	ni	REFNigelle_001777.p1	Aqcoe2G241300.1.p	1e-20	0	0
RN_001779	no	ni	ni	ni	ni	ni	ni	ni	ni	ni
RN_001780	no	REFNigelle_001780.p1	AT1G55860.1	0	UPL1 description:E3 ubiquitin-protein ligase UPL1 [Source:Q8GY23]	REFNigelle_001780.p1	Aqcoe5G164100.1.p	0	AT1G70320.1	ubiquitin-protein ligase 2
RN_001781	no	REFNigelle_001781.p1	AT4G35090.3	0	CAT2 description:catalase 2 [Source:AT4G35090]	REFNigelle_001781.p1	Aqcoe5G121500.1.p	0	AT4G35090.1	catalase 2
RN_001782	no	REFNigelle_001782.p1	AT3G26560.1	0	Probable pre-mRNA-splicing factor ATP-dependent RNA helicase DEAH5 [Source:UniProtKB/Swiss-Prot;Acc:Q38953]	REFNigelle_001782.p1	Aqcoe1G267800.2.p	0	AT3G26560.1	ATP-dependent RNA helicase, putative
RN_001783	no	ni	ni	ni	ni	ni	ni	ni	ni	ni
RN_001784	no	ni	ni	ni	ni	ni	ni	ni	ni	ni
RN_001785	no	REFNigelle_001785.p1	AT5G48410.3	7.55e-48	GLR1.3 description:Glutamate receptor 1.3 [Source:Q9FH75]	REFNigelle_001785.p1	Aqcoe0018s0008.3.p	2e-58	AT2G24720.1	glutamate receptor 2.2
RN_001786	no	REFNigelle_001786.p1	AT3G54630.1	5.63e-107	NDC80 description:Kinetochore protein NDC80 homolog [Source:Q9M1G5]	REFNigelle_001786.p1	Aqcoe7G353500.1.p	0	AT3G54630.1	0
RN_001787	no	ni	ni	ni	ni	ni	ni	ni	ni	ni
RN_001788	no	ni	ni	ni	ni	ni	ni	ni	ni	ni
RN_001789	no	ni	ni	ni	ni	ni	ni	ni	ni	ni
RN_001790	no	REFNigelle_001790.p1	AT5G51410.5	1.52e-151	Arginine-aspartate-rich RNA binding protein-like [Source:UniProtKB/TrEMBL;Acc:P94088]	REFNigelle_001790.p1	Aqcoe7G082300.2.p	1e-169	AT5G51410.2	LUC7 N_terminus domain-containing protein
RN_001792	no	REFNigelle_001792.p1	AT1G15660.1	6.75e-20	CENP-C description:Centromere protein C [Source:Q66LG9]	REFNigelle_001792.p1	Aqcoe7G194000.1.p	2e-106	AT1G15660.1	centromere protein C
RN_001793	no	ni	ni	ni	ni	ni	ni	ni	ni	ni
RN_001794	no	ni	ni	ni	ni	ni	ni	ni	ni	ni
RN_001795	no	REFNigelle_001795.p1	AT5G05960.1	2.83e-46	At5g05960 [Source:UniProtKB/TrEMBL;Acc:Q8LBY9]	REFNigelle_001795.p1	Aqcoe1G094100.1.p	4e-46	AT3G53980.2	Bifunctional inhibitor/lipid-transfer protein/seed storage 2S albumin superfamily protein
RN_001798	no	ni	ni	ni	ni	ni	ni	ni	ni	ni
RN_001799	no	REFNigelle_001799.p1	AT2G45250.1	1.32e-16	Integral membrane hemolysin-III-like protein [Source:UniProtKB/TrEMBL;Acc:A8MRU4]	REFNigelle_001799.p1	Aqcoe5G122000.2.p	2e-99	AT2G45250.1	Integral membrane protein hemolysin-III homolog
RN_001800	no	REFNigelle_001800.p1	AT4G24680.5	2.45e-92	MOS1 description:modifier of snc1 [Source:AT4G24680]	REFNigelle_001800.p1	Aqcoe3G151300.2.p	0	AT4G24680.1	modifier of snc1
RN_001802	no	ni	ni	ni	ni	ni	ni	ni	ni	ni
RN_001805	no	REFNigelle_001805.p1	AT1G29880.1	0	Glycine--tRNA ligase, mitochondrial 1 [Source:UniProtKB/Swiss-Prot;Acc:O23627]	REFNigelle_001805.p1	Aqcoe1G076100.2.p	0	AT1G29880.1	glycyl-tRNA synthetase / glycine--tRNA ligase
RN_001807	no	REFNigelle_001807.p1	AT1G78310.1	5.41e-34	VQ9 description:VQ motif-containing protein 9 [Source:Q9M9F0]	REFNigelle_001807.p1	Aqcoe6G078100.1.p	4e-43	AT1G78310.1	VQ motif-containing protein
RN_001808	no	ni	ni	ni	ni	ni	ni	ni	ni	ni
RN_001809	no	ni	ni	ni	ni	ni	ni	ni	ni	ni
RN_001811	no	REFNigelle_001811.p1	AT4G04370.1	1.62e-09	PCMP-E99 description:Pentatricopeptide repeat-containing protein At4g04370 [Source:Q9XE98]	REFNigelle_001811.p1	Aqcoe3G017300.1.p	1e-19	AT4G04370.1	Tetratricopeptide repeat (TPR)-like superfamily protein
RN_001813	no	ni	ni	ni	ni	ni	ni	ni	ni	ni
RN_001814	no	REFNigelle_001814.p1	AT1G22460.1	0	OFUT7 description:O-fucosyltransferase 7 [Source:B7ZWR7]	REFNigelle_001814.p1	Aqcoe6G077400.1.p	0	AT1G22460.1	O-fucosyltransferase family protein
RN_001815	no	ni	ni	ni	ni	ni	ni	ni	ni	ni
RN_001816	no	ni	ni	ni	ni	ni	ni	ni	ni	ni
RN_001818	no	ni	ni	ni	ni	ni	ni	ni	ni	ni
RN_001819	no	REFNigelle_001819.p1	AT5G04170.1	1.58e-74	CML50 description:Probable calcium-binding protein CML50 [Source:Q9FYE4]	REFNigelle_001819.p1	Aqcoe2G025600.1.p	2e-82	AT3G10300.3	Calcium-binding EF-hand family protein
RN_001822	yes	ni	ni	ni	ni	ni	ni	ni	ni	ni
RN_001823	no	ni	ni	ni	ni	ni	ni	ni	ni	ni
RN_001827	no	REFNigelle_001827.p1	AT1G22310.2	1.5e-55	MBD8 description:Methyl-CpG-binding domain-containing protein 8 [Source:Q9LME6]	REFNigelle_001827.p1	Aqcoe6G082600.1.p	0	AT1G22310.2	methyl-CPG-binding domain 8
RN_001828	no	ni	ni	ni	ni	ni	ni	ni	ni	ni
RN_001829	no	REFNigelle_001829.p1	AT5G14090.2	4.38e-25	LA1 description:Protein LAZY 1 [Source:Q5XV40]	REFNigelle_001829.p1	Aqcoe5G350200.1.p	2e-76	AT5G14090.1	0
RN_001832	no	REFNigelle_001832.p1	AT2G22540.3	5.45e-12	SVP description:At2g22540 [Source:A7XFU1]	REFNigelle_001832.p1	Aqcoe5G160100.3.p	2e-11	AT2G22540.1	K-box region and MADS-box transcription factor family protein
RN_001833	no	REFNigelle_001833.p1	AT3G29635.1	2.84e-83	Anthocyanin acyltransferase-like protein [Source:UniProtKB/TrEMBL;Acc:Q9LJA2]	REFNigelle_001833.p1	Aqcoe1G305200.1.p	1e-161	AT1G03495.1	HXXXD-type acyl-transferase family protein
RN_001834	no	ni	ni	ni	ni	ni	ni	ni	ni	ni
RN_001835	no	REFNigelle_001835.p1	AT1G78895.1	7.29e-67	RTNLB22 description:Reticulon-like protein B22 [Source:Q8GWH5]	REFNigelle_001835.p1	Aqcoe7G288300.1.p	2e-88	AT1G78895.1	Reticulon family protein
RN_001838	no	ni	ni	ni	ni	ni	ni	ni	ni	ni
RN_001839	no	ni	ni	ni	ni	ni	ni	ni	ni	ni
RN_001840	no	REFNigelle_001840.p1	AT3G54900.1	2.9e-63	GRXS14 description:Monothiol glutaredoxin-S14, chloroplastic [Source:Q84Y95]	REFNigelle_001840.p1	Aqcoe5G309600.1.p	2e-74	AT3G54900.1	CAX interacting protein 1
RN_001843	yes	REFNigelle_001843.p1	AT4G12510.1	8.28e-15	At4g12520 [Source:UniProtKB/TrEMBL;Acc:Q9S7U3]	REFNigelle_001843.p1	Aqcoe5G252200.1.p	9e-18	AT2G45180.1	Bifunctional inhibitor/lipid-transfer protein/seed storage 2S albumin superfamily protein
RN_001844	yes	REFNigelle_001844.p1	AT5G18380.1	6.01e-94	RPS16C description:40S ribosomal protein S16-3 [Source:Q42340]	REFNigelle_001844.p1	Aqcoe6G136600.1.p	4e-99	AT2G09990.1	Ribosomal protein S5 domain 2-like superfamily protein
RN_001845	no	REFNigelle_001845.p1	AT3G47910.2	1.97e-33	Ubiquitin carboxyl-terminal hydrolase-related protein [Source:UniProtKB/TrEMBL;Acc:F4JCR3]	REFNigelle_001845.p1	Aqcoe6G177400.2.p	2e-29	AT3G47890.1	Ubiquitin carboxyl-terminal hydrolase-related protein
RN_001847	no	REFNigelle_001847.p1	AT5G41650.1	8.91e-70	Gb [Source:UniProtKB/TrEMBL;Acc:Q9FFR5]	REFNigelle_001847.p1	Aqcoe6G190900.3.p	4e-74	AT5G41650.1	Lactoylglutathione lyase / glyoxalase I family protein
RN_001848	no	REFNigelle_001848.p1	AT1G01770.1	0	Propionyl-CoA carboxylase [Source:UniProtKB/TrEMBL;Acc:Q8GZ85]	REFNigelle_001848.p1	Aqcoe5G362500.5.p	0	AT1G01770.1	0
RN_001850	no	ni	ni	ni	ni	ni	ni	ni	ni	ni
RN_001851	no	REFNigelle_001851.p1	AT2G46170.1	8.62e-87	RTNLB5 description:Reticulon-like protein B5 [Source:O82352]	REFNigelle_001851.p1	Aqcoe2G074300.1.p	3e-91	AT4G23630.1	VIRB2-interacting protein 1
RN_001852	no	REFNigelle_001852.p1	AT5G40660.1	6.55e-143	AT5g40660/MNF13_180 [Source:UniProtKB/TrEMBL;Acc:Q94BY8]	REFNigelle_001852.p1	Aqcoe1G222600.1.p	3e-177	AT5G40660.1	ATP12 protein-related
RN_001854	no	REFNigelle_001854.p1	AT3G05850.1	0	MUG7 [Source:UniProtKB/TrEMBL;Acc:A0A178VB69]	REFNigelle_001854.p1	Aqcoe1G325700.1.p	3e-08	0	0
RN_001855	no	ni	ni	ni	ni	ni	ni	ni	ni	ni
RN_001856	yes	REFNigelle_001856.p1	AT1G06780.1	0	GAUT6 description:Hexosyltransferase [Source:F4IDS0]	REFNigelle_001856.p1	Aqcoe5G039700.1.p	0	AT1G06780.1	galacturonosyltransferase 6
RN_001857	no	REFNigelle_001857.p1	AT2G27510.1	2.41e-49	FD3 description:Ferredoxin [Source:A0A178VWS0]	REFNigelle_001857.p1	Aqcoe2G106100.1.p	2e-69	AT2G27510.1	ferredoxin 3
RN_001858	no	REFNigelle_001858.p1	AT1G07210.1	1.05e-30	F10K1.8 protein [Source:UniProtKB/TrEMBL;Acc:Q9LML3]	REFNigelle_001858.p1	Aqcoe1G419200.1.p	2e-37	AT1G07210.1	Ribosomal protein S18
RN_001859	no	ni	ni	ni	ni	REFNigelle_001859.p1	Aqcoe5G287900.1.p	2e-23	0	0
RN_001860	no	ni	ni	ni	ni	REFNigelle_001860.p1	Aqcoe5G287900.1.p	1e-29	0	0
RN_001862	no	REFNigelle_001862.p1	AT1G48050.1	0	KU80 description:ATP-dependent DNA helicase 2 subunit KU80 [Source:Q9FQ09]	REFNigelle_001862.p1	Aqcoe5G047900.1.p	0	AT1G48050.1	Ku80 family protein
RN_001863	no	REFNigelle_001863.p1	AT2G04520.1	3.16e-90	Nucleic acid-binding, OB-fold-like protein [Source:UniProtKB/TrEMBL;Acc:Q9SJB9]	REFNigelle_001863.p1	Aqcoe5G442400.1.p	7e-69	AT2G04520.1	Nucleic acid-binding, OB-fold-like protein
RN_001865	no	REFNigelle_001865.p1	AT4G28950.1	1.34e-130	ARAC7 description:Rac-like GTP-binding protein ARAC7 [Source:O82480]	REFNigelle_001865.p1	Aqcoe1G047900.1.p	1e-135	AT4G28950.1	RHO-related protein from plants 9
RN_001866	no	ni	ni	ni	ni	ni	ni	ni	ni	ni
RN_001868	no	REFNigelle_001868.p1	AT5G08100.1	8.19e-179	Isoaspartyl peptidase/L-asparaginase 1 [Source:UniProtKB/Swiss-Prot;Acc:P50287]	REFNigelle_001868.p1	Aqcoe3G376600.1.p	0	AT5G08100.1	N-terminal nucleophile aminohydrolases (Ntn hydrolases) superfamily protein
RN_001869	no	REFNigelle_001869.p1	AT3G05090.2	0	LRS1 description:AT3g05090/T12H1_5 [Source:Q93ZS6]	REFNigelle_001869.p1	Aqcoe2G310600.1.p	0	AT3G05090.2	Transducin/WD40 repeat-like superfamily protein
RN_001870	no	REFNigelle_001870.p1	AT5G52820.1	0	NLE1 description:NLE [Source:A0A178UNZ3]	REFNigelle_001870.p1	Aqcoe2G017100.1.p	0	AT5G52820.1	WD-40 repeat family protein / notchless protein, putative
RN_001871	no	ni	ni	ni	ni	ni	ni	ni	ni	ni
RN_001872	no	ni	ni	ni	ni	ni	ni	ni	ni	ni
RN_001877	no	ni	ni	ni	ni	ni	ni	ni	ni	ni
RN_001878	no	ni	ni	ni	ni	ni	ni	ni	ni	ni
RN_001879	no	ni	ni	ni	ni	ni	ni	ni	ni	ni
RN_001880	no	REFNigelle_001880.p1	AT5G23390.1	0	AT5g23390/T32G24_2 [Source:UniProtKB/TrEMBL;Acc:Q8RX89]	REFNigelle_001880.p1	Aqcoe3G010400.8.p	0	AT5G23390.1	Plant protein of unknown function (DUF639)
RN_001881	no	ni	ni	ni	ni	REFNigelle_001881.p1	Aqcoe4G222200.1.p	7e-08	0	0
RN_001882	no	REFNigelle_001882.p1	AT4G00060.4	0	MEE44 description:Nucleotidyltransferase family protein [Source:F4JH01]	REFNigelle_001882.p1	Aqcoe7G082200.1.p	0	AT4G00060.1	Nucleotidyltransferase family protein
RN_001884	no	ni	ni	ni	ni	ni	ni	ni	ni	ni
RN_001885	no	REFNigelle_001885.p1	AT2G03430.1	1.23e-14	Ankyrin repeat family protein [Source:UniProtKB/TrEMBL;Acc:Q8GZ22]	REFNigelle_001885.p1	Aqcoe2G362800.2.p	4e-19	AT3G04710.2	ankyrin repeat family protein
RN_001886	no	ni	ni	ni	ni	REFNigelle_001886.p1	Aqcoe7G153100.1.p	6e-10	AT1G21280.1	0
RN_001887	yes	ni	ni	ni	ni	ni	ni	ni	ni	ni
RN_001888	no	REFNigelle_001888.p1	AT5G12010.1	1.04e-129	AT5g12010/F14F18_180 [Source:UniProtKB/TrEMBL;Acc:Q9LYH2]	ni	ni	ni	ni	ni
RN_001889	no	REFNigelle_001889.p1	AT2G26800.4	0	HMGCL description:Hydroxymethylglutaryl-CoA lyase, mitochondrial [Source:O81027]	REFNigelle_001889.p1	Aqcoe1G048500.1.p	0	AT2G26800.1	Aldolase superfamily protein
RN_001890	no	ni	ni	ni	ni	REFNigelle_001890.p1	Aqcoe3G411100.1.p	0.0002	AT5G56280.1	COP9 signalosome subunit 6A
RN_001891	no	ni	ni	ni	ni	ni	ni	ni	ni	ni
RN_001892	no	REFNigelle_001892.p1	AT1G24360.1	3.76e-82	3-oxoacyl-[acyl-carrier-protein] reductase, chloroplastic [Source:UniProtKB/Swiss-Prot;Acc:P33207]	REFNigelle_001892.p1	Aqcoe5G372800.1.p	2e-81	AT1G24360.1	NAD(P)-binding Rossmann-fold superfamily protein
RN_001893	no	ni	ni	ni	ni	ni	ni	ni	ni	ni
RN_001894	no	ni	ni	ni	ni	ni	ni	ni	ni	ni
RN_001895	no	REFNigelle_001895.p1	AT4G31570.4	0	CONTAINS InterPro DOMAIN/s: Prefoldin (InterPro:AT4G31570]	REFNigelle_001895.p1	Aqcoe7G302500.2.p	0	AT4G31570.1	0
RN_001897	no	ni	ni	ni	ni	ni	ni	ni	ni	ni
RN_001898	no	REFNigelle_001898.p1	AT3G42170.2	1.5e-36	HAT description:DAYSLEEPER [Source:A0A178VJS5]	REFNigelle_001898.p1	Aqcoe3G393700.1.p	1e-07	AT1G18560.1	BED zinc finger ;hAT family dimerisation domain
RN_001899	no	ni	ni	ni	ni	ni	ni	ni	ni	ni
RN_001901	no	REFNigelle_001901.p1	AT5G39840.1	0	DExH-box ATP-dependent RNA helicase DExH18, mitochondrial [Source:UniProtKB/Swiss-Prot;Acc:F4KFV7]	REFNigelle_001901.p1	Aqcoe3G079900.1.p	0	AT5G39840.1	ATP-dependent RNA helicase, mitochondrial, putative
RN_001903	no	REFNigelle_001903.p1	AT5G05570.1	0	Transducin family protein / WD-40 repeat family protein [Source:UniProtKB/TrEMBL;Acc:Q9FFF8]	REFNigelle_001903.p1	Aqcoe1G417500.1.p	0	AT5G05570.2	transducin family protein / WD-40 repeat family protein
RN_001904	no	REFNigelle_001904.p1	AT5G05570.2	2.19e-134	Transducin family protein / WD-40 repeat family protein [Source:UniProtKB/TrEMBL;Acc:Q9FFF8]	REFNigelle_001904.p2	Aqcoe1G417500.1.p	0	AT5G05570.2	transducin family protein / WD-40 repeat family protein
RN_001906	no	REFNigelle_001906.p1	AT3G02380.1	1.53e-57	COL2 description:Zinc finger protein CONSTANS-LIKE 2 [Source:Q96502]	REFNigelle_001906.p1	Aqcoe3G384500.2.p	3e-81	AT3G02380.1	CONSTANS-like 2
RN_001910	no	REFNigelle_001910.p1	AT4G15550.1	1.23e-111	UGT75D1 description:UDP-glycosyltransferase 75D1 [Source:O23406]	REFNigelle_001910.p1	Aqcoe2G403200.1.p	7e-158	AT4G15550.1	indole-3-acetate beta-D-glucosyltransferase
RN_001911	no	ni	ni	ni	ni	ni	ni	ni	ni	ni
RN_001912	no	REFNigelle_001912.p1	AT5G24170.1	8.53e-63	Vesicle transport protein [Source:UniProtKB/TrEMBL;Acc:Q6GKX4]	REFNigelle_001912.p1	Aqcoe7G011000.1.p	5e-87	AT5G24170.1	Got1/Sft2-like vescicle transport protein family
RN_001914	no	REFNigelle_001914.p1	AT3G02130.2	0	RPK2 description:LRR receptor-like serine/threonine-protein kinase RPK2 [Source:Q9S7I6]	REFNigelle_001914.p1	Aqcoe5G331200.1.p	0	AT3G02130.1	receptor-like protein kinase 2
RN_001915	yes	REFNigelle_001915.p1	AT3G02130.2	0	RPK2 description:LRR receptor-like serine/threonine-protein kinase RPK2 [Source:Q9S7I6]	REFNigelle_001915.p1	Aqcoe5G331200.1.p	0	AT3G02130.1	receptor-like protein kinase 2
RN_001918	no	REFNigelle_001918.p1	AT5G63380.1	0	4CLL9 description:4-coumarate--CoA ligase-like 9 [Source:Q84P23]	REFNigelle_001918.p1	Aqcoe5G371200.1.p	0	AT5G63380.1	AMP-dependent synthetase and ligase family protein
RN_001919	no	ni	ni	ni	ni	ni	ni	ni	ni	ni
RN_001920	no	REFNigelle_001920.p1	AT5G54520.1	8.07e-177	Transducin/WD40 repeat-like superfamily protein [Source:UniProtKB/TrEMBL;Acc:F4K0D3]	REFNigelle_001920.p1	Aqcoe4G269700.2.p	3e-164	AT5G54520.1	Transducin/WD40 repeat-like superfamily protein
RN_001921	no	REFNigelle_001921.p1	AT4G36760.2	0	ATAPP1 description:aminopeptidase P1 [Source:AT4G36760]	REFNigelle_001921.p1	Aqcoe5G198400.1.p	0	AT4G36760.1	aminopeptidase P1
RN_001922	no	REFNigelle_001922.p1	AT5G02560.1	1.27e-74	HTA12 description:Histone H2A [Source:F4KCF4]	REFNigelle_001922.p1	Aqcoe1G470800.1.p	5e-47	AT5G02560.1	histone H2A 12
RN_001923	no	ni	ni	ni	ni	ni	ni	ni	ni	ni
RN_001924	yes	ni	ni	ni	ni	ni	ni	ni	ni	ni
RN_001926	no	REFNigelle_001926.p1	AT1G32340.1	3.96e-175	NHL8 description:RBR-type E3 ubiquitin transferase [Source:Q9LQM5]	REFNigelle_001926.p1	Aqcoe3G165400.1.p	0	AT1G32340.1	NDR1/HIN1-like 8
RN_001927	no	REFNigelle_001927.p1	AT1G32340.1	0	NHL8 description:RBR-type E3 ubiquitin transferase [Source:Q9LQM5]	REFNigelle_001927.p1	Aqcoe3G165400.1.p	0	AT1G32340.1	NDR1/HIN1-like 8
RN_001929	no	ni	ni	ni	ni	ni	ni	ni	ni	ni
RN_001930	no	ni	ni	ni	ni	ni	ni	ni	ni	ni
RN_001931	no	ni	ni	ni	ni	ni	ni	ni	ni	ni
RN_001932	no	ni	ni	ni	ni	ni	ni	ni	ni	ni
RN_001934	no	REFNigelle_001934.p1	AT1G47710.1	8.3e-100	Serine protease inhibitor (SERPIN) family protein [Source:TAIR;Acc:AT1G47710]	REFNigelle_001934.p1	Aqcoe3G061700.1.p	4e-140	AT1G47710.1	Serine protease inhibitor (SERPIN) family protein
RN_001935	no	REFNigelle_001935.p1	AT1G54050.1	8.08e-42	HSP17.4B description:17.4 kDa class III heat shock protein [Source:Q9SYG1]	REFNigelle_001935.p1	Aqcoe7G438400.1.p	2e-64	AT1G54050.1	HSP20-like chaperones superfamily protein
RN_001936	no	ni	ni	ni	ni	REFNigelle_001936.p1	Aqcoe1G403500.1.p	4e-06	0	0
RN_001937	yes	ni	ni	ni	ni	ni	ni	ni	ni	ni
RN_001938	no	REFNigelle_001938.p1	AT4G19050.1	6.32e-20	NB-ARC domain containing disease resistance protein [Source:UniProtKB/TrEMBL;Acc:A0A221J431]	REFNigelle_001938.p1	Aqcoe2G065500.1.p	1e-137	AT4G19050.1	NB-ARC domain-containing disease resistance protein
RN_001939	no	REFNigelle_001939.p1	AT3G28760.2	0	3-dehydroquinate synthase [Source:UniProtKB/TrEMBL;Acc:B9DHA5]	REFNigelle_001939.p1	Aqcoe3G331800.1.p	0	AT3G28760.2	0
RN_001941	no	REFNigelle_001941.p1	AT4G24580.1	0	REN1 description:Rho GTPase-activating protein REN1 [Source:F4JQZ3]	REFNigelle_001941.p1	Aqcoe7G258000.2.p	0	AT4G24580.1	Rho GTPase activation protein (RhoGAP) with PH domain
RN_001942	no	ni	ni	ni	ni	ni	ni	ni	ni	ni
RN_001943	no	ni	ni	ni	ni	REFNigelle_001943.p1	Aqcoe2G128200.1.p	2e-18	0	0
RN_001947	no	REFNigelle_001947.p1	AT1G61010.4	0	CPSF73-I description:Cleavage and polyadenylation specificity factor subunit 3-I [Source:Q9C952]	REFNigelle_001947.p1	Aqcoe7G122700.1.p	0	AT1G61010.3	cleavage and polyadenylation specificity factor 73-I
RN_001948	no	REFNigelle_001948.p1	AT1G54730.2	1.08e-178	Sugar transporter ERD6-like 5 [Source:UniProtKB/Swiss-Prot;Acc:Q3ECP7]	REFNigelle_001948.p1	Aqcoe2G321300.1.p	0	AT1G54730.2	Major facilitator superfamily protein
RN_001949	no	REFNigelle_001949.p2	AT3G04460.1	1.21e-83	PEX12 description:Peroxin-12 [Source:A0A1I9LLU9]	REFNigelle_001949.p2	Aqcoe5G018600.3.p	1e-87	AT3G04460.1	peroxin-12
RN_001950	no	REFNigelle_001950.p1	AT5G07900.1	9.16e-05	Mitochondrial transcription termination factor family protein [Source:UniProtKB/TrEMBL;Acc:Q9SD94]	REFNigelle_001950.p1	Aqcoe2G101300.1.p	3e-14	AT5G07900.1	Mitochondrial transcription termination factor family protein
RN_001953	no	REFNigelle_001953.p1	AT1G07250.1	2.55e-106	UGT71C4 description:UDP-glycosyltransferase 71C4 [Source:Q9LML6]	REFNigelle_001953.p1	Aqcoe4G273300.1.p	1e-150	AT4G15280.1	UDP-glucosyl transferase 71B5
RN_001954	no	REFNigelle_001954.p1	AT5G05960.1	3.41e-46	At5g05960 [Source:UniProtKB/TrEMBL;Acc:Q8LBY9]	REFNigelle_001954.p1	Aqcoe1G094100.1.p	4e-56	AT3G53980.2	Bifunctional inhibitor/lipid-transfer protein/seed storage 2S albumin superfamily protein
RN_001955	no	ni	ni	ni	ni	ni	ni	ni	ni	ni
RN_001956	no	REFNigelle_001956.p1	AT5G35520.1	1.06e-42	MIS12 description:MIS12 [Source:A0A178UCY0]	REFNigelle_001956.p1	Aqcoe3G077400.1.p	2e-71	AT5G35520.1	minichromosome instability 12 (mis12)-like
RN_001957	no	REFNigelle_001957.p1	AT3G02380.1	1.61e-64	COL2 description:Zinc finger protein CONSTANS-LIKE 2 [Source:Q96502]	REFNigelle_001957.p1	Aqcoe3G384500.2.p	1e-89	AT3G02380.1	CONSTANS-like 2
RN_001958	no	ni	ni	ni	ni	ni	ni	ni	ni	ni
RN_001962	no	REFNigelle_001962.p1	AT4G37920.1	0	Uncharacterized protein At4g37920 [Source:UniProtKB/Swiss-Prot;Acc:Q84WN0]	REFNigelle_001962.p1	Aqcoe6G068400.1.p	0	AT4G37920.1	0
RN_001963	no	ni	ni	ni	ni	ni	ni	ni	ni	ni
RN_001969	yes	ni	ni	ni	ni	ni	ni	ni	ni	ni
RN_001971	no	ni	ni	ni	ni	ni	ni	ni	ni	ni
RN_001972	no	ni	ni	ni	ni	ni	ni	ni	ni	ni
RN_001977	no	ni	ni	ni	ni	ni	ni	ni	ni	ni
RN_001978	no	REFNigelle_001978.p1	AT4G04650.1	1.82e-06	AT4g04650 protein [Source:UniProtKB/TrEMBL;Acc:Q9S9V5]	REFNigelle_001978.p1	Aqcoe6G308000.1.p	1e-08	AT4G04650.1	RNA-directed DNA polymerase (reverse transcriptase)-related family protein
RN_001979	no	ni	ni	ni	ni	REFNigelle_001979.p2	Aqcoe2G128200.1.p	3e-25	0	0
RN_001980	no	ni	ni	ni	ni	ni	ni	ni	ni	ni
RN_001981	no	ni	ni	ni	ni	ni	ni	ni	ni	ni
RN_001982	no	ni	ni	ni	ni	ni	ni	ni	ni	ni
RN_001983	no	REFNigelle_001983.p1	AT5G13120.2	7.32e-111	PNSL5 description:Peptidyl-prolyl cis-trans isomerase [Source:A0A178UN74]	REFNigelle_001983.p1	Aqcoe3G164000.1.p	4e-108	AT5G13120.1	cyclophilin 20-2
RN_001984	no	ni	ni	ni	ni	ni	ni	ni	ni	ni
RN_001985	no	ni	ni	ni	ni	REFNigelle_001985.p1	Aqcoe7G365400.1.p	5e-06	0	0
RN_001986	no	ni	ni	ni	ni	ni	ni	ni	ni	ni
RN_001987	no	REFNigelle_001987.p1	AT1G33110.1	0	DTX21 description:Protein DETOXIFICATION [Source:A0A178WPH4]	REFNigelle_001987.p1	Aqcoe1G002700.3.p	0	AT1G33110.1	MATE efflux family protein
RN_001988	no	ni	ni	ni	ni	ni	ni	ni	ni	ni
RN_001991	no	REFNigelle_001991.p1	AT5G60590.2	1.16e-108	DHBP synthase RibB-like alpha/beta domain-containing protein [Source:UniProtKB/TrEMBL;Acc:F4K0E6]	REFNigelle_001991.p1	Aqcoe3G328300.2.p	9e-136	AT5G60590.2	DHBP synthase RibB-like alpha/beta domain
RN_001994	no	ni	ni	ni	ni	ni	ni	ni	ni	ni
RN_001996	no	ni	ni	ni	ni	ni	ni	ni	ni	ni
RN_001997	no	REFNigelle_001997.p1	ATMG00710.1	3.73e-06	ORF120 description:Uncharacterized mitochondrial protein AtMg00710 [Source:P92512]	ni	ni	ni	ni	ni
RN_001998	yes	ni	ni	ni	ni	ni	ni	ni	ni	ni
RN_001999	no	REFNigelle_001999.p1	ATMG00710.1	1.17e-07	ORF120 description:Uncharacterized mitochondrial protein AtMg00710 [Source:P92512]	ni	ni	ni	ni	ni
RN_002000	no	REFNigelle_002000.p1	AT4G30935.1	4.41e-82	WRKY32 description:Probable WRKY transcription factor 32 [Source:P59583]	REFNigelle_002000.p1	Aqcoe7G358700.1.p	1e-162	AT4G30935.1	WRKY DNA-binding protein 32
RN_002001	yes	REFNigelle_002001.p1	AT3G61790.1	2.32e-169	SINAT3 description:E3 ubiquitin-protein ligase [Source:A0A178V9V8]	REFNigelle_002001.p1	Aqcoe2G036800.1.p	0	AT3G61790.1	Protein with RING/U-box and TRAF-like domains
RN_002002	no	REFNigelle_002002.p1	AT3G15351.5	1.32e-74	At3g15351 [Source:UniProtKB/TrEMBL;Acc:Q9LJR1]	REFNigelle_002002.p1	Aqcoe7G299600.2.p	7e-105	AT3G15351.1	0
RN_002004	no	REFNigelle_002004.p2	ATCG01280.1	1.29e-13	ycf2-A description:Protein Ycf2 [Source:A0A1B1W513]	REFNigelle_002004.p1	Aqcoe3G174500.1.p	2e-23	AT3G09510.1	Ribonuclease H-like superfamily protein
RN_002005	no	REFNigelle_002005.p1	AT3G01930.2	0	F1C9.29 protein [Source:UniProtKB/TrEMBL;Acc:Q9S7R2]	REFNigelle_002005.p1	Aqcoe5G353900.1.p	0	AT3G01930.2	Major facilitator superfamily protein
RN_002006	yes	ni	ni	ni	ni	REFNigelle_002006.p1	Aqcoe2G128200.1.p	2e-24	0	0
RN_002007	no	REFNigelle_002007.p1	AT2G20310.1	2.05e-25	RIN13 description:At2g20310 [Source:Q9SK71]	REFNigelle_002007.p1	Aqcoe5G011400.1.p	7e-38	AT2G20310.1	RPM1 interacting protein 13
RN_002008	no	ni	ni	ni	ni	ni	ni	ni	ni	ni
RN_002009	no	REFNigelle_002009.p1	AT3G54700.1	0	PHT1-7 description:Probable inorganic phosphate transporter 1-7 [Source:Q494P0]	REFNigelle_002009.p1	Aqcoe5G026500.2.p	0	AT3G54700.1	phosphate transporter 1;7
RN_002010	no	ni	ni	ni	ni	ni	ni	ni	ni	ni
RN_002011	no	REFNigelle_002011.p1	AT1G24290.1	0	AAA-type ATPase family protein [Source:UniProtKB/TrEMBL;Acc:O48696]	REFNigelle_002011.p1	Aqcoe7G373000.1.p	0	AT1G24290.1	AAA-type ATPase family protein
RN_002012	no	REFNigelle_002012.p1	AT1G48460.1	2.91e-112	At1g48460 [Source:UniProtKB/TrEMBL;Acc:Q5PNY9]	REFNigelle_002012.p1	Aqcoe6G103800.1.p	3e-149	AT1G48460.1	0
RN_002013	no	ni	ni	ni	ni	ni	ni	ni	ni	ni
RN_002014	no	REFNigelle_002014.p1	AT4G27220.1	9.19e-73	NB-ARC domain-containing disease resistance protein [Source:TAIR;Acc:AT4G27220]	REFNigelle_002014.p1	Aqcoe7G263800.1.p	3e-108	AT4G27220.1	NB-ARC domain-containing disease resistance protein
RN_002018	no	ni	ni	ni	ni	ni	ni	ni	ni	ni
RN_002019	no	REFNigelle_002019.p1	AT5G63080.1	7.13e-77	2-oxoglutarate (2OG) and Fe(II)-dependent oxygenase superfamily protein [Source:UniProtKB/TrEMBL;Acc:Q67ZB6]	REFNigelle_002019.p1	Aqcoe3G277100.1.p	7e-106	AT5G63080.1	2-oxoglutarate (2OG) and Fe(II)-dependent oxygenase superfamily protein
RN_002020	no	ni	ni	ni	ni	ni	ni	ni	ni	ni
RN_002021	no	ni	ni	ni	ni	ni	ni	ni	ni	ni
RN_002022	no	REFNigelle_002022.p1	AT5G05010.1	7e-158	Coatomer subunit delta [Source:UniProtKB/TrEMBL;Acc:B9DGK9]	REFNigelle_002022.p1	Aqcoe3G285900.2.p	0	AT5G05010.2	clathrin adaptor complexes medium subunit family protein
RN_002023	no	REFNigelle_002023.p1	AT5G05010.1	0	Coatomer subunit delta [Source:UniProtKB/TrEMBL;Acc:B9DGK9]	REFNigelle_002023.p1	Aqcoe3G285900.2.p	0	AT5G05010.2	clathrin adaptor complexes medium subunit family protein
RN_002024	no	REFNigelle_002024.p1	AT1G78850.1	1.67e-107	EP1-like glycoprotein 3 [Source:UniProtKB/Swiss-Prot;Acc:Q9ZVA4]	REFNigelle_002024.p1	Aqcoe1G225700.1.p	3e-171	AT1G78830.1	Curculin-like (mannose-binding) lectin family protein
RN_002025	no	ni	ni	ni	ni	ni	ni	ni	ni	ni
RN_002026	no	ni	ni	ni	ni	ni	ni	ni	ni	ni
RN_002027	no	ni	ni	ni	ni	ni	ni	ni	ni	ni
RN_002028	no	ni	ni	ni	ni	ni	ni	ni	ni	ni
RN_002029	no	REFNigelle_002029.p1	AT3G20330.1	4.1e-176	PYRB description:Aspartate carbamoyltransferase, chloroplastic [Source:P49077]	REFNigelle_002029.p1	Aqcoe2G106500.1.p	0	AT3G20330.1	PYRIMIDINE B
RN_002031	no	ni	ni	ni	ni	ni	ni	ni	ni	ni
RN_002032	no	REFNigelle_002032.p1	AT3G54110.1	4.79e-158	PUMP1 description:UCP1 [Source:A0A178V8U1]	REFNigelle_002032.p1	Aqcoe4G080800.1.p	6e-168	AT3G54110.1	plant uncoupling mitochondrial protein 1
RN_002033	no	ni	ni	ni	ni	ni	ni	ni	ni	ni
RN_002034	no	ni	ni	ni	ni	ni	ni	ni	ni	ni
RN_002035	no	ni	ni	ni	ni	ni	ni	ni	ni	ni
RN_002036	no	ni	ni	ni	ni	ni	ni	ni	ni	ni
RN_002037	no	REFNigelle_002037.p1	AT3G24255.4	1.35e-25	RNA-directed DNA polymerase (Reverse transcriptase)-related family protein [Source:UniProtKB/TrEMBL;Acc:A0A1I9LSY4]	REFNigelle_002037.p1	Aqcoe7G048600.1.p	2e-21	ATMG00310.1	RNA-directed DNA polymerase (reverse transcriptase)-related family protein
RN_002038	no	REFNigelle_002038.p1	AT5G41480.1	5.98e-71	DHFS description:Dihydrofolate synthetase [Source:F4JYE9]	REFNigelle_002038.p1	Aqcoe7G015700.2.p	5e-92	AT5G41480.1	Folylpolyglutamate synthetase family protein
RN_002041	no	REFNigelle_002041.p1	AT3G24160.1	4.19e-96	PMP description:PMP [Source:A0A178VAP7]	REFNigelle_002041.p1	Aqcoe5G006700.1.p	6e-153	AT3G24160.1	putative type 1 membrane protein
RN_002042	no	REFNigelle_002042.p1	AT5G51440.1	3.29e-15	HSP23.5 description:23.5 kDa heat shock protein, mitochondrial [Source:Q9FGM9]	REFNigelle_002042.p1	Aqcoe5G417000.1.p	4e-11	AT4G25200.1	mitochondrion-localized small heat shock protein 23.6
RN_002043	no	REFNigelle_002043.p1	AT1G20770.1	9.6e-46	At1g20770 [Source:UniProtKB/TrEMBL;Acc:Q9LM77]	REFNigelle_002043.p1	Aqcoe5G118200.2.p	1e-81	AT1G20770.1	0
RN_002045	no	REFNigelle_002045.p1	AT3G21690.1	0	DTX40 description:Protein DETOXIFICATION 40 [Source:Q9LVD9]	REFNigelle_002045.p1	Aqcoe1G238700.1.p	0	AT3G21690.1	MATE efflux family protein
RN_002046	no	ni	ni	ni	ni	ni	ni	ni	ni	ni
RN_002047	no	ni	ni	ni	ni	ni	ni	ni	ni	ni
RN_002048	no	ni	ni	ni	ni	ni	ni	ni	ni	ni
RN_002050	no	REFNigelle_002050.p1	AT3G23740.1	3.03e-32	unknown protein; FUNCTIONS IN: molecular_function unknown; INVOLVED IN:AT3G23740]	REFNigelle_002050.p1	Aqcoe2G402600.1.p	2e-154	AT3G23740.1	0
RN_002052	no	REFNigelle_002052.p1	AT1G58170.1	3e-74	DIR19 description:Dirigent protein 19 [Source:Q9C523]	REFNigelle_002052.p1	Aqcoe1G007000.1.p	9e-95	AT1G55210.2	Disease resistance-responsive (dirigent-like protein) family protein
RN_002053	no	ni	ni	ni	ni	ni	ni	ni	ni	ni
RN_002054	no	ni	ni	ni	ni	ni	ni	ni	ni	ni
RN_002055	no	REFNigelle_002055.p1	AT2G25010.1	7.73e-05	MAIL1 description:Protein MAIN-LIKE 1 [Source:Q9SK32]	ni	ni	ni	ni	ni
RN_002056	no	REFNigelle_002056.p1	AT5G17540.1	3.3e-122	At5g17540 [Source:UniProtKB/TrEMBL;Acc:Q9LF70]	REFNigelle_002056.p1	Aqcoe4G270300.1.p	0	AT5G17540.1	HXXXD-type acyl-transferase family protein
RN_002058	no	ni	ni	ni	ni	ni	ni	ni	ni	ni
RN_002059	no	REFNigelle_002059.p1	AT3G17450.1	7.72e-22	HAT dimerization domain-containing protein [Source:UniProtKB/TrEMBL;Acc:Q0WQA4]	REFNigelle_002059.p1	Aqcoe7G073800.1.p	2e-21	AT4G12300.1	cytochrome P450, family 706, subfamily A, polypeptide 4
RN_002060	yes	REFNigelle_002060.p1	AT5G38020.1	2.46e-48	At5g38020 [Source:UniProtKB/TrEMBL;Acc:Q84MB1]	REFNigelle_002060.p1	Aqcoe1G290800.1.p	5e-79	AT3G11480.1	S-adenosyl-L-methionine-dependent methyltransferases superfamily protein
RN_002063	yes	REFNigelle_002063.p1	AT3G04760.2	4.48e-110	Pentatricopeptide repeat-containing protein At3g04760, chloroplastic [Source:UniProtKB/Swiss-Prot;Acc:Q9SR00]	REFNigelle_002063.p1	Aqcoe5G023800.1.p	4e-135	AT3G04760.1	Pentatricopeptide repeat (PPR-like) superfamily protein
RN_002064	no	REFNigelle_002064.p1	AT4G27290.2	0	S-locus lectin protein kinase family protein [Source:UniProtKB/TrEMBL;Acc:A0A1P8B6Y2]	REFNigelle_002064.p1	Aqcoe4G268700.1.p	0	AT4G21380.1	receptor kinase 3
RN_002065	no	ni	ni	ni	ni	ni	ni	ni	ni	ni
RN_002066	no	REFNigelle_002066.p1	AT5G48500.1	1.09e-16	Pathogenic type III effector avirulence factor Avr AvrRpt-cleavage: cleavage site protein [Source:Q8LEL0]	REFNigelle_002066.p1	Aqcoe5G011300.1.p	2e-59	AT5G18310.2	0
RN_002070	no	ni	ni	ni	ni	ni	ni	ni	ni	ni
RN_002075	no	REFNigelle_002075.p1	AT3G05940.1	0	At3g05940 [Source:UniProtKB/TrEMBL;Acc:Q9SFF8]	REFNigelle_002075.p1	Aqcoe5G308000.3.p	0	AT3G05940.1	Protein of unknown function (DUF300)
RN_002076	no	ni	ni	ni	ni	REFNigelle_002076.p1	Aqcoe5G111200.1.p	2e-16	0	0
RN_002077	no	REFNigelle_002077.p1	AT3G12290.1	8.17e-41	FOLD2 description:Bifunctional protein FolD 2 [Source:Q9LHH7]	REFNigelle_002077.p1	Aqcoe5G084200.1.p	1e-42	AT3G12290.1	Amino acid dehydrogenase family protein
RN_002078	no	REFNigelle_002078.p1	AT2G30320.1	5.17e-163	Putative tRNA pseudouridine synthase [Source:UniProtKB/Swiss-Prot;Acc:O22928]	REFNigelle_002078.p1	Aqcoe1G397100.1.p	0	AT2G30320.1	Pseudouridine synthase family protein
RN_002079	no	ni	ni	ni	ni	ni	ni	ni	ni	ni
RN_002080	no	REFNigelle_002080.p1	AT1G52820.1	9.83e-93	2-oxoglutarate (2OG) and Fe(II)-dependent oxygenase superfamily protein [Source:UniProtKB/TrEMBL;Acc:Q9C936]	REFNigelle_002080.p1	Aqcoe4G129200.1.p	7e-148	AT1G52790.1	2-oxoglutarate (2OG) and Fe(II)-dependent oxygenase superfamily protein
RN_002081	no	REFNigelle_002081.p1	AT1G52820.1	3.9e-61	2-oxoglutarate (2OG) and Fe(II)-dependent oxygenase superfamily protein [Source:UniProtKB/TrEMBL;Acc:Q9C936]	REFNigelle_002081.p1	Aqcoe4G129200.1.p	1e-85	AT1G52790.1	2-oxoglutarate (2OG) and Fe(II)-dependent oxygenase superfamily protein
RN_002082	no	ni	ni	ni	ni	ni	ni	ni	ni	ni
RN_002083	no	ni	ni	ni	ni	ni	ni	ni	ni	ni
RN_002084	no	REFNigelle_002084.p1	AT4G04650.1	5.24e-06	AT4g04650 protein [Source:UniProtKB/TrEMBL;Acc:Q9S9V5]	REFNigelle_002084.p1	Aqcoe7G234100.1.p	4e-10	AT4G29090.1	Ribonuclease H-like superfamily protein
RN_002085	no	ni	ni	ni	ni	ni	ni	ni	ni	ni
RN_002086	no	ni	ni	ni	ni	ni	ni	ni	ni	ni
RN_002087	no	ni	ni	ni	ni	ni	ni	ni	ni	ni
RN_002088	no	ni	ni	ni	ni	ni	ni	ni	ni	ni
RN_002089	no	ni	ni	ni	ni	REFNigelle_002089.p1	Aqcoe3G333900.1.p	9e-10	AT4G05095.1	0
RN_002090	no	REFNigelle_002090.p1	AT3G16380.1	1.19e-56	PAB6 description:Polyadenylate-binding protein 6 [Source:O04319]	REFNigelle_002090.p1	Aqcoe5G145800.1.p	2e-49	AT1G49760.2	poly(A) binding protein 8
RN_002091	no	ni	ni	ni	ni	ni	ni	ni	ni	ni
RN_002092	yes	REFNigelle_002092.p1	AT3G16380.1	6.6e-40	PAB6 description:Polyadenylate-binding protein 6 [Source:O04319]	REFNigelle_002092.p2	Aqcoe5G145800.1.p	2e-49	AT1G49760.2	poly(A) binding protein 8
RN_002094	no	ni	ni	ni	ni	ni	ni	ni	ni	ni
RN_002096	yes	REFNigelle_002096.p1	AT3G14470.2	6.33e-14	RPPL1 description:Putative disease resistance RPP13-like protein 1 [Source:Q9LRR4]	REFNigelle_002096.p1	Aqcoe5G371700.3.p	1e-54	AT3G14470.1	NB-ARC domain-containing disease resistance protein
RN_002097	no	REFNigelle_002097.p1	AT5G54140.1	0	ILL3 description:IAA-amino acid hydrolase ILR1-like 3 [Source:O81641]	REFNigelle_002097.p1	Aqcoe5G473600.1.p	0	AT5G54140.1	IAA-leucine-resistant (ILR1)-like 3
RN_002098	no	ni	ni	ni	ni	ni	ni	ni	ni	ni
RN_002100	no	ni	ni	ni	ni	ni	ni	ni	ni	ni
RN_002102	no	REFNigelle_002102.p1	AT5G55340.1	1.98e-107	AT5 description:Probable long-chain-alcohol O-fatty-acyltransferase 5 [Source:Q9FJ76]	REFNigelle_002102.p1	Aqcoe6G313200.1.p	3e-129	AT5G55340.1	MBOAT (membrane bound O-acyl transferase) family protein
RN_002103	no	ni	ni	ni	ni	ni	ni	ni	ni	ni
RN_002104	no	ni	ni	ni	ni	ni	ni	ni	ni	ni
RN_002105	no	REFNigelle_002105.p1	AT4G13710.1	0	Probable pectate lyase 15 [Source:UniProtKB/Swiss-Prot;Acc:Q944R1]	REFNigelle_002105.p1	Aqcoe5G006300.1.p	0	AT4G13710.1	Pectin lyase-like superfamily protein
RN_002106	yes	ni	ni	ni	ni	ni	ni	ni	ni	ni
RN_002107	no	REFNigelle_002107.p1	AT4G23160.2	4.84e-47	CRK8 description:cysteine-rich RLK (RECEPTOR-like protein kinase) 8 [Source:AT4G23160]	REFNigelle_002107.p2	Aqcoe5G193900.1.p	1e-05	AT5G28780.1	PIF1 helicase
RN_002108	no	REFNigelle_002108.p1	AT3G02680.1	2.63e-135	NBS1 description:Nijmegen breakage syndrome 1 protein [Source:Q0H8D7]	REFNigelle_002108.p1	Aqcoe3G438400.1.p	0	AT3G02680.1	nijmegen breakage syndrome 1
RN_002109	no	ni	ni	ni	ni	ni	ni	ni	ni	ni
RN_002110	no	REFNigelle_002110.p1	AT5G07900.1	9.01e-87	Mitochondrial transcription termination factor family protein [Source:UniProtKB/TrEMBL;Acc:Q9SD94]	REFNigelle_002110.p1	Aqcoe2G034600.1.p	1e-119	AT5G07900.1	Mitochondrial transcription termination factor family protein
RN_002112	no	REFNigelle_002112.p1	AT5G33406.1	9.12e-65	HAT dimerization domain-containing protein / transposase-like protein [Source:UniProtKB/TrEMBL;Acc:F4KHA1]	REFNigelle_002112.p1	Aqcoe7G073800.2.p	1e-44	AT4G12300.1	cytochrome P450, family 706, subfamily A, polypeptide 4
RN_002113	no	REFNigelle_002113.p1	AT2G34400.1	1.79e-91	PCMP-E23 description:Pentatricopeptide repeat-containing protein At2g34400 [Source:O64705]	REFNigelle_002113.p1	Aqcoe7G249700.1.p	2e-137	AT3G47570.1	Leucine-rich repeat protein kinase family protein
RN_002115	no	REFNigelle_002115.p1	AT5G41120.3	0	Esterase/lipase/thioesterase family protein [Source:UniProtKB/TrEMBL;Acc:Q9FLL7]	REFNigelle_002115.p1	Aqcoe5G342400.1.p	0	AT1G54570.1	Esterase/lipase/thioesterase family protein
RN_002117	no	REFNigelle_002117.p1	AT5G47900.1	0	Protein of unknown function (DUF1624) [Source:TAIR;Acc:AT5G47900]	REFNigelle_002117.p1	Aqcoe5G310400.1.p	0	AT5G47900.1	Protein of unknown function (DUF1624)
RN_002118	no	REFNigelle_002118.p1	AT5G65730.1	3.83e-167	XTH6 description:Xyloglucan endotransglucosylase/hydrolase [Source:Q0WUU2]	REFNigelle_002118.p1	Aqcoe7G355700.1.p	5e-161	AT5G65730.1	xyloglucan endotransglucosylase/hydrolase 6
RN_002119	no	REFNigelle_002119.p1	AT4G17420.1	3.26e-151	Tryptophan RNA-binding attenuator protein-like protein [Source:UniProtKB/TrEMBL;Acc:Q84J77]	REFNigelle_002119.p1	Aqcoe5G054000.1.p	0	AT4G17420.1	Tryptophan RNA-binding attenuator protein-like
RN_002120	no	ni	ni	ni	ni	ni	ni	ni	ni	ni
RN_002122	no	REFNigelle_002122.p1	AT5G53970.1	0	Probable aminotransferase TAT2 [Source:UniProtKB/Swiss-Prot;Acc:Q9FN30]	REFNigelle_002122.p1	Aqcoe4G088900.1.p	0	AT5G53970.1	Tyrosine transaminase family protein
RN_002123	no	ni	ni	ni	ni	ni	ni	ni	ni	ni
RN_002124	yes	REFNigelle_002124.p1	AT5G28750.1	6.1e-34	TATA description:Sec-independent protein translocase protein TATA, chloroplastic [Source:Q9LKU2]	REFNigelle_002124.p1	Aqcoe5G042800.1.p	3e-50	AT5G28750.1	Bacterial sec-independent translocation protein mttA/Hcf106
RN_002125	no	REFNigelle_002125.p1	AT1G12940.1	0	NRT2.5 description:High affinity nitrate transporter 2.5 [Source:Q9LPV5]	REFNigelle_002125.p1	Aqcoe3G278300.1.p	0	AT1G12940.1	nitrate transporter2.5
RN_002126	yes	REFNigelle_002126.p1	AT1G43760.1	3.68e-12	DNAse I-like superfamily protein [Source:UniProtKB/TrEMBL;Acc:F4ICS8]	REFNigelle_002126.p1	Aqcoe2G174500.1.p	3e-15	0	0
RN_002127	no	REFNigelle_002127.p1	AT1G28600.2	7.57e-64	GDSL esterase/lipase At1g28600 [Source:UniProtKB/Swiss-Prot;Acc:Q94F40]	REFNigelle_002127.p1	Aqcoe1G283300.1.p	4e-93	AT1G28600.1	GDSL-like Lipase/Acylhydrolase superfamily protein
RN_002128	no	ni	ni	ni	ni	ni	ni	ni	ni	ni
RN_002129	no	REFNigelle_002129.p1	AT1G11890.1	8.9e-147	SEC22 description:SEC22 [Source:A0A178WBU4]	REFNigelle_002129.p1	Aqcoe3G105200.1.p	5e-154	AT1G11890.1	Synaptobrevin family protein
RN_002132	no	ni	ni	ni	ni	ni	ni	ni	ni	ni
RN_002133	no	REFNigelle_002133.p1	AT1G63080.3	5.43e-62	Pentatricopeptide repeat-containing protein At1g63080, mitochondrial [Source:UniProtKB/Swiss-Prot;Acc:Q9CAN5]	REFNigelle_002133.p1	Aqcoe7G038000.1.p	2e-106	AT1G62930.1	Tetratricopeptide repeat (TPR)-like superfamily protein
RN_002134	yes	REFNigelle_002134.p1	AT5G55050.1	5.7e-58	GDSL esterase/lipase At5g55050 [Source:UniProtKB/Swiss-Prot;Acc:Q9FIA1]	REFNigelle_002134.p1	Aqcoe1G291100.1.p	2e-135	AT5G55050.1	GDSL-like Lipase/Acylhydrolase superfamily protein
RN_002135	no	REFNigelle_002135.p1	AT1G43760.1	2.04e-05	DNAse I-like superfamily protein [Source:UniProtKB/TrEMBL;Acc:F4ICS8]	REFNigelle_002135.p1	Aqcoe6G266000.1.p	1e-10	AT1G43760.1	DNAse I-like superfamily protein
RN_002136	no	REFNigelle_002136.p1	AT5G33406.1	1.18e-29	HAT dimerization domain-containing protein / transposase-like protein [Source:UniProtKB/TrEMBL;Acc:F4KHA1]	REFNigelle_002136.p1	Aqcoe7G073800.1.p	8e-18	AT4G12300.1	cytochrome P450, family 706, subfamily A, polypeptide 4
RN_002138	no	ni	ni	ni	ni	ni	ni	ni	ni	ni
RN_002139	no	ni	ni	ni	ni	ni	ni	ni	ni	ni
RN_002140	no	ni	ni	ni	ni	ni	ni	ni	ni	ni
RN_002141	no	ni	ni	ni	ni	REFNigelle_002141.p1	Aqcoe5G346400.2.p	0	0	0
RN_002142	no	ni	ni	ni	ni	ni	ni	ni	ni	ni
RN_002143	no	REFNigelle_002143.p1	AT4G23820.1	0	Pectin lyase-like superfamily protein [Source:UniProtKB/TrEMBL;Acc:Q9SUP5]	REFNigelle_002143.p1	Aqcoe5G454900.2.p	0	AT4G23820.1	Pectin lyase-like superfamily protein
RN_002145	no	ni	ni	ni	ni	REFNigelle_002145.p1	Aqcoe1G192200.1.p	4e-19	0	0
RN_002146	no	REFNigelle_002146.p1	AT1G17840.1	0	ABCG11 description:ABC transporter G family member 11 [Source:Q8RXN0]	REFNigelle_002146.p1	Aqcoe6G079200.1.p	0	AT1G17840.1	white-brown complex homolog protein 11
RN_002147	no	REFNigelle_002147.p1	AT1G17840.1	0	ABCG11 description:ABC transporter G family member 11 [Source:Q8RXN0]	REFNigelle_002147.p1	Aqcoe6G079200.1.p	0	AT1G17840.1	white-brown complex homolog protein 11
RN_002148	no	REFNigelle_002148.p1	AT4G30100.1	0	P-loop containing nucleoside triphosphate hydrolases superfamily protein [Source:UniProtKB/TrEMBL;Acc:Q9SZW3]	REFNigelle_002148.p1	Aqcoe6G062000.1.p	0	AT4G30100.1	P-loop containing nucleoside triphosphate hydrolases superfamily protein
RN_002149	no	ni	ni	ni	ni	ni	ni	ni	ni	ni
RN_002150	no	REFNigelle_002150.p1	AT3G02250.1	4.09e-18	OFUT21 description:O-fucosyltransferase 21 [Source:Q93ZR8]	REFNigelle_002150.p1	Aqcoe3G068000.2.p	6e-20	AT5G15740.1	O-fucosyltransferase family protein
RN_002151	no	ni	ni	ni	ni	ni	ni	ni	ni	ni
RN_002153	no	ni	ni	ni	ni	ni	ni	ni	ni	ni
RN_002154	no	REFNigelle_002154.p1	AT1G67310.1	0	CAMTA4 description:Calmodulin-binding transcription activator 4 [Source:Q9FYG2]	REFNigelle_002154.p1	Aqcoe5G353100.1.p	0	AT1G67310.1	Calmodulin-binding transcription activator protein with CG-1 and Ankyrin domains
RN_002156	no	REFNigelle_002156.p1	AT5G64230.1	5.83e-83	unknown protein; FUNCTIONS IN: molecular_function unknown; INVOLVED IN:AT5G64230]	REFNigelle_002156.p1	Aqcoe6G083000.1.p	2e-155	AT5G64230.1	0
RN_002157	no	REFNigelle_002157.p1	AT3G54400.1	0	AT3g54400/T12E18_90 [Source:UniProtKB/TrEMBL;Acc:Q9M2U7]	REFNigelle_002157.p1	Aqcoe2G041400.2.p	0	AT3G54400.1	Eukaryotic aspartyl protease family protein
RN_002158	no	REFNigelle_002158.p1	AT5G13520.1	0	LKHA4 description:Leucine aminopeptidase [Source:Q9FY49]	REFNigelle_002158.p1	Aqcoe1G486300.1.p	0	AT5G13520.1	peptidase M1 family protein
RN_002159	no	ni	ni	ni	ni	ni	ni	ni	ni	ni
RN_002160	no	ni	ni	ni	ni	ni	ni	ni	ni	ni
RN_002162	no	REFNigelle_002162.p1	AT5G43810.3	0	AGO10 description:Protein argonaute 10 [Source:Q9XGW1]	REFNigelle_002162.p1	Aqcoe7G204100.2.p	0	AT5G43810.1	Stabilizer of iron transporter SufD / Polynucleotidyl transferase
RN_002163	no	REFNigelle_002163.p1	AT5G17440.2	1.54e-166	AT5g17440/K3M16_10 [Source:UniProtKB/TrEMBL;Acc:Q940U9]	REFNigelle_002163.p1	Aqcoe2G434700.1.p	3e-150	AT5G17440.1	LUC7 related protein
RN_002167	no	REFNigelle_002167.p1	AT5G35410.1	0	CIPK24 description:Non-specific serine/threonine protein kinase [Source:A0A178UB05]	REFNigelle_002167.p1	Aqcoe7G387500.3.p	0	AT5G35410.1	Protein kinase superfamily protein
RN_002172	no	REFNigelle_002172.p1	AT4G16660.1	1.11e-177	heat shock protein 70 (Hsp 70) family protein [Source:TAIR;Acc:AT4G16660]	REFNigelle_002172.p2	Aqcoe1G166300.1.p	0	AT4G16660.1	heat shock protein 70 (Hsp 70) family protein
RN_002174	yes	REFNigelle_002174.p1	AT5G49160.1	0	DMT1 description:DNA (cytosine-5)-methyltransferase 1 [Source:P34881]	REFNigelle_002174.p1	Aqcoe1G313500.1.p	0	AT5G49160.1	methyltransferase 1
RN_002175	no	REFNigelle_002175.p1	AT2G30600.6	0	BTB/POZ domain-containing protein [Source:UniProtKB/TrEMBL;Acc:F4INV5]	REFNigelle_002175.p1	Aqcoe5G122600.2.p	0	AT2G30600.5	BTB/POZ domain-containing protein
RN_002176	no	ni	ni	ni	ni	ni	ni	ni	ni	ni
RN_002177	no	ni	ni	ni	ni	REFNigelle_002177.p1	Aqcoe5G478400.1.p	1e-05	AT1G76890.2	Duplicated homeodomain-like superfamily protein
RN_002179	no	REFNigelle_002179.p2	AT1G33290.3	1.51e-96	At1g33290 [Source:UniProtKB/TrEMBL;Acc:Q9C877]	REFNigelle_002179.p2	Aqcoe6G003600.1.p	3e-108	AT1G33290.1	P-loop containing nucleoside triphosphate hydrolases superfamily protein
RN_002180	no	REFNigelle_002180.p1	AT2G17030.1	5.87e-28	SKIP23 description:F-box protein SKIP23 [Source:Q3EBZ2]	REFNigelle_002180.p1	Aqcoe7G406300.1.p	3e-107	AT5G55150.1	Protein of unknown function (DUF295)
RN_002181	no	REFNigelle_002181.p1	AT2G25970.1	1.54e-13	F17H15.1/F17H15.1 [Source:UniProtKB/TrEMBL;Acc:O82762]	REFNigelle_002181.p1	Aqcoe7G133500.1.p	3e-98	AT2G25970.1	KH domain-containing protein
RN_002182	no	REFNigelle_002182.p1	AT2G01050.1	1.02e-09	Zinc ion binding / nucleic acid binding protein [Source:UniProtKB/TrEMBL;Acc:Q9SJW1]	REFNigelle_002182.p1	Aqcoe5G234500.1.p	1e-23	AT1G43760.1	DNAse I-like superfamily protein
RN_002184	no	REFNigelle_002184.p1	AT5G18880.1	1.93e-06	RNA-directed DNA polymerase (Reverse transcriptase)-related family protein [Source:UniProtKB/TrEMBL;Acc:Q3E9D7]	REFNigelle_002184.p1	Aqcoe3G174500.1.p	5e-13	AT3G09510.1	Ribonuclease H-like superfamily protein
RN_002185	no	REFNigelle_002185.p1	AT1G69290.1	1.27e-46	Pentatricopeptide repeat-containing protein At1g69290 [Source:UniProtKB/Swiss-Prot;Acc:P0C7R4]	REFNigelle_002185.p1	Aqcoe3G366300.1.p	6e-59	AT1G69290.1	Pentatricopeptide repeat (PPR) superfamily protein
RN_002188	no	REFNigelle_002188.p1	AT3G45980.1	9.41e-69	H2B description:Histone H2B [Source:A0A178V9F6]	REFNigelle_002188.p1	Aqcoe3G407600.1.p	5e-55	AT3G45980.1	Histone superfamily protein
RN_002190	no	ni	ni	ni	ni	ni	ni	ni	ni	ni
RN_002191	no	ni	ni	ni	ni	ni	ni	ni	ni	ni
RN_002192	no	ni	ni	ni	ni	ni	ni	ni	ni	ni
RN_002193	no	ni	ni	ni	ni	REFNigelle_002193.p1	Aqcoe4G244400.1.p	4e-05	AT1G43760.1	DNAse I-like superfamily protein
RN_002194	no	REFNigelle_002194.p1	AT1G43260.1	2.47e-11	HAT transposon superfamily protein [Source:UniProtKB/TrEMBL;Acc:F4IB51]	REFNigelle_002194.p1	Aqcoe7G073800.2.p	3e-05	AT4G12300.1	cytochrome P450, family 706, subfamily A, polypeptide 4
RN_002196	no	ni	ni	ni	ni	ni	ni	ni	ni	ni
RN_002197	yes	REFNigelle_002197.p1	AT4G10770.2	1.98e-11	OPT7 description:Oligopeptide transporter 7 [Source:O82485]	REFNigelle_002197.p1	Aqcoe5G211200.5.p	2e-13	AT4G10770.1	oligopeptide transporter 7
RN_002198	no	REFNigelle_002198.p1	AT5G54250.2	0	CNGC4 description:Cyclic nucleotide-gated ion channel 4 [Source:Q94AS9]	REFNigelle_002198.p1	Aqcoe4G259900.1.p	0	AT5G54250.2	cyclic nucleotide-gated cation channel 4
RN_002199	no	ni	ni	ni	ni	ni	ni	ni	ni	ni
RN_002201	no	ni	ni	ni	ni	ni	ni	ni	ni	ni
RN_002202	no	REFNigelle_002202.p1	AT5G33406.1	4.96e-66	HAT dimerization domain-containing protein / transposase-like protein [Source:UniProtKB/TrEMBL;Acc:F4KHA1]	REFNigelle_002202.p1	Aqcoe7G073800.2.p	7e-45	AT4G12300.1	cytochrome P450, family 706, subfamily A, polypeptide 4
RN_002203	no	ni	ni	ni	ni	ni	ni	ni	ni	ni
RN_002204	no	REFNigelle_002204.p1	AT1G11330.2	0	G-type lectin S-receptor-like serine/threonine-protein kinase At1g11330 [Source:UniProtKB/Swiss-Prot;Acc:Q9SXB8]	REFNigelle_002204.p1	Aqcoe1G244900.1.p	0	AT1G11330.1	S-locus lectin protein kinase family protein
RN_002205	no	ni	ni	ni	ni	ni	ni	ni	ni	ni
RN_002206	no	REFNigelle_002206.p2	AT3G24255.7	4.17e-09	RNA-directed DNA polymerase (Reverse transcriptase)-related family protein [Source:UniProtKB/TrEMBL;Acc:A0A1I9LSY4]	REFNigelle_002206.p1	Aqcoe3G174500.1.p	2e-14	AT3G09510.1	Ribonuclease H-like superfamily protein
RN_002207	no	REFNigelle_002207.p1	AT1G04880.1	0.00055	HMGB15 description:High mobility group B protein 15 [Source:Q9MAT6]	ni	ni	ni	ni	ni
RN_002208	no	REFNigelle_002208.p1	AT3G24255.4	1.25e-25	RNA-directed DNA polymerase (Reverse transcriptase)-related family protein [Source:UniProtKB/TrEMBL;Acc:A0A1I9LSY4]	REFNigelle_002208.p1	Aqcoe4G244400.1.p	7e-21	AT1G43760.1	DNAse I-like superfamily protein
RN_002209	no	REFNigelle_002209.p1	AT1G07650.4	3.43e-26	Leucine-rich repeat transmembrane protein kinase [Source:UniProtKB/TrEMBL;Acc:F4HSE1]	REFNigelle_002209.p1	Aqcoe4G025700.1.p	1e-44	AT3G14840.2	Leucine-rich repeat transmembrane protein kinase
RN_002210	no	REFNigelle_002210.p1	AT3G14470.2	1.74e-97	RPPL1 description:Putative disease resistance RPP13-like protein 1 [Source:Q9LRR4]	REFNigelle_002210.p1	Aqcoe6G185400.2.p	0	AT3G14460.1	LRR and NB-ARC domains-containing disease resistance protein
RN_002211	no	REFNigelle_002211.p1	AT3G15130.1	4.57e-85	PCMP-H86 description:Putative pentatricopeptide repeat-containing protein At3g15130 [Source:P0C898]	REFNigelle_002211.p1	Aqcoe6G039800.1.p	4e-135	AT3G15130.1	Tetratricopeptide repeat (TPR)-like superfamily protein
RN_002212	no	ni	ni	ni	ni	ni	ni	ni	ni	ni
RN_002213	yes	ni	ni	ni	ni	ni	ni	ni	ni	ni
RN_002214	no	ni	ni	ni	ni	ni	ni	ni	ni	ni
RN_002215	yes	REFNigelle_002215.p1	AT3G24255.4	5.03e-33	RNA-directed DNA polymerase (Reverse transcriptase)-related family protein [Source:UniProtKB/TrEMBL;Acc:A0A1I9LSY4]	REFNigelle_002215.p2	Aqcoe2G128200.1.p	1e-22	0	0
RN_002216	no	ni	ni	ni	ni	ni	ni	ni	ni	ni
RN_002217	no	ni	ni	ni	ni	ni	ni	ni	ni	ni
RN_002218	no	REFNigelle_002218.p1	AT1G53430.2	1.08e-143	Probable LRR receptor-like serine/threonine-protein kinase At1g53430 [Source:UniProtKB/Swiss-Prot;Acc:C0LGG8]	REFNigelle_002218.p1	Aqcoe4G025800.2.p	1e-169	AT1G07650.2	Leucine-rich repeat transmembrane protein kinase
RN_002219	no	ni	ni	ni	ni	ni	ni	ni	ni	ni
RN_002220	no	REFNigelle_002220.p1	AT3G14470.2	1.23e-48	RPPL1 description:Putative disease resistance RPP13-like protein 1 [Source:Q9LRR4]	REFNigelle_002220.p1	Aqcoe6G185400.1.p	0	AT3G14460.1	LRR and NB-ARC domains-containing disease resistance protein
RN_002221	no	REFNigelle_002221.p3	AT1G08040.3	3.22e-62	Putative storage protein [Source:UniProtKB/TrEMBL;Acc:Q93ZR2]	REFNigelle_002221.p3	Aqcoe1G141800.1.p	4e-67	AT2G28310.3	Protein of unknown function (DUF707)
RN_002222	no	REFNigelle_002222.p1	AT5G04120.1	4.16e-116	IPSP description:Metal-independent phosphoserine phosphatase [Source:F4KI56]	REFNigelle_002222.p1	Aqcoe1G045000.1.p	1e-162	AT5G04120.1	Phosphoglycerate mutase family protein
RN_002223	no	REFNigelle_002223.p1	AT2G47210.2	1.59e-71	SWC4 description:SWR1-complex protein 4 [Source:Q8VZL6]	REFNigelle_002223.p1	Aqcoe2G089200.1.p	5e-97	AT2G47210.1	myb-like transcription factor family protein
RN_002224	no	ni	ni	ni	ni	ni	ni	ni	ni	ni
RN_002225	no	REFNigelle_002225.p2	AT4G02750.1	5.56e-76	PCMP-H24 description:Pentatricopeptide repeat-containing protein At4g02750 [Source:Q9SY02]	REFNigelle_002225.p1	Aqcoe7G027700.2.p	2e-148	AT2G46050.1	Pentatricopeptide repeat (PPR-like) superfamily protein
RN_002226	no	ni	ni	ni	ni	ni	ni	ni	ni	ni
RN_002227	yes	ni	ni	ni	ni	ni	ni	ni	ni	ni
RN_002228	no	ni	ni	ni	ni	ni	ni	ni	ni	ni
RN_002229	no	ni	ni	ni	ni	ni	ni	ni	ni	ni
RN_002230	no	REFNigelle_002230.p1	AT4G32920.1	6.23e-140	Glycine-rich protein [Source:UniProtKB/TrEMBL;Acc:F4JV81]	REFNigelle_002230.p1	Aqcoe7G143900.1.p	4e-141	AT5G11700.2	0
RN_002231	no	ni	ni	ni	ni	ni	ni	ni	ni	ni
RN_002232	no	REFNigelle_002232.p1	AT3G62020.1	3.99e-107	GLP10 description:At3g62020 [Source:A0JQ09]	REFNigelle_002232.p1	Aqcoe2G035400.1.p	3e-135	AT1G02335.1	germin-like protein subfamily 2 member 2 precursor
RN_002233	no	ni	ni	ni	ni	ni	ni	ni	ni	ni
RN_002234	no	REFNigelle_002234.p1	AT5G22830.2	0	MRS2-11 description:MRS2-11 [Source:A0A178ULQ2]	REFNigelle_002234.p1	Aqcoe1G118300.1.p	0	AT5G22830.1	magnesium (Mg) transporter 10
RN_002235	no	REFNigelle_002235.p1	AT3G26380.1	0	Alpha-galactosidase [Source:UniProtKB/TrEMBL;Acc:F4JCI4]	REFNigelle_002235.p1	Aqcoe5G395000.1.p	0	AT3G26380.1	Melibiase family protein
RN_002236	no	REFNigelle_002236.p2	AT2G38460.5	1.2e-75	IREG1 description:Solute carrier family 40 member 1 [Source:O80905]	REFNigelle_002236.p2	Aqcoe1G393100.2.p	6e-108	AT5G03570.2	iron regulated 2
RN_002237	no	REFNigelle_002237.p1	AT5G46240.1	0	KAT1 description:At5g46240 [Source:Q67YG3]	REFNigelle_002237.p1	Aqcoe4G001400.1.p	0	AT5G46240.1	potassium channel in Arabidopsis thaliana 1
RN_002238	no	REFNigelle_002238.p1	AT5G27970.4	0	ARM repeat superfamily protein [Source:UniProtKB/TrEMBL;Acc:F4K5S0]	REFNigelle_002238.p1	Aqcoe2G346100.1.p	0	AT5G27970.1	ARM repeat superfamily protein
RN_002239	no	REFNigelle_002239.p1	AT5G14790.1	5.86e-123	ARM repeat superfamily protein [Source:UniProtKB/TrEMBL;Acc:Q9LEQ9]	REFNigelle_002239.p1	Aqcoe3G295300.1.p	4e-149	AT3G01450.1	ARM repeat superfamily protein
RN_002240	no	ni	ni	ni	ni	ni	ni	ni	ni	ni
RN_002241	no	REFNigelle_002241.p1	AT3G15130.1	4.57e-85	PCMP-H86 description:Putative pentatricopeptide repeat-containing protein At3g15130 [Source:P0C898]	REFNigelle_002241.p1	Aqcoe6G039800.1.p	4e-135	AT3G15130.1	Tetratricopeptide repeat (TPR)-like superfamily protein
RN_002242	no	REFNigelle_002242.p1	AT1G43760.1	2.56e-10	DNAse I-like superfamily protein [Source:UniProtKB/TrEMBL;Acc:F4ICS8]	REFNigelle_002242.p1	Aqcoe4G180100.1.p	1e-12	AT1G43760.1	DNAse I-like superfamily protein
RN_002243	no	REFNigelle_002243.p1	AT3G54950.1	1.15e-112	PLP7 description:Patatin-like protein 7 [Source:Q9SV43]	REFNigelle_002243.p1	Aqcoe4G024900.1.p	7e-178	AT3G54950.1	patatin-like protein 6
RN_002244	no	REFNigelle_002244.p1	AT1G43730.1	1.58e-07	RNA-directed DNA polymerase (Reverse transcriptase)-related family protein [Source:UniProtKB/TrEMBL;Acc:F4ICS7]	REFNigelle_002244.p1	Aqcoe3G131700.1.p	2e-16	AT1G60720.1	RNA-directed DNA polymerase (reverse transcriptase)-related family protein
RN_002245	no	ni	ni	ni	ni	ni	ni	ni	ni	ni
RN_002247	no	ni	ni	ni	ni	ni	ni	ni	ni	ni
RN_002248	no	REFNigelle_002248.p1	AT5G19440.1	8.29e-174	At5g19440 [Source:UniProtKB/TrEMBL;Acc:Q29Q34]	REFNigelle_002248.p1	Aqcoe1G024400.1.p	2e-177	AT5G19440.1	NAD(P)-binding Rossmann-fold superfamily protein
RN_002249	no	ni	ni	ni	ni	REFNigelle_002249.p1	Aqcoe1G452800.1.p	4e-25	0	0
RN_002250	no	ni	ni	ni	ni	ni	ni	ni	ni	ni
RN_002252	no	ni	ni	ni	ni	ni	ni	ni	ni	ni
RN_002253	no	ni	ni	ni	ni	ni	ni	ni	ni	ni
RN_002255	no	ni	ni	ni	ni	ni	ni	ni	ni	ni
RN_002256	no	ni	ni	ni	ni	ni	ni	ni	ni	ni
RN_002257	yes	REFNigelle_002257.p1	AT1G17330.1	1.12e-58	At1g17330 [Source:UniProtKB/TrEMBL;Acc:Q8GUM8]	REFNigelle_002257.p1	Aqcoe3G434300.7.p	2e-73	AT1G17330.1	Metal-dependent phosphohydrolase
RN_002258	no	ni	ni	ni	ni	REFNigelle_002258.p2	Aqcoe7G233700.1.p	8e-13	AT1G40087.1	Plant transposase (Ptta/En/Spm family)
RN_002259	no	ni	ni	ni	ni	ni	ni	ni	ni	ni
RN_002260	no	ni	ni	ni	ni	ni	ni	ni	ni	ni
RN_002261	no	REFNigelle_002261.p1	ATMG00860.1	2.63e-24	ORF158 description:Uncharacterized mitochondrial protein AtMg00860 [Source:P92523]	REFNigelle_002261.p1	Aqcoe7G172200.1.p	9e-40	AT4G37670.2	N-acetyl-l-glutamate synthase 2
RN_002262	no	ni	ni	ni	ni	ni	ni	ni	ni	ni
RN_002263	no	ni	ni	ni	ni	ni	ni	ni	ni	ni
RN_002264	yes	ni	ni	ni	ni	ni	ni	ni	ni	ni
RN_002265	no	ni	ni	ni	ni	REFNigelle_002265.p1	Aqcoe6G275700.1.p	8e-10	0	0
RN_002266	yes	ni	ni	ni	ni	ni	ni	ni	ni	ni
RN_002267	no	ni	ni	ni	ni	ni	ni	ni	ni	ni
RN_002268	no	REFNigelle_002268.p1	AT5G16110.1	2.03e-10	Uncharacterized protein T21H19_30 [Source:UniProtKB/TrEMBL;Acc:Q9LF17]	REFNigelle_002268.p1	Aqcoe7G294900.1.p	2e-57	AT3G02555.1	0
RN_002269	no	REFNigelle_002269.p1	AT5G57940.2	0	CNGC5 description:Probable cyclic nucleotide-gated ion channel 5 [Source:Q8RWS9]	REFNigelle_002269.p1	Aqcoe1G353700.2.p	0	AT4G30560.1	cyclic nucleotide gated channel 9
RN_002270	no	REFNigelle_002270.p1	AT3G14470.2	8.39e-85	RPPL1 description:Putative disease resistance RPP13-like protein 1 [Source:Q9LRR4]	REFNigelle_002270.p1	Aqcoe6G185400.1.p	0	AT3G14460.1	LRR and NB-ARC domains-containing disease resistance protein
RN_002275	no	REFNigelle_002275.p1	AT1G73320.1	2.78e-109	S-adenosyl-L-methionine-dependent methyltransferases superfamily protein [Source:UniProtKB/TrEMBL;Acc:Q5Q0D4]	REFNigelle_002275.p1	Aqcoe2G042400.1.p	9e-151	AT1G73320.1	S-adenosyl-L-methionine-dependent methyltransferases superfamily protein
RN_002276	no	REFNigelle_002276.p1	AT3G49660.1	8.56e-14	WDR5A description:WDR5a [Source:A0A178VK59]	REFNigelle_002276.p1	Aqcoe5G440100.1.p	0	AT3G49660.1	Transducin/WD40 repeat-like superfamily protein
RN_002278	no	REFNigelle_002278.p1	AT5G43270.2	8.4e-80	SPL2 description:Squamosa promoter-binding-like protein 2 [Source:Q9S840]	REFNigelle_002278.p1	Aqcoe7G241600.4.p	0	AT5G43270.1	squamosa promoter binding protein-like 2
RN_002279	no	REFNigelle_002279.p1	AT5G51410.5	1.52e-151	Arginine-aspartate-rich RNA binding protein-like [Source:UniProtKB/TrEMBL;Acc:P94088]	REFNigelle_002279.p1	Aqcoe7G082300.2.p	1e-169	AT5G51410.2	LUC7 N_terminus domain-containing protein
RN_002280	no	ni	ni	ni	ni	ni	ni	ni	ni	ni
RN_002281	no	REFNigelle_002281.p1	AT1G43260.1	4.8e-114	HAT transposon superfamily protein [Source:UniProtKB/TrEMBL;Acc:F4IB51]	REFNigelle_002281.p1	Aqcoe7G073800.1.p	1e-67	AT4G12300.1	cytochrome P450, family 706, subfamily A, polypeptide 4
RN_002282	no	ni	ni	ni	ni	ni	ni	ni	ni	ni
RN_002283	no	ni	ni	ni	ni	ni	ni	ni	ni	ni
RN_002284	no	ni	ni	ni	ni	ni	ni	ni	ni	ni
RN_002285	no	REFNigelle_002285.p1	AT1G29810.1	7.56e-65	PDL2 description:Pterin-4-alpha-carbinolamine dehydratase 2, mitochondrial [Source:Q6QJ72]	REFNigelle_002285.p1	Aqcoe4G013200.5.p	2e-94	AT1G29810.1	Transcriptional coactivator/pterin dehydratase
RN_002288	no	ni	ni	ni	ni	ni	ni	ni	ni	ni
RN_002290	no	ni	ni	ni	ni	ni	ni	ni	ni	ni
RN_002291	no	REFNigelle_002291.p1	AT2G35120.1	1.18e-83	GDH2 description:Glycine cleavage system H protein 2, mitochondrial [Source:O82179]	REFNigelle_002291.p1	Aqcoe1G166700.1.p	4e-89	AT2G35120.1	Single hybrid motif superfamily protein
RN_002292	no	REFNigelle_002292.p1	ATMG00810.1	1.62e-24	ORF240B description:Uncharacterized mitochondrial protein AtMg00810 [Source:P92519]	ni	ni	ni	ni	ni
RN_002293	no	REFNigelle_002293.p2	AT3G14660.2	2.17e-114	CYP72A13 description:Cytochrome P450 72A13 [Source:Q9LUC8]	REFNigelle_002293.p2	Aqcoe4G136800.1.p	3e-128	AT3G14690.1	cytochrome P450, family 72, subfamily A, polypeptide 15
RN_002294	no	REFNigelle_002294.p1	AT3G14470.2	1.26e-28	RPPL1 description:Putative disease resistance RPP13-like protein 1 [Source:Q9LRR4]	REFNigelle_002294.p1	Aqcoe6G185400.2.p	2e-57	AT3G14460.1	LRR and NB-ARC domains-containing disease resistance protein
RN_002295	no	REFNigelle_002295.p1	AT5G33406.1	4.67e-51	HAT dimerization domain-containing protein / transposase-like protein [Source:UniProtKB/TrEMBL;Acc:F4KHA1]	REFNigelle_002295.p1	Aqcoe7G073800.1.p	2e-22	AT4G12300.1	cytochrome P450, family 706, subfamily A, polypeptide 4
RN_002296	no	REFNigelle_002296.p2	AT4G12080.1	1.94e-26	AHL1 description:ATAHL1 [Source:A0A178V7H8]	REFNigelle_002296.p2	Aqcoe2G186700.1.p	4e-34	AT5G51590.1	AT hook motif DNA-binding family protein
RN_002297	no	ni	ni	ni	ni	ni	ni	ni	ni	ni
RN_002298	no	ni	ni	ni	ni	ni	ni	ni	ni	ni
RN_002299	no	REFNigelle_002299.p1	ATMG00860.1	3.62e-29	ORF158 description:Uncharacterized mitochondrial protein AtMg00860 [Source:P92523]	REFNigelle_002299.p1	Aqcoe7G257100.1.p	3e-14	ATMG00860.1	DNA/RNA polymerases superfamily protein
RN_002300	no	ni	ni	ni	ni	ni	ni	ni	ni	ni
RN_002301	no	ni	ni	ni	ni	ni	ni	ni	ni	ni
RN_002302	no	REFNigelle_002302.p1	AT4G23160.2	1.21e-34	CRK8 description:cysteine-rich RLK (RECEPTOR-like protein kinase) 8 [Source:AT4G23160]	ni	ni	ni	ni	ni
RN_002303	no	ni	ni	ni	ni	ni	ni	ni	ni	ni
RN_002305	no	ni	ni	ni	ni	REFNigelle_002305.p2	Aqcoe2G128200.1.p	4e-21	0	0
RN_002306	yes	ni	ni	ni	ni	ni	ni	ni	ni	ni
RN_002307	no	ni	ni	ni	ni	ni	ni	ni	ni	ni
RN_002308	yes	ni	ni	ni	ni	ni	ni	ni	ni	ni
RN_002309	no	REFNigelle_002309.p1	AT3G24255.4	3.71e-19	RNA-directed DNA polymerase (Reverse transcriptase)-related family protein [Source:UniProtKB/TrEMBL;Acc:A0A1I9LSY4]	REFNigelle_002309.p2	Aqcoe4G250500.1.p	3e-15	AT2G02650.1	Ribonuclease H-like superfamily protein
RN_002310	no	REFNigelle_002310.p1	AT4G33990.1	0	EMB2758 description:Pentatricopeptide repeat-containing protein At4g33990 [Source:O81767]	REFNigelle_002310.p1	Aqcoe5G318400.1.p	0	AT3G12770.1	mitochondrial editing factor 22
RN_002311	no	ni	ni	ni	ni	ni	ni	ni	ni	ni
RN_002312	no	REFNigelle_002312.p1	AT1G07390.4	1.32e-30	AtRLP1 description:Receptor like protein 1 [Source:F4HQM4]	REFNigelle_002312.p1	Aqcoe5G077400.1.p	2e-48	AT2G25470.1	receptor like protein 21
RN_002313	no	ni	ni	ni	ni	ni	ni	ni	ni	ni
RN_002314	no	ni	ni	ni	ni	ni	ni	ni	ni	ni
RN_002315	no	ni	ni	ni	ni	ni	ni	ni	ni	ni
RN_002316	yes	ni	ni	ni	ni	ni	ni	ni	ni	ni
RN_002317	no	REFNigelle_002317.p1	AT1G62930.1	2.54e-119	Pentatricopeptide repeat-containing protein At1g62930, chloroplastic [Source:UniProtKB/Swiss-Prot;Acc:Q9LQ14]	REFNigelle_002317.p1	Aqcoe7G038000.1.p	5e-131	AT1G62930.1	Tetratricopeptide repeat (TPR)-like superfamily protein
RN_002318	no	ni	ni	ni	ni	ni	ni	ni	ni	ni
RN_002319	no	REFNigelle_002319.p1	AT4G13750.1	0	NOV description:Histidine kinase-, DNA gyrase B-, and HSP90-like ATPase family protein [Source:F4JTS8]	REFNigelle_002319.p1	Aqcoe2G412900.1.p	0	AT4G13750.1	Histidine kinase-, DNA gyrase B-, and HSP90-like ATPase family protein
RN_002320	no	REFNigelle_002320.p1	AT3G48520.1	1.52e-109	CYP94B3 description:CYP94B3 [Source:A0A178V8H3]	REFNigelle_002320.p1	Aqcoe5G035400.1.p	0	AT3G48520.1	cytochrome P450, family 94, subfamily B, polypeptide 3
RN_002321	no	ni	ni	ni	ni	ni	ni	ni	ni	ni
RN_002322	no	REFNigelle_002322.p1	AT3G24255.4	3.43e-36	RNA-directed DNA polymerase (Reverse transcriptase)-related family protein [Source:UniProtKB/TrEMBL;Acc:A0A1I9LSY4]	REFNigelle_002322.p1	Aqcoe7G048600.1.p	4e-27	ATMG00310.1	RNA-directed DNA polymerase (reverse transcriptase)-related family protein
RN_002323	no	ni	ni	ni	ni	ni	ni	ni	ni	ni
RN_002324	no	ni	ni	ni	ni	ni	ni	ni	ni	ni
RN_002325	no	ni	ni	ni	ni	ni	ni	ni	ni	ni
RN_002326	no	REFNigelle_002326.p1	AT5G18880.1	2.15e-10	RNA-directed DNA polymerase (Reverse transcriptase)-related family protein [Source:UniProtKB/TrEMBL;Acc:Q3E9D7]	REFNigelle_002326.p1	Aqcoe3G174500.1.p	7e-19	AT3G09510.1	Ribonuclease H-like superfamily protein
RN_002327	no	ni	ni	ni	ni	ni	ni	ni	ni	ni
RN_002328	no	ni	ni	ni	ni	ni	ni	ni	ni	ni
RN_002329	no	ni	ni	ni	ni	ni	ni	ni	ni	ni
RN_002331	yes	ni	ni	ni	ni	ni	ni	ni	ni	ni
RN_002332	no	ni	ni	ni	ni	ni	ni	ni	ni	ni
RN_002333	no	REFNigelle_002333.p1	AT4G23160.2	4.17e-146	CRK8 description:cysteine-rich RLK (RECEPTOR-like protein kinase) 8 [Source:AT4G23160]	ni	ni	ni	ni	ni
RN_002334	no	REFNigelle_002334.p1	AT3G21250.5	5.44e-16	MRP6 description:Multidrug resistance-associated protein 6 [Source:A0A1I9LPV5]	REFNigelle_002334.p1	Aqcoe7G413600.1.p	4e-39	AT3G21250.2	multidrug resistance-associated protein 6
RN_002335	yes	REFNigelle_002335.p1	AT3G21250.5	0	MRP6 description:Multidrug resistance-associated protein 6 [Source:A0A1I9LPV5]	REFNigelle_002335.p1	Aqcoe7G413500.2.p	0	AT3G21250.2	multidrug resistance-associated protein 6
RN_002336	no	REFNigelle_002336.p2	AT2G27120.1	4.76e-11	POL2B description:DNA polymerase epsilon catalytic subunit [Source:AT2G27120]	REFNigelle_002336.p2	Aqcoe2G131900.2.p	4e-12	AT1G08260.1	DNA polymerase epsilon catalytic subunit
RN_002337	no	ni	ni	ni	ni	ni	ni	ni	ni	ni
RN_002338	no	REFNigelle_002338.p1	AT3G44713.1	1.29e-05	unknown protein; BEST Arabidopsis thaliana protein match is: unknown protein (TAIR:AT3G44713]	REFNigelle_002338.p1	Aqcoe6G169100.1.p	4e-33	0	0
RN_002339	no	ni	ni	ni	ni	ni	ni	ni	ni	ni
RN_002340	no	ni	ni	ni	ni	ni	ni	ni	ni	ni
RN_002341	no	ni	ni	ni	ni	ni	ni	ni	ni	ni
RN_002342	yes	ni	ni	ni	ni	ni	ni	ni	ni	ni
RN_002343	no	ni	ni	ni	ni	ni	ni	ni	ni	ni
RN_002344	no	ni	ni	ni	ni	ni	ni	ni	ni	ni
RN_002345	no	ni	ni	ni	ni	ni	ni	ni	ni	ni
RN_002346	no	ni	ni	ni	ni	ni	ni	ni	ni	ni
RN_002347	no	REFNigelle_002347.p1	AT3G24255.7	6.26e-18	RNA-directed DNA polymerase (Reverse transcriptase)-related family protein [Source:UniProtKB/TrEMBL;Acc:A0A1I9LSY4]	REFNigelle_002347.p1	Aqcoe6G254800.1.p	2e-13	AT1G43760.1	DNAse I-like superfamily protein
RN_002348	no	ni	ni	ni	ni	ni	ni	ni	ni	ni
RN_002349	no	ni	ni	ni	ni	ni	ni	ni	ni	ni
RN_002350	no	REFNigelle_002350.p1	AT4G28610.1	5.99e-76	PHR1 description:Protein PHOSPHATE STARVATION RESPONSE 1 [Source:Q94CL7]	REFNigelle_002350.p1	Aqcoe2G381900.2.p	3e-180	AT4G28610.1	phosphate starvation response 1
RN_002351	no	REFNigelle_002351.p1	AT2G21210.1	8.65e-35	SAUR-like auxin-responsive protein family [Source:TAIR;Acc:AT2G21210]	REFNigelle_002351.p1	Aqcoe5G229800.1.p	5e-57	AT2G21210.1	SAUR-like auxin-responsive protein family
RN_002352	no	REFNigelle_002352.p1	AT3G55080.4	1.8e-66	At3g55080 [Source:UniProtKB/TrEMBL;Acc:Q5PP40]	REFNigelle_002352.p1	Aqcoe5G229300.3.p	2e-105	AT3G55080.1	SET domain-containing protein
RN_002353	no	ni	ni	ni	ni	ni	ni	ni	ni	ni
RN_002354	no	REFNigelle_002354.p1	AT4G27190.1	3.15e-90	Disease resistance protein At4g27190 [Source:UniProtKB/Swiss-Prot;Acc:Q9T048]	REFNigelle_002354.p1	Aqcoe5G430700.1.p	0	AT4G27220.1	NB-ARC domain-containing disease resistance protein
RN_002355	no	REFNigelle_002355.p1	AT3G24255.4	1.35e-39	RNA-directed DNA polymerase (Reverse transcriptase)-related family protein [Source:UniProtKB/TrEMBL;Acc:A0A1I9LSY4]	REFNigelle_002355.p1	Aqcoe1G270300.1.p	3e-36	AT1G43760.1	DNAse I-like superfamily protein
RN_002356	no	REFNigelle_002356.p1	AT3G02130.2	0	RPK2 description:LRR receptor-like serine/threonine-protein kinase RPK2 [Source:Q9S7I6]	REFNigelle_002356.p1	Aqcoe5G331200.1.p	0	AT3G02130.1	receptor-like protein kinase 2
RN_002357	no	ni	ni	ni	ni	ni	ni	ni	ni	ni
RN_002358	no	ni	ni	ni	ni	ni	ni	ni	ni	ni
RN_002360	no	ni	ni	ni	ni	ni	ni	ni	ni	ni
RN_002361	no	ni	ni	ni	ni	ni	ni	ni	ni	ni
RN_002363	no	ni	ni	ni	ni	ni	ni	ni	ni	ni
RN_002364	no	ni	ni	ni	ni	ni	ni	ni	ni	ni
RN_002365	no	REFNigelle_002365.p1	AT3G24560.2	2.91e-34	RSY3 description:Adenine nucleotide alpha hydrolases-like superfamily protein [Source:F4J7P7]	REFNigelle_002365.p1	Aqcoe7G404700.1.p	1e-51	AT3G24560.2	Adenine nucleotide alpha hydrolases-like superfamily protein
RN_002366	no	REFNigelle_002366.p1	AT3G20330.1	0	PYRB description:Aspartate carbamoyltransferase, chloroplastic [Source:P49077]	REFNigelle_002366.p1	Aqcoe2G106500.1.p	0	AT3G20330.1	PYRIMIDINE B
RN_002367	no	ni	ni	ni	ni	REFNigelle_002367.p2	Aqcoe7G292400.1.p	1e-22	AT1G43760.1	DNAse I-like superfamily protein
RN_002369	no	ni	ni	ni	ni	ni	ni	ni	ni	ni
RN_002370	no	REFNigelle_002370.p1	AT3G44713.1	1.2e-05	unknown protein; BEST Arabidopsis thaliana protein match is: unknown protein (TAIR:AT3G44713]	REFNigelle_002370.p1	Aqcoe6G169100.1.p	9e-33	0	0
RN_002371	no	ni	ni	ni	ni	REFNigelle_002371.p1	Aqcoe3G118700.1.p	4e-13	AT1G70370.2	polygalacturonase 2
RN_002372	no	ni	ni	ni	ni	ni	ni	ni	ni	ni
RN_002374	no	ni	ni	ni	ni	ni	ni	ni	ni	ni
RN_002375	no	ni	ni	ni	ni	ni	ni	ni	ni	ni
RN_002376	no	ni	ni	ni	ni	ni	ni	ni	ni	ni
RN_002377	no	ni	ni	ni	ni	ni	ni	ni	ni	ni
RN_002378	no	ni	ni	ni	ni	ni	ni	ni	ni	ni
RN_002379	yes	ni	ni	ni	ni	ni	ni	ni	ni	ni
RN_002380	no	ni	ni	ni	ni	ni	ni	ni	ni	ni
RN_002381	no	ni	ni	ni	ni	ni	ni	ni	ni	ni
RN_002382	no	ni	ni	ni	ni	ni	ni	ni	ni	ni
RN_002383	no	REFNigelle_002383.p1	AT5G24010.1	0	Probable receptor-like protein kinase At5g24010 [Source:UniProtKB/Swiss-Prot;Acc:Q9FLW0]	REFNigelle_002383.p1	Aqcoe7G025500.1.p	0	AT5G24010.1	Protein kinase superfamily protein
RN_002384	no	ni	ni	ni	ni	REFNigelle_002384.p1	Aqcoe2G172800.1.p	6e-06	0	0
RN_002385	no	ni	ni	ni	ni	ni	ni	ni	ni	ni
RN_002386	no	ni	ni	ni	ni	REFNigelle_002386.p2	Aqcoe1G434000.1.p	3e-10	AT2G26160.1	F-box family protein with a domain of unknown function (DUF295)
RN_002388	no	ni	ni	ni	ni	ni	ni	ni	ni	ni
RN_002389	no	ni	ni	ni	ni	ni	ni	ni	ni	ni
RN_002390	yes	ni	ni	ni	ni	REFNigelle_002390.p2	Aqcoe2G128200.1.p	3e-27	0	0
RN_002391	no	ni	ni	ni	ni	ni	ni	ni	ni	ni
RN_002392	no	ni	ni	ni	ni	ni	ni	ni	ni	ni
RN_002393	no	REFNigelle_002393.p1	AT3G13080.1	0	ABCC3 description:MRP3 [Source:A0A178VHA7]	REFNigelle_002393.p1	Aqcoe4G313400.1.p	0	AT3G13080.1	multidrug resistance-associated protein 3
RN_002394	no	ni	ni	ni	ni	ni	ni	ni	ni	ni
RN_002395	no	REFNigelle_002395.p1	AT3G14840.2	0	LRR-RLK description:Probable leucine-rich repeat receptor-like serine/threonine-protein kinase At3g14840 [Source:C0LGN2]	REFNigelle_002395.p1	Aqcoe4G025700.1.p	0	AT3G14840.2	Leucine-rich repeat transmembrane protein kinase
RN_002396	no	ni	ni	ni	ni	ni	ni	ni	ni	ni
RN_002397	no	REFNigelle_002397.p1	AT5G20940.1	2.74e-14	Beta-glucosidase-like protein [Source:UniProtKB/TrEMBL;Acc:Q8RWM4]	REFNigelle_002397.p1	Aqcoe1G069100.1.p	3e-15	AT5G20950.1	Glycosyl hydrolase family protein
RN_002399	yes	ni	ni	ni	ni	ni	ni	ni	ni	ni
RN_002400	no	ni	ni	ni	ni	ni	ni	ni	ni	ni
RN_002401	no	ni	ni	ni	ni	ni	ni	ni	ni	ni
RN_002402	no	REFNigelle_002402.p1	AT4G04650.1	0.000227	AT4g04650 protein [Source:UniProtKB/TrEMBL;Acc:Q9S9V5]	REFNigelle_002402.p1	Aqcoe3G131700.1.p	7e-10	AT1G60720.1	RNA-directed DNA polymerase (reverse transcriptase)-related family protein
RN_002403	no	REFNigelle_002403.p1	AT1G47350.1	0.000825	F-box associated ubiquitination effector family protein [Source:UniProtKB/TrEMBL;Acc:F4HT76]	REFNigelle_002403.p1	Aqcoe2G172800.1.p	8e-17	0	0
RN_002404	no	ni	ni	ni	ni	ni	ni	ni	ni	ni
RN_002405	no	ni	ni	ni	ni	ni	ni	ni	ni	ni
RN_002406	no	ni	ni	ni	ni	ni	ni	ni	ni	ni
RN_002407	no	ni	ni	ni	ni	ni	ni	ni	ni	ni
RN_002408	no	ni	ni	ni	ni	REFNigelle_002408.p1	Aqcoe5G398100.1.p	1e-06	0	0
RN_002409	no	ni	ni	ni	ni	ni	ni	ni	ni	ni
RN_002410	yes	ni	ni	ni	ni	ni	ni	ni	ni	ni
RN_002412	no	ni	ni	ni	ni	ni	ni	ni	ni	ni
RN_002413	no	ni	ni	ni	ni	ni	ni	ni	ni	ni
RN_002414	yes	ni	ni	ni	ni	REFNigelle_002414.p3	Aqcoe2G128200.1.p	2e-06	0	0
RN_002415	no	ni	ni	ni	ni	ni	ni	ni	ni	ni
RN_002416	no	ni	ni	ni	ni	ni	ni	ni	ni	ni
RN_002417	no	ni	ni	ni	ni	ni	ni	ni	ni	ni
RN_002418	no	REFNigelle_002418.p1	AT4G23160.2	4.04e-97	CRK8 description:cysteine-rich RLK (RECEPTOR-like protein kinase) 8 [Source:AT4G23160]	REFNigelle_002418.p2	Aqcoe3G118700.1.p	5e-07	AT1G70370.2	polygalacturonase 2
RN_002419	yes	ni	ni	ni	ni	ni	ni	ni	ni	ni
RN_002420	no	ni	ni	ni	ni	ni	ni	ni	ni	ni
RN_002421	no	ni	ni	ni	ni	ni	ni	ni	ni	ni
RN_002422	no	ni	ni	ni	ni	ni	ni	ni	ni	ni
RN_002423	no	ni	ni	ni	ni	ni	ni	ni	ni	ni
RN_002424	no	REFNigelle_002424.p1	AT5G07400.1	2.92e-173	At5g07400 [Source:UniProtKB/TrEMBL;Acc:Q84MA4]	REFNigelle_002424.p1	Aqcoe5G318500.1.p	0	AT5G07400.1	forkhead-associated domain-containing protein / FHA domain-containing protein
RN_002425	no	REFNigelle_002425.p1	AT5G07400.8	8.48e-36	At5g07400 [Source:UniProtKB/TrEMBL;Acc:Q84MA4]	REFNigelle_002425.p2	Aqcoe5G318500.3.p	0	AT5G07400.1	forkhead-associated domain-containing protein / FHA domain-containing protein
RN_002426	no	REFNigelle_002426.p1	AT5G38840.1	0	Kanadaptin-like protein [Source:UniProtKB/TrEMBL;Acc:Q0WW94]	REFNigelle_002426.p1	Aqcoe3G380800.1.p	0	AT5G38840.1	SMAD/FHA domain-containing protein
RN_002427	no	REFNigelle_002427.p1	AT4G04650.1	1.7e-13	AT4g04650 protein [Source:UniProtKB/TrEMBL;Acc:Q9S9V5]	REFNigelle_002427.p1	Aqcoe3G131700.1.p	4e-21	AT1G60720.1	RNA-directed DNA polymerase (reverse transcriptase)-related family protein
RN_002428	no	ni	ni	ni	ni	REFNigelle_002428.p1	Aqcoe1G370900.1.p	5e-09	0	0
RN_002429	no	ni	ni	ni	ni	ni	ni	ni	ni	ni
RN_002430	no	REFNigelle_002430.p1	AT3G24255.4	2.91e-38	RNA-directed DNA polymerase (Reverse transcriptase)-related family protein [Source:UniProtKB/TrEMBL;Acc:A0A1I9LSY4]	REFNigelle_002430.p1	Aqcoe3G174500.1.p	1e-20	AT3G09510.1	Ribonuclease H-like superfamily protein
RN_002431	yes	ni	ni	ni	ni	ni	ni	ni	ni	ni
RN_002432	yes	ni	ni	ni	ni	ni	ni	ni	ni	ni
RN_002433	yes	REFNigelle_002433.p1	AT3G14840.2	6.11e-156	LRR-RLK description:Probable leucine-rich repeat receptor-like serine/threonine-protein kinase At3g14840 [Source:C0LGN2]	REFNigelle_002433.p1	Aqcoe4G026000.1.p	0	AT3G14840.2	Leucine-rich repeat transmembrane protein kinase
RN_002434	yes	ni	ni	ni	ni	ni	ni	ni	ni	ni
RN_002435	no	REFNigelle_002435.p1	AT1G62620.1	4.23e-43	Flavin-containing monooxygenase FMO GS-OX-like 3 [Source:UniProtKB/Swiss-Prot;Acc:Q9SXD5]	REFNigelle_002435.p2	Aqcoe7G079700.1.p	2e-66	AT1G63370.1	Flavin-binding monooxygenase family protein
RN_002436	no	REFNigelle_002436.p1	AT1G50300.1	4.95e-138	TAF15 description:Transcription initiation factor TFIID subunit 15 [Source:Q9AST1]	REFNigelle_002436.p1	Aqcoe3G437800.1.p	3e-163	AT1G50300.1	TBP-associated factor 15
RN_002437	no	REFNigelle_002437.p2	AT3G24255.7	1.46e-24	RNA-directed DNA polymerase (Reverse transcriptase)-related family protein [Source:UniProtKB/TrEMBL;Acc:A0A1I9LSY4]	REFNigelle_002437.p3	Aqcoe7G292400.1.p	7e-25	AT1G43760.1	DNAse I-like superfamily protein
RN_002438	no	REFNigelle_002438.p1	AT4G27610.8	1.22e-109	Intracellular protein transporter [Source:UniProtKB/TrEMBL;Acc:Q84JD6]	REFNigelle_002438.p1	Aqcoe1G287700.1.p	3e-160	AT4G27610.2	0
RN_002439	no	ni	ni	ni	ni	ni	ni	ni	ni	ni
RN_002440	no	ni	ni	ni	ni	ni	ni	ni	ni	ni
RN_002444	no	REFNigelle_002444.p1	AT5G56310.1	7.13e-102	PCMP-E13 description:Pentatricopeptide repeat-containing protein At5g56310 [Source:Q9FMA1]	REFNigelle_002444.p1	Aqcoe1G186700.1.p	7e-175	AT5G48910.1	Pentatricopeptide repeat (PPR) superfamily protein
RN_002445	no	REFNigelle_002445.p1	AT3G63390.1	5.55e-11	At3g63390 [Source:UniProtKB/TrEMBL;Acc:Q1H5D6]	REFNigelle_002445.p1	Aqcoe7G441100.1.p	5e-41	AT3G63390.1	0
RN_002446	no	REFNigelle_002446.p1	AT5G15740.1	2.42e-148	OFUT34 description:O-fucosyltransferase 34 [Source:Q4V398]	REFNigelle_002446.p1	Aqcoe3G068000.2.p	1e-163	AT5G15740.1	O-fucosyltransferase family protein
RN_002447	no	ni	ni	ni	ni	ni	ni	ni	ni	ni
RN_002448	no	ni	ni	ni	ni	ni	ni	ni	ni	ni
RN_002449	yes	ni	ni	ni	ni	ni	ni	ni	ni	ni
RN_002452	no	REFNigelle_002452.p1	AT5G13700.1	9.75e-155	PAO1 description:Polyamine oxidase 1 [Source:Q9FNA2]	REFNigelle_002452.p1	Aqcoe3G119000.1.p	0	AT5G13700.1	polyamine oxidase 1
RN_002453	no	REFNigelle_002453.p1	AT3G57520.1	0	RFS2 description:Probable galactinol--sucrose galactosyltransferase 2 [Source:Q94A08]	REFNigelle_002453.p1	Aqcoe2G020700.3.p	0	AT3G57520.1	seed imbibition 2
RN_002455	no	ni	ni	ni	ni	ni	ni	ni	ni	ni
RN_002456	no	REFNigelle_002456.p1	AT2G20940.2	1.29e-49	At2g20940 [Source:UniProtKB/TrEMBL;Acc:Q9SKR7]	REFNigelle_002456.p1	Aqcoe7G183200.2.p	7e-60	AT2G20940.1	Protein of unknown function (DUF1279)
RN_002457	no	REFNigelle_002457.p1	AT1G69550.1	2.42e-21	Disease resistance protein (TIR-NBS-LRR class) [Source:UniProtKB/TrEMBL;Acc:F4I270]	REFNigelle_002457.p1	Aqcoe6G185400.2.p	3e-100	AT3G14460.1	LRR and NB-ARC domains-containing disease resistance protein
RN_002458	no	ni	ni	ni	ni	ni	ni	ni	ni	ni
RN_002459	no	REFNigelle_002459.p1	AT2G35120.1	1.18e-83	GDH2 description:Glycine cleavage system H protein 2, mitochondrial [Source:O82179]	REFNigelle_002459.p1	Aqcoe1G166700.1.p	4e-89	AT2G35120.1	Single hybrid motif superfamily protein
RN_002460	no	REFNigelle_002460.p3	AT5G62530.1	3.11e-84	ALDH12A1 description:Delta-1-pyrroline-5-carboxylate dehydrogenase 12A1, mitochondrial [Source:Q8VZC3]	REFNigelle_002460.p3	Aqcoe3G329000.1.p	1e-95	AT5G62530.1	aldehyde dehydrogenase 12A1
RN_002461	no	ni	ni	ni	ni	ni	ni	ni	ni	ni
RN_002462	no	REFNigelle_002462.p1	ATMG00860.1	1.01e-28	ORF158 description:Uncharacterized mitochondrial protein AtMg00860 [Source:P92523]	REFNigelle_002462.p1	Aqcoe6G275700.1.p	6e-23	0	0
RN_002463	no	REFNigelle_002463.p1	AT1G43260.1	1.33e-101	HAT transposon superfamily protein [Source:UniProtKB/TrEMBL;Acc:F4IB51]	REFNigelle_002463.p1	Aqcoe7G073800.1.p	7e-83	AT4G12300.1	cytochrome P450, family 706, subfamily A, polypeptide 4
RN_002464	yes	REFNigelle_002464.p1	ATMG00860.1	2.27e-33	ORF158 description:Uncharacterized mitochondrial protein AtMg00860 [Source:P92523]	REFNigelle_002464.p1	Aqcoe7G257100.1.p	8e-09	ATMG00860.1	DNA/RNA polymerases superfamily protein
RN_002465	no	REFNigelle_002465.p1	AT3G42170.2	1.46e-84	HAT description:DAYSLEEPER [Source:A0A178VJS5]	REFNigelle_002465.p1	Aqcoe3G393700.1.p	1e-32	AT1G18560.1	BED zinc finger ;hAT family dimerisation domain
RN_002466	yes	ni	ni	ni	ni	ni	ni	ni	ni	ni
RN_002467	no	ni	ni	ni	ni	ni	ni	ni	ni	ni
RN_002468	no	REFNigelle_002468.p2	AT3G24255.3	1.83e-12	RNA-directed DNA polymerase (Reverse transcriptase)-related family protein [Source:UniProtKB/TrEMBL;Acc:A0A1I9LSY4]	REFNigelle_002468.p2	Aqcoe6G207800.1.p	3e-11	ATMG00310.1	RNA-directed DNA polymerase (reverse transcriptase)-related family protein
RN_002469	no	ni	ni	ni	ni	ni	ni	ni	ni	ni
RN_002470	no	ni	ni	ni	ni	ni	ni	ni	ni	ni
RN_002471	no	REFNigelle_002471.p2	AT3G24255.7	9.53e-26	RNA-directed DNA polymerase (Reverse transcriptase)-related family protein [Source:UniProtKB/TrEMBL;Acc:A0A1I9LSY4]	REFNigelle_002471.p3	Aqcoe4G180100.1.p	1e-19	AT1G43760.1	DNAse I-like superfamily protein
RN_002472	no	REFNigelle_002472.p1	AT2G04865.2	7.51e-37	Protein MAIN-LIKE 2 [Source:UniProtKB/Swiss-Prot;Acc:F4IFD0]	REFNigelle_002472.p1	Aqcoe4G125000.1.p	1e-08	AT4G16050.1	Aminotransferase-like, plant mobile domain family protein
RN_002473	no	ni	ni	ni	ni	ni	ni	ni	ni	ni
RN_002474	no	REFNigelle_002474.p1	AT3G14840.2	0	LRR-RLK description:Probable leucine-rich repeat receptor-like serine/threonine-protein kinase At3g14840 [Source:C0LGN2]	REFNigelle_002474.p1	Aqcoe4G025700.1.p	0	AT3G14840.2	Leucine-rich repeat transmembrane protein kinase
RN_002475	no	REFNigelle_002475.p1	AT1G62930.1	3.79e-134	Pentatricopeptide repeat-containing protein At1g62930, chloroplastic [Source:UniProtKB/Swiss-Prot;Acc:Q9LQ14]	REFNigelle_002475.p1	Aqcoe2G110300.1.p	0	AT1G12775.1	Pentatricopeptide repeat (PPR) superfamily protein
RN_002476	no	REFNigelle_002476.p1	AT5G60740.1	0	ABCG28 description:ABC transporter G family member 28 [Source:Q9FF46]	REFNigelle_002476.p1	Aqcoe1G137500.1.p	0	AT2G37010.1	non-intrinsic ABC protein 12
RN_002477	no	REFNigelle_002477.p1	AT2G39940.1	0	COI1 description:Coronatine-insensitive protein 1 [Source:O04197]	REFNigelle_002477.p1	Aqcoe1G431700.3.p	0	AT2G39940.1	RNI-like superfamily protein
RN_002479	yes	REFNigelle_002479.p1	AT3G58180.1	1.82e-166	Deoxyhypusine hydroxylase [Source:UniProtKB/Swiss-Prot;Acc:Q94JW0]	REFNigelle_002479.p1	Aqcoe5G032400.1.p	1e-180	AT3G58180.1	ARM repeat superfamily protein
RN_002480	no	REFNigelle_002480.p1	AT3G25100.1	0	CDC45 description:CDC45 (Cell division cycle 45)-like protein [Source:Q9LSG6]	REFNigelle_002480.p1	Aqcoe1G011700.1.p	0	AT3G25100.1	cell division cycle 45
RN_002481	no	REFNigelle_002481.p1	AT1G17520.3	1.41e-31	Homeodomain-like/winged-helix DNA-binding family protein [Source:TAIR;Acc:AT1G17520]	REFNigelle_002481.p2	Aqcoe7G122900.1.p	1e-53	AT1G17520.1	Homeodomain-like/winged-helix DNA-binding family protein
RN_002487	no	REFNigelle_002487.p1	AT1G47840.1	0	HXK3 description:Hexokinase-like 1 protein [Source:Q9FZG4]	REFNigelle_002487.p1	Aqcoe5G208800.1.p	0	AT1G47840.1	hexokinase 3
RN_002489	no	ni	ni	ni	ni	ni	ni	ni	ni	ni
RN_002492	no	ni	ni	ni	ni	ni	ni	ni	ni	ni
RN_002493	no	ni	ni	ni	ni	ni	ni	ni	ni	ni
RN_002494	no	ni	ni	ni	ni	ni	ni	ni	ni	ni
RN_002498	no	REFNigelle_002498.p1	AT5G16620.1	8.07e-128	TIC40 description:TIC40 [Source:A0A178UEV6]	REFNigelle_002498.p1	Aqcoe2G222900.1.p	6e-178	AT5G16620.1	hydroxyproline-rich glycoprotein family protein
RN_002503	no	REFNigelle_002503.p1	AT3G06240.1	1.05e-11	F-box/kelch-repeat protein At3g06240 [Source:UniProtKB/Swiss-Prot;Acc:Q8GXC7]	REFNigelle_002503.p1	Aqcoe1G497800.1.p	1e-38	AT3G23880.1	F-box and associated interaction domains-containing protein
RN_002504	no	REFNigelle_002504.p1	AT1G09980.3	0	Putative serine esterase family protein [Source:UniProtKB/TrEMBL;Acc:Q8RXV4]	REFNigelle_002504.p1	Aqcoe6G040100.2.p	0	AT1G58350.1	Putative serine esterase family protein
RN_002507	no	REFNigelle_002507.p1	AT3G60500.4	0.000131	RRP45B description:Exosome complex component RRP45B [Source:Q9M209]	REFNigelle_002507.p1	Aqcoe6G195200.1.p	2e-06	AT1G40087.1	Plant transposase (Ptta/En/Spm family)
RN_002508	no	REFNigelle_002508.p1	AT4G34210.1	1.57e-49	ASK11 description:SKP1-like protein 11 [Source:O49484]	REFNigelle_002508.p1	Aqcoe5G065700.1.p	5e-54	AT1G75950.1	S phase kinase-associated protein 1
RN_002510	no	ni	ni	ni	ni	ni	ni	ni	ni	ni
RN_002513	no	ni	ni	ni	ni	ni	ni	ni	ni	ni
RN_002516	no	ni	ni	ni	ni	ni	ni	ni	ni	ni
RN_002518	no	REFNigelle_002518.p1	AT3G14690.1	0	CYP72A15 description:Cytochrome P450, family 72, subfamily A, polypeptide 15 [Source:A0A1I9LLM3]	REFNigelle_002518.p1	Aqcoe4G140000.1.p	0	AT3G14690.1	cytochrome P450, family 72, subfamily A, polypeptide 15
RN_002519	no	ni	ni	ni	ni	ni	ni	ni	ni	ni
RN_002521	yes	ni	ni	ni	ni	ni	ni	ni	ni	ni
RN_002523	no	ni	ni	ni	ni	ni	ni	ni	ni	ni
RN_002525	no	REFNigelle_002525.p1	AT1G02410.3	8.14e-112	COX11 description:Cytochrome c oxidase assembly protein COX11, mitochondrial [Source:Q8GWR0]	REFNigelle_002525.p1	Aqcoe3G406400.1.p	4e-144	AT1G02410.1	cytochrome c oxidase assembly protein CtaG / Cox11 family
RN_002526	no	REFNigelle_002526.p1	AT1G56700.1	2.64e-113	At1g56700 [Source:UniProtKB/TrEMBL;Acc:Q9FXC0]	REFNigelle_002526.p1	Aqcoe5G297500.2.p	6e-147	AT1G56700.1	Peptidase C15, pyroglutamyl peptidase I-like
RN_002527	no	ni	ni	ni	ni	ni	ni	ni	ni	ni
RN_002529	no	ni	ni	ni	ni	ni	ni	ni	ni	ni
RN_002533	no	REFNigelle_002533.p1	AT2G20210.1	7.57e-148	RNI-like superfamily protein [Source:UniProtKB/TrEMBL;Acc:F4IUG1]	REFNigelle_002533.p1	Aqcoe5G005400.1.p	0	AT2G20210.1	RNI-like superfamily protein
RN_002536	no	REFNigelle_002536.p1	AT4G12560.1	1.51e-31	CPR1 description:F-box protein CPR1 [Source:Q9SU30]	REFNigelle_002536.p1	Aqcoe1G435100.1.p	1e-67	AT3G06240.1	F-box family protein
RN_002537	no	REFNigelle_002537.p1	AT3G06240.1	1.4e-19	F-box/kelch-repeat protein At3g06240 [Source:UniProtKB/Swiss-Prot;Acc:Q8GXC7]	REFNigelle_002537.p1	Aqcoe5G455700.1.p	4e-46	AT3G07870.1	F-box and associated interaction domains-containing protein
RN_002538	no	REFNigelle_002538.p1	AT2G34960.1	0	CAT5 description:CAT5 [Source:A0A178VPZ9]	REFNigelle_002538.p1	Aqcoe4G038600.2.p	0	AT2G34960.1	cationic amino acid transporter 5
RN_002539	no	ni	ni	ni	ni	ni	ni	ni	ni	ni
RN_002540	no	REFNigelle_002540.p1	AT3G55490.1	1.12e-90	At1g19080 [Source:UniProtKB/TrEMBL;Acc:Q6NNH6]	REFNigelle_002540.p1	Aqcoe5G286100.2.p	8e-116	AT1G19080.1	GINS complex protein
RN_002541	no	ni	ni	ni	ni	ni	ni	ni	ni	ni
RN_002542	no	REFNigelle_002542.p2	AT5G58470.1	5.72e-12	TAF15B description:Transcription initiation factor TFIID subunit 15b [Source:Q94KD0]	REFNigelle_002542.p2	Aqcoe1G151700.2.p	1e-07	AT5G58470.2	TBP-associated factor 15B
RN_002543	no	ni	ni	ni	ni	ni	ni	ni	ni	ni
RN_002544	no	ni	ni	ni	ni	ni	ni	ni	ni	ni
RN_002545	no	ni	ni	ni	ni	ni	ni	ni	ni	ni
RN_002546	no	ni	ni	ni	ni	REFNigelle_002546.p1	Aqcoe7G382100.2.p	0	0	0
RN_002547	no	REFNigelle_002547.p1	AT3G49430.2	2.33e-71	SR34A description:Serine/arginine-rich splicing factor SR34A [Source:A2RVS6]	REFNigelle_002547.p1	Aqcoe5G470700.1.p	2e-67	AT3G49430.2	SER/ARG-rich protein 34A
RN_002548	no	REFNigelle_002548.p1	AT3G49430.2	2.33e-71	SR34A description:Serine/arginine-rich splicing factor SR34A [Source:A2RVS6]	REFNigelle_002548.p1	Aqcoe5G470700.1.p	2e-67	AT3G49430.2	SER/ARG-rich protein 34A
RN_002549	no	ni	ni	ni	ni	ni	ni	ni	ni	ni
RN_002550	no	ni	ni	ni	ni	ni	ni	ni	ni	ni
RN_002551	no	REFNigelle_002551.p1	AT1G55200.2	5.69e-165	Kinase with adenine nucleotide alpha hydrolases-like domain-containing protein [Source:UniProtKB/TrEMBL;Acc:Q9C890]	REFNigelle_002551.p1	Aqcoe2G400200.4.p	0	AT3G13690.1	Protein kinase protein with adenine nucleotide alpha hydrolases-like domain
RN_002552	no	ni	ni	ni	ni	ni	ni	ni	ni	ni
RN_002553	no	ni	ni	ni	ni	ni	ni	ni	ni	ni
RN_002554	no	REFNigelle_002554.p1	AT5G67080.1	2.78e-74	MAPKKK19 description:Mitogen-activated protein kinase kinase kinase 19 [Source:Q9FHA5]	REFNigelle_002554.p1	Aqcoe1G247600.1.p	8e-97	AT3G50310.1	mitogen-activated protein kinase kinase kinase 20
RN_002557	no	REFNigelle_002557.p1	AT1G67120.1	0	MDN1 description:ATPases;nucleotide binding;ATP binding;nucleoside-triphosphatases;transcription factor binding [Source:AT1G67120]	REFNigelle_002557.p1	Aqcoe7G421400.1.p	0	AT1G67120.1	ATPases;nucleotide binding;ATP binding;nucleoside-triphosphatases;transcription factor binding
[truncated: 32,617 more rows]

## Sheet: TableS3
Characteristics and annotation of 1620 Morph DEG
LFC negative value=more expressed in P than in T; |LFC-M| values of both stages are in red when |LFC-M|>1 in at least one stage.				BlastP e-3 (TAIRV10)				BlastP e-3 Aquilegia (Phytozome 322-v3.1)
DEG_Id	LFC-M_st1	LFC-M_st2	CorP(AP33)>0,8_FDR<0,26	qseqid	ssqid	evalue	description	query_peptide	subject	evalue	Best-hit-arabi-name	arabi-defline
RN_000007	0.0153846961164316	-0.410938832065515	-	REFNigelle_000007.p1	AT5G20620.1	0	UBQ4 description:Polyubiquitin 4 [Source:P0CH32]	REFNigelle_000007.p1	Aqcoe1G364300.3.p	0	AT4G05320.4	polyubiquitin 10
RN_000028	0.257332089564841	0.584346429378231	-	#N/A	#N/A	#N/A	#N/A	#N/A	#N/A	#N/A	#N/A	#N/A
RN_000040	1.12900374310883	1.84390571854444	-	#N/A	#N/A	#N/A	#N/A	#N/A	#N/A	#N/A	#N/A	#N/A
RN_000051	0.495023351936977	0.636022840438989	-	#N/A	#N/A	#N/A	#N/A	#N/A	#N/A	#N/A	#N/A	#N/A
RN_000067	-0.0877995135856017	0.296105834585268	-	#N/A	#N/A	#N/A	#N/A	#N/A	#N/A	#N/A	#N/A	#N/A
RN_000137	-0.926532711635523	-1.36000909986837	-	REFNigelle_000137.p1	AT3G24255.3	2.73e-22	RNA-directed DNA polymerase (Reverse transcriptase)-related family protein [Source:UniProtKB/TrEMBL;Acc:A0A1I9LSY4]	REFNigelle_000137.p1	Aqcoe3G174500.1.p	3e-22	AT3G09510.1	Ribonuclease H-like superfamily protein
RN_000140	-1.64521545921504	-1.00907770108662	-	#N/A	#N/A	#N/A	#N/A	#N/A	#N/A	#N/A	#N/A	#N/A
RN_000155	0.733434622892405	0.126030753527559	-	REFNigelle_000155.p1	AT3G21250.6	3.01e-54	MRP6 description:Multidrug resistance-associated protein 6 [Source:A0A1I9LPV5]	REFNigelle_000155.p1	Aqcoe7G413500.2.p	3e-78	AT3G21250.2	multidrug resistance-associated protein 6
RN_000188	1.29841311436316	1.38979725183562	-	#N/A	#N/A	#N/A	#N/A	#N/A	#N/A	#N/A	#N/A	#N/A
RN_000192	0.0605851341982515	-1.17408284326918	-	#N/A	#N/A	#N/A	#N/A	#N/A	#N/A	#N/A	#N/A	#N/A
RN_000194	0.246039851278386	0.474749638454097	-	#N/A	#N/A	#N/A	#N/A	REFNigelle_000194.p1	Aqcoe2G436000.1.p	1e-10	AT1G65470.1	chromatin assembly factor-1 (FASCIATA1) (FAS1)
RN_000199	0.49724792021594	0.699443659129097	-	#N/A	#N/A	#N/A	#N/A	#N/A	#N/A	#N/A	#N/A	#N/A
RN_000208	-1.12363931478135	-1.8587403439913	-	#N/A	#N/A	#N/A	#N/A	#N/A	#N/A	#N/A	#N/A	#N/A
RN_000231	0.22042205897811	0.778859124750778	-	#N/A	#N/A	#N/A	#N/A	#N/A	#N/A	#N/A	#N/A	#N/A
RN_000234	0.476469247267805	0.34340226274046	-	#N/A	#N/A	#N/A	#N/A	#N/A	#N/A	#N/A	#N/A	#N/A
RN_000255	0.551378532834689	1.36642175007523	-	#N/A	#N/A	#N/A	#N/A	#N/A	#N/A	#N/A	#N/A	#N/A
RN_000284	0.500044069984326	0.628101775321609	-	#N/A	#N/A	#N/A	#N/A	#N/A	#N/A	#N/A	#N/A	#N/A
RN_000316	-0.51986010871986	-0.486323272609705	-	REFNigelle_000316.p1	AT1G27200.1	0	DUF23/GT0 (Fragment) [Source:UniProtKB/TrEMBL;Acc:I1VCA1]	REFNigelle_000316.p1	Aqcoe3G313700.1.p	0	AT1G27200.1	Domain of unknown function (DUF23)
RN_000325	-0.165184509481677	-1.11632302591776	-	#N/A	#N/A	#N/A	#N/A	#N/A	#N/A	#N/A	#N/A	#N/A
RN_000328	0.96659446143823	1.14819553749336	-	REFNigelle_000328.p1	AT3G04760.2	1.67e-125	Pentatricopeptide repeat-containing protein At3g04760, chloroplastic [Source:UniProtKB/Swiss-Prot;Acc:Q9SR00]	REFNigelle_000328.p1	Aqcoe5G023800.1.p	5e-142	AT3G04760.1	Pentatricopeptide repeat (PPR-like) superfamily protein
RN_000329	-1.91411125812286	-2.61102627086234	-	REFNigelle_000329.p1	AT3G04760.2	2.31e-125	Pentatricopeptide repeat-containing protein At3g04760, chloroplastic [Source:UniProtKB/Swiss-Prot;Acc:Q9SR00]	REFNigelle_000329.p1	Aqcoe5G023800.1.p	5e-142	AT3G04760.1	Pentatricopeptide repeat (PPR-like) superfamily protein
RN_000335	1.3787407558981	1.19067147753291	-	#N/A	#N/A	#N/A	#N/A	#N/A	#N/A	#N/A	#N/A	#N/A
RN_000339	0.573564750041386	0.44023281823956	-	#N/A	#N/A	#N/A	#N/A	#N/A	#N/A	#N/A	#N/A	#N/A
RN_000340	0.519693256210523	0.33512968988822	-	#N/A	#N/A	#N/A	#N/A	#N/A	#N/A	#N/A	#N/A	#N/A
RN_000352	-0.456260654387768	-0.424406875508911	-	#N/A	#N/A	#N/A	#N/A	#N/A	#N/A	#N/A	#N/A	#N/A
RN_000415	0.722922141115137	0.989565129112816	-	#N/A	#N/A	#N/A	#N/A	#N/A	#N/A	#N/A	#N/A	#N/A
RN_000440	1.4728785674149	1.52844232048826	-	#N/A	#N/A	#N/A	#N/A	#N/A	#N/A	#N/A	#N/A	#N/A
RN_000467	-0.5753872026368	-1.01764670684878	-	#N/A	#N/A	#N/A	#N/A	#N/A	#N/A	#N/A	#N/A	#N/A
RN_000496	0.835112517411295	0.649822020561581	-	#N/A	#N/A	#N/A	#N/A	#N/A	#N/A	#N/A	#N/A	#N/A
RN_000512	0.470720488303405	0.40691854720587	-	#N/A	#N/A	#N/A	#N/A	#N/A	#N/A	#N/A	#N/A	#N/A
RN_000522	0.82849431359332	0.953628659523119	-	#N/A	#N/A	#N/A	#N/A	#N/A	#N/A	#N/A	#N/A	#N/A
RN_000525	0.437726717351839	0.553879353915882	-	#N/A	#N/A	#N/A	#N/A	#N/A	#N/A	#N/A	#N/A	#N/A
RN_000526	0.587657812396382	0.420454159918036	-	#N/A	#N/A	#N/A	#N/A	#N/A	#N/A	#N/A	#N/A	#N/A
RN_000536	0.648376506397592	0.590954466190755	-	#N/A	#N/A	#N/A	#N/A	#N/A	#N/A	#N/A	#N/A	#N/A
RN_000539	0.763005243005623	0.749607115682622	-	REFNigelle_000539.p2	AT4G23160.2	1.62e-44	CRK8 description:cysteine-rich RLK (RECEPTOR-like protein kinase) 8 [Source:AT4G23160]	REFNigelle_000539.p3	Aqcoe1G345300.1.p	3e-13	AT1G21280.1	0
RN_000554	0.724571778297987	0.27928361035124	-	#N/A	#N/A	#N/A	#N/A	#N/A	#N/A	#N/A	#N/A	#N/A
RN_000558	-0.593597850458007	-1.24740266262171	-	REFNigelle_000558.p1	AT5G44230.1	0	PCMP-H17 description:Pentatricopeptide repeat-containing protein At5g44230 [Source:Q9FFG8]	REFNigelle_000558.p1	Aqcoe7G377600.1.p	0	AT5G44230.1	Pentatricopeptide repeat (PPR) superfamily protein
RN_000570	1.51149588837456	-0.0552275882702737	-	#N/A	#N/A	#N/A	#N/A	REFNigelle_000570.p1	Aqcoe5G398100.1.p	9e-07	0	0
RN_000581	0.953467216149641	0.386952587136645	-	REFNigelle_000581.p1	AT3G29390.2	4.34e-149	RIK description:Protein RIK [Source:Q9LIA4]	REFNigelle_000581.p1	Aqcoe3G343500.2.p	5e-99	AT3G29390.1	RS2-interacting KH protein
RN_000602	2.05045590043039	1.04609012993989	-	#N/A	#N/A	#N/A	#N/A	#N/A	#N/A	#N/A	#N/A	#N/A
RN_000639	0.783787264774684	1.11283797416594	-	REFNigelle_000639.p1	AT2G15010.1	1.88e-14	Probable thionin-2.3 [Source:UniProtKB/Swiss-Prot;Acc:Q8VZK8]	REFNigelle_000639.p1	Aqcoe4G072900.1.p	2e-27	AT1G66100.1	Plant thionin
RN_000651	0.609783939482361	0.934686027130185	-	REFNigelle_000651.p1	AT4G35630.1	2.22e-153	PSAT1 description:Phosphoserine aminotransferase 1, chloroplastic [Source:Q96255]	REFNigelle_000651.p1	Aqcoe1G063800.1.p	0	AT4G35630.1	phosphoserine aminotransferase
RN_000662	0.419055632559255	0.205950178816196	-	REFNigelle_000662.p1	AT5G19460.1	2.04e-108	NUDT20 description:Nudix hydrolase 20, chloroplastic [Source:Q8VXZ0]	REFNigelle_000662.p1	Aqcoe5G403300.1.p	1e-129	AT5G19460.1	nudix hydrolase homolog 20
RN_000671	0.351308112510848	0.644724268291999	-	#N/A	#N/A	#N/A	#N/A	#N/A	#N/A	#N/A	#N/A	#N/A
RN_000679	0.107010673282859	0.408705353030724	-	#N/A	#N/A	#N/A	#N/A	#N/A	#N/A	#N/A	#N/A	#N/A
RN_000689	0.413586858676719	0.611961778526122	-	#N/A	#N/A	#N/A	#N/A	#N/A	#N/A	#N/A	#N/A	#N/A
RN_000690	0.341149464751643	0.55009526738455	-	#N/A	#N/A	#N/A	#N/A	#N/A	#N/A	#N/A	#N/A	#N/A
RN_000693	0.129545097301994	-0.286185164396521	-	REFNigelle_000693.p1	AT1G07790.1	1.49e-70	HTB1 description:Histone H2B.1 [Source:Q9LQQ4]	REFNigelle_000693.p1	Aqcoe1G124200.1.p	4e-57	AT3G45980.1	Histone superfamily protein
RN_000696	0.828572745238936	1.44013037887018	-	#N/A	#N/A	#N/A	#N/A	#N/A	#N/A	#N/A	#N/A	#N/A
RN_000702	1.11661421883248	1.12759428121509	-	REFNigelle_000702.p1	AT1G53430.2	3.48e-92	Probable LRR receptor-like serine/threonine-protein kinase At1g53430 [Source:UniProtKB/Swiss-Prot;Acc:C0LGG8]	REFNigelle_000702.p1	Aqcoe4G025800.2.p	2e-105	AT1G07650.2	Leucine-rich repeat transmembrane protein kinase
RN_000703	3.01293574358352	2.62290473945212	-	REFNigelle_000703.p1	AT1G53430.2	7.5e-84	Probable LRR receptor-like serine/threonine-protein kinase At1g53430 [Source:UniProtKB/Swiss-Prot;Acc:C0LGG8]	REFNigelle_000703.p1	Aqcoe4G025800.2.p	6e-93	AT1G07650.2	Leucine-rich repeat transmembrane protein kinase
RN_000706	0.732912900171467	0.868962644484502	-	REFNigelle_000706.p1	AT1G07650.4	7.46e-135	Leucine-rich repeat transmembrane protein kinase [Source:UniProtKB/TrEMBL;Acc:F4HSE1]	REFNigelle_000706.p1	Aqcoe4G025800.2.p	2e-154	AT1G07650.2	Leucine-rich repeat transmembrane protein kinase
RN_000719	-1.72728491846622	-2.70261215704494	-	#N/A	#N/A	#N/A	#N/A	#N/A	#N/A	#N/A	#N/A	#N/A
RN_000746	1.01514461049975	1.7673286697994	-	#N/A	#N/A	#N/A	#N/A	#N/A	#N/A	#N/A	#N/A	#N/A
RN_000750	0.360738719969636	0.319632233067083	-	#N/A	#N/A	#N/A	#N/A	#N/A	#N/A	#N/A	#N/A	#N/A
RN_000754	0.490192061235813	0.65810896060044	-	#N/A	#N/A	#N/A	#N/A	#N/A	#N/A	#N/A	#N/A	#N/A
RN_000766	0.442671314428181	0.444240371075482	-	#N/A	#N/A	#N/A	#N/A	#N/A	#N/A	#N/A	#N/A	#N/A
RN_000784	0.407511384330319	0.81243318410393	-	#N/A	#N/A	#N/A	#N/A	#N/A	#N/A	#N/A	#N/A	#N/A
RN_000808	0.950837197671779	0.311366413552035	-	#N/A	#N/A	#N/A	#N/A	#N/A	#N/A	#N/A	#N/A	#N/A
RN_000810	1.16228783233257	1.01793975914385	-	#N/A	#N/A	#N/A	#N/A	#N/A	#N/A	#N/A	#N/A	#N/A
RN_000850	0.79900402402139	1.11834476612048	-	#N/A	#N/A	#N/A	#N/A	#N/A	#N/A	#N/A	#N/A	#N/A
RN_000860	0.345218044519616	0.383975855364337	-	REFNigelle_000860.p1	AT5G16486.1	1.87e-07	RNA-directed DNA polymerase (Reverse transcriptase)-related family protein [Source:UniProtKB/TrEMBL;Acc:Q1G3F8]	REFNigelle_000860.p1	Aqcoe6G294200.1.p	2e-12	AT3G25270.1	Ribonuclease H-like superfamily protein
RN_000877	-0.0143878732746517	-0.500219511999431	-	REFNigelle_000877.p1	AT1G29930.1	4.82e-171	LHCB1.3 description:Chlorophyll a-b binding protein 1, chloroplastic [Source:P04778]	REFNigelle_000877.p1	Aqcoe1G200700.1.p	0	AT1G29930.1	chlorophyll A/B binding protein 1
RN_000882	0.422536038924184	0.345106589864444	-	REFNigelle_000882.p1	AT5G16440.1	5.53e-40	IPP1 description:Isopentenyl-diphosphate Delta-isomerase I, chloroplastic [Source:Q38929]	REFNigelle_000882.p1	Aqcoe2G421100.1.p	2e-43	AT5G16440.1	isopentenyl diphosphate isomerase 1
RN_000898	0.37583475646793	0.532197411262493	-	#N/A	#N/A	#N/A	#N/A	#N/A	#N/A	#N/A	#N/A	#N/A
RN_000905	0.19258384544096	-0.464301529052764	-	REFNigelle_000905.p1	AT3G14620.1	3.9e-55	CYP72A8 description:AT3g14620/MIE1_12 [Source:Q9LUD2]	REFNigelle_000905.p1	Aqcoe3G173700.2.p	2e-63	AT3G14690.1	cytochrome P450, family 72, subfamily A, polypeptide 15
RN_000920	-1.15744774456802	-1.11217045478075	-	#N/A	#N/A	#N/A	#N/A	#N/A	#N/A	#N/A	#N/A	#N/A
RN_000921	0.518244652496885	0.379838120322563	-	#N/A	#N/A	#N/A	#N/A	#N/A	#N/A	#N/A	#N/A	#N/A
RN_000975	0.489493065789835	0.95898713324578	-	REFNigelle_000975.p1	AT1G40087.1	0.000479	Plant transposase (Ptta/En/Spm family) [Source:UniProtKB/TrEMBL;Acc:F4I6H5]	REFNigelle_000975.p1	Aqcoe6G195200.1.p	5e-09	AT1G40087.1	Plant transposase (Ptta/En/Spm family)
RN_000990	1.33389063939412	1.13934420539592	-	#N/A	#N/A	#N/A	#N/A	#N/A	#N/A	#N/A	#N/A	#N/A
RN_001011	0.122238584846094	0.638494306139298	-	REFNigelle_001011.p1	AT4G23990.2	2.57e-167	CSLG3 description:Cellulose synthase-like protein G3 [Source:Q0WVN5]	REFNigelle_001011.p1	Aqcoe5G450200.2.p	0	AT4G23990.1	cellulose synthase like G3
RN_001014	0.350774200993092	0.356855083756819	-	#N/A	#N/A	#N/A	#N/A	#N/A	#N/A	#N/A	#N/A	#N/A
RN_001059	0.335383652132547	0.567088578723766	-	REFNigelle_001059.p1	AT1G53360.1	4.92e-09	Putative F-box protein At1g53360 [Source:UniProtKB/Swiss-Prot;Acc:Q3ECR3]	REFNigelle_001059.p1	Aqcoe7G367200.2.p	4e-77	AT1G50870.1	F-box and associated interaction domains-containing protein
RN_001091	0.800165202661141	0.851103708852466	-	REFNigelle_001091.p1	AT3G05660.1	1.06e-41	AtRLP33 description:Receptor-like protein 33 [Source:F4J8G2]	REFNigelle_001091.p1	Aqcoe1G502400.1.p	2e-49	AT1G71400.1	receptor like protein 12
RN_001092	0.788039954513339	1.01094305118793	-	#N/A	#N/A	#N/A	#N/A	#N/A	#N/A	#N/A	#N/A	#N/A
RN_001094	0.621071644524383	0.566421990729417	-	#N/A	#N/A	#N/A	#N/A	#N/A	#N/A	#N/A	#N/A	#N/A
RN_001131	0.583375690087242	0.840128689958539	-	#N/A	#N/A	#N/A	#N/A	#N/A	#N/A	#N/A	#N/A	#N/A
RN_001135	0.230834993652927	0.351962915731206	-	REFNigelle_001135.p1	AT1G53430.1	0	Probable LRR receptor-like serine/threonine-protein kinase At1g53430 [Source:UniProtKB/Swiss-Prot;Acc:C0LGG8]	REFNigelle_001135.p1	Aqcoe4G026500.1.p	0	AT1G53440.1	Leucine-rich repeat transmembrane protein kinase
RN_001144	0.351623990402561	0.634451884517719	-	#N/A	#N/A	#N/A	#N/A	#N/A	#N/A	#N/A	#N/A	#N/A
RN_001153	-0.0328200055040245	1.3769818646753	-	#N/A	#N/A	#N/A	#N/A	#N/A	#N/A	#N/A	#N/A	#N/A
RN_001164	0.100818375597979	1.34535800525095	-	#N/A	#N/A	#N/A	#N/A	REFNigelle_001164.p1	Aqcoe2G030500.1.p	2e-10	0	0
RN_001199	0.369013815083154	0.445951286760867	-	#N/A	#N/A	#N/A	#N/A	REFNigelle_001199.p2	Aqcoe2G248200.1.p	2e-99	0	0
RN_001200	0.461072488184928	0.387606953966333	-	REFNigelle_001200.p2	AT3G21000.1	5.38e-11	Gag-Pol-related retrotransposon family protein [Source:UniProtKB/TrEMBL;Acc:Q1PEN6]	REFNigelle_001200.p2	Aqcoe5G193900.1.p	5e-06	AT5G28780.1	PIF1 helicase
RN_001205	0.618931940253362	0.572823311221007	-	#N/A	#N/A	#N/A	#N/A	#N/A	#N/A	#N/A	#N/A	#N/A
RN_001207	0.908656710903331	0.761299015827525	-	#N/A	#N/A	#N/A	#N/A	#N/A	#N/A	#N/A	#N/A	#N/A
RN_001234	0.250090157500344	0.253124323978316	-	REFNigelle_001234.p3	AT1G12230.1	9.51e-96	Aldolase superfamily protein [Source:UniProtKB/TrEMBL;Acc:F4IC59]	REFNigelle_001234.p3	Aqcoe7G078800.1.p	6e-96	AT1G12230.1	Aldolase superfamily protein
RN_001238	0.52652749229606	0.658598405159665	-	REFNigelle_001238.p1	ATMG00860.1	2.75e-26	ORF158 description:Uncharacterized mitochondrial protein AtMg00860 [Source:P92523]	REFNigelle_001238.p1	Aqcoe7G257100.1.p	5e-12	ATMG00860.1	DNA/RNA polymerases superfamily protein
RN_001240	0.357584844637638	0.560056646653643	-	#N/A	#N/A	#N/A	#N/A	#N/A	#N/A	#N/A	#N/A	#N/A
RN_001247	0.694056547037518	0.822306373094297	-	#N/A	#N/A	#N/A	#N/A	#N/A	#N/A	#N/A	#N/A	#N/A
RN_001309	-0.155136169830061	-0.396789179809106	-	REFNigelle_001309.p2	AT3G24255.4	1.4e-28	RNA-directed DNA polymerase (Reverse transcriptase)-related family protein [Source:UniProtKB/TrEMBL;Acc:A0A1I9LSY4]	REFNigelle_001309.p1	Aqcoe4G244400.1.p	2e-33	AT1G43760.1	DNAse I-like superfamily protein
RN_001328	-1.64105098809478	-2.26588679120239	-	REFNigelle_001328.p1	AT1G56120.3	4.31e-63	Leucine-rich repeat transmembrane protein kinase [Source:UniProtKB/TrEMBL;Acc:F4I3K0]	REFNigelle_001328.p1	Aqcoe6G059400.1.p	3e-92	AT1G70520.1	cysteine-rich RLK (RECEPTOR-like protein kinase) 2
RN_001367	0.332454866548944	0.534485172186037	-	#N/A	#N/A	#N/A	#N/A	#N/A	#N/A	#N/A	#N/A	#N/A
RN_001388	-0.588442673992859	-0.482731410926847	-	#N/A	#N/A	#N/A	#N/A	#N/A	#N/A	#N/A	#N/A	#N/A
RN_001446	0.369884359930333	0.566964829734692	-	#N/A	#N/A	#N/A	#N/A	#N/A	#N/A	#N/A	#N/A	#N/A
RN_001477	1.2409453620192	0.832073455255018	-	#N/A	#N/A	#N/A	#N/A	#N/A	#N/A	#N/A	#N/A	#N/A
RN_001482	0.369736570442424	1.1094389291798	-	REFNigelle_001482.p1	AT1G66930.2	5.89e-13	LRK10L-2.7 description:Protein kinase superfamily protein [Source:AT1G66930]	REFNigelle_001482.p1	Aqcoe2G401200.1.p	2e-34	AT1G67000.1	Protein kinase superfamily protein
RN_001498	0.582122852212014	1.18916897608729	-	#N/A	#N/A	#N/A	#N/A	#N/A	#N/A	#N/A	#N/A	#N/A
RN_001509	0.207520817184942	0.307613103234417	-	REFNigelle_001509.p1	AT2G01060.1	1.49e-98	PHL7 description:Myb family transcription factor PHL7 [Source:Q9SJW0]	REFNigelle_001509.p1	Aqcoe7G341000.2.p	3e-122	AT2G01060.1	myb-like HTH transcriptional regulator family protein
RN_001520	-0.698076246020674	1.43618351376193	-	REFNigelle_001520.p1	AT2G21140.1	2.59e-39	PRP2 description:Proline-rich protein 2 [Source:Q9SKP9]	REFNigelle_001520.p1	Aqcoe5G210700.1.p	1e-71	AT2G21140.1	proline-rich protein 2
RN_001535	-0.182310202763714	-0.213148716945784	-	REFNigelle_001535.p1	AT4G21530.1	0	APC4 description:Anaphase-promoting complex subunit 4 [Source:O65418]	REFNigelle_001535.p1	Aqcoe7G325400.1.p	0	AT4G21530.1	Transducin/WD40 repeat-like superfamily protein
RN_001560	-1.92168653228063	-1.0213315886312	-	#N/A	#N/A	#N/A	#N/A	#N/A	#N/A	#N/A	#N/A	#N/A
RN_001572	0.330106487174089	1.36522733495408	-	#N/A	#N/A	#N/A	#N/A	#N/A	#N/A	#N/A	#N/A	#N/A
RN_001579	-1.9115660903795	-1.46484237693353	-	#N/A	#N/A	#N/A	#N/A	#N/A	#N/A	#N/A	#N/A	#N/A
RN_001585	-0.243217975550718	-0.932576428242494	-	#N/A	#N/A	#N/A	#N/A	#N/A	#N/A	#N/A	#N/A	#N/A
RN_001629	-0.829044895127749	-1.41646032524089		REFNigelle_001629.p1	AT5G51970.1	0	SDH description:Sorbitol dehydrogenase [Source:Q9FJ95]	REFNigelle_001629.p1	Aqcoe5G426900.1.p	0	AT5G51970.2	GroES-like zinc-binding alcohol dehydrogenase family protein
RN_001645	0.565831976784356	0.570249068151536	-	#N/A	#N/A	#N/A	#N/A	#N/A	#N/A	#N/A	#N/A	#N/A
RN_001656	0.749049642229029	0.925874401214142	-	REFNigelle_001656.p1	AT1G06790.1	5.71e-70	F4H5.12 protein [Source:UniProtKB/TrEMBL;Acc:Q9M9Y6]	REFNigelle_001656.p1	Aqcoe1G186600.1.p	5e-95	AT1G06790.1	RNA polymerase Rpb7 N-terminal domain-containing protein
RN_001687	-2.23730021432601	-1.73630758674318	-	#N/A	#N/A	#N/A	#N/A	#N/A	#N/A	#N/A	#N/A	#N/A
RN_001698	2.21761407989984	2.09227174599176	-0.90013044584338	#N/A	#N/A	#N/A	#N/A	#N/A	#N/A	#N/A	#N/A	#N/A
RN_001755	-0.0987220421744176	0.339391728027644	-	#N/A	#N/A	#N/A	#N/A	#N/A	#N/A	#N/A	#N/A	#N/A
RN_001776	-0.295855938875328	1.35677014425989	-	#N/A	#N/A	#N/A	#N/A	#N/A	#N/A	#N/A	#N/A	#N/A
RN_001822	-0.124406419409017	-0.978759307674734	-	#N/A	#N/A	#N/A	#N/A	#N/A	#N/A	#N/A	#N/A	#N/A
RN_001843	0.0701605491904359	-1.43779623926159	-	REFNigelle_001843.p1	AT4G12510.1	8.28e-15	At4g12520 [Source:UniProtKB/TrEMBL;Acc:Q9S7U3]	REFNigelle_001843.p1	Aqcoe5G252200.1.p	9e-18	AT2G45180.1	Bifunctional inhibitor/lipid-transfer protein/seed storage 2S albumin superfamily protein
RN_001844	-0.232806539837746	-0.0404410634005938	-	REFNigelle_001844.p1	AT5G18380.1	6.01e-94	RPS16C description:40S ribosomal protein S16-3 [Source:Q42340]	REFNigelle_001844.p1	Aqcoe6G136600.1.p	4e-99	AT2G09990.1	Ribosomal protein S5 domain 2-like superfamily protein
RN_001856	0.480054264390563	0.175800458100788	-	REFNigelle_001856.p1	AT1G06780.1	0	GAUT6 description:Hexosyltransferase [Source:F4IDS0]	REFNigelle_001856.p1	Aqcoe5G039700.1.p	0	AT1G06780.1	galacturonosyltransferase 6
RN_001887	0.774706990696956	1.11859298042661	-	#N/A	#N/A	#N/A	#N/A	#N/A	#N/A	#N/A	#N/A	#N/A
RN_001915	0.169212447435799	0.765038631126641	-	REFNigelle_001915.p1	AT3G02130.2	0	RPK2 description:LRR receptor-like serine/threonine-protein kinase RPK2 [Source:Q9S7I6]	REFNigelle_001915.p1	Aqcoe5G331200.1.p	0	AT3G02130.1	receptor-like protein kinase 2
RN_001924	0.706928183430712	0.389498513984588	-	#N/A	#N/A	#N/A	#N/A	#N/A	#N/A	#N/A	#N/A	#N/A
RN_001937	-0.268022875883456	-0.707325255396313	-	#N/A	#N/A	#N/A	#N/A	#N/A	#N/A	#N/A	#N/A	#N/A
RN_001969	0.743693310266748	0.992676725199503	-	#N/A	#N/A	#N/A	#N/A	#N/A	#N/A	#N/A	#N/A	#N/A
RN_001998	1.15314652145003	0.233885195085768	-	#N/A	#N/A	#N/A	#N/A	#N/A	#N/A	#N/A	#N/A	#N/A
RN_002001	-0.290371256212749	-0.194056881249765	-	REFNigelle_002001.p1	AT3G61790.1	2.32e-169	SINAT3 description:E3 ubiquitin-protein ligase [Source:A0A178V9V8]	REFNigelle_002001.p1	Aqcoe2G036800.1.p	0	AT3G61790.1	Protein with RING/U-box and TRAF-like domains
RN_002006	2.70850752431467	1.45046287062123	-	#N/A	#N/A	#N/A	#N/A	REFNigelle_002006.p1	Aqcoe2G128200.1.p	2e-24	0	0
RN_002060	0.218822402744497	0.377204132978104	-	REFNigelle_002060.p1	AT5G38020.1	2.46e-48	At5g38020 [Source:UniProtKB/TrEMBL;Acc:Q84MB1]	REFNigelle_002060.p1	Aqcoe1G290800.1.p	5e-79	AT3G11480.1	S-adenosyl-L-methionine-dependent methyltransferases superfamily protein
RN_002063	1.87056051741565	2.33987302579953	-0.951852447597985	REFNigelle_002063.p1	AT3G04760.2	4.48e-110	Pentatricopeptide repeat-containing protein At3g04760, chloroplastic [Source:UniProtKB/Swiss-Prot;Acc:Q9SR00]	REFNigelle_002063.p1	Aqcoe5G023800.1.p	4e-135	AT3G04760.1	Pentatricopeptide repeat (PPR-like) superfamily protein
RN_002092	-0.560421476245673	-0.496558726251547	-	REFNigelle_002092.p2	AT3G16380.1	1.19e-56	PAB6 description:Polyadenylate-binding protein 6 [Source:O04319]	REFNigelle_002092.p2	Aqcoe5G145800.1.p	2e-49	AT1G49760.2	poly(A) binding protein 8
RN_002096	-0.879379357631824	-0.715278062956393	-	REFNigelle_002096.p1	AT3G14470.2	6.33e-14	RPPL1 description:Putative disease resistance RPP13-like protein 1 [Source:Q9LRR4]	REFNigelle_002096.p1	Aqcoe5G371700.3.p	1e-54	AT3G14470.1	NB-ARC domain-containing disease resistance protein
RN_002106	0.419167232715415	0.313513573885435	-	#N/A	#N/A	#N/A	#N/A	#N/A	#N/A	#N/A	#N/A	#N/A
RN_002124	-0.232744214275573	-0.262897790737067	-	REFNigelle_002124.p1	AT5G28750.1	6.1e-34	TATA description:Sec-independent protein translocase protein TATA, chloroplastic [Source:Q9LKU2]	REFNigelle_002124.p1	Aqcoe5G042800.1.p	3e-50	AT5G28750.1	Bacterial sec-independent translocation protein mttA/Hcf106
RN_002126	-0.777722983409607	-0.752880860046017	-	REFNigelle_002126.p1	AT1G43760.1	3.68e-12	DNAse I-like superfamily protein [Source:UniProtKB/TrEMBL;Acc:F4ICS8]	REFNigelle_002126.p1	Aqcoe2G174500.1.p	3e-15	0	0
RN_002134	-0.00363715679976642	-0.476931367315488	-	REFNigelle_002134.p1	AT5G55050.1	5.7e-58	GDSL esterase/lipase At5g55050 [Source:UniProtKB/Swiss-Prot;Acc:Q9FIA1]	REFNigelle_002134.p1	Aqcoe1G291100.1.p	2e-135	AT5G55050.1	GDSL-like Lipase/Acylhydrolase superfamily protein
RN_002174	-0.151905373190175	0.747687960886376	-	REFNigelle_002174.p1	AT5G49160.1	0	DMT1 description:DNA (cytosine-5)-methyltransferase 1 [Source:P34881]	REFNigelle_002174.p1	Aqcoe1G313500.1.p	0	AT5G49160.1	methyltransferase 1
RN_002197	0.303476552262835	0.38400421555213	-	REFNigelle_002197.p1	AT4G10770.2	1.98e-11	OPT7 description:Oligopeptide transporter 7 [Source:O82485]	REFNigelle_002197.p1	Aqcoe5G211200.5.p	2e-13	AT4G10770.1	oligopeptide transporter 7
RN_002213	0.415589828276094	0.500586779504812	-	#N/A	#N/A	#N/A	#N/A	#N/A	#N/A	#N/A	#N/A	#N/A
RN_002215	-0.315456383545739	-0.550558568502014	-	REFNigelle_002215.p1	AT3G24255.4	5.03e-33	RNA-directed DNA polymerase (Reverse transcriptase)-related family protein [Source:UniProtKB/TrEMBL;Acc:A0A1I9LSY4]	REFNigelle_002215.p2	Aqcoe2G128200.1.p	1e-22	0	0
RN_002227	-1.61620669090719	-0.831693315109938	-	#N/A	#N/A	#N/A	#N/A	#N/A	#N/A	#N/A	#N/A	#N/A
RN_002257	0.36831253795304	0.878105110115913	-	REFNigelle_002257.p1	AT1G17330.1	1.12e-58	At1g17330 [Source:UniProtKB/TrEMBL;Acc:Q8GUM8]	REFNigelle_002257.p1	Aqcoe3G434300.7.p	2e-73	AT1G17330.1	Metal-dependent phosphohydrolase
RN_002264	0.457561108645062	0.713601691542861	-	#N/A	#N/A	#N/A	#N/A	#N/A	#N/A	#N/A	#N/A	#N/A
RN_002266	0.86153037271974	-0.505523585870694	-	#N/A	#N/A	#N/A	#N/A	#N/A	#N/A	#N/A	#N/A	#N/A
RN_002306	0.460883824828097	0.546535613757668	-	#N/A	#N/A	#N/A	#N/A	#N/A	#N/A	#N/A	#N/A	#N/A
RN_002308	0.288030161862435	0.5550622364194	-	#N/A	#N/A	#N/A	#N/A	#N/A	#N/A	#N/A	#N/A	#N/A
RN_002316	0.395968055382527	0.471064646596793	-	#N/A	#N/A	#N/A	#N/A	#N/A	#N/A	#N/A	#N/A	#N/A
RN_002331	0.0786555378084658	0.486293965752823	-	#N/A	#N/A	#N/A	#N/A	#N/A	#N/A	#N/A	#N/A	#N/A
RN_002335	0.585654585838284	0.0659118455152118	-	REFNigelle_002335.p1	AT3G21250.5	0	MRP6 description:Multidrug resistance-associated protein 6 [Source:A0A1I9LPV5]	REFNigelle_002335.p1	Aqcoe7G413500.2.p	0	AT3G21250.2	multidrug resistance-associated protein 6
RN_002342	0.490939515902945	0.8536878864747	-	#N/A	#N/A	#N/A	#N/A	#N/A	#N/A	#N/A	#N/A	#N/A
RN_002379	0.365354359895263	0.636662450020205	-	#N/A	#N/A	#N/A	#N/A	#N/A	#N/A	#N/A	#N/A	#N/A
RN_002390	-0.935989452693584	-0.773659377709809	-	#N/A	#N/A	#N/A	#N/A	REFNigelle_002390.p2	Aqcoe2G128200.1.p	3e-27	0	0
RN_002399	0.376938933933014	0.454562110595475	-	#N/A	#N/A	#N/A	#N/A	#N/A	#N/A	#N/A	#N/A	#N/A
RN_002410	1.0193341352303	1.35106099155836	-	#N/A	#N/A	#N/A	#N/A	#N/A	#N/A	#N/A	#N/A	#N/A
RN_002414	-0.0953202230372996	-0.44491797839007	-	#N/A	#N/A	#N/A	#N/A	REFNigelle_002414.p3	Aqcoe2G128200.1.p	2e-06	0	0
RN_002419	0.414509568164822	0.337502786659242	-	#N/A	#N/A	#N/A	#N/A	#N/A	#N/A	#N/A	#N/A	#N/A
RN_002431	0.436432884799289	0.970992777185649	-	#N/A	#N/A	#N/A	#N/A	#N/A	#N/A	#N/A	#N/A	#N/A
RN_002432	0.52236522458547	0.443529530368765	-	#N/A	#N/A	#N/A	#N/A	#N/A	#N/A	#N/A	#N/A	#N/A
RN_002433	0.4075175418899	0.605913355062384	-	REFNigelle_002433.p1	AT3G14840.2	6.11e-156	LRR-RLK description:Probable leucine-rich repeat receptor-like serine/threonine-protein kinase At3g14840 [Source:C0LGN2]	REFNigelle_002433.p1	Aqcoe4G026000.1.p	0	AT3G14840.2	Leucine-rich repeat transmembrane protein kinase
RN_002434	0.292749704176603	0.377359298620785	-	#N/A	#N/A	#N/A	#N/A	#N/A	#N/A	#N/A	#N/A	#N/A
RN_002449	1.06476403323644	0.551320203892876	-	#N/A	#N/A	#N/A	#N/A	#N/A	#N/A	#N/A	#N/A	#N/A
RN_002464	-0.5596268954382	-0.621434807478151	-	REFNigelle_002464.p1	ATMG00860.1	2.27e-33	ORF158 description:Uncharacterized mitochondrial protein AtMg00860 [Source:P92523]	REFNigelle_002464.p1	Aqcoe7G257100.1.p	8e-09	ATMG00860.1	DNA/RNA polymerases superfamily protein
RN_002466	0.366318792334575	0.518439381160766	-	#N/A	#N/A	#N/A	#N/A	#N/A	#N/A	#N/A	#N/A	#N/A
RN_002479	-0.116440001934974	-0.21522384067052	-	REFNigelle_002479.p1	AT3G58180.1	1.82e-166	Deoxyhypusine hydroxylase [Source:UniProtKB/Swiss-Prot;Acc:Q94JW0]	REFNigelle_002479.p1	Aqcoe5G032400.1.p	1e-180	AT3G58180.1	ARM repeat superfamily protein
RN_002521	-1.16773452855062	-2.17004433098737	-	#N/A	#N/A	#N/A	#N/A	#N/A	#N/A	#N/A	#N/A	#N/A
RN_002558	0.862482640072379	1.04451911205549	-	#N/A	#N/A	#N/A	#N/A	#N/A	#N/A	#N/A	#N/A	#N/A
RN_002566	0.310962629931935	0.466759872569756	-	REFNigelle_002566.p1	AT5G17540.1	1.62e-142	At5g17540 [Source:UniProtKB/TrEMBL;Acc:Q9LF70]	REFNigelle_002566.p1	Aqcoe5G357400.1.p	0	AT5G17540.1	HXXXD-type acyl-transferase family protein
RN_002638	1.38474952467762	-0.785651217926426	0.876288330542028	#N/A	#N/A	#N/A	#N/A	#N/A	#N/A	#N/A	#N/A	#N/A
RN_002653	0.53551101610123	0.63121138439267	-	#N/A	#N/A	#N/A	#N/A	#N/A	#N/A	#N/A	#N/A	#N/A
RN_002684	0.337423444990095	0.432376064236756	-	REFNigelle_002684.p1	AT5G47180.2	1.17e-36	PVA21 description:Vesicle-associated protein 2-1 [Source:Q9LVU1]	REFNigelle_002684.p1	Aqcoe5G073300.1.p	3e-42	AT1G08820.1	vamp/synaptobrevin-associated protein 27-2
RN_002751	0.469484394404289	0.559425227222447	-	#N/A	#N/A	#N/A	#N/A	#N/A	#N/A	#N/A	#N/A	#N/A
RN_002754	-0.923103829702823	-1.1252784706751	-	#N/A	#N/A	#N/A	#N/A	#N/A	#N/A	#N/A	#N/A	#N/A
RN_002821	2.73178993408712	0.308043803836314	-	REFNigelle_002821.p2	AT1G52190.1	1.73e-14	NPF1.2 description:Protein NRT1/ PTR FAMILY 1.2 [Source:Q9M817]	REFNigelle_002821.p1	Aqcoe3G167000.1.p	3e-37	AT4G33280.1	AP2/B3-like transcriptional factor family protein
RN_002867	1.50054559811779	2.02903228739271	-	REFNigelle_002867.p1	AT3G47910.1	1.1e-98	Ubiquitin carboxyl-terminal hydrolase-related protein [Source:UniProtKB/TrEMBL;Acc:F4JCR3]	REFNigelle_002867.p1	Aqcoe3G321800.4.p	1e-120	AT3G47890.1	Ubiquitin carboxyl-terminal hydrolase-related protein
RN_002871	0.335398448066703	0.339688848281206	-	#N/A	#N/A	#N/A	#N/A	#N/A	#N/A	#N/A	#N/A	#N/A
RN_002873	0.846444801193825	1.54878080157235	-0.871684499388935	#N/A	#N/A	#N/A	#N/A	#N/A	#N/A	#N/A	#N/A	#N/A
RN_002882	-1.8941398620107	-1.06286954648804	-	REFNigelle_002882.p1	AT5G49610.1	5.14e-19	F-box protein At5g49610 [Source:UniProtKB/Swiss-Prot;Acc:Q9FGY4]	REFNigelle_002882.p1	Aqcoe7G367200.2.p	3e-79	AT1G50870.1	F-box and associated interaction domains-containing protein
RN_002945	0.603633380218534	0.159338403589158	-	#N/A	#N/A	#N/A	#N/A	#N/A	#N/A	#N/A	#N/A	#N/A
RN_002960	-0.37471898558953	-1.28055119995589	-	#N/A	#N/A	#N/A	#N/A	#N/A	#N/A	#N/A	#N/A	#N/A
RN_002987	-0.589611624025854	-0.315887530227702	-	REFNigelle_002987.p1	AT3G04620.1	3.93e-53	Alba DNA/RNA-binding protein [Source:UniProtKB/TrEMBL;Acc:Q9SR12]	REFNigelle_002987.p1	Aqcoe5G037700.1.p	2e-73	AT3G04620.1	Alba DNA/RNA-binding protein
RN_002991	0.489922185161976	-0.313184324772558	-	REFNigelle_002991.p1	AT3G54340.1	1.36e-65	AP3 description:Floral homeotic protein APETALA 3 [Source:P35632]	REFNigelle_002991.p1	Aqcoe6G257300.1.p	2e-117	AT3G54340.1	K-box region and MADS-box transcription factor family protein
RN_003004	1.41106843759539	1.22468399634803	-0.839103202480648	#N/A	#N/A	#N/A	#N/A	#N/A	#N/A	#N/A	#N/A	#N/A
RN_003044	0.897915038037044	0.503467445641868	-	#N/A	#N/A	#N/A	#N/A	#N/A	#N/A	#N/A	#N/A	#N/A
RN_003149	-1.00402014996549	-1.12659747126359		REFNigelle_003149.p1	AT2G04865.2	2.34e-44	Protein MAIN-LIKE 2 [Source:UniProtKB/Swiss-Prot;Acc:F4IFD0]	REFNigelle_003149.p1	Aqcoe4G009800.1.p	2e-08	AT1G48120.1	hydrolases;protein serine/threonine phosphatases
RN_003180	-0.968654946401137	-1.19649184821338	-	#N/A	#N/A	#N/A	#N/A	#N/A	#N/A	#N/A	#N/A	#N/A
RN_003221	0.262755560919082	0.486624545876484	-	#N/A	#N/A	#N/A	#N/A	#N/A	#N/A	#N/A	#N/A	#N/A
RN_003222	-0.231375294570314	-0.0831757938402559	-	REFNigelle_003222.p1	AT5G38690.2	6.09e-92	AT5g38690/MBB18_24 [Source:UniProtKB/TrEMBL;Acc:Q8RW95]	REFNigelle_003222.p1	Aqcoe3G398200.1.p	2e-130	AT5G38690.1	Zinc-finger domain of monoamine-oxidase A repressor R1 protein
RN_003259	-0.0446508715362997	-0.46240561965606	-	REFNigelle_003259.p1	AT1G23870.1	0	TPS9 description:Probable alpha,alpha-trehalose-phosphate synthase [UDP-forming] 9 [Source:Q9LRA7]	REFNigelle_003259.p1	Aqcoe3G114000.2.p	0	AT1G23870.1	trehalose-phosphatase/synthase 9
RN_003303	0.871374220233076	0.351047628500211	-	REFNigelle_003303.p1	AT1G16060.1	3.94e-119	ADAP description:AP2-like ethylene-responsive transcription factor At1g16060 [Source:Q94AN4]	REFNigelle_003303.p1	Aqcoe7G221500.1.p	7e-128	AT1G16060.1	ARIA-interacting double AP2 domain protein
RN_003352	1.38422839328801	0.751921977961094	-	#N/A	#N/A	#N/A	#N/A	#N/A	#N/A	#N/A	#N/A	#N/A
RN_003494	0.468329565971593	0.147634678054546	-	#N/A	#N/A	#N/A	#N/A	#N/A	#N/A	#N/A	#N/A	#N/A
RN_003542	2.35370376123017	-0.0830994550810536	-	REFNigelle_003542.p1	AT4G11070.1	1.03e-57	WRKY41 description:Probable WRKY transcription factor 41 [Source:Q8H0Y8]	REFNigelle_003542.p1	Aqcoe7G014800.1.p	5e-158	AT4G11070.1	WRKY family transcription factor
RN_003548	-2.61684352101283	-2.82538712107229	-	#N/A	#N/A	#N/A	#N/A	#N/A	#N/A	#N/A	#N/A	#N/A
RN_003558	0.506899285563426	1.19618911080956	-	#N/A	#N/A	#N/A	#N/A	#N/A	#N/A	#N/A	#N/A	#N/A
RN_003580	-0.0560774797516883	-0.991106165930158	-	REFNigelle_003580.p1	AT2G37670.2	8.88e-156	Transducin/WD40 repeat-like superfamily protein [Source:TAIR;Acc:AT2G37670]	REFNigelle_003580.p1	Aqcoe3G350400.1.p	0	AT2G37670.1	Transducin/WD40 repeat-like superfamily protein
RN_003606	-1.37325629739103	-0.820821035197935	0.915067500569315	#N/A	#N/A	#N/A	#N/A	#N/A	#N/A	#N/A	#N/A	#N/A
RN_003645	-0.304226421374122	-1.07381028655232		REFNigelle_003645.p1	AT5G65730.1	8.82e-157	XTH6 description:Xyloglucan endotransglucosylase/hydrolase [Source:Q0WUU2]	REFNigelle_003645.p1	Aqcoe7G355700.1.p	0	AT5G65730.1	xyloglucan endotransglucosylase/hydrolase 6
RN_003671	0.666134807809019	1.52452632676839	-	#N/A	#N/A	#N/A	#N/A	#N/A	#N/A	#N/A	#N/A	#N/A
RN_003767	0.463785246213268	1.13112206971127	-	REFNigelle_003767.p1	AT1G65770.1	9.43e-10	AMR1 description:Putative F-box protein At1g65770 [Source:Q9SHX9]	REFNigelle_003767.p1	Aqcoe6G059600.1.p	2e-22	AT2G17030.1	F-box family protein with a domain of unknown function (DUF295)
RN_003819	1.89800205125864	2.42462861918039	-	#N/A	#N/A	#N/A	#N/A	#N/A	#N/A	#N/A	#N/A	#N/A
RN_003834	0.494300503859279	0.969874886053121	-	REFNigelle_003834.p1	AT4G10380.1	2.05e-158	NIP5-1 description:At4g10380 [Source:A3KPG0]	REFNigelle_003834.p1	Aqcoe3G405400.1.p	2e-162	AT4G10380.1	NOD26-like intrinsic protein 5;1
RN_003857	0.825920834643655	1.0268163973455		REFNigelle_003857.p1	AT5G21150.1	0	AGO9 description:Protein argonaute 9 [Source:Q84VQ0]	REFNigelle_003857.p1	Aqcoe3G436200.1.p	0	AT2G27040.2	Argonaute family protein
RN_003858	-1.71254185416397	-1.6863876789895	0.979825775814273	REFNigelle_003858.p1	AT5G21150.1	0	AGO9 description:Protein argonaute 9 [Source:Q84VQ0]	REFNigelle_003858.p1	Aqcoe3G436200.1.p	0	AT2G27040.2	Argonaute family protein
RN_003870	-1.57902692218381	-1.58786864481331	-	#N/A	#N/A	#N/A	#N/A	#N/A	#N/A	#N/A	#N/A	#N/A
RN_003889	0.199956656148393	0.483409450614749	-	REFNigelle_003889.p1	AT5G28640.1	4.96e-40	GIF1 description:GRF1-interacting factor 1 [Source:Q8L8A5]	REFNigelle_003889.p1	Aqcoe5G034000.1.p	2e-57	AT5G28640.1	SSXT family protein
RN_003996	0.741370600069709	0.727611033266943	-	#N/A	#N/A	#N/A	#N/A	#N/A	#N/A	#N/A	#N/A	#N/A
RN_004004	-0.0696303480562297	-0.345838671738492	-	#N/A	#N/A	#N/A	#N/A	#N/A	#N/A	#N/A	#N/A	#N/A
RN_004017	0.908432097916792	0.536681688686922	-	#N/A	#N/A	#N/A	#N/A	#N/A	#N/A	#N/A	#N/A	#N/A
RN_004026	-0.228334764749663	-0.191845506046574	-	REFNigelle_004026.p1	AT2G44640.1	2.36e-167	Expressed protein [Source:UniProtKB/TrEMBL;Acc:O80503]	REFNigelle_004026.p1	Aqcoe3G255800.1.p	0	AT2G44640.1	0
RN_004045	-0.0414586071339934	-0.37847784600705	-	REFNigelle_004045.p1	AT3G62420.1	1.21e-43	BZIP53 description:bZIP transcription factor 53 [Source:Q9LZP8]	REFNigelle_004045.p1	Aqcoe5G321600.1.p	4e-43	AT3G62420.1	basic region/leucine zipper motif 53
RN_004077	-0.832253222470984	-0.871541106889151	-	#N/A	#N/A	#N/A	#N/A	#N/A	#N/A	#N/A	#N/A	#N/A
RN_004175	0.599182953575475	0.806878741554024	-	#N/A	#N/A	#N/A	#N/A	REFNigelle_004175.p1	Aqcoe1G271000.1.p	0.0004	AT1G62310.1	transcription factor jumonji (jmjC) domain-containing protein
RN_004218	1.50293494945151	1.14775400577804	0.858784776749306	#N/A	#N/A	#N/A	#N/A	#N/A	#N/A	#N/A	#N/A	#N/A
RN_004265	0.0537558092942226	-0.700230696776531	-	#N/A	#N/A	#N/A	#N/A	#N/A	#N/A	#N/A	#N/A	#N/A
RN_004293	1.09515349009725	-0.18275833582955	-	#N/A	#N/A	#N/A	#N/A	#N/A	#N/A	#N/A	#N/A	#N/A
RN_004310	0.135664480699085	0.508544310951746	-	REFNigelle_004310.p1	AT3G47420.2	0	ATPS3 description:Putative glycerol-3-phosphate transporter 1 [Source:Q9C5L3]	REFNigelle_004310.p1	Aqcoe5G417400.4.p	0	AT3G47420.1	phosphate starvation-induced gene 3
RN_004333	5.5583639257948	5.79459859611796	-	#N/A	#N/A	#N/A	#N/A	#N/A	#N/A	#N/A	#N/A	#N/A
RN_004385	0.803246890837728	1.27405906599091	-	REFNigelle_004385.p1	AT4G29680.1	0	Alkaline-phosphatase-like family protein [Source:UniProtKB/TrEMBL;Acc:Q9SU83]	REFNigelle_004385.p1	Aqcoe7G129700.1.p	0	AT4G29680.1	Alkaline-phosphatase-like family protein
RN_004409	-2.19458842124719	-0.749220300069317	-	#N/A	#N/A	#N/A	#N/A	#N/A	#N/A	#N/A	#N/A	#N/A
RN_004412	0.672755380221081	0.508200495831233	-	#N/A	#N/A	#N/A	#N/A	#N/A	#N/A	#N/A	#N/A	#N/A
RN_004430	0.274699135860335	0.814678095875262	-	REFNigelle_004430.p1	AT4G21120.1	0	CAT1 description:CAT1 [Source:A0A178UYU0]	REFNigelle_004430.p1	Aqcoe7G370400.1.p	0	AT4G21120.1	amino acid transporter 1
RN_004437	12	12	-	#N/A	#N/A	#N/A	#N/A	#N/A	#N/A	#N/A	#N/A	#N/A
RN_004446	-0.347617097778066	-1.51652133940901	-	#N/A	#N/A	#N/A	#N/A	#N/A	#N/A	#N/A	#N/A	#N/A
RN_004450	-1.95723393662185	-2.68299725967134	0.870417140505729	REFNigelle_004450.p1	AT1G16670.1	8.61e-62	CRPK1 description:Cold-responsive protein kinase 1 [Source:Q93YN1]	REFNigelle_004450.p1	Aqcoe6G059400.1.p	1e-81	AT1G70520.1	cysteine-rich RLK (RECEPTOR-like protein kinase) 2
RN_004479	0.531306671837681	0.677690030685598	-	#N/A	#N/A	#N/A	#N/A	#N/A	#N/A	#N/A	#N/A	#N/A
RN_004481	-0.676855171988325	-0.583510251811312	-	REFNigelle_004481.p1	AT3G04760.1	9.74e-107	Pentatricopeptide repeat-containing protein At3g04760, chloroplastic [Source:UniProtKB/Swiss-Prot;Acc:Q9SR00]	REFNigelle_004481.p1	Aqcoe5G023800.1.p	2e-122	AT3G04760.1	Pentatricopeptide repeat (PPR-like) superfamily protein
RN_004556	0.0134774226576996	-0.42280871139551	-	REFNigelle_004556.p1	AT5G04040.2	0	SDP1 description:SDP1 [Source:A0A178UB07]	REFNigelle_004556.p1	Aqcoe2G032500.1.p	0	AT5G04040.1	Patatin-like phospholipase family protein
RN_004560	0.558336338995225	1.80147082173435	-	#N/A	#N/A	#N/A	#N/A	#N/A	#N/A	#N/A	#N/A	#N/A
RN_004572	-0.7173007735102	-0.531565594442336	-	#N/A	#N/A	#N/A	#N/A	#N/A	#N/A	#N/A	#N/A	#N/A
RN_004598	0.685212685489956	0.291547161354322	-	#N/A	#N/A	#N/A	#N/A	#N/A	#N/A	#N/A	#N/A	#N/A
RN_004610	1.31901670685059	0.498517979198169	-	#N/A	#N/A	#N/A	#N/A	REFNigelle_004610.p1	Aqcoe7G048600.1.p	1e-13	ATMG00310.1	RNA-directed DNA polymerase (reverse transcriptase)-related family protein
RN_004626	0.613799115297963	0.335864032482266	-	#N/A	#N/A	#N/A	#N/A	#N/A	#N/A	#N/A	#N/A	#N/A
RN_004628	-1.38070304207127	-1.38962161137107	-	REFNigelle_004628.p1	AT1G03220.1	1.28e-119	Eukaryotic aspartyl protease family protein [Source:UniProtKB/TrEMBL;Acc:Q9ZVS4]	REFNigelle_004628.p1	Aqcoe2G333100.1.p	1e-146	AT1G03220.1	Eukaryotic aspartyl protease family protein
RN_004651	0.812117421250768	0.770256866609393	-	REFNigelle_004651.p1	AT4G30410.1	1.57e-35	IBL1 description:Transcription factor IBH1-like 1 [Source:Q9M0B9]	REFNigelle_004651.p1	Aqcoe7G339000.1.p	1e-40	AT4G30410.2	sequence-specific DNA binding transcription factors
RN_004658	-1.12718522562003	-0.657167360321392	-	REFNigelle_004658.p1	AT3G17700.1	0	CNGC20 description:Probable cyclic nucleotide-gated ion channel 20, chloroplastic [Source:Q9LD37]	REFNigelle_004658.p1	Aqcoe3G421600.1.p	0	AT3G17700.1	cyclic nucleotide-binding transporter 1
RN_004695	-0.252190547673808	-0.17914711111631	-	REFNigelle_004695.p1	AT3G07320.1	0	O-Glycosyl hydrolases family 17 protein [Source:UniProtKB/TrEMBL;Acc:Q9SRT4]	REFNigelle_004695.p1	Aqcoe2G403400.1.p	0	AT3G07320.1	O-Glycosyl hydrolases family 17 protein
RN_004721	0.88520941711217	1.14798375655831	-	REFNigelle_004721.p1	AT4G23160.2	2.74e-110	CRK8 description:cysteine-rich RLK (RECEPTOR-like protein kinase) 8 [Source:AT4G23160]	REFNigelle_004721.p2	Aqcoe5G193900.1.p	2e-05	AT5G28780.1	PIF1 helicase
RN_004762	-0.197024397166003	-0.344747722343614	-	REFNigelle_004762.p2	AT5G27690.1	4.87e-31	HIPP36 description:Heavy metal-associated isoprenylated plant protein 36 [Source:Q84J88]	REFNigelle_004762.p2	Aqcoe5G084000.1.p	8e-41	AT5G27690.1	Heavy metal transport/detoxification superfamily protein
RN_004812	-0.255856681472694	-0.187266780619935	-	REFNigelle_004812.p1	AT5G52860.1	0	ABCG8 description:ABC transporter G family member 8 [Source:Q9FLX5]	REFNigelle_004812.p1	Aqcoe7G020800.1.p	0	AT5G52860.1	ABC-2 type transporter family protein
RN_004843	0.505972295323378	0.605981843278318	-	REFNigelle_004843.p1	AT5G18880.1	1.01e-14	RNA-directed DNA polymerase (Reverse transcriptase)-related family protein [Source:UniProtKB/TrEMBL;Acc:Q3E9D7]	REFNigelle_004843.p1	Aqcoe3G174500.1.p	2e-27	AT3G09510.1	Ribonuclease H-like superfamily protein
RN_004917	0.275383902579007	1.11363843363124	-	#N/A	#N/A	#N/A	#N/A	#N/A	#N/A	#N/A	#N/A	#N/A
RN_004919	-0.214958878968887	-0.209988884368459	-	REFNigelle_004919.p1	AT1G69910.1	0	LRK10L-1.5 description:LEAF RUST 10 DISEASE-RESISTANCE LOCUS RECEPTOR-LIKE PROTEIN KINASE-like 1.5 [Source:F4I3V3]	REFNigelle_004919.p1	Aqcoe3G098000.2.p	0	AT1G69910.1	Protein kinase superfamily protein
RN_004953	-0.583569299142292	-1.26493042012645	-	#N/A	#N/A	#N/A	#N/A	#N/A	#N/A	#N/A	#N/A	#N/A
RN_005011	0.698575692690219	0.947496038087046	-	#N/A	#N/A	#N/A	#N/A	#N/A	#N/A	#N/A	#N/A	#N/A
RN_005027	-0.417110026804981	-0.569907640313952	-	REFNigelle_005027.p1	AT1G10970.1	5.72e-153	ZIP4 description:Zinc transporter 4, chloroplastic [Source:O04089]	REFNigelle_005027.p1	Aqcoe7G127600.1.p	2e-178	AT1G10970.1	zinc transporter 4 precursor
RN_005057	0.276457144350146	0.1949984820441	-	REFNigelle_005057.p1	AT5G24030.1	0	SLAH3 description:S-type anion channel SLAH3 [Source:Q9FLV9]	REFNigelle_005057.p1	Aqcoe5G439400.2.p	0	AT5G24030.1	SLAC1 homologue 3
RN_005091	-0.0460832900190812	-0.363858035535111	-	REFNigelle_005091.p1	AT3G61490.4	0	Pectin lyase-like superfamily protein [Source:UniProtKB/TrEMBL;Acc:A0A1I9LS88]	REFNigelle_005091.p1	Aqcoe5G435000.1.p	0	AT3G48950.1	Pectin lyase-like superfamily protein
RN_005097	-0.901777894506737	-0.761252734963981	-	#N/A	#N/A	#N/A	#N/A	#N/A	#N/A	#N/A	#N/A	#N/A
RN_005136	-0.213855308859745	-0.203476531121073	-	REFNigelle_005136.p1	AT1G68560.1	0	XYL1 description:Alpha-xylosidase 1 [Source:Q9S7Y7]	REFNigelle_005136.p1	Aqcoe3G401200.1.p	0	AT1G68560.1	alpha-xylosidase 1
RN_005145	-1.11519824675509	-0.245289931928898	-	#N/A	#N/A	#N/A	#N/A	#N/A	#N/A	#N/A	#N/A	#N/A
RN_005175	0.642847925584331	0.794285035525906	-	#N/A	#N/A	#N/A	#N/A	#N/A	#N/A	#N/A	#N/A	#N/A
RN_005221	-0.149494537696377	-1.54964653812029	0.855469200446561	#N/A	#N/A	#N/A	#N/A	#N/A	#N/A	#N/A	#N/A	#N/A
RN_005229	1.62433776137047	1.54632556343923	-	REFNigelle_005229.p1	AT3G21670.1	0	NPF6.4 description:Protein NRT1/ PTR FAMILY 6.4 [Source:Q9LVE0]	REFNigelle_005229.p1	Aqcoe1G340900.1.p	0	AT3G21670.1	Major facilitator superfamily protein
RN_005247	-0.553538228490508	-0.5518499814527	-	REFNigelle_005247.p2	ATMG01250.1	3.59e-09	ORF102 description:Uncharacterized mitochondrial protein AtMg01250 [Source:P92555]	REFNigelle_005247.p1	Aqcoe7G048600.1.p	2e-32	ATMG00310.1	RNA-directed DNA polymerase (reverse transcriptase)-related family protein
RN_005306	-0.100165824415771	-0.267693033733512	-	REFNigelle_005306.p1	AT1G53310.3	0	PPC1 description:Phosphoenolpyruvate carboxylase 1 [Source:Q9MAH0]	REFNigelle_005306.p1	Aqcoe4G046500.1.p	0	AT3G14940.1	phosphoenolpyruvate carboxylase 3
RN_005392	0.35315022882411	0.554672635570728	-	REFNigelle_005392.p1	AT4G13510.1	1.4e-171	AMT1-1 description:Ammonium transporter [Source:A0A178V540]	REFNigelle_005392.p1	Aqcoe5G010700.1.p	2e-169	AT4G13510.1	ammonium transporter 1;1
RN_005421	0.866395001931221	0.523403219968012	-	REFNigelle_005421.p1	AT4G36740.1	1.02e-56	HB-5 description:homeobox protein 40 [Source:AT4G36740]	REFNigelle_005421.p1	Aqcoe5G197900.1.p	2e-95	AT4G36740.1	homeobox protein 40
RN_005428	0.697530473283344	0.38164420232901	-	REFNigelle_005428.p1	AT3G48770.1	0	ATP/DNA binding protein [Source:UniProtKB/TrEMBL;Acc:Q9M305]	REFNigelle_005428.p1	Aqcoe5G344300.2.p	0	AT3G48770.1	DNA binding;ATP binding
RN_005431	0.699005929636264	0.561357846142256	-	REFNigelle_005431.p1	AT2G18540.2	9.17e-119	RmlC-like cupins superfamily protein [Source:TAIR;Acc:AT2G18540]	REFNigelle_005431.p1	Aqcoe5G197400.1.p	0	AT2G18540.1	RmlC-like cupins superfamily protein
RN_005445	0.926698395089936	0.674835338040959	-	#N/A	#N/A	#N/A	#N/A	#N/A	#N/A	#N/A	#N/A	#N/A
RN_005456	1.24903142138491	0.832151767996821	-	REFNigelle_005456.p1	AT1G69550.1	9.59e-18	Disease resistance protein (TIR-NBS-LRR class) [Source:UniProtKB/TrEMBL;Acc:F4I270]	REFNigelle_005456.p1	Aqcoe6G185400.1.p	2e-42	AT3G14460.1	LRR and NB-ARC domains-containing disease resistance protein
RN_005533	-0.182175499456521	-0.220708222538684	-	REFNigelle_005533.p1	AT4G14540.1	6.49e-75	NFYB3 description:Nuclear transcription factor Y subunit B-3 [Source:O23310]	REFNigelle_005533.p1	Aqcoe5G225600.1.p	1e-62	AT4G14540.1	nuclear factor Y, subunit B3
RN_005539	-0.795113187144166	-0.299424586764267	-	#N/A	#N/A	#N/A	#N/A	#N/A	#N/A	#N/A	#N/A	#N/A
RN_005567	1.33355917021599	1.72075629858332	-	#N/A	#N/A	#N/A	#N/A	#N/A	#N/A	#N/A	#N/A	#N/A
RN_005613	-0.524382472358803	-1.08867045992219	-	REFNigelle_005613.p2	AT5G03780.1	5.68e-13	TRFL10 description:TRF-like 10 (Fragment) [Source:C0SVN2]	REFNigelle_005613.p1	Aqcoe3G418600.5.p	1e-48	AT5G03780.1	TRF-like 10
RN_005652	0.463209754759481	0.501718962808772	-	REFNigelle_005652.p1	AT1G66910.2	3.46e-112	LRK10L-2.5 description:LEAF RUST 10 DISEASE-RESISTANCE LOCUS RECEPTOR-LIKE PROTEIN KINASE-like 2.5 [Source:F4HQ20]	REFNigelle_005652.p1	Aqcoe2G401000.1.p	1e-157	AT1G66930.1	Protein kinase superfamily protein
RN_005681	0.901970431490801	0.482354938191392	-	REFNigelle_005681.p1	AT1G43760.1	0.000174	DNAse I-like superfamily protein [Source:UniProtKB/TrEMBL;Acc:F4ICS8]	REFNigelle_005681.p1	Aqcoe7G292400.1.p	2e-24	AT1G43760.1	DNAse I-like superfamily protein
RN_005686	0.907237623112836	0.833349279963149	-	#N/A	#N/A	#N/A	#N/A	#N/A	#N/A	#N/A	#N/A	#N/A
RN_005689	3.12073788627005	2.4192086726789	-	#N/A	#N/A	#N/A	#N/A	#N/A	#N/A	#N/A	#N/A	#N/A
RN_005728	0.850125603425712	0.594354206780003	-	#N/A	#N/A	#N/A	#N/A	#N/A	#N/A	#N/A	#N/A	#N/A
RN_005749	-1.54476749062711	-1.58306944352857	-	#N/A	#N/A	#N/A	#N/A	#N/A	#N/A	#N/A	#N/A	#N/A
RN_005754	-0.606397596584392	-0.804218842590584	-	#N/A	#N/A	#N/A	#N/A	#N/A	#N/A	#N/A	#N/A	#N/A
RN_005797	0.413871992856709	0.231850713093197	-	#N/A	#N/A	#N/A	#N/A	#N/A	#N/A	#N/A	#N/A	#N/A
RN_005803	0.399019167792047	0.5319661548195	-	#N/A	#N/A	#N/A	#N/A	#N/A	#N/A	#N/A	#N/A	#N/A
RN_005810	-0.253757766237955	-0.251671704176575	-	#N/A	#N/A	#N/A	#N/A	#N/A	#N/A	#N/A	#N/A	#N/A
RN_005856	2.23480212223883	2.58910793935378	-0.993151024130383	#N/A	#N/A	#N/A	#N/A	#N/A	#N/A	#N/A	#N/A	#N/A
RN_005887	0.587705490599764	0.471427711848709	-	REFNigelle_005887.p1	AT4G14130.1	1.29e-150	XTH15 description:Xyloglucan endotransglucosylase/hydrolase protein 15 [Source:Q38911]	REFNigelle_005887.p1	Aqcoe1G208000.1.p	6e-174	AT3G23730.1	xyloglucan endotransglucosylase/hydrolase 16
RN_005950	0.0121670068749417	1.13889449619272	-	#N/A	#N/A	#N/A	#N/A	#N/A	#N/A	#N/A	#N/A	#N/A
RN_005955	-0.988281499313034	-1.03346543853844	-	#N/A	#N/A	#N/A	#N/A	#N/A	#N/A	#N/A	#N/A	#N/A
RN_005966	1.12458245316049	1.16124012584415	0.978821679921748	#N/A	#N/A	#N/A	#N/A	#N/A	#N/A	#N/A	#N/A	#N/A
RN_005983	0.483666015307259	0.440666357239615	-	REFNigelle_005983.p1	AT3G02570.1	9.05e-62	PMI1 description:PMI1 [Source:A0A178VN24]	REFNigelle_005983.p1	Aqcoe3G034100.2.p	4e-91	AT3G02570.1	Mannose-6-phosphate isomerase, type I
RN_005991	-0.0260719448198476	-0.22278161544761	-	REFNigelle_005991.p1	AT5G17900.1	1.25e-168	Microfibril-associated protein-like [Source:UniProtKB/TrEMBL;Acc:Q9FKN6]	REFNigelle_005991.p1	Aqcoe6G036400.1.p	2e-104	AT5G17900.1	microfibrillar-associated protein-related
RN_006002	0.206575320400344	0.286055816377874	-	REFNigelle_006002.p1	AT3G42170.2	1.69e-29	HAT description:DAYSLEEPER [Source:A0A178VJS5]	REFNigelle_006002.p1	Aqcoe3G393700.1.p	1e-13	AT1G18560.1	BED zinc finger ;hAT family dimerisation domain
RN_006009	0.36581657294146	0.647621451168108	-	#N/A	#N/A	#N/A	#N/A	#N/A	#N/A	#N/A	#N/A	#N/A
RN_006018	1.34743455665006	0.779623164478633	-	REFNigelle_006018.p1	AT3G04650.1	0	AT3g04650/F7O18_13 [Source:UniProtKB/TrEMBL;Acc:Q9SR09]	REFNigelle_006018.p1	Aqcoe5G037300.2.p	0	AT3G04650.1	FAD/NAD(P)-binding oxidoreductase family protein
RN_006052	0.541932679328779	0.343803678076441	-	REFNigelle_006052.p1	AT4G17940.1	5.38e-42	Tetratricopeptide repeat (TPR)-like superfamily protein [Source:UniProtKB/TrEMBL;Acc:Q0WUZ1]	REFNigelle_006052.p1	Aqcoe3G220900.1.p	4e-75	AT4G17940.1	Tetratricopeptide repeat (TPR)-like superfamily protein
RN_006069	-1.02389985971621	-0.589713532081886	0.954102911060373	#N/A	#N/A	#N/A	#N/A	#N/A	#N/A	#N/A	#N/A	#N/A
RN_006074	0.403042409815884	0.187076682905792	-	REFNigelle_006074.p1	AT5G06530.2	0	ABCG22 description:ABC transporter G family member 22 [Source:Q93YS4]	REFNigelle_006074.p1	Aqcoe1G073500.1.p	0	AT5G06530.2	ABC-2 type transporter family protein
RN_006080	0.587515811780257	2.22412269384044	-	#N/A	#N/A	#N/A	#N/A	#N/A	#N/A	#N/A	#N/A	#N/A
RN_006083	0.391005914691029	0.491878143026118	-	#N/A	#N/A	#N/A	#N/A	#N/A	#N/A	#N/A	#N/A	#N/A
RN_006089	-1.09292405874441	-0.533097596380677	-0.84773468558903	#N/A	#N/A	#N/A	#N/A	REFNigelle_006089.p3	Aqcoe7G266000.1.p	1e-09	0	0
RN_006106	-1.30451268099065	0.316756907196688	-	REFNigelle_006106.p1	AT1G60060.1	5.48e-139	Serine/threonine-protein kinase WNK (With No Lysine)-like protein [Source:UniProtKB/TrEMBL;Acc:Q9ZUI7]	REFNigelle_006106.p1	Aqcoe3G300900.2.p	0	AT1G60060.1	Serine/threonine-protein kinase WNK (With No Lysine)-related
RN_006119	-1.46773414036335	-1.95192578624478	-	#N/A	#N/A	#N/A	#N/A	#N/A	#N/A	#N/A	#N/A	#N/A
RN_006128	-0.321330671739472	-1.29234347107077	0.97254239423401	#N/A	#N/A	#N/A	#N/A	#N/A	#N/A	#N/A	#N/A	#N/A
RN_006130	1.50269486810906	2.02734378126685	-	#N/A	#N/A	#N/A	#N/A	#N/A	#N/A	#N/A	#N/A	#N/A
RN_006132	0.805511034540533	0.521365930109918	-	#N/A	#N/A	#N/A	#N/A	#N/A	#N/A	#N/A	#N/A	#N/A
RN_006140	-0.2521022094614	-0.111772008059441	-	REFNigelle_006140.p1	AT4G34710.2	0	ADC2 description:Arginine decarboxylase 2 [Source:O23141]	REFNigelle_006140.p1	Aqcoe5G177400.1.p	0	AT4G34710.2	arginine decarboxylase 2
RN_006159	0.0873899417312682	-0.548763251165587	-	REFNigelle_006159.p3	AT1G26255.4	7.6e-05	::protein_coding	REFNigelle_006159.p1	Aqcoe1G233300.1.p	1e-13	AT1G26820.1	ribonuclease 3
RN_006192	1.10244251116417	0.561446542109604	-	#N/A	#N/A	#N/A	#N/A	#N/A	#N/A	#N/A	#N/A	#N/A
RN_006197	1.71096120491066	2.42037272057668	-	#N/A	#N/A	#N/A	#N/A	#N/A	#N/A	#N/A	#N/A	#N/A
RN_006255	0.706182949994774	0.562190094778382	-	#N/A	#N/A	#N/A	#N/A	#N/A	#N/A	#N/A	#N/A	#N/A
RN_006263	1.15731278675903	0.725366548092249	-	#N/A	#N/A	#N/A	#N/A	#N/A	#N/A	#N/A	#N/A	#N/A
RN_006292	1.22571329061482	0.888602799956161	-	#N/A	#N/A	#N/A	#N/A	#N/A	#N/A	#N/A	#N/A	#N/A
RN_006320	1.44876367031253	3.12899217968107	-	REFNigelle_006320.p1	AT3G23120.1	1.69e-09	AtRLP38 description:Receptor-like protein 38 [Source:Q9LS79]	REFNigelle_006320.p1	Aqcoe1G502400.1.p	0.0005	AT1G71400.1	receptor like protein 12
RN_006346	0.543038198118122	1.05943893682291	-	#N/A	#N/A	#N/A	#N/A	#N/A	#N/A	#N/A	#N/A	#N/A
RN_006355	0.546619500097563	1.21530174339707	-	REFNigelle_006355.p2	AT2G28210.2	6.38e-12	ATACA2 description:ATACA2 [Source:A0A178VW72]	REFNigelle_006355.p2	Aqcoe1G139200.1.p	4e-16	AT1G08080.1	alpha carbonic anhydrase 7
RN_006419	-0.385113053458045	-0.660827863075425	-	REFNigelle_006419.p1	AT3G13020.1	3.79e-109	HAT transposon superfamily protein [Source:UniProtKB/TrEMBL;Acc:Q9LDK4]	REFNigelle_006419.p1	Aqcoe7G073800.1.p	3e-60	AT4G12300.1	cytochrome P450, family 706, subfamily A, polypeptide 4
RN_006429	0.805891581598101	0.902727030853996	-	#N/A	#N/A	#N/A	#N/A	#N/A	#N/A	#N/A	#N/A	#N/A
RN_006437	1.42948559022428	1.933764978373	-	REFNigelle_006437.p1	AT5G39390.1	1.02e-59	Leucine-rich repeat protein kinase family protein [Source:UniProtKB/TrEMBL;Acc:F4KEF0]	REFNigelle_006437.p1	Aqcoe7G298000.1.p	4e-93	AT3G47110.1	Leucine-rich repeat protein kinase family protein
RN_006469	0.658380735287425	0.627475118250894	-	REFNigelle_006469.p1	AT1G63200.1	1.28e-07	Cystatin/monellin superfamily protein [Source:UniProtKB/TrEMBL;Acc:Q9CAM3]	#N/A	#N/A	#N/A	#N/A	#N/A
RN_006474	-0.952054293864905	-0.153746603983909	-	#N/A	#N/A	#N/A	#N/A	#N/A	#N/A	#N/A	#N/A	#N/A
RN_006487	-0.524885501494058	-0.783056725927588	-	#N/A	#N/A	#N/A	#N/A	#N/A	#N/A	#N/A	#N/A	#N/A
RN_006488	-0.301519777281496	-0.47544158832536	-	REFNigelle_006488.p1	AT4G12500.1	1.73e-18	pEARLI1-like lipid transfer protein 3 [Source:UniProtKB/Swiss-Prot;Acc:Q9SU33]	REFNigelle_006488.p1	Aqcoe6G315000.1.p	7e-28	AT2G45180.1	Bifunctional inhibitor/lipid-transfer protein/seed storage 2S albumin superfamily protein
RN_006514	-1.41076158767935	-0.269998464748376	-	#N/A	#N/A	#N/A	#N/A	#N/A	#N/A	#N/A	#N/A	#N/A
RN_006531	0.425099944973128	0.402991593612953	-	#N/A	#N/A	#N/A	#N/A	#N/A	#N/A	#N/A	#N/A	#N/A
RN_006543	0.246481093678814	0.476040307061712	-	REFNigelle_006543.p1	AT3G08750.1	6.24e-20	F-box protein At3g08750 [Source:UniProtKB/Swiss-Prot;Acc:Q9C9Y4]	REFNigelle_006543.p1	Aqcoe6G200600.1.p	7e-32	AT3G06240.1	F-box family protein
RN_006564	0.0206288378535366	-0.286171000983688	-	REFNigelle_006564.p1	AT1G29930.1	8.08e-170	LHCB1.3 description:Chlorophyll a-b binding protein 1, chloroplastic [Source:P04778]	REFNigelle_006564.p1	Aqcoe1G200700.1.p	3e-175	AT1G29930.1	chlorophyll A/B binding protein 1
RN_006575	0.842075781514624	1.00995976675497	-	REFNigelle_006575.p1	AT3G46580.1	5.33e-08	MBD5 description:Methyl-CpG-binding domain-containing protein 5 [Source:Q9SNC0]	REFNigelle_006575.p1	Aqcoe7G040100.2.p	8e-10	AT5G52230.1	methyl-CPG-binding domain protein 13
RN_006611	-0.0301849346584137	-0.987507765737982	-	REFNigelle_006611.p1	AT1G05490.1	0	CLSY3 description:SNF2 domain-containing protein CLASSY 3 [Source:F4I8S3]	REFNigelle_006611.p1	Aqcoe2G407500.1.p	0	AT1G05490.1	chromatin remodeling 31
RN_006621	2.94581435329412	2.31373034558211		#N/A	#N/A	#N/A	#N/A	#N/A	#N/A	#N/A	#N/A	#N/A
RN_006658	-0.269107682673239	-0.82383332204408	-	REFNigelle_006658.p1	AT4G40040.1	9.98e-43	HTR4 description:Histone H3.3 [Source:P59169]	REFNigelle_006658.p1	Aqcoe1G063900.1.p	1e-38	AT5G10390.1	Histone superfamily protein
RN_006659	0.533093717266685	1.07160119584706	-	#N/A	#N/A	#N/A	#N/A	#N/A	#N/A	#N/A	#N/A	#N/A
RN_006671	0.14359995576433	0.776597299577972	-	REFNigelle_006671.p1	AT2G26660.1	3.05e-30	SPX2 description:SPX domain-containing protein 2 [Source:O48781]	REFNigelle_006671.p1	Aqcoe7G388700.1.p	9e-40	AT5G20150.1	SPX domain gene 1
RN_006703	-0.106713018351864	0.917352187856722	-	#N/A	#N/A	#N/A	#N/A	#N/A	#N/A	#N/A	#N/A	#N/A
RN_006714	0.563219738842188	0.346529074925427	-	REFNigelle_006714.p1	AT3G45140.1	0	LOX2 description:Lipoxygenase 2, chloroplastic [Source:P38418]	REFNigelle_006714.p1	Aqcoe1G020300.1.p	0	AT3G45140.1	lipoxygenase 2
RN_006754	0.239902077356007	1.03542729722283	-	#N/A	#N/A	#N/A	#N/A	#N/A	#N/A	#N/A	#N/A	#N/A
RN_006807	-0.228596704836283	-0.169830261014434	-	REFNigelle_006807.p1	AT5G28770.2	1.25e-60	BZIP63 description:Basic leucine zipper 63 [Source:B9DGI8]	REFNigelle_006807.p1	Aqcoe5G043300.1.p	8e-137	AT5G28770.2	bZIP transcription factor family protein
RN_006810	-0.424560894249041	-0.427882978834097	-	REFNigelle_006810.p1	AT3G62760.1	3.41e-92	GSTF13 description:Glutathione S-transferase F13 [Source:Q9LZI9]	REFNigelle_006810.p1	Aqcoe2G303700.2.p	3e-129	AT3G62760.1	Glutathione S-transferase family protein
RN_006841	0.960958093095876	1.76440914982801	-	#N/A	#N/A	#N/A	#N/A	#N/A	#N/A	#N/A	#N/A	#N/A
RN_006844	0.398186822407894	0.387346089294456	-	#N/A	#N/A	#N/A	#N/A	#N/A	#N/A	#N/A	#N/A	#N/A
RN_006847	1.28732685335103	1.0958406640771	-	#N/A	#N/A	#N/A	#N/A	#N/A	#N/A	#N/A	#N/A	#N/A
RN_006853	0.136782565952674	0.350484014615726	-	REFNigelle_006853.p1	AT5G27660.2	9.35e-16	Trypsin family protein with PDZ domain-containing protein [Source:UniProtKB/TrEMBL;Acc:A0A1P8BBM9]	REFNigelle_006853.p1	Aqcoe2G303200.1.p	2e-14	AT5G27660.1	Trypsin family protein with PDZ domain
RN_006913	-0.148620347751876	-0.401849675123389	-	REFNigelle_006913.p1	AT5G41980.1	1.2e-67	At5g41980 [Source:UniProtKB/TrEMBL;Acc:Q9FHY5]	REFNigelle_006913.p4	Aqcoe2G254200.1.p	1e-14	AT4G21380.1	receptor kinase 3
RN_006914	0.378733479673011	0.857324930344152	-	#N/A	#N/A	#N/A	#N/A	#N/A	#N/A	#N/A	#N/A	#N/A
RN_006916	0.426035215396388	0.517213703481176	-	#N/A	#N/A	#N/A	#N/A	#N/A	#N/A	#N/A	#N/A	#N/A
RN_006949	0.812734295350792	0.837347130841243	-	REFNigelle_006949.p1	AT5G18880.1	1.17e-16	RNA-directed DNA polymerase (Reverse transcriptase)-related family protein [Source:UniProtKB/TrEMBL;Acc:Q3E9D7]	REFNigelle_006949.p1	Aqcoe3G131700.1.p	3e-27	AT1G60720.1	RNA-directed DNA polymerase (reverse transcriptase)-related family protein
RN_006954	0.434166631912882	0.590542000429195	-	#N/A	#N/A	#N/A	#N/A	#N/A	#N/A	#N/A	#N/A	#N/A
RN_006969	0.349873472960019	0.737513043527461	-	#N/A	#N/A	#N/A	#N/A	#N/A	#N/A	#N/A	#N/A	#N/A
RN_006991	0.306164161039281	0.520377200473102	-	#N/A	#N/A	#N/A	#N/A	#N/A	#N/A	#N/A	#N/A	#N/A
RN_007017	0.80936538386581	1.48464296985033	-	#N/A	#N/A	#N/A	#N/A	#N/A	#N/A	#N/A	#N/A	#N/A
RN_007075	-1.73701613635385	-3.47726529106438	0.8813190151433	REFNigelle_007075.p4	AT3G24255.1	2.43e-07	RNA-directed DNA polymerase (Reverse transcriptase)-related family protein [Source:UniProtKB/TrEMBL;Acc:A0A1I9LSY4]	#N/A	#N/A	#N/A	#N/A	#N/A
RN_007080	1.85234560007079	2.64655561187154	-	#N/A	#N/A	#N/A	#N/A	#N/A	#N/A	#N/A	#N/A	#N/A
RN_007081	-0.658294816574007	-0.437345243744169	-	#N/A	#N/A	#N/A	#N/A	#N/A	#N/A	#N/A	#N/A	#N/A
RN_007091	-0.926422234039904	-1.74087419281926	-	#N/A	#N/A	#N/A	#N/A	#N/A	#N/A	#N/A	#N/A	#N/A
RN_007153	-0.59401667962354	-0.567203607873364	-	#N/A	#N/A	#N/A	#N/A	#N/A	#N/A	#N/A	#N/A	#N/A
RN_007182	0.503219183124761	0.496784832879498	-	#N/A	#N/A	#N/A	#N/A	#N/A	#N/A	#N/A	#N/A	#N/A
RN_007183	1.05616981305425	1.32028488726174	-	#N/A	#N/A	#N/A	#N/A	#N/A	#N/A	#N/A	#N/A	#N/A
RN_007205	1.0509408699384	0.728926627774199	-	REFNigelle_007205.p1	AT3G21250.2	0	MRP6 description:Multidrug resistance-associated protein 6 [Source:A0A1I9LPV5]	REFNigelle_007205.p1	Aqcoe7G413500.2.p	0	AT3G21250.2	multidrug resistance-associated protein 6
RN_007213	0.530860646330506	0.651173655775746	-	#N/A	#N/A	#N/A	#N/A	#N/A	#N/A	#N/A	#N/A	#N/A
RN_007219	1.17901349014177	1.60513294616838	-	#N/A	#N/A	#N/A	#N/A	#N/A	#N/A	#N/A	#N/A	#N/A
RN_007256	0.256949178637131	1.34538804368473	-	REFNigelle_007256.p1	AT5G08780.1	2.64e-13	At5g08780 [Source:UniProtKB/TrEMBL;Acc:Q6AWW7]	REFNigelle_007256.p1	Aqcoe7G394400.1.p	3e-48	AT1G21000.1	PLATZ transcription factor family protein
RN_007302	-0.804124920371945	-1.45740720970338	-	#N/A	#N/A	#N/A	#N/A	#N/A	#N/A	#N/A	#N/A	#N/A
RN_007307	0.632442827345663	1.19016057162921	-	#N/A	#N/A	#N/A	#N/A	#N/A	#N/A	#N/A	#N/A	#N/A
RN_007333	0.686931988896692	0.83193068839195	-	#N/A	#N/A	#N/A	#N/A	#N/A	#N/A	#N/A	#N/A	#N/A
RN_007343	0.625515464108714	0.876296446151168	-	REFNigelle_007343.p1	AT3G62260.3	2.17e-27	Probable protein phosphatase 2C 49 [Source:UniProtKB/Swiss-Prot;Acc:Q3EAF9]	REFNigelle_007343.p1	Aqcoe2G260900.1.p	7e-38	AT3G62260.1	Protein phosphatase 2C family protein
RN_007361	1.93995362005321	1.58314846378352	-	#N/A	#N/A	#N/A	#N/A	#N/A	#N/A	#N/A	#N/A	#N/A
RN_007370	1.22093962700214	1.67260797421088	-	#N/A	#N/A	#N/A	#N/A	#N/A	#N/A	#N/A	#N/A	#N/A
RN_007407	0.447598389492146	0.558765070422575	-	REFNigelle_007407.p1	AT1G43730.1	1.1e-07	RNA-directed DNA polymerase (Reverse transcriptase)-related family protein [Source:UniProtKB/TrEMBL;Acc:F4ICS7]	REFNigelle_007407.p1	Aqcoe3G174500.1.p	1e-10	AT3G09510.1	Ribonuclease H-like superfamily protein
RN_007468	-0.238863613870077	-0.540351582998834	-	#N/A	#N/A	#N/A	#N/A	REFNigelle_007468.p5	Aqcoe3G196800.1.p	7e-17	0	0
RN_007480	0.127133373837402	0.432668155544636	-	REFNigelle_007480.p1	AT4G23160.2	4.43e-123	CRK8 description:cysteine-rich RLK (RECEPTOR-like protein kinase) 8 [Source:AT4G23160]	REFNigelle_007480.p3	Aqcoe6G260400.1.p	2e-15	AT4G29090.1	Ribonuclease H-like superfamily protein
RN_007485	0.518721377922034	0.561183065476189	-	REFNigelle_007485.p1	AT2G27120.3	7.29e-26	POL2B description:DNA polymerase epsilon catalytic subunit [Source:AT2G27120]	REFNigelle_007485.p1	Aqcoe2G131900.1.p	4e-27	AT1G08260.1	DNA polymerase epsilon catalytic subunit
RN_007501	0.695526832044179	0.749033669023607	-	REFNigelle_007501.p1	AT5G36910.1	4.09e-19	THI2.2 description:At5g36910 [Source:A6QRC1]	REFNigelle_007501.p1	Aqcoe4G073300.1.p	7e-27	AT1G66100.1	Plant thionin
RN_007505	-1.34912361192569	-2.16846517669588	-	REFNigelle_007505.p1	AT3G42170.1	2.75e-15	HAT description:DAYSLEEPER [Source:A0A178VJS5]	REFNigelle_007505.p1	Aqcoe4G147500.1.p	3e-11	AT5G26570.1	catalytics;carbohydrate kinases;phosphoglucan, water dikinases
RN_007540	-0.0775526840869264	-0.39909955357079	-	#N/A	#N/A	#N/A	#N/A	#N/A	#N/A	#N/A	#N/A	#N/A
RN_007548	-1.6403592055637	-2.93783029613277	-	#N/A	#N/A	#N/A	#N/A	#N/A	#N/A	#N/A	#N/A	#N/A
RN_007586	-0.0763624431271398	-0.496702036662268	-	REFNigelle_007586.p1	AT3G26120.1	2.51e-85	TEL1 description:Terminal EAR1-like 1 [Source:F4JBE2]	REFNigelle_007586.p1	Aqcoe3G136200.1.p	2e-111	AT1G67770.1	terminal EAR1-like 2
RN_007590	0.762652323783835	0.660155254586072	-	#N/A	#N/A	#N/A	#N/A	#N/A	#N/A	#N/A	#N/A	#N/A
RN_007619	0.968646234367812	1.0669616005497	-	#N/A	#N/A	#N/A	#N/A	#N/A	#N/A	#N/A	#N/A	#N/A
RN_007621	0.455929762529048	0.376675042971388	-	#N/A	#N/A	#N/A	#N/A	#N/A	#N/A	#N/A	#N/A	#N/A
RN_007627	0.115408575778244	0.387126375158782	-	#N/A	#N/A	#N/A	#N/A	#N/A	#N/A	#N/A	#N/A	#N/A
RN_007669	-1.09874340550804	-0.822315867538098	-	#N/A	#N/A	#N/A	#N/A	#N/A	#N/A	#N/A	#N/A	#N/A
RN_007670	-1.00648411458597	-0.667565767727801	0.896274702596487	#N/A	#N/A	#N/A	#N/A	#N/A	#N/A	#N/A	#N/A	#N/A
RN_007770	0.561827960332148	1.18957345570845	-	#N/A	#N/A	#N/A	#N/A	#N/A	#N/A	#N/A	#N/A	#N/A
RN_007838	-0.105990070416976	-0.249592938981317	-	REFNigelle_007838.p1	AT5G14490.2	3.72e-93	anac085 description:NAC domain containing protein 85 [Source:AT5G14490]	REFNigelle_007838.p1	Aqcoe3G142100.2.p	1e-173	AT5G14490.1	NAC domain containing protein 85
RN_007910	0.719727562527131	0.480428120900436	-	#N/A	#N/A	#N/A	#N/A	#N/A	#N/A	#N/A	#N/A	#N/A
RN_007939	-0.656560141762532	-0.541724495532441	-	REFNigelle_007939.p1	AT1G59940.1	1.5e-71	ARR3 description:response regulator 3 [Source:AT1G59940]	REFNigelle_007939.p1	Aqcoe3G311200.1.p	5e-89	AT5G62920.1	response regulator 6
RN_007977	0.507060957635195	0.410625754665413	-	#N/A	#N/A	#N/A	#N/A	#N/A	#N/A	#N/A	#N/A	#N/A
RN_008012	0.370876718376589	-1.27286314169341	-	REFNigelle_008012.p1	AT5G13790.2	1.46e-75	AGL15 description:AGL15 [Source:A0A178UBU5]	REFNigelle_008012.p1	Aqcoe1G036400.1.p	3e-149	AT5G13790.1	AGAMOUS-like 15
RN_008056	-0.014005879317404	0.598662976071821	-	#N/A	#N/A	#N/A	#N/A	#N/A	#N/A	#N/A	#N/A	#N/A
RN_008212	0.351434612573775	1.05621783519762	-	#N/A	#N/A	#N/A	#N/A	#N/A	#N/A	#N/A	#N/A	#N/A
RN_008288	1.01251664711011	0.393013568804414	-	REFNigelle_008288.p1	AT3G21420.1	0	2-oxoglutarate (2OG) and Fe(II)-dependent oxygenase superfamily protein [Source:UniProtKB/TrEMBL;Acc:Q9LIF4]	REFNigelle_008288.p1	Aqcoe2G306300.1.p	0	AT3G21420.1	2-oxoglutarate (2OG) and Fe(II)-dependent oxygenase superfamily protein
RN_008345	-0.385308219177524	0.372539389214318	-	#N/A	#N/A	#N/A	#N/A	#N/A	#N/A	#N/A	#N/A	#N/A
RN_008644	1.65313362959476	1.93081983026162	-	#N/A	#N/A	#N/A	#N/A	#N/A	#N/A	#N/A	#N/A	#N/A
RN_008675	1.74508859307038	2.8238451361082	-	#N/A	#N/A	#N/A	#N/A	#N/A	#N/A	#N/A	#N/A	#N/A
RN_008689	0.00475575667744428	-0.267682447229919	-	REFNigelle_008689.p1	AT5G23570.1	0	SGS3 description:Protein SUPPRESSOR OF GENE SILENCING 3 [Source:Q9LDX1]	REFNigelle_008689.p1	Aqcoe6G004500.1.p	0	AT5G23570.1	XS domain-containing protein / XS zinc finger domain-containing protein-related
RN_008690	1.96330487390248	0.427888022648506	-	REFNigelle_008690.p1	AT2G30890.1	6.47e-67	Cytochrome b561 domain-containing protein At2g30890 [Source:UniProtKB/Swiss-Prot;Acc:O80854]	REFNigelle_008690.p1	Aqcoe1G193200.1.p	4e-85	AT4G18260.1	Cytochrome b561/ferric reductase transmembrane protein family
RN_008747	-0.184056827649648	0.809515114550496	-	REFNigelle_008747.p1	AT4G33355.1	1.8e-30	LTP11 description:Non-specific lipid-transfer protein 11 [Source:Q2V3C1]	REFNigelle_008747.p1	Aqcoe1G403100.1.p	2e-37	AT5G59310.1	lipid transfer protein 4
RN_009137	1.21047520708558	0.81027409382901	0.860525033017938	#N/A	#N/A	#N/A	#N/A	REFNigelle_009137.p1	Aqcoe6G207800.1.p	1e-13	ATMG00310.1	RNA-directed DNA polymerase (reverse transcriptase)-related family protein
RN_009142	2.53758767630862	1.34601605977296	-	#N/A	#N/A	#N/A	#N/A	#N/A	#N/A	#N/A	#N/A	#N/A
RN_009202	-0.150727496871668	-0.23614414920693	-	REFNigelle_009202.p1	AT1G02730.1	0	CSLD5 description:Cellulose synthase-like protein D5 [Source:Q9SRW9]	REFNigelle_009202.p1	Aqcoe2G282400.1.p	0	AT1G02730.1	cellulose synthase-like D5
RN_009340	-1.30914446668388	-0.445508243797374	-	REFNigelle_009340.p1	AT3G16360.2	4.8e-71	AHP4 description:AHP4 [Source:A0A178V965]	REFNigelle_009340.p1	Aqcoe7G149700.1.p	1e-78	AT3G16360.2	HPT phosphotransmitter 4
RN_009462	-0.1975133806381	-0.184016278200582	-	REFNigelle_009462.p1	AT4G37450.1	2.36e-08	AGP18 description:arabinogalactan protein 18 [Source:AT4G37450]	#N/A	#N/A	#N/A	#N/A	#N/A
RN_009542	0.114844284931391	0.693957800632786	-	REFNigelle_009542.p1	AT2G33205.1	1.71e-149	Serinc-domain containing serine and sphingolipid biosynthesis protein [Source:TAIR;Acc:AT2G33205]	REFNigelle_009542.p1	Aqcoe2G392600.3.p	0	AT2G33205.1	Serinc-domain containing serine and sphingolipid biosynthesis protein
RN_009682	0.729926045633831	0.457484785331875	-	#N/A	#N/A	#N/A	#N/A	#N/A	#N/A	#N/A	#N/A	#N/A
RN_009695	-0.403610905149929	-0.201739579522751	-	REFNigelle_009695.p1	AT1G72330.1	0	ALAAT2 description:alanine aminotransferase 2 [Source:AT1G72330]	REFNigelle_009695.p1	Aqcoe7G101400.2.p	0	AT1G72330.1	alanine aminotransferase 2
RN_009717	-1.81467054567792	-1.80270239708586	-	#N/A	#N/A	#N/A	#N/A	#N/A	#N/A	#N/A	#N/A	#N/A
RN_009719	-2.42065799249794	-2.76690154265156	-	#N/A	#N/A	#N/A	#N/A	#N/A	#N/A	#N/A	#N/A	#N/A
RN_009727	-0.153201594990288	-0.246450921731903	-	REFNigelle_009727.p1	AT5G46740.1	1.19e-113	UBP21 description:Ubiquitin carboxyl-terminal hydrolase 21 [Source:Q9FIQ1]	REFNigelle_009727.p1	Aqcoe3G234100.1.p	0	AT5G46740.1	ubiquitin-specific protease 21
RN_009789	0.117643605519681	0.879361305295473	-	#N/A	#N/A	#N/A	#N/A	#N/A	#N/A	#N/A	#N/A	#N/A
RN_009840	-0.62026061777119	-1.31380345582991	-	#N/A	#N/A	#N/A	#N/A	#N/A	#N/A	#N/A	#N/A	#N/A
RN_010019	1.18651471553435	1.19718700509395	-	REFNigelle_010019.p1	AT1G78780.3	5.18e-70	pathogenesis-related family protein [Source:TAIR;Acc:AT1G78780]	REFNigelle_010019.p1	Aqcoe5G190700.1.p	3e-116	AT1G78780.2	pathogenesis-related family protein
RN_010026	0.0487893796024793	-0.236194728687069	-	REFNigelle_010026.p1	AT1G02840.1	1.11e-49	SR34 description:Serine/arginine-rich-splicing factor SR34 [Source:O22315]	REFNigelle_010026.p1	Aqcoe5G088100.7.p	4e-57	AT1G02840.3	RNA-binding (RRM/RBD/RNP motifs) family protein
RN_010091	0.00262931021056476	-0.419183757501087	-	REFNigelle_010091.p1	AT5G54270.1	3.91e-171	LHCB3 description:Chlorophyll a-b binding protein 3, chloroplastic [Source:Q9S7M0]	REFNigelle_010091.p1	Aqcoe1G308700.1.p	4e-166	AT5G54270.1	light-harvesting chlorophyll B-binding protein 3
RN_010168	0.598813062032583	0.286138818840935	-	REFNigelle_010168.p1	AT1G08470.1	8.67e-133	SSL3 description:SSL3 [Source:A0A178WK70]	REFNigelle_010168.p1	Aqcoe2G070000.2.p	4e-156	AT1G08470.1	strictosidine synthase-like 3
RN_010270	0.270358817113532	0.362560132332518	-	#N/A	#N/A	#N/A	#N/A	#N/A	#N/A	#N/A	#N/A	#N/A
RN_010324	2.48773141584383	-1.31850207024088	-	REFNigelle_010324.p1	AT1G61810.1	0	BGLU45 description:Beta-glucosidase 45 [Source:F4HVG0]	REFNigelle_010324.p1	Aqcoe4G237600.1.p	0	AT1G61810.1	beta-glucosidase 45
RN_010479	0.0628125168782545	-0.657083095201762	-	REFNigelle_010479.p1	AT5G25120.1	1.13e-158	CYP71B11 description:Cytochrome P450 71B11 [Source:P58049]	REFNigelle_010479.p1	Aqcoe5G394300.1.p	0	AT3G48270.1	cytochrome P450, family 71, subfamily A, polypeptide 26
RN_010481	0.793674113125198	0.0898087951296688	-	REFNigelle_010481.p1	AT5G24130.1	2.07e-112	At5g24130 [Source:UniProtKB/TrEMBL;Acc:Q9FL61]	REFNigelle_010481.p1	Aqcoe7G014000.1.p	1e-154	AT5G24130.1	0
RN_010555	0.139736987719474	0.161418301293299	-	#N/A	#N/A	#N/A	#N/A	#N/A	#N/A	#N/A	#N/A	#N/A
RN_010666	-0.0517955644999949	-0.247061839420672	-	REFNigelle_010666.p1	AT5G66230.1	8.97e-70	Chalcone-flavonone isomerase family protein [Source:UniProtKB/TrEMBL;Acc:F4JZ53]	REFNigelle_010666.p1	Aqcoe6G208500.1.p	3e-90	AT5G66230.1	Chalcone-flavanone isomerase family protein
RN_010729	0.935428168244128	0.510367361811597	-	#N/A	#N/A	#N/A	#N/A	REFNigelle_010729.p1	Aqcoe3G375400.1.p	2e-11	0	0
RN_010732	-0.305547553206169	-0.349947947644816	-	REFNigelle_010732.p1	AT2G36110.1	7.74e-09	Polynucleotidyl transferase, ribonuclease H-like superfamily protein [Source:UniProtKB/TrEMBL;Acc:Q9SIH3]	REFNigelle_010732.p1	Aqcoe2G257900.1.p	1e-57	AT3G12470.1	Polynucleotidyl transferase, ribonuclease H-like superfamily protein
RN_010757	0.815895553466259	0.663343481359224	-	REFNigelle_010757.p1	AT4G10720.1	4.11e-59	Ankyrin repeat family protein [Source:UniProtKB/TrEMBL;Acc:Q4V397]	REFNigelle_010757.p1	Aqcoe6G112400.1.p	7e-56	AT4G10720.1	Ankyrin repeat family protein
RN_010800	1.57851623060874	2.02361022327862	-	#N/A	#N/A	#N/A	#N/A	#N/A	#N/A	#N/A	#N/A	#N/A
RN_011166	0.169307205061868	0.339132856078867	-	REFNigelle_011166.p1	AT2G47140.1	2.14e-92	SDR3B description:Short-chain dehydrogenase reductase 3b [Source:Q94K41]	REFNigelle_011166.p1	Aqcoe3G325300.1.p	5e-138	AT2G47140.1	NAD(P)-binding Rossmann-fold superfamily protein
RN_011183	-0.173600276251524	-0.145719209666945	-	REFNigelle_011183.p1	AT3G51280.1	0	Protein POLLENLESS 3-LIKE 2 [Source:UniProtKB/Swiss-Prot;Acc:Q9SD20]	REFNigelle_011183.p1	Aqcoe6G223500.1.p	0	AT3G51280.1	Tetratricopeptide repeat (TPR)-like superfamily protein
RN_011190	-0.479556303056492	-0.255844223022983	-	#N/A	#N/A	#N/A	#N/A	#N/A	#N/A	#N/A	#N/A	#N/A
RN_011257	-4.40592135293302	-2.0665525588325	-	REFNigelle_011257.p1	AT3G23610.5	1.46e-23	DSPTP1 description:dual specificity protein phosphatase 1 [Source:AT3G23610]	REFNigelle_011257.p1	Aqcoe2G048100.1.p	1e-79	AT4G18593.1	dual specificity protein phosphatase-related
RN_011492	0.168860241371535	0.28648098963336	-	#N/A	#N/A	#N/A	#N/A	#N/A	#N/A	#N/A	#N/A	#N/A
RN_011637	1.95682723238287	2.23581279281881	-	#N/A	#N/A	#N/A	#N/A	#N/A	#N/A	#N/A	#N/A	#N/A
RN_011706	-0.212978977690085	-0.25753149445656	-	REFNigelle_011706.p1	AT5G11810.1	1.38e-103	At5g11810 [Source:UniProtKB/TrEMBL;Acc:Q9LYF0]	REFNigelle_011706.p1	Aqcoe5G154900.1.p	5e-141	AT5G11810.1	0
RN_011737	-0.0424447486316063	-0.286049600621572	-	REFNigelle_011737.p1	AT3G10410.1	0	SCPL49 description:Carboxypeptidase [Source:A0A178VKH6]	REFNigelle_011737.p1	Aqcoe2G206300.1.p	0	AT3G10410.1	SERINE CARBOXYPEPTIDASE-LIKE 49
RN_011789	-0.249039336867278	0.0650694055749366	-	REFNigelle_011789.p1	AT1G29900.1	0	CARB description:Carbamoyl-phosphate synthase large chain, chloroplastic [Source:Q42601]	REFNigelle_011789.p1	Aqcoe7G106200.3.p	0	AT1G29900.1	carbamoyl phosphate synthetase B
RN_011922	1.40318255913463	1.53196779528655	-	#N/A	#N/A	#N/A	#N/A	#N/A	#N/A	#N/A	#N/A	#N/A
RN_011994	-1.5979901191147	-0.298550093416244	-	REFNigelle_011994.p1	AT3G57040.1	5.64e-77	ARR9 description:Two-component response regulator ARR9 [Source:O80366]	REFNigelle_011994.p1	Aqcoe1G041400.1.p	1e-90	AT2G41310.1	response regulator 3
RN_012034	1.08158576553174	0.807962049194489	-	#N/A	#N/A	#N/A	#N/A	#N/A	#N/A	#N/A	#N/A	#N/A
RN_012090	-3.13101695670468	12	-	REFNigelle_012090.p1	AT3G56970.1	1.19e-13	ORG2 description:Transcription factor ORG2 [Source:Q9M1K1]	REFNigelle_012090.p1	Aqcoe2G040100.1.p	4e-32	AT3G56970.1	basic helix-loop-helix (bHLH) DNA-binding superfamily protein
RN_012123	0.653039381377337	1.09819249779207	-	#N/A	#N/A	#N/A	#N/A	#N/A	#N/A	#N/A	#N/A	#N/A
RN_012166	-0.475425960553516	-1.1168302364564	-	#N/A	#N/A	#N/A	#N/A	REFNigelle_012166.p1	Aqcoe5G264300.1.p	0.0007	AT5G21140.1	embryo defective 1379
RN_012191	-0.715533062334039	-1.3793714686635	0.995297078478115	#N/A	#N/A	#N/A	#N/A	#N/A	#N/A	#N/A	#N/A	#N/A
RN_012192	-1.36723997513701	-1.43061655915921	0.979415606854541	#N/A	#N/A	#N/A	#N/A	#N/A	#N/A	#N/A	#N/A	#N/A
RN_012408	1.71241584823614	1.26507480134497	-	#N/A	#N/A	#N/A	#N/A	#N/A	#N/A	#N/A	#N/A	#N/A
RN_012432	0.220719631922475	1.42903040500166	-	#N/A	#N/A	#N/A	#N/A	#N/A	#N/A	#N/A	#N/A	#N/A
RN_012548	0.14510862269116	0.861239070919632	-	REFNigelle_012548.p1	AT1G27920.1	1.13e-151	MAP65-8 description:65-kDa microtubule-associated protein 8 [Source:Q9C7G0]	REFNigelle_012548.p1	Aqcoe3G096400.1.p	0	AT1G27920.1	microtubule-associated protein 65-8
RN_012589	-0.945740249580327	0.300350891685895	-	REFNigelle_012589.p1	AT2G16090.1	0	ARI2 description:Probable E3 ubiquitin-protein ligase ARI2 [Source:Q84RR2]	REFNigelle_012589.p1	Aqcoe5G202300.1.p	0	AT2G16090.1	RING/U-box superfamily protein
RN_012611	0.547588020247868	0.488307645436011	-	REFNigelle_012611.p1	AT2G23690.1	4.11e-41	HTH-type transcriptional regulator [Source:UniProtKB/TrEMBL;Acc:Q680G2]	REFNigelle_012611.p1	Aqcoe6G104900.1.p	1e-44	AT4G37240.1	0
RN_012862	0.310597086247784	-0.298658369091746	-	#N/A	#N/A	#N/A	#N/A	REFNigelle_012862.p1	Aqcoe3G233500.4.p	4e-05	0	0
RN_012928	-0.246543588661162	0.0620904391422756	-	REFNigelle_012928.p1	AT3G54090.1	0	FLN1 description:Fructokinase-like 1, chloroplastic [Source:Q9M394]	REFNigelle_012928.p1	Aqcoe1G089400.1.p	0	AT3G54090.1	fructokinase-like 1
RN_012974	0.72682510753007	0.888035703629115	-	#N/A	#N/A	#N/A	#N/A	#N/A	#N/A	#N/A	#N/A	#N/A
RN_013044	0.829370956897123	0.93997474215599	-	REFNigelle_013044.p1	AT5G18610.1	2.03e-153	PBL27 description:Serine/threonine-protein kinase PBL27 [Source:Q1PDV6]	REFNigelle_013044.p1	Aqcoe1G484000.1.p	2e-169	AT5G02800.1	Protein kinase superfamily protein
RN_013131	0.0460066546454536	0.561260721360326	-	#N/A	#N/A	#N/A	#N/A	#N/A	#N/A	#N/A	#N/A	#N/A
RN_013160	0.799392089987686	1.14678987419573		#N/A	#N/A	#N/A	#N/A	#N/A	#N/A	#N/A	#N/A	#N/A
RN_013231	0.79015795354066	1.77142100846621	-	#N/A	#N/A	#N/A	#N/A	#N/A	#N/A	#N/A	#N/A	#N/A
RN_013256	-0.172415527753594	1.32858884460133	-	REFNigelle_013256.p1	AT4G15630.1	5.77e-45	CASP-like protein 1E1 [Source:UniProtKB/Swiss-Prot;Acc:Q8L8Z1]	REFNigelle_013256.p1	Aqcoe5G072200.1.p	1e-68	AT4G15630.1	Uncharacterised protein family (UPF0497)
RN_013286	-0.170064124902793	0.236242904818491	-	REFNigelle_013286.p1	AT3G13470.1	0	CPN60B2 description:Chaperonin 60 subunit beta 2, chloroplastic [Source:Q9LJE4]	REFNigelle_013286.p1	Aqcoe7G412200.1.p	0	AT3G13470.1	TCP-1/cpn60 chaperonin family protein
RN_013291	-1.03528004455502	-1.31614457630823	-	REFNigelle_013291.p1	AT3G14850.2	1.12e-150	TBL41 description:Protein trichome birefringence-like 41 [Source:F4IWA8]	REFNigelle_013291.p1	Aqcoe1G214000.1.p	0	AT2G30900.1	TRICHOME BIREFRINGENCE-LIKE 43
RN_013392	2.23807820449287	2.1242789829022	-	#N/A	#N/A	#N/A	#N/A	#N/A	#N/A	#N/A	#N/A	#N/A
RN_013395	2.12564317172457	2.46576131657302	-	#N/A	#N/A	#N/A	#N/A	#N/A	#N/A	#N/A	#N/A	#N/A
RN_013397	1.26512380761662	1.22780641824176	-	#N/A	#N/A	#N/A	#N/A	#N/A	#N/A	#N/A	#N/A	#N/A
RN_013418	-1.23020652312545	-1.63498634216043	-	#N/A	#N/A	#N/A	#N/A	#N/A	#N/A	#N/A	#N/A	#N/A
RN_013431	0.0160847546692475	0.951662874501888	-	#N/A	#N/A	#N/A	#N/A	#N/A	#N/A	#N/A	#N/A	#N/A
RN_013476	-1.52743386447582	0.49054495915346	-	REFNigelle_013476.p1	AT3G57040.1	1.21e-45	ARR9 description:Two-component response regulator ARR9 [Source:O80366]	REFNigelle_013476.p1	Aqcoe2G039200.1.p	3e-46	AT3G57040.1	response regulator 9
RN_013477	-0.584709901278808	-0.00929171333967419	-	REFNigelle_013477.p1	AT3G57040.1	7.47e-86	ARR9 description:Two-component response regulator ARR9 [Source:O80366]	REFNigelle_013477.p1	Aqcoe2G039200.1.p	9e-83	AT3G57040.1	response regulator 9
RN_013651	-0.245545123570122	0.0576262961731236	-	REFNigelle_013651.p1	AT4G16720.1	8.09e-126	RPL15A description:Ribosomal protein L15 [Source:A0A178V5T1]	REFNigelle_013651.p1	Aqcoe5G410300.1.p	2e-124	AT4G16720.1	Ribosomal protein L23/L15e family protein
RN_013856	0.484558782369116	1.12236106871317	-	#N/A	#N/A	#N/A	#N/A	#N/A	#N/A	#N/A	#N/A	#N/A
RN_013909	-0.941883874902354	-1.08901048504632	-	#N/A	#N/A	#N/A	#N/A	#N/A	#N/A	#N/A	#N/A	#N/A
RN_013968	-0.0578921100791738	0.393051999873859	-	#N/A	#N/A	#N/A	#N/A	#N/A	#N/A	#N/A	#N/A	#N/A
RN_014268	-0.536157150694073	-1.52316062367242	-	#N/A	#N/A	#N/A	#N/A	#N/A	#N/A	#N/A	#N/A	#N/A
RN_014294	-0.0598027320788352	0.853372699755087	-	#N/A	#N/A	#N/A	#N/A	#N/A	#N/A	#N/A	#N/A	#N/A
RN_014446	-0.639625774808012	-0.258054079898277	-	#N/A	#N/A	#N/A	#N/A	#N/A	#N/A	#N/A	#N/A	#N/A
RN_014459	-0.343238423679498	-0.64533848501845	-	REFNigelle_014459.p1	AT4G23160.2	7.64e-111	CRK8 description:cysteine-rich RLK (RECEPTOR-like protein kinase) 8 [Source:AT4G23160]	#N/A	#N/A	#N/A	#N/A	#N/A
RN_014460	-0.540249789989287	-0.847112191660099	-	REFNigelle_014460.p1	AT3G21000.1	1.93e-11	Gag-Pol-related retrotransposon family protein [Source:UniProtKB/TrEMBL;Acc:Q1PEN6]	REFNigelle_014460.p1	Aqcoe3G118700.1.p	9e-06	AT1G70370.2	polygalacturonase 2
RN_014489	0.758006425234807	0.669266263008783	-	#N/A	#N/A	#N/A	#N/A	#N/A	#N/A	#N/A	#N/A	#N/A
RN_014516	-0.354863962417716	-0.336725016321281	-	REFNigelle_014516.p1	AT5G07010.1	3.04e-90	SOT15 description:Sulfotransferase [Source:A0A178UG65]	REFNigelle_014516.p1	Aqcoe3G376500.1.p	2e-107	AT3G45070.1	P-loop containing nucleoside triphosphate hydrolases superfamily protein
RN_014766	1.062142539884	0.780269704885852	-	#N/A	#N/A	#N/A	#N/A	#N/A	#N/A	#N/A	#N/A	#N/A
RN_015148	-0.496608738051935	-1.34705205018782	-	REFNigelle_015148.p1	AT4G39010.2	1.22e-76	AtGH9B18 description:Endoglucanase 24 [Source:Q93YQ7]	REFNigelle_015148.p1	Aqcoe7G076800.1.p	3e-74	AT1G70710.1	glycosyl hydrolase 9B1
RN_015187	0.636715887427772	1.44847354027409	-	#N/A	#N/A	#N/A	#N/A	#N/A	#N/A	#N/A	#N/A	#N/A
RN_015219	0.306400498468913	0.383501483455623	-	REFNigelle_015219.p1	AT1G66100.1	2.4e-07	Probable thionin-2.4 [Source:UniProtKB/Swiss-Prot;Acc:Q9C8D6]	REFNigelle_015219.p1	Aqcoe4G073300.1.p	2e-14	AT1G66100.1	Plant thionin
RN_015232	-0.74318831181889	-0.805055567064427	-	#N/A	#N/A	#N/A	#N/A	#N/A	#N/A	#N/A	#N/A	#N/A
RN_015286	-0.341903558213895	-0.362488631350611	-	REFNigelle_015286.p1	AT5G11320.1	0	YUC4 description:YUC4 [Source:A0A178UJ31]	REFNigelle_015286.p1	Aqcoe7G200400.1.p	0	AT5G11320.1	Flavin-binding monooxygenase family protein
RN_015291	0.697773433509779	2.01655401713445	-	#N/A	#N/A	#N/A	#N/A	#N/A	#N/A	#N/A	#N/A	#N/A
RN_015338	0.160622814185734	0.848521213288912	-	#N/A	#N/A	#N/A	#N/A	#N/A	#N/A	#N/A	#N/A	#N/A
RN_015687	-1.56741721099541	-1.38901431153003	-	REFNigelle_015687.p1	AT4G02550.1	9.54e-11	unknown protein; BEST Arabidopsis thaliana protein match is: unknown protein (TAIR:AT4G02550]	REFNigelle_015687.p1	Aqcoe1G051700.3.p	7e-18	AT2G24960.2	0
RN_015711	-4.8757773898347	-2.56727445554665	-	REFNigelle_015711.p1	AT5G18610.1	1.16e-46	PBL27 description:Serine/threonine-protein kinase PBL27 [Source:Q1PDV6]	REFNigelle_015711.p1	Aqcoe5G345500.1.p	3e-49	AT5G13160.1	Protein kinase superfamily protein
RN_015777	0.384457820553158	1.7217838600555	0.951553961492637	REFNigelle_015777.p1	AT1G75125.1	9.51e-40	Plastid transcriptionally active protein [Source:UniProtKB/TrEMBL;Acc:A0A1P8AUX1]	REFNigelle_015777.p1	Aqcoe7G392700.4.p	1e-63	AT4G13670.1	plastid transcriptionally active 5
RN_015778	-0.534256358590453	-1.01835229083277	-	REFNigelle_015778.p1	AT1G75125.1	9.51e-40	Plastid transcriptionally active protein [Source:UniProtKB/TrEMBL;Acc:A0A1P8AUX1]	REFNigelle_015778.p1	Aqcoe7G392700.4.p	1e-63	AT4G13670.1	plastid transcriptionally active 5
RN_015824	-0.153091418624724	-0.430590405602374	-	REFNigelle_015824.p1	AT3G25230.1	0	ROF1 description:Peptidylprolyl isomerase [Source:B3H746]	REFNigelle_015824.p1	Aqcoe7G405100.1.p	0	AT3G25230.2	rotamase FKBP 1
RN_015830	0.0934382162215727	-0.864801863395152	-	#N/A	#N/A	#N/A	#N/A	#N/A	#N/A	#N/A	#N/A	#N/A
RN_015968	-1.02038771084042	-0.884458004065231	-	#N/A	#N/A	#N/A	#N/A	#N/A	#N/A	#N/A	#N/A	#N/A
RN_015975	-0.657220893486101	-0.540282798111711	-	REFNigelle_015975.p1	AT2G36870.1	1.44e-170	XTH32 description:Probable xyloglucan endotransglucosylase/hydrolase protein 32 [Source:Q9SJL9]	REFNigelle_015975.p1	Aqcoe1G131200.1.p	1e-180	AT2G36870.1	xyloglucan endotransglucosylase/hydrolase 32
RN_016181	-0.476422185141486	-0.441263588432893	-	REFNigelle_016181.p1	AT3G62980.1	0	TIR1 description:TIR1 [Source:A0A178VA54]	REFNigelle_016181.p1	Aqcoe4G260000.1.p	0	AT3G62980.1	F-box/RNI-like superfamily protein
RN_016189	0.149654714455572	1.19725847851426	-	#N/A	#N/A	#N/A	#N/A	#N/A	#N/A	#N/A	#N/A	#N/A
RN_016244	0.0555808490318474	-0.835639351752465	-	#N/A	#N/A	#N/A	#N/A	#N/A	#N/A	#N/A	#N/A	#N/A
RN_016357	-0.444697632546866	1.15927307185214	-	#N/A	#N/A	#N/A	#N/A	#N/A	#N/A	#N/A	#N/A	#N/A
RN_016395	0.697084845552228	0.401970764416782	-	REFNigelle_016395.p1	AT1G73325.1	2.68e-08	Kunitz family trypsin and protease inhibitor protein [Source:UniProtKB/TrEMBL;Acc:Q9FX28]	REFNigelle_016395.p1	Aqcoe6G187100.1.p	5e-32	AT1G17860.1	Kunitz family trypsin and protease inhibitor protein
RN_016477	-1.46100789559584	-0.269854982786756	-	#N/A	#N/A	#N/A	#N/A	#N/A	#N/A	#N/A	#N/A	#N/A
RN_016478	-1.2101920422044	-0.976139704328825	0.802001715909226	#N/A	#N/A	#N/A	#N/A	#N/A	#N/A	#N/A	#N/A	#N/A
RN_016726	0.0572161824575612	-0.528081608790142	-	REFNigelle_016726.p1	AT1G31600.4	2.88e-148	::protein_coding	REFNigelle_016726.p1	Aqcoe3G410700.1.p	2e-158	AT1G31600.1	RNA-binding (RRM/RBD/RNP motifs) family protein
RN_017109	1.1260251034178	0.636099271681811	-	#N/A	#N/A	#N/A	#N/A	#N/A	#N/A	#N/A	#N/A	#N/A
RN_017182	-0.303052671147834	0.869420153656129	-	REFNigelle_017182.p1	AT1G18340.1	1.05e-77	TFB4 description:General transcription and DNA repair factor IIH subunit TFB4 [Source:Q8LF41]	REFNigelle_017182.p1	Aqcoe6G168700.6.p	8e-75	AT1G18340.1	basal transcription factor complex subunit-related
RN_017195	0.571036095980163	0.898595545725197	-	REFNigelle_017195.p1	AT5G56560.2	1.72e-07	FBD, F-box and Leucine Rich Repeat domains containing protein [Source:TAIR;Acc:AT5G56560]	REFNigelle_017195.p1	Aqcoe3G211900.2.p	2e-25	AT3G59240.1	RNI-like superfamily protein
RN_017263	0.784477351915103	0.700023180976434	-	#N/A	#N/A	#N/A	#N/A	#N/A	#N/A	#N/A	#N/A	#N/A
RN_017275	-0.898306500198261	-0.929035883577788	-	REFNigelle_017275.p1	AT4G03115.4	5.72e-88	Mitochondrial substrate carrier family protein [Source:TAIR;Acc:AT4G03115]	REFNigelle_017275.p1	Aqcoe5G075300.2.p	1e-103	AT4G03115.1	Mitochondrial substrate carrier family protein
RN_017281	0.077122960791689	1.40895271716943	-	#N/A	#N/A	#N/A	#N/A	#N/A	#N/A	#N/A	#N/A	#N/A
RN_017311	-2.64770628495593	-0.265937695255758	-	REFNigelle_017311.p1	AT1G75450.1	0	CKX5 description:Cytokinin dehydrogenase 5 [Source:Q67YU0]	REFNigelle_017311.p1	Aqcoe6G130600.1.p	0	AT1G75450.1	cytokinin oxidase 5
RN_017386	-0.753681382458056	-1.09566702197702	-	#N/A	#N/A	#N/A	#N/A	#N/A	#N/A	#N/A	#N/A	#N/A
RN_017435	-0.741013768889497	-0.703858534903239	-	REFNigelle_017435.p1	AT1G64530.1	5.04e-50	NLP6 description:Protein NLP6 [Source:Q8RWY4]	REFNigelle_017435.p1	Aqcoe6G066000.2.p	3e-73	AT1G64530.1	Plant regulator RWP-RK family protein
RN_017461	0.123505874258246	-0.292830597735691	-	REFNigelle_017461.p1	AT5G18670.1	0	BAM9 description:Inactive beta-amylase 9 [Source:Q8VYW2]	REFNigelle_017461.p1	Aqcoe2G310100.1.p	0	AT5G18670.1	beta-amylase 3
RN_017613	0.938409754198722	0.987474860292776	-	REFNigelle_017613.p1	AT1G48720.1	1.06e-29	At1g48720 [Source:UniProtKB/TrEMBL;Acc:Q682G3]	#N/A	#N/A	#N/A	#N/A	#N/A
RN_017649	1.64368793670864	1.00334702460359	-0.935800971873467	REFNigelle_017649.p1	AT1G70520.1	1.75e-78	CRK2 description:Cysteine-rich receptor-like protein kinase 2 [Source:Q9CAL3]	REFNigelle_017649.p1	Aqcoe3G149500.3.p	4e-91	AT1G70520.1	cysteine-rich RLK (RECEPTOR-like protein kinase) 2
RN_017688	0.764693838593856	0.39811453585849	-	REFNigelle_017688.p1	AT3G57610.1	0	PURA description:Adenylosuccinate synthetase, chloroplastic [Source:Q96529]	REFNigelle_017688.p1	Aqcoe1G295300.1.p	0	AT3G57610.1	adenylosuccinate synthase
RN_017736	0.404286747985835	0.32754149323593	-	#N/A	#N/A	#N/A	#N/A	#N/A	#N/A	#N/A	#N/A	#N/A
RN_017737	0.286978218730775	0.0384130515063195	-	REFNigelle_017737.p1	AT4G35060.1	6.26e-72	HIPP25 description:HIPP25 [Source:A0A178V323]	REFNigelle_017737.p1	Aqcoe6G218700.1.p	1e-99	AT4G38580.1	farnesylated protein 6
RN_017755	-0.897985765235965	-0.805017761050368	-	#N/A	#N/A	#N/A	#N/A	#N/A	#N/A	#N/A	#N/A	#N/A
RN_017962	-2.43597481597508	-1.72090778431695	-	#N/A	#N/A	#N/A	#N/A	#N/A	#N/A	#N/A	#N/A	#N/A
RN_018079	-1.22002925070196	-0.775768140674279	-	#N/A	#N/A	#N/A	#N/A	#N/A	#N/A	#N/A	#N/A	#N/A
RN_018108	0.0430858594093096	-0.28028861308502	-	#N/A	#N/A	#N/A	#N/A	#N/A	#N/A	#N/A	#N/A	#N/A
RN_018153	0.98318037074105	1.17359900463445	-	#N/A	#N/A	#N/A	#N/A	REFNigelle_018153.p1	Aqcoe4G193400.1.p	7e-06	0	0
RN_018244	-0.00913816876854359	-0.587561969233085	-	REFNigelle_018244.p1	AT4G37880.1	2.56e-151	RMD5 description:Protein RMD5 homolog [Source:Q9T075]	REFNigelle_018244.p1	Aqcoe1G432300.2.p	0	AT4G37880.1	LisH/CRA/RING-U-box domains-containing protein
RN_018340	0.494018679258519	-0.288078642386837	-	REFNigelle_018340.p1	AT3G05500.1	4.28e-80	REF/SRPP-like protein At3g05500 [Source:UniProtKB/Swiss-Prot;Acc:Q9MA63]	REFNigelle_018340.p1	Aqcoe5G085100.1.p	4e-92	AT3G05500.1	Rubber elongation factor protein (REF)
RN_018407	0.204779401730029	-0.531223953687462	-	REFNigelle_018407.p1	AT1G29930.1	1.32e-170	LHCB1.3 description:Chlorophyll a-b binding protein 1, chloroplastic [Source:P04778]	REFNigelle_018407.p1	Aqcoe1G200700.1.p	2e-175	AT1G29930.1	chlorophyll A/B binding protein 1
RN_018419	0.906513872365801	1.70730848707196	-	REFNigelle_018419.p1	AT2G29420.1	4.7e-60	GSTU7 description:Glutathione S-transferase U7 [Source:Q9ZW24]	REFNigelle_018419.p1	Aqcoe5G008500.1.p	3e-107	AT2G29420.1	glutathione S-transferase tau 7
RN_018446	-0.0286093579839173	-1.17159398803682	-	#N/A	#N/A	#N/A	#N/A	#N/A	#N/A	#N/A	#N/A	#N/A
RN_018457	-1.82730062392817	-2.4712123544658	-	#N/A	#N/A	#N/A	#N/A	REFNigelle_018457.p1	Aqcoe4G114900.1.p	5e-09	0	0
RN_018458	-2.34140894983606	-2.38405132988183	-	#N/A	#N/A	#N/A	#N/A	#N/A	#N/A	#N/A	#N/A	#N/A
RN_018548	-0.0782614465445634	0.855088233687664	-	REFNigelle_018548.p1	AT3G43810.3	1.73e-16	CAM7 description:Calmodulin 7 [Source:A0A1I9LPJ2]	REFNigelle_018548.p1	Aqcoe3G407000.1.p	3e-16	AT2G27030.3	calmodulin 5
RN_018758	1.59426958389622	1.6542048165689		REFNigelle_018758.p1	AT2G02950.1	2.82e-25	PKS1 description:Protein PHYTOCHROME KINASE SUBSTRATE 1 [Source:Q9SWI1]	REFNigelle_018758.p1	Aqcoe3G080100.1.p	7e-91	AT2G02950.1	phytochrome kinase substrate 1
RN_018774	0.40584746441086	0.42081287909301	-	#N/A	#N/A	#N/A	#N/A	#N/A	#N/A	#N/A	#N/A	#N/A
RN_018924	-1.2966288488616	-3.08475465996639	-	#N/A	#N/A	#N/A	#N/A	#N/A	#N/A	#N/A	#N/A	#N/A
RN_019037	-0.190685366332888	-0.298142335269085	-	#N/A	#N/A	#N/A	#N/A	#N/A	#N/A	#N/A	#N/A	#N/A
RN_019143	0.478133077694402	1.62794974928954	-	#N/A	#N/A	#N/A	#N/A	#N/A	#N/A	#N/A	#N/A	#N/A
RN_019206	-0.384912282938951	0.15963831329913	-	REFNigelle_019206.p1	AT2G10940.2	1.49e-43	At2g10940/F15K19.1 [Source:UniProtKB/TrEMBL;Acc:Q9SKI0]	REFNigelle_019206.p1	Aqcoe6G315100.1.p	1e-32	AT2G10940.1	Bifunctional inhibitor/lipid-transfer protein/seed storage 2S albumin superfamily protein
RN_019207	-0.486373895768032	-0.097870043821654	-	REFNigelle_019207.p1	AT2G10940.2	1.49e-43	At2g10940/F15K19.1 [Source:UniProtKB/TrEMBL;Acc:Q9SKI0]	REFNigelle_019207.p1	Aqcoe6G315100.1.p	1e-32	AT2G10940.1	Bifunctional inhibitor/lipid-transfer protein/seed storage 2S albumin superfamily protein
RN_019462	-1.05497733420437	-0.396662208268477	0.988806503891317	REFNigelle_019462.p1	AT3G29320.1	0	PHS1 description:Alpha-glucan phosphorylase 1 [Source:Q9LIB2]	REFNigelle_019462.p1	Aqcoe3G360000.1.p	0	AT3G29320.1	Glycosyl transferase, family 35
RN_019564	-0.683905895803984	-2.09377690041232	-	#N/A	#N/A	#N/A	#N/A	#N/A	#N/A	#N/A	#N/A	#N/A
RN_019565	-1.36950734712531	-1.82987127919977	-	#N/A	#N/A	#N/A	#N/A	#N/A	#N/A	#N/A	#N/A	#N/A
RN_019759	1.70433952588011	1.38086349071556	-	#N/A	#N/A	#N/A	#N/A	#N/A	#N/A	#N/A	#N/A	#N/A
RN_019766	0.980044181209188	1.47461349422493	-	#N/A	#N/A	#N/A	#N/A	#N/A	#N/A	#N/A	#N/A	#N/A
RN_019767	-1.76573182170478	-1.62090540545912	-	#N/A	#N/A	#N/A	#N/A	#N/A	#N/A	#N/A	#N/A	#N/A
RN_019809	0.893585886911931	0.658049746630069	-	REFNigelle_019809.p1	AT1G10120.1	4.1e-56	BHLH74 description:Transcription factor bHLH74 [Source:Q6NKN9]	REFNigelle_019809.p1	Aqcoe6G259000.2.p	2e-155	AT1G10120.1	basic helix-loop-helix (bHLH) DNA-binding superfamily protein
RN_019956	1.61747308368025	0.630330037968658	-	REFNigelle_019956.p1	AT5G19390.3	0	ROPGAP7 description:Rho GTPase-activating protein 7 [Source:Q8RWQ4]	REFNigelle_019956.p1	Aqcoe2G042200.1.p	0	AT5G19390.2	Rho GTPase activation protein (RhoGAP) with PH domain
RN_020041	0.416524216910566	1.31491436552849	0.87794985400045	#N/A	#N/A	#N/A	#N/A	#N/A	#N/A	#N/A	#N/A	#N/A
RN_020098	0.575409382214518	0.262703307336087	-	REFNigelle_020098.p1	AT5G47450.1	5.97e-145	TIP2-3 description:Aquaporin TIP2-3 [Source:Q9FGL2]	REFNigelle_020098.p1	Aqcoe7G088600.1.p	2e-148	AT5G47450.1	tonoplast intrinsic protein 2;3
RN_020418	1.02260862717306	0.955556372840941	-	#N/A	#N/A	#N/A	#N/A	#N/A	#N/A	#N/A	#N/A	#N/A
RN_020707	0.850575991706479	0.597184336062729	-	REFNigelle_020707.p1	AT1G12663.1	0.000203	Thionin-like protein 2 [Source:UniProtKB/Swiss-Prot;Acc:A8MRP4]	#N/A	#N/A	#N/A	#N/A	#N/A
RN_020759	-0.540911071602488	-0.836796543197815	-	#N/A	#N/A	#N/A	#N/A	#N/A	#N/A	#N/A	#N/A	#N/A
RN_020781	-0.0675246191172288	-1.58588164175928	-	#N/A	#N/A	#N/A	#N/A	#N/A	#N/A	#N/A	#N/A	#N/A
RN_020834	-1.81146934589372	0.147545225319117	-	#N/A	#N/A	#N/A	#N/A	#N/A	#N/A	#N/A	#N/A	#N/A
RN_020854	0.528247874558352	1.1253443016582	-	#N/A	#N/A	#N/A	#N/A	#N/A	#N/A	#N/A	#N/A	#N/A
RN_020927	-0.0485924263343977	-0.226691511415099	-	REFNigelle_020927.p1	AT1G30690.2	3.37e-178	PATL4 description:Patellin-4 [Source:Q94C59]	REFNigelle_020927.p1	Aqcoe1G171300.1.p	0	AT1G30690.1	Sec14p-like phosphatidylinositol transfer family protein
RN_021087	-0.0553558859041666	-0.208690949883246	-	REFNigelle_021087.p1	AT5G08680.1	0	ATP synthase subunit beta-3, mitochondrial [Source:UniProtKB/Swiss-Prot;Acc:Q9C5A9]	REFNigelle_021087.p1	Aqcoe3G404200.1.p	0	AT5G08680.1	ATP synthase alpha/beta family protein
RN_021088	-0.128471512501174	-0.158068230554305	-	REFNigelle_021088.p1	AT5G08680.1	0	ATP synthase subunit beta-3, mitochondrial [Source:UniProtKB/Swiss-Prot;Acc:Q9C5A9]	REFNigelle_021088.p1	Aqcoe3G404200.1.p	0	AT5G08680.1	ATP synthase alpha/beta family protein
RN_021161	0.132352454573516	-0.635520143664501	-	REFNigelle_021161.p1	AT3G54340.1	1.08e-61	AP3 description:Floral homeotic protein APETALA 3 [Source:P35632]	REFNigelle_021161.p1	Aqcoe6G257100.1.p	3e-86	AT3G54340.1	K-box region and MADS-box transcription factor family protein
RN_021196	0.412562837160328	0.149595504867134	-	REFNigelle_021196.p1	AT1G58440.1	0	SQE1 description:XF1 [Source:A0A178W2I2]	REFNigelle_021196.p1	Aqcoe6G318000.1.p	0	AT1G58440.1	FAD/NAD(P)-binding oxidoreductase family protein
RN_021197	0.512684394189959	0.174841328561915	-	REFNigelle_021197.p1	AT1G58440.1	0	SQE1 description:XF1 [Source:A0A178W2I2]	REFNigelle_021197.p1	Aqcoe6G318000.1.p	0	AT1G58440.1	FAD/NAD(P)-binding oxidoreductase family protein
RN_021207	-0.11797781600228	-0.410692840773951	-	REFNigelle_021207.p1	AT1G08570.1	7.95e-91	ACHT4 description:Thioredoxin-like 1-1, chloroplastic [Source:O64654]	REFNigelle_021207.p1	Aqcoe3G344900.1.p	2e-142	AT1G08570.1	atypical CYS HIS rich thioredoxin 4
RN_021415	-0.519237153111342	-1.39589251595854	-	#N/A	#N/A	#N/A	#N/A	REFNigelle_021415.p1	Aqcoe2G198500.1.p	2e-107	0	0
RN_021569	0.429221917974175	0.593759571468892	-	#N/A	#N/A	#N/A	#N/A	#N/A	#N/A	#N/A	#N/A	#N/A
RN_021699	-1.37621276916723	-0.684272915093963	-	REFNigelle_021699.p1	AT3G05850.1	8.89e-07	MUG7 [Source:UniProtKB/TrEMBL;Acc:A0A178VB69]	#N/A	#N/A	#N/A	#N/A	#N/A
RN_021789	0.275048899047285	-0.484273674969268	-	REFNigelle_021789.p1	AT1G72830.1	2.08e-46	HAP2C description:Nuclear factor Y, subunit A3 [Source:F4IEZ6]	REFNigelle_021789.p1	Aqcoe7G116700.2.p	4e-142	AT1G72830.1	nuclear factor Y, subunit A3
RN_022159	0.903619936598175	1.33581589158126	-	#N/A	#N/A	#N/A	#N/A	#N/A	#N/A	#N/A	#N/A	#N/A
RN_022216	-0.490447116030851	-0.419263099340615	-	#N/A	#N/A	#N/A	#N/A	#N/A	#N/A	#N/A	#N/A	#N/A
RN_022258	0.457927337973281	1.06375612388597	-	#N/A	#N/A	#N/A	#N/A	#N/A	#N/A	#N/A	#N/A	#N/A
RN_022259	1.98177820828136	1.07262552098047	-	#N/A	#N/A	#N/A	#N/A	#N/A	#N/A	#N/A	#N/A	#N/A
RN_022263	0.257792230751188	0.262483907979602	-	#N/A	#N/A	#N/A	#N/A	#N/A	#N/A	#N/A	#N/A	#N/A
RN_022297	0.156600471290816	-0.282599208544916	-	REFNigelle_022297.p1	AT5G13630.1	0	CHLH description:Magnesium-chelatase subunit ChlH, chloroplastic [Source:Q9FNB0]	REFNigelle_022297.p1	Aqcoe2G017000.1.p	0	AT5G13630.1	magnesium-chelatase subunit chlH, chloroplast, putative / Mg-protoporphyrin IX chelatase, putative (CHLH)
RN_022444	0.392238399204932	0.118666763413176	-	REFNigelle_022444.p1	AT2G32300.1	1.78e-21	UCC1 description:uclacyanin 1 [Source:AT2G32300]	REFNigelle_022444.p1	Aqcoe4G287900.1.p	3e-36	AT2G32300.1	uclacyanin 1
RN_022445	0.45163067837663	0.489125620638096	-	#N/A	#N/A	#N/A	#N/A	#N/A	#N/A	#N/A	#N/A	#N/A
RN_022556	0.663398127776915	0.97951424782971	-	REFNigelle_022556.p1	AT5G38020.1	7.67e-50	At5g38020 [Source:UniProtKB/TrEMBL;Acc:Q84MB1]	REFNigelle_022556.p1	Aqcoe6G125900.2.p	8e-60	AT5G38020.1	S-adenosyl-L-methionine-dependent methyltransferases superfamily protein
RN_022714	-0.348371854470023	-1.69194508072478	-	#N/A	#N/A	#N/A	#N/A	#N/A	#N/A	#N/A	#N/A	#N/A
RN_022719	1.99476649577484	2.25915119149499	-	#N/A	#N/A	#N/A	#N/A	#N/A	#N/A	#N/A	#N/A	#N/A
RN_022725	0.17644384914294	1.82194375898395	-	#N/A	#N/A	#N/A	#N/A	#N/A	#N/A	#N/A	#N/A	#N/A
RN_022792	0.650235097414958	0.227425837949647	-	REFNigelle_022792.p1	AT4G29210.1	0	GGT3 description:Glutathione hydrolase 3 [Source:Q9M0G0]	REFNigelle_022792.p1	Aqcoe7G418500.1.p	0	AT4G29210.1	gamma-glutamyl transpeptidase 4
RN_022802	-0.13182316004718	-0.297362493900643	-	REFNigelle_022802.p1	AT5G24318.1	3.79e-175	O-Glycosyl hydrolases family 17 protein [Source:UniProtKB/TrEMBL;Acc:F4KH28]	REFNigelle_022802.p1	Aqcoe1G460300.1.p	0	AT5G24318.1	O-Glycosyl hydrolases family 17 protein
RN_022860	-1.08067758271383	-1.15601948495317	0.852943708527621	#N/A	#N/A	#N/A	#N/A	REFNigelle_022860.p1	Aqcoe2G128200.1.p	3e-10	0	0
RN_022917	0.557104514707381	0.334576476389563	-	REFNigelle_022917.p1	AT1G60420.1	9.7e-107	Probable nucleoredoxin 1 [Source:UniProtKB/Swiss-Prot;Acc:O80763]	REFNigelle_022917.p1	Aqcoe5G130700.2.p	0	AT1G60420.1	DC1 domain-containing protein
RN_022919	1.48224383455562	0.872410451363306	-	#N/A	#N/A	#N/A	#N/A	#N/A	#N/A	#N/A	#N/A	#N/A
RN_022923	-0.0989765939252591	0.719515338078001	-	REFNigelle_022923.p1	AT2G42570.1	9.01e-167	TBL39 description:Protein trichome birefringence-like 39 [Source:Q9SIN2]	REFNigelle_022923.p1	Aqcoe1G284000.1.p	0	AT2G42570.1	TRICHOME BIREFRINGENCE-LIKE 39
RN_022950	-0.528684393526112	-1.02751195005163	-	#N/A	#N/A	#N/A	#N/A	#N/A	#N/A	#N/A	#N/A	#N/A
RN_023008	-0.200009818032381	0.671832062359451	-	#N/A	#N/A	#N/A	#N/A	#N/A	#N/A	#N/A	#N/A	#N/A
RN_023065	-3.40124066947955	-3.26398996607928	-	#N/A	#N/A	#N/A	#N/A	#N/A	#N/A	#N/A	#N/A	#N/A
RN_023104	0.524541899120417	0.394406900764624	-	REFNigelle_023104.p1	AT5G36110.1	0	CYP716A1 description:Cytochrome P450 716A1 [Source:Q9LVY7]	REFNigelle_023104.p1	Aqcoe5G409900.1.p	0	AT5G36110.1	cytochrome P450, family 716, subfamily A, polypeptide 1
RN_023141	0.944702382045266	0.566177620798212	-	REFNigelle_023141.p1	AT1G65910.1	2.06e-14	anac028 description:NAC028 [Source:A0A178W7T7]	REFNigelle_023141.p1	Aqcoe3G424500.2.p	8e-100	AT1G65910.1	NAC domain containing protein 28
RN_023276	0.61636168150461	0.0651758637193374	-	REFNigelle_023276.p1	AT3G56400.1	9.49e-37	WRKY70 description:Probable WRKY transcription factor 70 [Source:Q9LY00]	REFNigelle_023276.p1	Aqcoe1G503300.1.p	2e-99	AT3G56400.1	WRKY DNA-binding protein 70
RN_023378	-1.23209895734318	0.385220402538035	-	REFNigelle_023378.p1	AT1G48300.1	4.22e-29	unknown protein; FUNCTIONS IN: molecular_function unknown; INVOLVED IN:AT1G48300]	REFNigelle_023378.p1	Aqcoe2G247500.1.p	1e-45	AT1G48300.1	0
RN_023379	-0.984943549651988	0.259354773257006	-	REFNigelle_023379.p1	AT1G48300.1	7.57e-54	unknown protein; FUNCTIONS IN: molecular_function unknown; INVOLVED IN:AT1G48300]	REFNigelle_023379.p1	Aqcoe2G247500.1.p	1e-64	AT1G48300.1	0
RN_023511	1.54041387231687	0.141538491124771	-	#N/A	#N/A	#N/A	#N/A	#N/A	#N/A	#N/A	#N/A	#N/A
RN_023974	0.523034648947401	-1.01679031268523	0.904382667658909	REFNigelle_023974.p1	AT3G13310.1	5.62e-25	At3g13310 [Source:UniProtKB/TrEMBL;Acc:Q9LTT7]	REFNigelle_023974.p1	Aqcoe1G338500.1.p	1e-38	AT3G13310.1	Chaperone DnaJ-domain superfamily protein
RN_024234	0.0976044120978408	-0.278404039476336	-	REFNigelle_024234.p1	AT3G06130.2	7.04e-47	HIPP32 description:Heavy metal-associated isoprenylated plant protein 32 [Source:Q9M8K5]	REFNigelle_024234.p1	Aqcoe2G332700.1.p	3e-52	AT3G06130.1	Heavy metal transport/detoxification superfamily protein
RN_024239	0.655402625766481	0.29145269332314	-	REFNigelle_024239.p1	AT1G21240.1	1.12e-09	WAK3 description:Wall-associated receptor kinase 3 [Source:Q9LMN8]	REFNigelle_024239.p1	Aqcoe7G085900.1.p	4e-17	AT1G21240.1	wall associated kinase 3
RN_024255	2.20844558362569	1.66629352557314	-	#N/A	#N/A	#N/A	#N/A	#N/A	#N/A	#N/A	#N/A	#N/A
RN_024321	1.46565366732391	1.49413808335045	-	#N/A	#N/A	#N/A	#N/A	#N/A	#N/A	#N/A	#N/A	#N/A
RN_024359	-0.343761147050964	-0.65520905235656	-	REFNigelle_024359.p1	AT4G35160.1	3.36e-66	ASMT description:Acetylserotonin O-methyltransferase [Source:Q9T003]	REFNigelle_024359.p1	Aqcoe1G249300.1.p	5e-172	AT4G35160.1	O-methyltransferase family protein
RN_024391	-0.909358086006747	-1.45492415618349	0.809495601620784	#N/A	#N/A	#N/A	#N/A	#N/A	#N/A	#N/A	#N/A	#N/A
RN_024720	-0.238843749324698	-0.249404223380525	-	REFNigelle_024720.p1	AT2G39700.1	2.4e-159	EXPA4 description:Expansin-A4 [Source:O48818]	REFNigelle_024720.p1	Aqcoe2G220000.1.p	2e-168	AT2G39700.1	expansin A4
RN_024726	-0.759610434231133	-2.78494270199871	-	#N/A	#N/A	#N/A	#N/A	#N/A	#N/A	#N/A	#N/A	#N/A
RN_024728	-2.12121456656894	-1.61734250104323	-	REFNigelle_024728.p1	AT1G27870.1	1.18e-05	Polynucleotidyl transferase, ribonuclease H-like superfamily protein [Source:UniProtKB/TrEMBL;Acc:Q9C6N1]	REFNigelle_024728.p1	Aqcoe7G287700.1.p	3e-06	AT4G29090.1	Ribonuclease H-like superfamily protein
RN_024792	-0.54696919092125	-0.0870548618384896	-	REFNigelle_024792.p1	AT1G74110.1	0	CYP78A10 description:Cytochrome P450 family protein [Source:Q9C9D1]	REFNigelle_024792.p1	Aqcoe5G358100.1.p	0	AT1G74110.1	cytochrome P450, family 78, subfamily A, polypeptide 10
RN_024799	0.164338522739422	0.271112527475545	-	REFNigelle_024799.p1	AT5G17540.1	7.14e-126	At5g17540 [Source:UniProtKB/TrEMBL;Acc:Q9LF70]	REFNigelle_024799.p1	Aqcoe4G270100.1.p	3e-177	AT5G17540.1	HXXXD-type acyl-transferase family protein
RN_024844	0.292731819432203	-0.467000360620137	-	REFNigelle_024844.p1	AT1G80920.1	1.02e-29	ATJ8 description:Chaperone protein dnaJ 8, chloroplastic [Source:Q9SAG8]	REFNigelle_024844.p1	Aqcoe7G355300.1.p	3e-41	AT1G80920.1	Chaperone DnaJ-domain superfamily protein
RN_024909	-0.111021852652072	-0.372143181584686	-	REFNigelle_024909.p1	AT4G14500.1	0	AT4g14500/dl3290w [Source:UniProtKB/TrEMBL;Acc:Q944M2]	REFNigelle_024909.p1	Aqcoe5G037200.1.p	0	AT4G14500.1	Polyketide cyclase/dehydrase and lipid transport superfamily protein
RN_024992	0.91038318455781	0.777056278497764	-	#N/A	#N/A	#N/A	#N/A	#N/A	#N/A	#N/A	#N/A	#N/A
RN_025015	0.34806302087136	0.295430426375029	-	REFNigelle_025015.p1	AT1G01500.1	1.31e-26	Uncharacterized protein At1g01500 [Source:UniProtKB/Swiss-Prot;Acc:Q8GUH2]	REFNigelle_025015.p1	Aqcoe7G440900.1.p	9e-22	AT1G75180.1	Erythronate-4-phosphate dehydrogenase family protein
RN_025033	2.29121054238821	0.897463817422021	-	#N/A	#N/A	#N/A	#N/A	#N/A	#N/A	#N/A	#N/A	#N/A
RN_025163	1.50766095880256	0.264763745852937	-	#N/A	#N/A	#N/A	#N/A	#N/A	#N/A	#N/A	#N/A	#N/A
RN_025172	0.466211320286167	0.245297169125448	-	REFNigelle_025172.p1	AT5G54510.1	0	GH3.6 description:GH3.6 [Source:A0A178UBG0]	REFNigelle_025172.p1	Aqcoe4G269800.1.p	0	AT4G27260.1	Auxin-responsive GH3 family protein
RN_025299	0.502896472558315	1.11866289338302	-	#N/A	#N/A	#N/A	#N/A	#N/A	#N/A	#N/A	#N/A	#N/A
RN_025300	0.429897547748754	1.38396630064968	0.997606380845384	#N/A	#N/A	#N/A	#N/A	#N/A	#N/A	#N/A	#N/A	#N/A
RN_025302	1.4885487155978	2.14978261438563	-	#N/A	#N/A	#N/A	#N/A	#N/A	#N/A	#N/A	#N/A	#N/A
RN_025316	-1.33043828678114	-0.642429395335935	-	REFNigelle_025316.p1	AT5G64130.1	2.58e-48	AT5G64130 protein [Source:UniProtKB/TrEMBL;Acc:A8MS32]	REFNigelle_025316.p1	Aqcoe7G094100.2.p	5e-49	AT5G64130.1	cAMP-regulated phosphoprotein 19-related protein
RN_025317	0.488741425963931	0.14354373843529	-	REFNigelle_025317.p1	AT5G64130.1	7.3e-49	AT5G64130 protein [Source:UniProtKB/TrEMBL;Acc:A8MS32]	REFNigelle_025317.p1	Aqcoe7G094100.2.p	8e-49	AT5G64130.1	cAMP-regulated phosphoprotein 19-related protein
RN_025328	-0.523895344812699	-2.00800761926332	0.846292168417691	#N/A	#N/A	#N/A	#N/A	#N/A	#N/A	#N/A	#N/A	#N/A
RN_025330	-1.21451732228378	-1.71786956323087	-	#N/A	#N/A	#N/A	#N/A	#N/A	#N/A	#N/A	#N/A	#N/A
RN_025392	0.355324667616695	0.343256039505017	-	#N/A	#N/A	#N/A	#N/A	#N/A	#N/A	#N/A	#N/A	#N/A
RN_025445	0.104082511600472	-0.796056402613349	-	REFNigelle_025445.p1	AT5G02230.2	5.21e-138	Haloacid dehalogenase-like hydrolase (HAD) superfamily protein [Source:TAIR;Acc:AT5G02230]	REFNigelle_025445.p1	Aqcoe1G108100.2.p	1e-177	AT5G02230.2	Haloacid dehalogenase-like hydrolase (HAD) superfamily protein
RN_025490	1.14912224041305	0.454813690586781	-	#N/A	#N/A	#N/A	#N/A	#N/A	#N/A	#N/A	#N/A	#N/A
RN_025492	0.402594332560646	0.107543920468906	-	REFNigelle_025492.p1	AT3G27200.1	4.54e-22	At3g27200 [Source:UniProtKB/TrEMBL;Acc:Q8VY59]	REFNigelle_025492.p1	Aqcoe4G287900.1.p	3e-67	AT2G32300.1	uclacyanin 1
RN_025523	0.985969124239194	0.632473268394504	-	#N/A	#N/A	#N/A	#N/A	#N/A	#N/A	#N/A	#N/A	#N/A
RN_025559	-0.253396651712892	-0.27144060047797	-	#N/A	#N/A	#N/A	#N/A	#N/A	#N/A	#N/A	#N/A	#N/A
RN_025698	-0.0703889164808861	-0.276510464461969	-	REFNigelle_025698.p1	AT3G16240.1	2.3e-150	TIP2-1 description:Aquaporin TIP2-1 [Source:Q41951]	REFNigelle_025698.p1	Aqcoe7G162100.1.p	2e-142	AT3G16240.1	delta tonoplast integral protein
RN_025734	-0.21522657124828	-0.176456622551193	-	REFNigelle_025734.p1	AT3G48560.1	0	ALS description:Acetolactate synthase, chloroplastic [Source:P17597]	REFNigelle_025734.p1	Aqcoe5G065200.1.p	0	AT3G48560.1	chlorsulfuron/imidazolinone resistant 1
RN_025786	0.565900834375325	0.651401105149752	-	#N/A	#N/A	#N/A	#N/A	#N/A	#N/A	#N/A	#N/A	#N/A
RN_025842	0.256529698644159	-0.0262829171969333	-	REFNigelle_025842.p1	AT5G02880.1	0	UPL4 description:E3 ubiquitin-protein ligase UPL4 [Source:Q9LYZ7]	REFNigelle_025842.p1	Aqcoe1G489100.2.p	0	AT5G02880.1	ubiquitin-protein ligase 4
RN_025847	0.192211248752912	0.590391834834003	-	#N/A	#N/A	#N/A	#N/A	#N/A	#N/A	#N/A	#N/A	#N/A
RN_025955	3.39483146587189	2.5563319486103	-	#N/A	#N/A	#N/A	#N/A	#N/A	#N/A	#N/A	#N/A	#N/A
RN_025956	-1.47413737772491	-1.83517052510891	-	REFNigelle_025956.p1	AT1G56290.1	2.86e-148	CwfJ-like family protein [Source:UniProtKB/TrEMBL;Acc:Q93ZX4]	REFNigelle_025956.p1	Aqcoe2G365500.2.p	3e-159	AT1G56290.1	CwfJ-like family protein
RN_025994	-0.494205401239543	-0.620757900236555	-	REFNigelle_025994.p1	AT4G29090.1	7.82e-60	Putative reverse transcriptase/RNA-dependent DNA polymerase [Source:UniProtKB/TrEMBL;Acc:Q9SZD8]	REFNigelle_025994.p1	Aqcoe5G099300.1.p	9e-32	AT4G29090.1	Ribonuclease H-like superfamily protein
RN_025995	-0.735851254449968	-1.17039052740908	-	REFNigelle_025995.p2	AT2G41590.1	7.21e-06	Putative Ta11-like non-LTR retroelement protein [Source:UniProtKB/TrEMBL;Acc:O22221]	REFNigelle_025995.p3	Aqcoe4G169100.1.p	9e-16	AT1G43760.1	DNAse I-like superfamily protein
RN_026071	-0.801001408823306	-1.24385521820172	-	#N/A	#N/A	#N/A	#N/A	#N/A	#N/A	#N/A	#N/A	#N/A
RN_026106	0.538560102124351	0.596948120699073	-	#N/A	#N/A	#N/A	#N/A	#N/A	#N/A	#N/A	#N/A	#N/A
RN_026134	-1.46169297565207	-0.814627249261141	-	#N/A	#N/A	#N/A	#N/A	#N/A	#N/A	#N/A	#N/A	#N/A
RN_026387	-0.0730547415872747	-0.256891665789473	-	REFNigelle_026387.p1	AT5G37010.1	2.89e-61	At5g37010 [Source:UniProtKB/TrEMBL;Acc:Q9FGV2]	REFNigelle_026387.p1	Aqcoe3G443800.1.p	2e-149	AT1G65710.1	0
RN_026391	-0.00279680374252807	1.13165441920243	-	#N/A	#N/A	#N/A	#N/A	#N/A	#N/A	#N/A	#N/A	#N/A
RN_026427	0.338611166463772	0.0458320151668304	-	REFNigelle_026427.p1	AT5G60600.1	0	ISPG description:4-hydroxy-3-methylbut-2-en-1-yl diphosphate synthase (ferredoxin), chloroplastic [Source:F4K0E8]	REFNigelle_026427.p1	Aqcoe1G145000.1.p	0	AT5G60600.1	4-hydroxy-3-methylbut-2-enyl diphosphate synthase
RN_026589	-2.17982965451111	-2.3102655232702	-0.867946730372706	REFNigelle_026589.p1	AT5G23200.1	4.1e-61	C5orf35 [Source:UniProtKB/TrEMBL;Acc:Q8RUI8]	REFNigelle_026589.p1	Aqcoe5G031300.1.p	4e-84	AT5G23200.1	0
RN_026594	0.353814563252399	1.22291282946772	-	#N/A	#N/A	#N/A	#N/A	#N/A	#N/A	#N/A	#N/A	#N/A
RN_026600	0.608022068720882	0.528521031989064	-	REFNigelle_026600.p1	AT4G25000.1	0	AMY1 description:Alpha-amylase 1 [Source:Q8VZ56]	REFNigelle_026600.p1	Aqcoe6G141400.2.p	0	AT4G25000.1	alpha-amylase-like
RN_026614	-0.539609341934183	-0.508010108958772	-	#N/A	#N/A	#N/A	#N/A	#N/A	#N/A	#N/A	#N/A	#N/A
RN_026668	-0.899049620296378	0.174661437533987	-	#N/A	#N/A	#N/A	#N/A	#N/A	#N/A	#N/A	#N/A	#N/A
RN_026686	-0.435591515286557	-0.28461314510247	-	REFNigelle_026686.p1	AT2G15010.1	0.000245	Probable thionin-2.3 [Source:UniProtKB/Swiss-Prot;Acc:Q8VZK8]	#N/A	#N/A	#N/A	#N/A	#N/A
RN_026687	-0.278176511615677	-0.120215420001685	-	#N/A	#N/A	#N/A	#N/A	#N/A	#N/A	#N/A	#N/A	#N/A
RN_026722	-1.15787436440616	-1.43345791809752	0.908330565543711	#N/A	#N/A	#N/A	#N/A	#N/A	#N/A	#N/A	#N/A	#N/A
RN_026723	0.679105262174394	1.63173123399085	-	#N/A	#N/A	#N/A	#N/A	#N/A	#N/A	#N/A	#N/A	#N/A
RN_026760	0.47417026281774	0.94230717414824	-	REFNigelle_026760.p1	AT5G55100.1	3.14e-148	SWAP (Suppressor-of-White-APricot)/surp domain-containing protein [Source:UniProtKB/TrEMBL;Acc:Q94BN8]	REFNigelle_026760.p1	Aqcoe4G210700.1.p	0	AT5G55100.2	SWAP (Suppressor-of-White-APricot)/surp domain-containing protein
RN_026884	-1.04512825948082	-0.279572073722193	-	#N/A	#N/A	#N/A	#N/A	#N/A	#N/A	#N/A	#N/A	#N/A
RN_026891	0.79253338093269	0.687879969166862	-	REFNigelle_026891.p1	AT2G26490.1	0	JGB description:Protein JINGUBANG [Source:O48716]	REFNigelle_026891.p1	Aqcoe6G103100.1.p	0	AT2G26490.1	Transducin/WD40 repeat-like superfamily protein
RN_026921	1.39999774953452	1.85944019870179	-	#N/A	#N/A	#N/A	#N/A	#N/A	#N/A	#N/A	#N/A	#N/A
RN_026923	-0.157996062883645	0.683750664097176	-	#N/A	#N/A	#N/A	#N/A	#N/A	#N/A	#N/A	#N/A	#N/A
RN_026940	0.630070327407536	0.40638023052665	-	#N/A	#N/A	#N/A	#N/A	#N/A	#N/A	#N/A	#N/A	#N/A
RN_026942	-0.186212703929823	-0.363891608456854	-	REFNigelle_026942.p1	AT1G13710.1	0	CYP78A5 description:Cytochrome P450 78A5 [Source:Q9LMX7]	REFNigelle_026942.p1	Aqcoe3G367800.1.p	0	AT1G74110.1	cytochrome P450, family 78, subfamily A, polypeptide 10
RN_027048	2.09672634782116	1.7236734330193	-	#N/A	#N/A	#N/A	#N/A	#N/A	#N/A	#N/A	#N/A	#N/A
RN_027049	1.44808439796076	1.85238166291206	-	#N/A	#N/A	#N/A	#N/A	#N/A	#N/A	#N/A	#N/A	#N/A
RN_027050	1.88984784626818	3.12521840969956	-	#N/A	#N/A	#N/A	#N/A	#N/A	#N/A	#N/A	#N/A	#N/A
RN_027122	-0.0930355700690211	1.43240621190191	0.956185555322823	#N/A	#N/A	#N/A	#N/A	#N/A	#N/A	#N/A	#N/A	#N/A
RN_027272	-0.183685520501724	-0.134532997323226	-	REFNigelle_027272.p1	AT4G12110.1	1.62e-166	SMO1-1 description:SMO1-1 [Source:A0A178UWJ7]	REFNigelle_027272.p1	Aqcoe7G069000.1.p	0	AT4G12110.1	sterol-4alpha-methyl oxidase 1-1
RN_027362	0.0529164626291071	-0.227161222346976	-	REFNigelle_027362.p1	AT1G15910.1	0	FDM1 description:IDP1 [Source:A0A178W3T4]	REFNigelle_027362.p1	Aqcoe7G360600.1.p	0	AT1G15910.1	XH/XS domain-containing protein
RN_027530	-0.742948372005503	1.43796510429006	-	#N/A	#N/A	#N/A	#N/A	#N/A	#N/A	#N/A	#N/A	#N/A
RN_027549	0.932080501997986	0.947683059008101	-	#N/A	#N/A	#N/A	#N/A	#N/A	#N/A	#N/A	#N/A	#N/A
RN_027550	0.646475102978665	0.33570150949485	-	REFNigelle_027550.p1	AT2G17570.1	4.3e-110	Dehydrodolichyl diphosphate synthase 6 [Source:UniProtKB/Swiss-Prot;Acc:Q8S2T1]	REFNigelle_027550.p1	Aqcoe6G175700.3.p	4e-131	AT2G17570.1	Undecaprenyl pyrophosphate synthetase family protein
RN_027636	1.34386007023301	2.06354271821092	-	#N/A	#N/A	#N/A	#N/A	#N/A	#N/A	#N/A	#N/A	#N/A
RN_027678	0.653914807322935	0.659765872341525	-	REFNigelle_027678.p1	AT3G62830.1	0	UXS2 description:UDP-glucuronic acid decarboxylase 2 [Source:Q9LZI2]	REFNigelle_027678.p1	Aqcoe2G292600.1.p	0	AT3G62830.2	NAD(P)-binding Rossmann-fold superfamily protein
RN_027695	0.940849870701628	1.31874978590119	-	#N/A	#N/A	#N/A	#N/A	#N/A	#N/A	#N/A	#N/A	#N/A
RN_027696	-0.809919906693328	-1.13647338642112	-	#N/A	#N/A	#N/A	#N/A	#N/A	#N/A	#N/A	#N/A	#N/A
RN_027723	1.55264596614298	2.34602575364715	-	#N/A	#N/A	#N/A	#N/A	#N/A	#N/A	#N/A	#N/A	#N/A
RN_027739	-0.444910384229065	-0.569716517961854	-	#N/A	#N/A	#N/A	#N/A	#N/A	#N/A	#N/A	#N/A	#N/A
RN_027851	0.27047829566624	0.232660337133172	-	REFNigelle_027851.p1	AT1G05170.2	0	B3GALT2 description:Hexosyltransferase (Fragment) [Source:W8Q3U9]	REFNigelle_027851.p1	Aqcoe1G232100.2.p	0	AT1G05170.1	Galactosyltransferase family protein
RN_027971	0.83142774051709	0.593240946233609	-	#N/A	#N/A	#N/A	#N/A	#N/A	#N/A	#N/A	#N/A	#N/A
RN_027988	0.501306964104926	0.341613858791659	-	REFNigelle_027988.p1	AT2G22420.1	3.34e-180	PER17 description:Peroxidase 17 [Source:Q9SJZ2]	REFNigelle_027988.p1	Aqcoe6G078600.1.p	0	AT2G22420.1	Peroxidase superfamily protein
RN_028052	1.2233693873194	1.0885880565281	-	#N/A	#N/A	#N/A	#N/A	#N/A	#N/A	#N/A	#N/A	#N/A
RN_028075	-1.1452146314456	-0.802442577928346	0.876355599973235	REFNigelle_028075.p1	AT5G48500.1	1.29e-20	Pathogenic type III effector avirulence factor Avr AvrRpt-cleavage: cleavage site protein [Source:Q8LEL0]	REFNigelle_028075.p1	Aqcoe5G011600.2.p	5e-67	AT5G48500.1	0
RN_028077	-0.657659718490704	-0.408556663690626	-	REFNigelle_028077.p1	AT5G48500.1	5.22e-21	Pathogenic type III effector avirulence factor Avr AvrRpt-cleavage: cleavage site protein [Source:Q8LEL0]	REFNigelle_028077.p1	Aqcoe5G011600.2.p	9e-69	AT5G48500.1	0
RN_028118	0.708885042059294	0.404385790240313	-	#N/A	#N/A	#N/A	#N/A	REFNigelle_028118.p1	Aqcoe2G380800.1.p	0.0004	AT1G04020.1	breast cancer associated RING 1
RN_028146	-1.58480063210584	-0.373350562448025	0.806883773390563	REFNigelle_028146.p1	AT5G51600.1	3.17e-33	MAP65-3 description:65-kDa microtubule-associated protein 3 [Source:Q9FHM4]	REFNigelle_028146.p1	Aqcoe7G066300.1.p	2e-48	AT5G51600.1	Microtubule associated protein (MAP65/ASE1) family protein
RN_028186	0.345415418605767	0.391142007594384	-	REFNigelle_028186.p1	AT5G62790.1	0	DXR description:1-deoxy-D-xylulose 5-phosphate reductoisomerase [Source:F4K7T6]	REFNigelle_028186.p1	Aqcoe3G290500.1.p	0	AT5G62790.1	1-deoxy-D-xylulose 5-phosphate reductoisomerase
RN_028187	0.843821827085083	0.239155423878038	-	REFNigelle_028187.p1	AT5G62790.1	0	DXR description:1-deoxy-D-xylulose 5-phosphate reductoisomerase [Source:F4K7T6]	REFNigelle_028187.p1	Aqcoe3G290500.1.p	0	AT5G62790.1	1-deoxy-D-xylulose 5-phosphate reductoisomerase
RN_028198	-0.284612506650016	-0.242764232370485	-	REFNigelle_028198.p1	AT4G13690.1	9.16e-28	RNA-binding protein [Source:UniProtKB/TrEMBL;Acc:Q1PE84]	REFNigelle_028198.p1	Aqcoe5G006500.1.p	4e-81	AT4G13690.1	0
RN_028241	0.983827380647618	-0.210611987467812	-	#N/A	#N/A	#N/A	#N/A	#N/A	#N/A	#N/A	#N/A	#N/A
RN_028338	-0.19657964260898	-0.278679536907506	-	REFNigelle_028338.p1	AT2G42490.1	0	Amine oxidase [Source:UniProtKB/TrEMBL;Acc:Q8L866]	REFNigelle_028338.p1	Aqcoe3G145400.1.p	0	AT2G42490.1	Copper amine oxidase family protein
RN_028434	-0.234724381003038	-0.214380625184272	-	REFNigelle_028434.p1	AT5G02970.1	0	AT5g02970/F9G14_280 [Source:UniProtKB/TrEMBL;Acc:Q9LYY8]	REFNigelle_028434.p1	Aqcoe2G211800.1.p	0	AT5G02970.1	alpha/beta-Hydrolases superfamily protein
RN_028508	0.497618143179936	0.80779207086684	-	#N/A	#N/A	#N/A	#N/A	#N/A	#N/A	#N/A	#N/A	#N/A
RN_028517	-0.558597746094412	-0.714471897672812	-	#N/A	#N/A	#N/A	#N/A	#N/A	#N/A	#N/A	#N/A	#N/A
RN_028600	1.9130152624304	1.88525180535318	-0.858265081772545	#N/A	#N/A	#N/A	#N/A	#N/A	#N/A	#N/A	#N/A	#N/A
RN_028601	-1.00732462006714	-2.77280318357781	-	#N/A	#N/A	#N/A	#N/A	#N/A	#N/A	#N/A	#N/A	#N/A
RN_028641	0.179863473234337	1.33046969506518	0.927006949688546	#N/A	#N/A	#N/A	#N/A	REFNigelle_028641.p1	Aqcoe2G157500.1.p	3e-09	AT2G02520.1	RNA-directed DNA polymerase (reverse transcriptase)-related family protein
RN_028716	0.443893207249518	1.74540479722151	-	#N/A	#N/A	#N/A	#N/A	#N/A	#N/A	#N/A	#N/A	#N/A
RN_028719	0.533215823089919	0.35836640300473	-	REFNigelle_028719.p1	AT3G14570.1	0	CALS8 description:Putative callose synthase 8 [Source:Q9LUD7]	REFNigelle_028719.p1	Aqcoe4G035800.1.p	0	AT3G14570.1	glucan synthase-like 4
RN_028764	-0.219599430024373	-0.143766767817826	-	REFNigelle_028764.p1	AT5G13490.1	0	AAC2 description:AAC2 [Source:A0A178UF67]	REFNigelle_028764.p1	Aqcoe2G014000.2.p	0	AT5G13490.1	ADP/ATP carrier 2
RN_028781	-1.61531564341895	-2.26685056020954	-	#N/A	#N/A	#N/A	#N/A	#N/A	#N/A	#N/A	#N/A	#N/A
RN_028784	-1.52931560013738	-1.96118483865315	-	#N/A	#N/A	#N/A	#N/A	#N/A	#N/A	#N/A	#N/A	#N/A
RN_028813	-1.04034319781387	-1.3496772036242	-	REFNigelle_028813.p1	AT5G66330.1	2.78e-122	Leucine-rich repeat (LRR) family protein [Source:UniProtKB/TrEMBL;Acc:Q9FH56]	REFNigelle_028813.p1	Aqcoe6G256800.1.p	5e-164	AT5G66330.1	Leucine-rich repeat (LRR) family protein
RN_028816	1.13798908525073	0.122081235949248	-	REFNigelle_028816.p1	AT5G66330.1	1.1e-169	Leucine-rich repeat (LRR) family protein [Source:UniProtKB/TrEMBL;Acc:Q9FH56]	REFNigelle_028816.p1	Aqcoe6G256800.1.p	0	AT5G66330.1	Leucine-rich repeat (LRR) family protein
RN_028834	0.284234023248538	1.01192786140739	-	#N/A	#N/A	#N/A	#N/A	#N/A	#N/A	#N/A	#N/A	#N/A
RN_028853	-3.7473423363901	5.13197760151145	-	#N/A	#N/A	#N/A	#N/A	#N/A	#N/A	#N/A	#N/A	#N/A
RN_028855	-2.03497365700198	-2.17240724989677	-	REFNigelle_028855.p1	AT3G04500.1	9.13e-112	Putative RRM-containing protein [Source:UniProtKB/TrEMBL;Acc:Q9M837]	REFNigelle_028855.p1	Aqcoe5G024100.2.p	2e-122	AT3G04500.1	RNA-binding (RRM/RBD/RNP motifs) family protein
RN_028856	2.11139989380666	1.99063833554411	-	REFNigelle_028856.p1	AT3G04500.1	9.13e-112	Putative RRM-containing protein [Source:UniProtKB/TrEMBL;Acc:Q9M837]	REFNigelle_028856.p1	Aqcoe5G024100.2.p	2e-122	AT3G04500.1	RNA-binding (RRM/RBD/RNP motifs) family protein
RN_028947	0.668091615095516	0.230156276818488	-	REFNigelle_028947.p1	AT4G16740.1	2.34e-162	TPS03 description:Tricyclene synthase, chloroplastic [Source:A4FVP2]	REFNigelle_028947.p1	Aqcoe4G253500.1.p	0	AT3G25830.1	terpene synthase-like sequence-1,8-cineole
RN_028965	-0.0977690054835367	0.421509199245087	-	REFNigelle_028965.p1	AT2G30350.2	4.97e-80	Structure-specific endonuclease subunit SLX1 homolog [Source:UniProtKB/TrEMBL;Acc:A0A178VUD7]	REFNigelle_028965.p1	Aqcoe2G078200.1.p	8e-139	AT2G30350.2	Excinuclease ABC, C subunit, N-terminal
RN_029021	-0.0325186762688782	-0.26192510074448	-	REFNigelle_029021.p1	AT2G38740.1	7.8e-108	SGPP description:Haloacid dehalogenase-like hydrolase domain-containing protein Sgpp [Source:Q9ZVJ5]	REFNigelle_029021.p1	Aqcoe3G253600.1.p	1e-143	AT2G38740.1	Haloacid dehalogenase-like hydrolase (HAD) superfamily protein
RN_029145	0.211252352223848	0.416641407524407	-	#N/A	#N/A	#N/A	#N/A	#N/A	#N/A	#N/A	#N/A	#N/A
RN_029442	-0.15714126814473	-0.185594828447856	-	REFNigelle_029442.p1	AT5G62710.1	0	Leucine-rich repeat protein kinase family protein [Source:UniProtKB/TrEMBL;Acc:Q8GX94]	REFNigelle_029442.p1	Aqcoe3G324100.1.p	0	AT5G62710.1	Leucine-rich repeat protein kinase family protein
RN_029462	0.231054261574144	0.435169175656112	-	REFNigelle_029462.p1	AT4G33790.1	0	FAR3 description:Fatty acyl-CoA reductase 3 [Source:Q93ZB9]	REFNigelle_029462.p1	Aqcoe2G136000.1.p	0	AT3G44540.1	fatty acid reductase 4
RN_029530	-1.3200804453685	0.17268938671204	-	REFNigelle_029530.p1	AT3G45140.1	0	LOX2 description:Lipoxygenase 2, chloroplastic [Source:P38418]	REFNigelle_029530.p1	Aqcoe1G020300.1.p	0	AT3G45140.1	lipoxygenase 2
RN_029573	-2.03277185691057	0.253259733700269	0.814905856859085	#N/A	#N/A	#N/A	#N/A	#N/A	#N/A	#N/A	#N/A	#N/A
RN_029880	0.172177232347157	0.610450600183963	-	REFNigelle_029880.p1	AT1G67360.1	7.72e-09	REF/SRPP-like protein At1g67360 [Source:UniProtKB/Swiss-Prot;Acc:Q9FYF7]	REFNigelle_029880.p1	Aqcoe5G085100.1.p	5e-06	AT3G05500.1	Rubber elongation factor protein (REF)
RN_029881	0.34523113602771	1.56439854952459	-	#N/A	#N/A	#N/A	#N/A	REFNigelle_029881.p1	Aqcoe2G063900.1.p	1e-23	AT1G26820.1	ribonuclease 3
RN_029960	0.372720417138157	0.0289524057193958	-	REFNigelle_029960.p1	AT1G26640.1	1.35e-163	IPK description:Isopentenyl phosphate kinase [Source:Q8H1F7]	REFNigelle_029960.p1	Aqcoe3G353500.1.p	0	AT1G26640.1	Amino acid kinase family protein
RN_029961	0.303132539596635	0.261906666115146	-	#N/A	#N/A	#N/A	#N/A	#N/A	#N/A	#N/A	#N/A	#N/A
RN_030000	-1.2492928511431	-0.729708657678844	-	#N/A	#N/A	#N/A	#N/A	#N/A	#N/A	#N/A	#N/A	#N/A
RN_030096	0.66991674471302	1.32854058768761	-	REFNigelle_030096.p1	AT1G03940.1	5.63e-73	3AT1 description:Coumaroyl-CoA:Q9ZWB4]	REFNigelle_030096.p1	Aqcoe1G305200.1.p	2e-120	AT1G03495.1	HXXXD-type acyl-transferase family protein
RN_030103	0.4006289183639	1.94576810586157	-	#N/A	#N/A	#N/A	#N/A	#N/A	#N/A	#N/A	#N/A	#N/A
RN_030123	1.62744769348617	1.29981277181395	-	#N/A	#N/A	#N/A	#N/A	#N/A	#N/A	#N/A	#N/A	#N/A
RN_030245	-0.600986772402868	-0.480934514033034	-	REFNigelle_030245.p1	AT4G37180.1	1.53e-58	HHO5 description:Transcription factor HHO5 [Source:F4JRB0]	REFNigelle_030245.p1	Aqcoe6G095900.1.p	5e-145	AT1G25550.1	myb-like transcription factor family protein
RN_030279	-0.0509744214635647	-1.15059543071631		REFNigelle_030279.p1	AT5G25900.1	0	KO description:Ent-kaurene oxidase, chloroplastic [Source:Q93ZB2]	REFNigelle_030279.p1	Aqcoe6G099400.1.p	0	AT5G25900.1	GA requiring 3
RN_030289	-1.04316169839666	-1.70858239809533	-	#N/A	#N/A	#N/A	#N/A	#N/A	#N/A	#N/A	#N/A	#N/A
RN_030452	-1.15918906663101	-0.861027063452411	-	#N/A	#N/A	#N/A	#N/A	#N/A	#N/A	#N/A	#N/A	#N/A
RN_030520	0.314527773065918	0.784462785742731	-	REFNigelle_030520.p1	AT1G21310.1	9.12e-17	EXT3 description:Extensin-3 [Source:Q9FS16]	#N/A	#N/A	#N/A	#N/A	#N/A
RN_030608	-0.325519694530929	-0.237090824122027	-	REFNigelle_030608.p1	AT5G14800.1	2.05e-147	PROC1 description:Pyrroline-5-carboxylate reductase [Source:P54904]	REFNigelle_030608.p1	Aqcoe2G035000.1.p	1e-157	AT5G14800.1	pyrroline-5- carboxylate (P5C) reductase
RN_030630	2.1633277875159	1.90906196998352	-0.861709781682818	REFNigelle_030630.p1	AT3G22990.1	4.98e-174	LFR description:Armadillo repeat-containing protein LFR [Source:Q9LS90]	REFNigelle_030630.p1	Aqcoe5G044800.1.p	0	AT3G22990.1	ARM repeat superfamily protein
RN_030631	-1.43507979355542	-1.02994093277907	-	REFNigelle_030631.p1	AT3G22990.1	2.33e-79	LFR description:Armadillo repeat-containing protein LFR [Source:Q9LS90]	REFNigelle_030631.p1	Aqcoe5G044800.2.p	2e-128	AT3G22990.1	ARM repeat superfamily protein
RN_030796	-0.068222762001457	0.72243108117067	-	#N/A	#N/A	#N/A	#N/A	REFNigelle_030796.p1	Aqcoe3G341100.1.p	1e-22	0	0
RN_030805	0.42265615110706	0.268177198579162	-	REFNigelle_030805.p1	AT1G20510.1	0	4CLL5 description:4-coumarate--CoA ligase-like 5 [Source:Q84P21]	REFNigelle_030805.p1	Aqcoe5G124700.1.p	0	AT1G20510.1	OPC-8:0 CoA ligase1
RN_030862	2.86021452838726	2.1441675828064	-	#N/A	#N/A	#N/A	#N/A	#N/A	#N/A	#N/A	#N/A	#N/A
RN_030865	2.29912613697859	3.66517957697528	-	#N/A	#N/A	#N/A	#N/A	#N/A	#N/A	#N/A	#N/A	#N/A
RN_030953	-1.17870823637309	-0.614798864225394	-	REFNigelle_030953.p1	AT3G07350.1	9.81e-40	F21O3.6 protein [Source:UniProtKB/TrEMBL;Acc:Q9SRT1]	REFNigelle_030953.p1	Aqcoe5G022800.1.p	1e-55	AT3G07350.1	Protein of unknown function (DUF506)
RN_030965	-0.133331784800965	0.868624716004414	-	REFNigelle_030965.p1	AT4G23160.2	5.83e-143	CRK8 description:cysteine-rich RLK (RECEPTOR-like protein kinase) 8 [Source:AT4G23160]	REFNigelle_030965.p2	Aqcoe1G134000.1.p	5e-05	0	0
RN_031072	0.135964058467961	0.50076351170798	-	#N/A	#N/A	#N/A	#N/A	#N/A	#N/A	#N/A	#N/A	#N/A
RN_031133	0.540726621125248	0.168510373130374	-	REFNigelle_031133.p1	AT4G15560.1	0	DXS description:DXS1 [Source:A0A178V5I0]	REFNigelle_031133.p1	Aqcoe6G089700.1.p	0	AT4G15560.1	Deoxyxylulose-5-phosphate synthase
RN_031148	-0.17494236211542	-0.129933737623959	-	REFNigelle_031148.p1	AT4G16720.1	1.6e-124	RPL15A description:Ribosomal protein L15 [Source:A0A178V5T1]	REFNigelle_031148.p1	Aqcoe5G410300.1.p	1e-125	AT4G16720.1	Ribosomal protein L23/L15e family protein
RN_031387	0.478607795076373	-0.177580744138015	-	#N/A	#N/A	#N/A	#N/A	REFNigelle_031387.p3	Aqcoe2G128200.1.p	1e-23	0	0
RN_031395	0.608102665409983	0.621957204525927	-	REFNigelle_031395.p1	AT2G21790.1	0	RNR1 description:Ribonucleoside-diphosphate reductase large subunit [Source:Q9SJ20]	REFNigelle_031395.p1	Aqcoe6G043100.1.p	0	AT2G21790.1	ribonucleotide reductase 1
RN_031403	-0.327052838045088	-0.0735512716616099	-	REFNigelle_031403.p1	AT2G03770.1	1.15e-83	SOT13 description:Cytosolic sulfotransferase 13 [Source:Q9ZPQ5]	REFNigelle_031403.p1	Aqcoe4G219100.1.p	1e-122	AT3G45080.1	P-loop containing nucleoside triphosphate hydrolases superfamily protein
RN_031438	0.415964146072369	-0.0190299285723729	-	REFNigelle_031438.p1	AT1G05010.1	1.24e-167	ACO4 description:1-aminocyclopropane-1-carboxylate oxidase 4 [Source:Q06588]	REFNigelle_031438.p1	Aqcoe1G337900.1.p	3e-170	AT1G05010.1	ethylene-forming enzyme
RN_031443	-0.141003405818962	0.569969624051984	-	#N/A	#N/A	#N/A	#N/A	#N/A	#N/A	#N/A	#N/A	#N/A
RN_031492	-1.03706706805341	-3.43541465317586	0.929405404402439	REFNigelle_031492.p1	AT5G43750.1	1.71e-79	PNSB5 description:PnsB5 [Source:A0A178UJI2]	REFNigelle_031492.p1	Aqcoe5G042700.1.p	1e-110	AT5G43750.1	NAD(P)H dehydrogenase 18
RN_031494	2.12242684451767	2.70763730434649	-	REFNigelle_031494.p1	AT5G43750.1	1.23e-79	PNSB5 description:PnsB5 [Source:A0A178UJI2]	REFNigelle_031494.p1	Aqcoe5G042700.1.p	8e-115	AT5G43750.1	NAD(P)H dehydrogenase 18
RN_031637	1.6271874703789	0.691755612056735	-	#N/A	#N/A	#N/A	#N/A	#N/A	#N/A	#N/A	#N/A	#N/A
RN_031657	-3.51368155471538	-1.40233313223335	-	REFNigelle_031657.p1	AT5G57890.1	1.9e-20	ASB2 description:Anthranilate synthase beta subunit 2, chloroplastic [Source:Q9FJM5]	REFNigelle_031657.p1	Aqcoe3G419100.1.p	5e-26	AT4G25570.1	Cytochrome b561/ferric reductase transmembrane protein family
RN_031822	0.676767814129579	0.687494532770019	-	#N/A	#N/A	#N/A	#N/A	#N/A	#N/A	#N/A	#N/A	#N/A
RN_031823	0.50509292783952	0.255245466568292	-	#N/A	#N/A	#N/A	#N/A	#N/A	#N/A	#N/A	#N/A	#N/A
RN_031836	0.89449514118281	0.498431430965529	-	REFNigelle_031836.p1	AT3G43440.2	2.21e-12	TIFY3A description:Protein TIFY 3A [Source:Q9M246]	REFNigelle_031836.p1	Aqcoe5G341200.1.p	4e-15	AT5G13220.1	jasmonate-zim-domain protein 10
RN_031892	0.131309772976382	1.08911499876039	0.871855484863172	#N/A	#N/A	#N/A	#N/A	#N/A	#N/A	#N/A	#N/A	#N/A
RN_031922	-1.47941134569177	-1.71274322874431	-	#N/A	#N/A	#N/A	#N/A	#N/A	#N/A	#N/A	#N/A	#N/A
RN_031966	0.359948303021251	0.739297003102809	-	REFNigelle_031966.p1	AT1G48410.1	0	AGO1 description:ICU9 [Source:A0A178WL72]	REFNigelle_031966.p1	Aqcoe3G423400.1.p	0	AT1G48410.1	Stabilizer of iron transporter SufD / Polynucleotidyl transferase
RN_031968	-1.9635401910262	-2.8187913568605	0.932496445531842	#N/A	#N/A	#N/A	#N/A	#N/A	#N/A	#N/A	#N/A	#N/A
RN_031969	2.53398092566045	2.7248005140108	-	#N/A	#N/A	#N/A	#N/A	#N/A	#N/A	#N/A	#N/A	#N/A
RN_031972	0.394325459315305	0.365915199489295	-	#N/A	#N/A	#N/A	#N/A	#N/A	#N/A	#N/A	#N/A	#N/A
RN_031974	1.03746213540392	0.929103470083468	-	#N/A	#N/A	#N/A	#N/A	#N/A	#N/A	#N/A	#N/A	#N/A
RN_032008	-0.535254611591455	-0.243069995041223	-	REFNigelle_032008.p1	AT3G14290.1	2.86e-169	PAE2 description:Proteasome subunit alpha type-5-B [Source:Q42134]	REFNigelle_032008.p1	Aqcoe3G016700.2.p	4e-171	AT3G14290.1	20S proteasome alpha subunit E2
RN_032021	0.933661772918613	1.72180032301779	0.919650381741734	#N/A	#N/A	#N/A	#N/A	#N/A	#N/A	#N/A	#N/A	#N/A
RN_032062	0.11193760380582	0.333229794683043	-	REFNigelle_032062.p1	AT1G42470.1	0	Patched family protein [Source:TAIR;Acc:AT1G42470]	REFNigelle_032062.p1	Aqcoe6G176000.1.p	0	AT1G42470.1	Patched family protein
RN_032064	0.354535929442114	0.390994135340422	-	REFNigelle_032064.p2	AT3G24255.3	2.14e-15	RNA-directed DNA polymerase (Reverse transcriptase)-related family protein [Source:UniProtKB/TrEMBL;Acc:A0A1I9LSY4]	REFNigelle_032064.p2	Aqcoe7G262900.1.p	2e-16	AT4G29090.1	Ribonuclease H-like superfamily protein
RN_032156	-0.177485909585279	0.43561598740147	-	#N/A	#N/A	#N/A	#N/A	#N/A	#N/A	#N/A	#N/A	#N/A
RN_032165	0.859332635614104	0.804598648103959	-	#N/A	#N/A	#N/A	#N/A	#N/A	#N/A	#N/A	#N/A	#N/A
RN_032317	0.785644148076361	0.500618883485981	-	REFNigelle_032317.p1	AT3G45070.1	2.78e-67	Sulfotransferase [Source:UniProtKB/TrEMBL;Acc:A0A1I9LRV5]	REFNigelle_032317.p1	Aqcoe3G281700.1.p	3e-122	AT3G45070.1	P-loop containing nucleoside triphosphate hydrolases superfamily protein
RN_032386	0.00109329108455802	0.398725960218573	-	REFNigelle_032386.p1	AT2G20340.1	0	ELI5 description:Tyrosine decarboxylase 1 [Source:Q8RY79]	REFNigelle_032386.p1	Aqcoe5G011800.1.p	0	AT2G20340.1	Pyridoxal phosphate (PLP)-dependent transferases superfamily protein
RN_032426	0.0740713766566864	0.43642731347511	-	REFNigelle_032426.p1	AT1G71710.1	0	IP5P3 description:Type IV inositol polyphosphate 5-phosphatase 3 [Source:Q8H0Z6]	REFNigelle_032426.p1	Aqcoe6G046700.1.p	0	AT1G71710.1	DNAse I-like superfamily protein
RN_032606	-0.496611591219964	-0.411365156920431	-	REFNigelle_032606.p1	AT1G19600.1	0	At1g19600 [Source:UniProtKB/TrEMBL;Acc:Q9LN35]	REFNigelle_032606.p1	Aqcoe6G123900.1.p	0	AT1G19600.1	pfkB-like carbohydrate kinase family protein
RN_032666	0.439016242685147	0.365477969025488	-	REFNigelle_032666.p1	AT4G14070.1	5.24e-45	AAE15 description:Long-chain-fatty-acid--[acyl-carrier-protein] ligase AEE15, chloroplastic [Source:Q8W471]	REFNigelle_032666.p1	Aqcoe2G403600.1.p	1e-68	AT4G14070.1	acyl-activating enzyme 15
RN_032669	0.326988063221466	0.323849947893515	-	REFNigelle_032669.p1	AT3G23790.1	0	AAE16 description:Probable acyl-activating enzyme 16, chloroplastic [Source:Q9LK39]	REFNigelle_032669.p1	Aqcoe2G403600.1.p	0	AT4G14070.1	acyl-activating enzyme 15
RN_032670	-0.345371843567826	-0.287038979352061	-	REFNigelle_032670.p1	AT3G63440.1	1.7e-149	CKX6 description:Cytokinin dehydrogenase 6 [Source:Q9LY71]	REFNigelle_032670.p1	Aqcoe3G432400.1.p	0	AT3G63440.1	cytokinin oxidase/dehydrogenase 6
RN_032806	0.842839046215925	0.496306526433875	-	#N/A	#N/A	#N/A	#N/A	#N/A	#N/A	#N/A	#N/A	#N/A
RN_032807	-0.111748411263252	0.709974317331298	-	#N/A	#N/A	#N/A	#N/A	#N/A	#N/A	#N/A	#N/A	#N/A
RN_032809	0.189385054333347	0.657531867170534	-	#N/A	#N/A	#N/A	#N/A	#N/A	#N/A	#N/A	#N/A	#N/A
RN_032810	0.166620597788866	0.562502041362085	-	#N/A	#N/A	#N/A	#N/A	REFNigelle_032810.p1	Aqcoe3G341100.1.p	2e-12	0	0
RN_032879	-4.76705943011581	-2.20186654046307	0.895556403425747	REFNigelle_032879.p1	AT1G14190.2	1.63e-79	Glucose-methanol-choline (GMC) oxidoreductase family protein [Source:TAIR;Acc:AT1G14190]	REFNigelle_032879.p1	Aqcoe3G341600.1.p	2e-106	AT1G14190.1	Glucose-methanol-choline (GMC) oxidoreductase family protein
RN_032880	-0.405427247441187	0.0409679774311096	-	REFNigelle_032880.p1	AT1G14185.1	9.35e-176	At1g14180/F7A19_27 [Source:UniProtKB/TrEMBL;Acc:Q9XI69]	REFNigelle_032880.p1	Aqcoe3G341600.1.p	0	AT1G14190.1	Glucose-methanol-choline (GMC) oxidoreductase family protein
RN_032881	-4.24897433032042	-0.573087494783996	-	#N/A	#N/A	#N/A	#N/A	#N/A	#N/A	#N/A	#N/A	#N/A
RN_032895	-0.255437525081275	0.742903332954501	-	#N/A	#N/A	#N/A	#N/A	#N/A	#N/A	#N/A	#N/A	#N/A
RN_033007	0.35296539157618	0.454937771386448	-	REFNigelle_033007.p1	AT1G65770.1	1.16e-07	AMR1 description:Putative F-box protein At1g65770 [Source:Q9SHX9]	REFNigelle_033007.p1	Aqcoe6G059600.1.p	5e-22	AT2G17030.1	F-box family protein with a domain of unknown function (DUF295)
RN_033084	0.469192082783083	0.720567536062653	-	REFNigelle_033084.p1	AT2G29420.1	6.18e-64	GSTU7 description:Glutathione S-transferase U7 [Source:Q9ZW24]	REFNigelle_033084.p1	Aqcoe5G008600.1.p	1e-112	AT2G29420.1	glutathione S-transferase tau 7
RN_033090	0.753031507690565	1.01575934876803	-	REFNigelle_033090.p1	AT5G57930.2	0	APO2 description:Emb1629 [Source:A0A178UP75]	REFNigelle_033090.p1	Aqcoe6G317800.1.p	0	AT5G57930.2	Arabidopsis thaliana protein of unknown function (DUF794)
RN_033091	-0.560715202143418	-1.51158824696896	-	REFNigelle_033091.p1	AT5G57930.2	0	APO2 description:Emb1629 [Source:A0A178UP75]	REFNigelle_033091.p1	Aqcoe6G317800.1.p	0	AT5G57930.2	Arabidopsis thaliana protein of unknown function (DUF794)
RN_033093	0.487278148785641	0.347589829200616	-	#N/A	#N/A	#N/A	#N/A	#N/A	#N/A	#N/A	#N/A	#N/A
RN_033105	0.57914393430643	0.322758284347724	-	REFNigelle_033105.p1	AT5G42050.1	1.15e-106	DCD (Development and Cell Death) domain protein [Source:UniProtKB/TrEMBL;Acc:Q8RXN8]	REFNigelle_033105.p1	Aqcoe7G007700.1.p	7e-142	AT3G27090.1	DCD (Development and Cell Death) domain protein
RN_033143	-0.270156985808419	-0.0503858205389019	-	REFNigelle_033143.p1	AT3G01790.1	1.12e-112	At1g01640 [Source:UniProtKB/TrEMBL;Acc:Q7XA68]	REFNigelle_033143.p1	Aqcoe5G370700.2.p	2e-101	AT3G01790.1	Ribosomal protein L13 family protein
RN_033169	0.0955946905647528	-0.578487203703475	-	REFNigelle_033169.p1	AT4G28560.1	4.21e-138	RIC7 description:ROP-interactive CRIB motif-containing protein 7 [Source:F4JLB7]	REFNigelle_033169.p1	Aqcoe5G022000.1.p	1e-161	AT4G28560.1	ROP-interactive CRIB motif-containing protein 7
RN_033173	-0.039295822653935	-0.2276854064131	-	REFNigelle_033173.p1	AT3G24660.1	0	TMKL1 description:Putative kinase-like protein TMKL1 [Source:P33543]	REFNigelle_033173.p1	Aqcoe5G006200.1.p	0	AT3G24660.1	transmembrane kinase-like 1
RN_033181	0.279168223807439	-0.759453882307009	-	#N/A	#N/A	#N/A	#N/A	REFNigelle_033181.p1	Aqcoe3G218400.1.p	4e-85	0	0
RN_033183	1.21194435944802	-1.02817933208591	0.898562781779322	#N/A	#N/A	#N/A	#N/A	REFNigelle_033183.p1	Aqcoe3G218400.1.p	2e-45	0	0
RN_033192	1.95962611491857	2.83327607249106	-	REFNigelle_033192.p1	AT2G14660.1	1.18e-66	At2g14660 [Source:UniProtKB/TrEMBL;Acc:Q9ZVK5]	REFNigelle_033192.p1	Aqcoe5G042600.1.p	6e-80	AT2G14660.1	0
RN_033193	-1.89957016419867	-2.25408695222834	0.892727040394388	REFNigelle_033193.p1	AT2G14660.1	1.18e-66	At2g14660 [Source:UniProtKB/TrEMBL;Acc:Q9ZVK5]	REFNigelle_033193.p1	Aqcoe5G042600.1.p	6e-80	AT2G14660.1	0
RN_033198	-1.22895339298861	-0.54890519515432	-	REFNigelle_033198.p1	AT3G03220.1	4.24e-135	EXPA13 description:Expansin-A13 [Source:Q9M9P0]	REFNigelle_033198.p1	Aqcoe3G421000.1.p	4e-159	AT3G03220.1	expansin A13
RN_033199	0.355285782005135	0.209990129236967	-	REFNigelle_033199.p1	AT3G03220.1	4.06e-135	EXPA13 description:Expansin-A13 [Source:Q9M9P0]	REFNigelle_033199.p1	Aqcoe3G421000.1.p	5e-159	AT3G03220.1	expansin A13
RN_033245	1.12635845087854	0.473863631081161	-	#N/A	#N/A	#N/A	#N/A	#N/A	#N/A	#N/A	#N/A	#N/A
RN_033254	0.578194886633062	1.42797084758633	-	#N/A	#N/A	#N/A	#N/A	#N/A	#N/A	#N/A	#N/A	#N/A
RN_033256	0.407399899453136	1.32885068708774	-	#N/A	#N/A	#N/A	#N/A	#N/A	#N/A	#N/A	#N/A	#N/A
RN_033258	1.49143726851029	1.97480307136763	-	#N/A	#N/A	#N/A	#N/A	#N/A	#N/A	#N/A	#N/A	#N/A
RN_033260	1.95993010272247	2.70623127482834	-	#N/A	#N/A	#N/A	#N/A	#N/A	#N/A	#N/A	#N/A	#N/A
RN_033273	0.0892584615835361	1.14935377532835	-	REFNigelle_033273.p1	AT4G31690.1	5.34e-30	Transcriptional factor B3 family protein [Source:TAIR;Acc:AT4G31690]	REFNigelle_033273.p1	Aqcoe6G028500.1.p	1e-50	AT1G26680.1	transcriptional factor B3 family protein
RN_033284	0.0532371605032089	-0.589025237219502	-	REFNigelle_033284.p1	AT4G00260.1	5.02e-15	REM15.15 description:Putative B3 domain-containing protein REM15 [Source:O23076]	REFNigelle_033284.p1	Aqcoe6G028600.1.p	2e-27	AT4G31640.1	transcriptional factor B3 family protein
RN_033366	-1.2892318378955	-0.101903705191929	-	#N/A	#N/A	#N/A	#N/A	#N/A	#N/A	#N/A	#N/A	#N/A
RN_033494	-0.214318358659508	0.708302050872226	-	REFNigelle_033494.p1	AT3G22200.1	0	POP2 description:Pyridoxal phosphate (PLP)-dependent transferases superfamily protein [Source:AT3G22200]	REFNigelle_033494.p1	Aqcoe1G165200.1.p	0	AT3G22200.1	Pyridoxal phosphate (PLP)-dependent transferases superfamily protein
RN_033546	1.21335069511737	1.35176027271756	-	REFNigelle_033546.p1	AT5G17050.1	5.65e-145	UGT78D2 description:Glycosyltransferase (Fragment) [Source:W8PUE7]	REFNigelle_033546.p1	Aqcoe7G256600.1.p	0	AT5G17050.1	UDP-glucosyl transferase 78D2
RN_033571	-0.0314069882684565	1.03827358433247	0.854468026263796	REFNigelle_033571.p1	AT3G61790.1	2.32e-169	SINAT3 description:E3 ubiquitin-protein ligase [Source:A0A178V9V8]	REFNigelle_033571.p1	Aqcoe2G036800.1.p	0	AT3G61790.1	Protein with RING/U-box and TRAF-like domains
RN_033583	2.0394973706797	2.2084016028289	-	#N/A	#N/A	#N/A	#N/A	#N/A	#N/A	#N/A	#N/A	#N/A
RN_033677	0.36432978097627	0.130497975221113	-	REFNigelle_033677.p1	AT4G14660.2	2.38e-82	NRPE7 description:DNA-directed RNA polymerase V subunit 7 [Source:A6QRA1]	REFNigelle_033677.p1	Aqcoe3G126500.1.p	2e-99	AT4G14660.1	RNA polymerase Rpb7-like, N-terminal domain
RN_033731	0.415910323638156	0.451221321475527	-	REFNigelle_033731.p1	AT3G04580.2	0	EIN4 description:Ethylene receptor [Source:A0A178VKQ4]	REFNigelle_033731.p1	Aqcoe5G032500.1.p	0	AT3G23150.1	Signal transduction histidine kinase, hybrid-type, ethylene sensor
RN_033736	0.0769249909477724	0.333291866930418	-	REFNigelle_033736.p1	AT1G75900.1	3.07e-141	EXL3 description:GDSL esterase/lipase EXL3 [Source:Q94CH6]	REFNigelle_033736.p1	Aqcoe6G220300.1.p	0	AT1G75900.1	GDSL-like Lipase/Acylhydrolase superfamily protein
RN_033744	0.460394263419485	0.680435959645709	-	#N/A	#N/A	#N/A	#N/A	#N/A	#N/A	#N/A	#N/A	#N/A
RN_033813	-0.102612201064959	0.31223966420072	-	REFNigelle_033813.p1	AT2G31670.1	1.57e-50	UP3 description:Stress-response A/B barrel domain-containing protein UP3 [Source:Q9SIP1]	REFNigelle_033813.p1	Aqcoe7G435900.2.p	7e-71	AT2G31670.1	Stress responsive alpha-beta barrel domain protein
RN_033844	-0.0540878046496826	-0.311139332293967	-	REFNigelle_033844.p1	AT1G08560.1	9.67e-134	KN description:SYP111 [Source:A0A178WAC8]	REFNigelle_033844.p1	Aqcoe6G120000.1.p	2e-163	AT1G08560.1	syntaxin of plants 111
RN_033877	0.328523930280431	0.28098154209534	-	REFNigelle_033877.p1	AT2G43820.1	8.91e-171	UGT74F2 description:Glycosyltransferase [Source:A0A178VQS4]	REFNigelle_033877.p1	Aqcoe3G281800.1.p	0	AT2G43820.1	UDP-glucosyltransferase 74F2
RN_033894	1.29232331635088	0.831074209303319	-	#N/A	#N/A	#N/A	#N/A	#N/A	#N/A	#N/A	#N/A	#N/A
RN_033914	-0.556342219036454	-0.724312183276373	-	#N/A	#N/A	#N/A	#N/A	#N/A	#N/A	#N/A	#N/A	#N/A
RN_033948	0.649088055752038	0.595429139427822	-	REFNigelle_033948.p1	AT1G27000.1	5.24e-91	At1g27000/T7N9_6 [Source:UniProtKB/TrEMBL;Acc:Q9C5M5]	REFNigelle_033948.p1	Aqcoe3G328200.1.p	3e-132	AT1G27000.1	Protein of unknown function (DUF1664)
RN_034001	-1.10602923501256	-1.09698669535616	-	#N/A	#N/A	#N/A	#N/A	#N/A	#N/A	#N/A	#N/A	#N/A
RN_034032	-2.37643091149791	-0.363712088564124	-	#N/A	#N/A	#N/A	#N/A	#N/A	#N/A	#N/A	#N/A	#N/A
RN_034075	-0.105120604980592	-0.405635833793593	-	REFNigelle_034075.p1	AT5G15220.1	8.1e-69	AT5g15220/F8M21_110 [Source:UniProtKB/TrEMBL;Acc:Q94AC6]	REFNigelle_034075.p1	Aqcoe1G248200.1.p	3e-92	AT5G15220.1	Ribosomal protein L27 family protein
RN_034220	-0.724816819654197	0.189561555214336	-	#N/A	#N/A	#N/A	#N/A	#N/A	#N/A	#N/A	#N/A	#N/A
RN_034303	1.83164285245423	2.28913567822203	-	#N/A	#N/A	#N/A	#N/A	#N/A	#N/A	#N/A	#N/A	#N/A
RN_034394	-1.00641772570011	0.324288190152254	-	#N/A	#N/A	#N/A	#N/A	#N/A	#N/A	#N/A	#N/A	#N/A
RN_034549	0.573963999432229	0.660551713417025	-	#N/A	#N/A	#N/A	#N/A	#N/A	#N/A	#N/A	#N/A	#N/A
RN_034627	-0.486417970469625	-0.425379161316858	-	REFNigelle_034627.p1	AT5G51440.1	1.2e-15	HSP23.5 description:23.5 kDa heat shock protein, mitochondrial [Source:Q9FGM9]	REFNigelle_034627.p1	Aqcoe5G417000.1.p	5e-11	AT4G25200.1	mitochondrion-localized small heat shock protein 23.6
RN_034638	-0.531388342522839	-0.49726940240964	-	#N/A	#N/A	#N/A	#N/A	#N/A	#N/A	#N/A	#N/A	#N/A
RN_034688	-1.24485421130233	-0.925723349379786	-	REFNigelle_034688.p1	AT5G11470.2	5.34e-132	bromo-adjacent homology (BAH) domain-containing protein [Source:TAIR;Acc:AT5G11470]	REFNigelle_034688.p1	Aqcoe7G023700.1.p	4e-117	AT5G11470.1	bromo-adjacent homology (BAH) domain-containing protein
RN_034718	0.572935260530067	0.277888176481978	-	REFNigelle_034718.p1	AT3G58130.2	1.59e-106	At3g58130 [Source:UniProtKB/TrEMBL;Acc:Q6DBN0]	REFNigelle_034718.p1	Aqcoe6G183700.2.p	2e-140	AT3G58130.1	N-acetylglucosaminylphosphatidylinositol de-N-acetylase family protein
RN_034774	0.170170969161535	0.591626008551663	-	#N/A	#N/A	#N/A	#N/A	#N/A	#N/A	#N/A	#N/A	#N/A
RN_034775	0.426881390523537	0.646197289942121	-	#N/A	#N/A	#N/A	#N/A	#N/A	#N/A	#N/A	#N/A	#N/A
RN_034846	0.124976938982827	0.914690479522356	-	REFNigelle_034846.p1	AT5G55150.1	8.98e-10	Putative F-box protein At5g55150 [Source:UniProtKB/Swiss-Prot;Acc:Q9FLP7]	REFNigelle_034846.p1	Aqcoe5G126400.1.p	4e-37	AT2G17030.1	F-box family protein with a domain of unknown function (DUF295)
RN_034970	-2.0028823503385	-1.95945826387109	-	#N/A	#N/A	#N/A	#N/A	#N/A	#N/A	#N/A	#N/A	#N/A
RN_035029	0.444825870836003	0.22525124302915	-	REFNigelle_035029.p1	AT4G02590.3	1.89e-95	UNE12 description:Transcription factor UNE12 [Source:O22768]	REFNigelle_035029.p1	Aqcoe5G042200.1.p	6e-128	AT1G03040.2	basic helix-loop-helix (bHLH) DNA-binding superfamily protein
RN_035103	-1.3844983673731	-1.08427598645887	-	REFNigelle_035103.p1	AT3G28730.1	2.07e-76	SSRP1 description:FACT complex subunit SSRP1 [Source:A0A178VCP0]	REFNigelle_035103.p1	Aqcoe3G328000.1.p	7e-77	AT3G28730.1	high mobility group
RN_035236	-0.951097280034995	-1.60473844290858	-	REFNigelle_035236.p1	AT1G68000.1	4.45e-122	PIS1 description:CDP-diacylglycerol--inositol 3-phosphatidyltransferase 1 [Source:Q8LBA6]	REFNigelle_035236.p1	Aqcoe1G015600.2.p	2e-148	AT1G68000.1	phosphatidylinositol synthase 1
RN_035241	-1.38085405223249	-2.20104525618076	-	REFNigelle_035241.p1	AT3G04760.2	1.01e-92	Pentatricopeptide repeat-containing protein At3g04760, chloroplastic [Source:UniProtKB/Swiss-Prot;Acc:Q9SR00]	REFNigelle_035241.p1	Aqcoe5G023800.1.p	1e-116	AT3G04760.1	Pentatricopeptide repeat (PPR-like) superfamily protein
RN_035272	-0.851296517648724	-1.69479570326813	-	#N/A	#N/A	#N/A	#N/A	#N/A	#N/A	#N/A	#N/A	#N/A
RN_035406	-1.0075250525199	-0.950768982608067	-	REFNigelle_035406.p1	AT3G23100.2	4.64e-77	XRCC4 description:DNA repair protein XRCC4 [Source:Q682V0]	REFNigelle_035406.p1	Aqcoe5G036600.1.p	3e-98	AT3G23100.1	homolog of human DNA ligase iv-binding protein XRCC4
RN_035505	-0.120114546665269	-0.239650001564004	-	REFNigelle_035505.p1	AT4G14330.1	0	KIN10A description:Kinesin-like protein KIN-10A [Source:Q8VWI7]	REFNigelle_035505.p1	Aqcoe5G021200.1.p	0	AT4G14330.1	P-loop containing nucleoside triphosphate hydrolases superfamily protein
RN_035591	1.47379192634391	2.2372729368624	-	#N/A	#N/A	#N/A	#N/A	#N/A	#N/A	#N/A	#N/A	#N/A
RN_035748	-0.102903295926026	-0.378407872669008	-	REFNigelle_035748.p1	AT1G69800.2	0	Cystathionine beta-synthase (CBS) protein [Source:TAIR;Acc:AT1G69800]	REFNigelle_035748.p1	Aqcoe3G329900.1.p	0	AT1G69800.2	Cystathionine beta-synthase (CBS) protein
RN_035790	2.22482795028626	1.18889190197735	-	#N/A	#N/A	#N/A	#N/A	#N/A	#N/A	#N/A	#N/A	#N/A
RN_035793	-1.3971869885843	-2.513140978494		REFNigelle_035793.p1	AT3G54340.1	5.33e-69	AP3 description:Floral homeotic protein APETALA 3 [Source:P35632]	REFNigelle_035793.p1	Aqcoe5G180800.1.p	6e-136	AT3G54340.1	K-box region and MADS-box transcription factor family protein
RN_035848	-0.082188590576389	-0.536878132909595	-	REFNigelle_035848.p1	AT4G13940.4	6.42e-169	SAHH1 description:Adenosylhomocysteinase 1 [Source:O23255]	REFNigelle_035848.p1	Aqcoe2G405100.1.p	1e-167	AT4G13940.1	S-adenosyl-L-homocysteine hydrolase
RN_035849	-0.163363217711342	-0.394167454841225	-	REFNigelle_035849.p1	AT4G13940.4	1.5e-168	SAHH1 description:Adenosylhomocysteinase 1 [Source:O23255]	REFNigelle_035849.p1	Aqcoe2G405100.1.p	2e-167	AT4G13940.1	S-adenosyl-L-homocysteine hydrolase
RN_035852	-0.281277595170481	-0.178652739038303	-	REFNigelle_035852.p1	AT3G23810.1	0	SAHH2 description:Adenosylhomocysteinase [Source:A0A178VEP9]	REFNigelle_035852.p1	Aqcoe2G405100.1.p	0	AT4G13940.1	S-adenosyl-L-homocysteine hydrolase
RN_036013	-3.94851663152732	-1.85381765298499	-	REFNigelle_036013.p1	AT1G26940.1	4.47e-124	CYP23 description:Peptidyl-prolyl cis-trans isomerase CYP23 [Source:Q8LDR3]	REFNigelle_036013.p1	Aqcoe3G333300.1.p	3e-144	AT1G26940.1	Cyclophilin-like peptidyl-prolyl cis-trans isomerase family protein
RN_036014	0.489168646528104	0.897630584539465	-	REFNigelle_036014.p1	AT1G26940.1	4.47e-124	CYP23 description:Peptidyl-prolyl cis-trans isomerase CYP23 [Source:Q8LDR3]	REFNigelle_036014.p1	Aqcoe3G333300.1.p	3e-144	AT1G26940.1	Cyclophilin-like peptidyl-prolyl cis-trans isomerase family protein
RN_036064	-0.308025904507324	-0.951434020199473	-	REFNigelle_036064.p1	AT1G80130.1	4.06e-13	F18B13.21 protein [Source:UniProtKB/TrEMBL;Acc:Q9SSC6]	REFNigelle_036064.p1	Aqcoe7G387200.1.p	6e-33	AT5G20190.1	Tetratricopeptide repeat (TPR)-like superfamily protein
RN_036245	-1.65012482458814	-0.564396536464315	-	REFNigelle_036245.p1	AT3G22980.1	0	Ribosomal protein S5/Elongation factor G/III/V family protein [Source:UniProtKB/TrEMBL;Acc:F4J2T9]	REFNigelle_036245.p1	Aqcoe2G289000.1.p	0	AT3G22980.1	Ribosomal protein S5/Elongation factor G/III/V family protein
RN_036333	-1.81649022041231	-1.98404314953063	-	REFNigelle_036333.p1	AT3G23440.1	5.54e-19	EDA6 description:Embryo sac development arrest 6 [Source:Q9LW53]	REFNigelle_036333.p1	Aqcoe5G020400.1.p	1e-36	AT5G44060.1	0
RN_036377	0.00414671669533326	2.19102771672232	-	#N/A	#N/A	#N/A	#N/A	#N/A	#N/A	#N/A	#N/A	#N/A
RN_036398	0.430683779673383	0.236275529695935	-	REFNigelle_036398.p1	AT2G24270.2	0	ALDH11A3 description:aldehyde dehydrogenase 11A3 [Source:AT2G24270]	REFNigelle_036398.p1	Aqcoe7G314400.1.p	0	AT2G24270.1	aldehyde dehydrogenase 11A3
RN_036418	0.446029709647365	-0.0752183113673496	-	REFNigelle_036418.p1	AT2G30490.1	0	CYP73A5 description:Cinnamate-4-hydroxylase [Source:B1GV49]	REFNigelle_036418.p1	Aqcoe1G146200.1.p	0	AT2G30490.1	cinnamate-4-hydroxylase
RN_036445	0.748891171548195	1.31421749813751	0.852900105729149	REFNigelle_036445.p1	AT2G32060.2	4.1e-62	RPS12C description:40S ribosomal protein S12 [Source:A0A178VU31]	REFNigelle_036445.p1	Aqcoe7G314900.1.p	1e-82	AT2G32060.1	Ribosomal protein L7Ae/L30e/S12e/Gadd45 family protein
RN_036447	-0.845854428928557	-0.945427766954961	-	REFNigelle_036447.p1	AT2G32060.2	4.1e-62	RPS12C description:40S ribosomal protein S12 [Source:A0A178VU31]	REFNigelle_036447.p1	Aqcoe7G314900.1.p	1e-82	AT2G32060.1	Ribosomal protein L7Ae/L30e/S12e/Gadd45 family protein
RN_036558	1.36149332811309	0.385667004829079	-	#N/A	#N/A	#N/A	#N/A	#N/A	#N/A	#N/A	#N/A	#N/A
RN_036566	0.181977436777706	0.245911857932162	-	REFNigelle_036566.p1	AT1G72970.1	0	HTH description:HTH [Source:A0A178WG21]	REFNigelle_036566.p1	Aqcoe7G427000.1.p	0	AT1G72970.1	Glucose-methanol-choline (GMC) oxidoreductase family protein
RN_036590	1.84053766853867	2.77994727647005	-	#N/A	#N/A	#N/A	#N/A	#N/A	#N/A	#N/A	#N/A	#N/A
RN_036605	-2.17989974997235	-2.52455360223009	-	REFNigelle_036605.p1	AT3G24320.1	0	MSH1 description:DNA mismatch repair protein MSH1, mitochondrial [Source:Q84LK0]	REFNigelle_036605.p1	Aqcoe5G014400.1.p	0	AT3G24320.1	MUTL protein homolog 1
RN_036606	0.991897695145779	1.54633141062243	-	REFNigelle_036606.p1	AT3G24320.1	0	MSH1 description:DNA mismatch repair protein MSH1, mitochondrial [Source:Q84LK0]	REFNigelle_036606.p1	Aqcoe5G014400.1.p	0	AT3G24320.1	MUTL protein homolog 1
RN_036642	-0.673787340853487	-0.222597004547836	-	REFNigelle_036642.p1	AT5G23420.1	2e-44	HMGB7 description:High mobility group B protein 7 [Source:Q8LDF9]	REFNigelle_036642.p1	Aqcoe3G441000.1.p	5e-54	AT5G23420.1	high-mobility group box 6
RN_036706	-1.78580583074436	-2.37812777914927	-	REFNigelle_036706.p1	AT3G04470.1	0	Ankyrin repeat family protein [Source:UniProtKB/TrEMBL;Acc:Q9M840]	REFNigelle_036706.p1	Aqcoe5G021000.1.p	0	AT3G04470.1	Ankyrin repeat family protein
RN_036707	1.53352593113921	2.17609064220885	-	REFNigelle_036707.p1	AT3G04470.1	0	Ankyrin repeat family protein [Source:UniProtKB/TrEMBL;Acc:Q9M840]	REFNigelle_036707.p1	Aqcoe5G021000.1.p	0	AT3G04470.1	Ankyrin repeat family protein
RN_036881	-0.428478414976394	-1.0767638583826	-	REFNigelle_036881.p2	AT1G43760.1	4.93e-13	DNAse I-like superfamily protein [Source:UniProtKB/TrEMBL;Acc:F4ICS8]	REFNigelle_036881.p2	Aqcoe7G254300.1.p	6e-10	AT1G43760.1	DNAse I-like superfamily protein
RN_036893	0.202701587395734	0.351837735497517	-	REFNigelle_036893.p1	AT5G57300.2	8.98e-161	COQ5 description:2-methoxy-6-polyprenyl-1,4-benzoquinol methylase, mitochondrial [Source:A0A178U865]	REFNigelle_036893.p1	Aqcoe7G393900.1.p	0	AT5G57300.3	S-adenosyl-L-methionine-dependent methyltransferases superfamily protein
RN_036910	-1.44184225943125	-0.868952847970291	0.949632959582256	#N/A	#N/A	#N/A	#N/A	#N/A	#N/A	#N/A	#N/A	#N/A
RN_036913	1.14512361331724	1.00969458838413		REFNigelle_036913.p1	AT1G08630.6	0	THA1 description:Probable low-specificity L-threonine aldolase 1 [Source:Q8RXU4]	REFNigelle_036913.p1	Aqcoe5G024700.6.p	0	AT1G08630.3	threonine aldolase 1
RN_036924	-0.304473838645248	-0.372043386811506	-	REFNigelle_036924.p1	AT4G01870.2	0	tolB protein-related [Source:TAIR;Acc:AT4G01870]	REFNigelle_036924.p1	Aqcoe2G262900.1.p	0	AT4G01870.1	tolB protein-related
RN_037049	0.271841645580689	-0.452614421694273	-	REFNigelle_037049.p1	AT4G12290.1	0	Amine oxidase [Source:UniProtKB/TrEMBL;Acc:Q8L742]	REFNigelle_037049.p1	Aqcoe7G073400.1.p	0	AT4G12290.1	Copper amine oxidase family protein
RN_037062	0.806102671958592	0.486671685372093	-	#N/A	#N/A	#N/A	#N/A	#N/A	#N/A	#N/A	#N/A	#N/A
RN_037086	0.895651984246042	1.27356234153013	-	REFNigelle_037086.p1	AT1G14270.1	3.37e-131	CAAX amino terminal protease family protein [Source:UniProtKB/TrEMBL;Acc:F4HUI0]	REFNigelle_037086.p1	Aqcoe3G337300.1.p	8e-165	AT1G14270.1	CAAX amino terminal protease family protein
RN_037095	0.124040517477219	0.657321987040368	-	#N/A	#N/A	#N/A	#N/A	#N/A	#N/A	#N/A	#N/A	#N/A
RN_037230	0.686452738333187	0.389015048296305	-	REFNigelle_037230.p1	AT4G25150.1	3.16e-54	Acid phosphatase-like protein [Source:UniProtKB/TrEMBL;Acc:Q9SW12]	REFNigelle_037230.p1	Aqcoe3G270900.1.p	2e-46	AT4G25150.1	HAD superfamily, subfamily IIIB acid phosphatase
RN_037232	0.294105558285605	0.529698616806703	-	REFNigelle_037232.p1	AT4G29260.1	4.12e-82	Acid phosphatase-like protein [Source:UniProtKB/TrEMBL;Acc:Q9M0F5]	REFNigelle_037232.p1	Aqcoe7G419200.1.p	2e-73	AT4G29260.1	HAD superfamily, subfamily IIIB acid phosphatase
RN_037471	0.259880081565199	0.311289829319129	-	REFNigelle_037471.p1	AT3G54400.1	1.71e-133	AT3g54400/T12E18_90 [Source:UniProtKB/TrEMBL;Acc:Q9M2U7]	REFNigelle_037471.p1	Aqcoe2G041400.2.p	3e-130	AT3G54400.1	Eukaryotic aspartyl protease family protein
RN_037521	0.142137494270677	0.459558914733047	-	#N/A	#N/A	#N/A	#N/A	#N/A	#N/A	#N/A	#N/A	#N/A
[truncated: 770 more rows]

## Sheet: TableS4
N. damascena homologs of the floral genes co-expressed with ABCE MADS-box genes in A. thaliana with a Pearson correlation coefficient (r-value) cut-off fixed at 0.5
[truncated: 32,772 more rows]

## Sheet: TableS5
List of A. thaliana best correlated genes (BCGs) with the ABCE MADS-box genes which have at least one homolog in Nigella
[truncated: 18 more rows]

[truncated: 3 more sheets: Table S6, TableS7, TableS8]
